# Supplementary material for: Analysis of the circadian transcriptome of the Antarctic krill Euphausia superba
Source: PubMed Central journal article supplement (PMC6761102; doi:10.1038/s41598-019-50282-1), 2019-09-25
Supplement: 41598_2019_50282_MOESM1_ESM.pdf [file 41598_2019_50282_MOESM1_ESM.pdf]

## **Analysis of the circadian transcriptome of the Antarctic krill *Euphausia superba***

Alberto Biscontin<sup>1,2,\*</sup>, Paolo Martini<sup>1</sup>, Rodolfo Costa<sup>1</sup>, Achim Kramer<sup>2</sup>, Bettina Meyer<sup>3,4,5</sup>, So Kawaguchi<sup>6</sup>, Mathias Teschke<sup>3</sup>, Cristiano De Pittà<sup>1,\*</sup>

<sup>1</sup>Dipartimento di Biologia, Università degli Studi di Padova, Padova, Italy

<sup>2</sup>Laboratory of Chronobiology, Charité Universitätsmedizin Berlin, Berlin, Germany

<sup>3</sup>Section Polar Biological Oceanography, Alfred Wegener Institute Helmholtz Centre for Polar and Marine Research, Bremerhaven, Germany

<sup>4</sup>Institute for Chemistry and Biology of the Marine Environment, Carl von Ossietzky University of Oldenburg, Oldenburg, Germany

<sup>5</sup>Helmholtz Institute for Functional Marine Biodiversity (HIFMB) at the University of Oldenburg, 26111 Oldenburg, Germany

<sup>6</sup>Department of Environment and Heritage, Australian Antarctic Division, Kingston, Tasmania, Australia

\*Corresponding authors:

Cristiano De Pittà, Dipartimento di Biologia, Università degli Studi di Padova, via U. Bassi 58/B 35131 Padova, Italy; Phone: +39-049-8276210; Fax: +39-049-8276209; e-mail address: cristiano.depitta@unipd.it

Alberto Biscontin, Dipartimento di Biologia, Università degli Studi di Padova, via U. Bassi 58/B 35131 Padova, Italy; Phone: +39-049-8276228; Fax: +39-049-8276209; e-mail address: alberto.biscontin@unipd.it

## SUPPLEMENTARY FIGURES

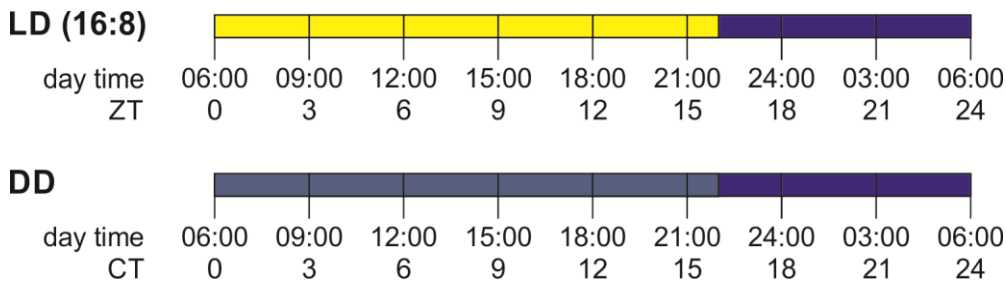

### Supplementary Figure 1. Experimental design.

In order to define the gene expression profiles, specimens were collected at regular intervals throughout the 24-hour cycle in a light:dark (LD) regime of 16 hours light and 8 hours darkness followed by constant darkness (DD). Yellow and blue bars refer to light and dark periods, respectively.

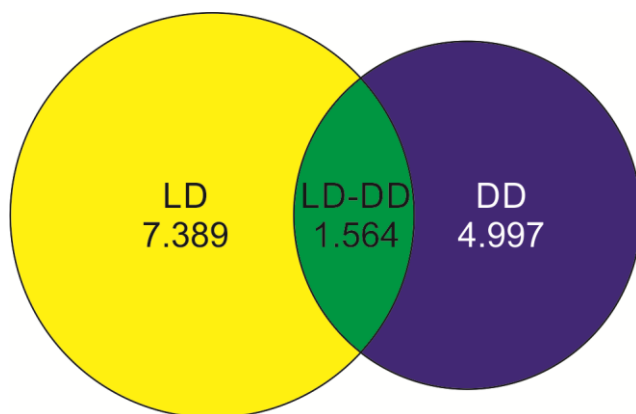

### Supplementary Figure 2. Circadian expression signatures.

A weighted Venn diagram showing the relative portion of genes with sinusoidal expression patterns (RAIN) in LD and DD (see Table S1 and S2). The intersection represents putative clock-controlled genes with an oscillatory expression both in LD and DD (see Table S3).

LD

■ Array ■ qPCR

DD

6-4 photolyase

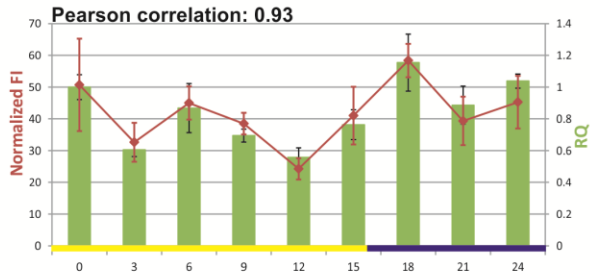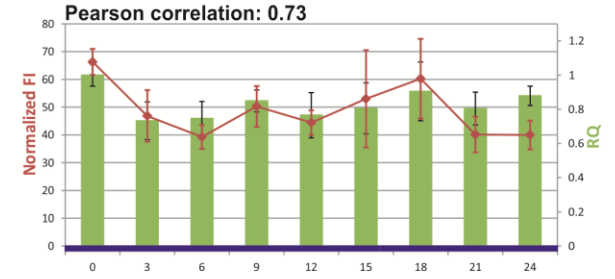

Arrestin

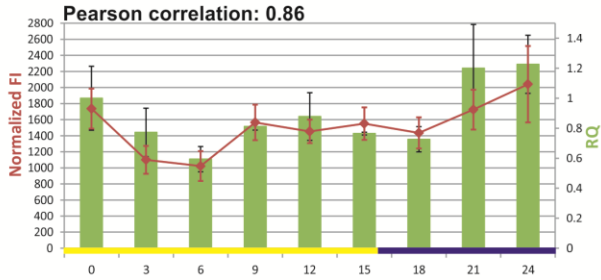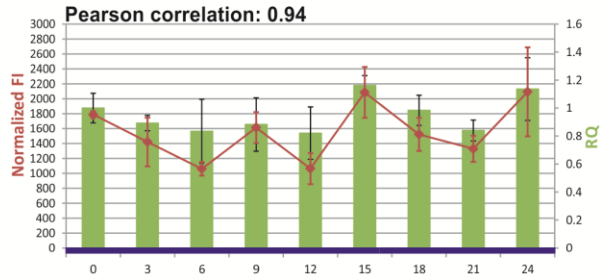

Nina-C

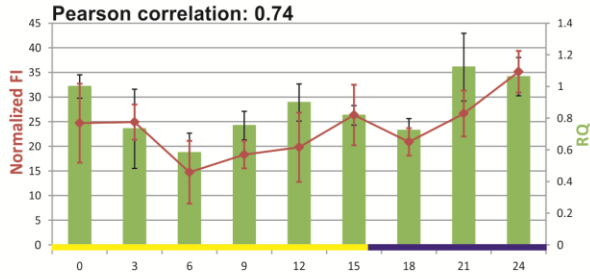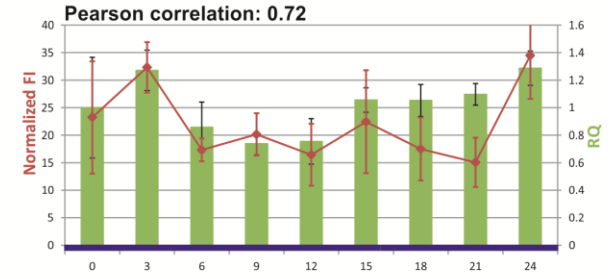

Casein kinase ε

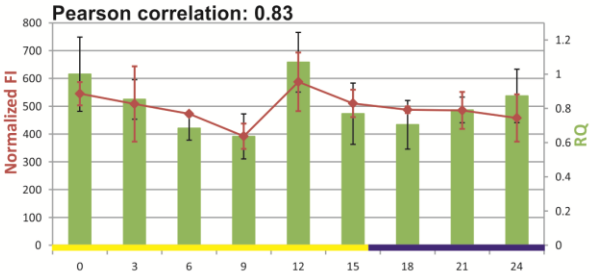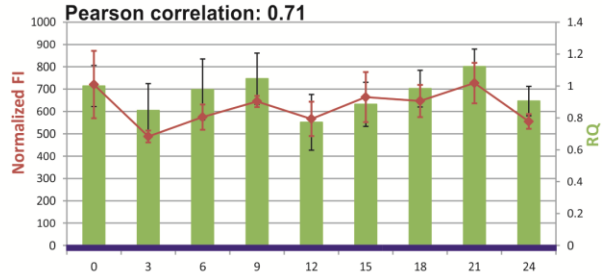

Slimb

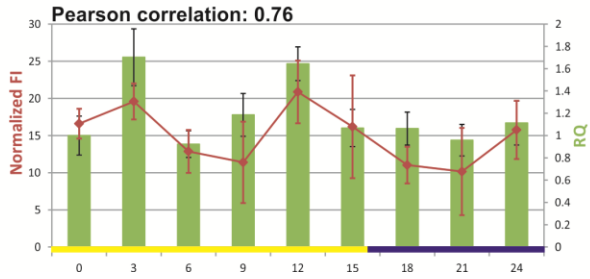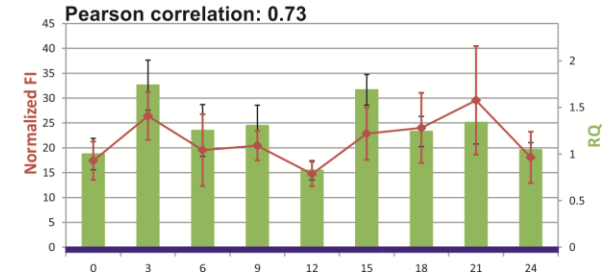

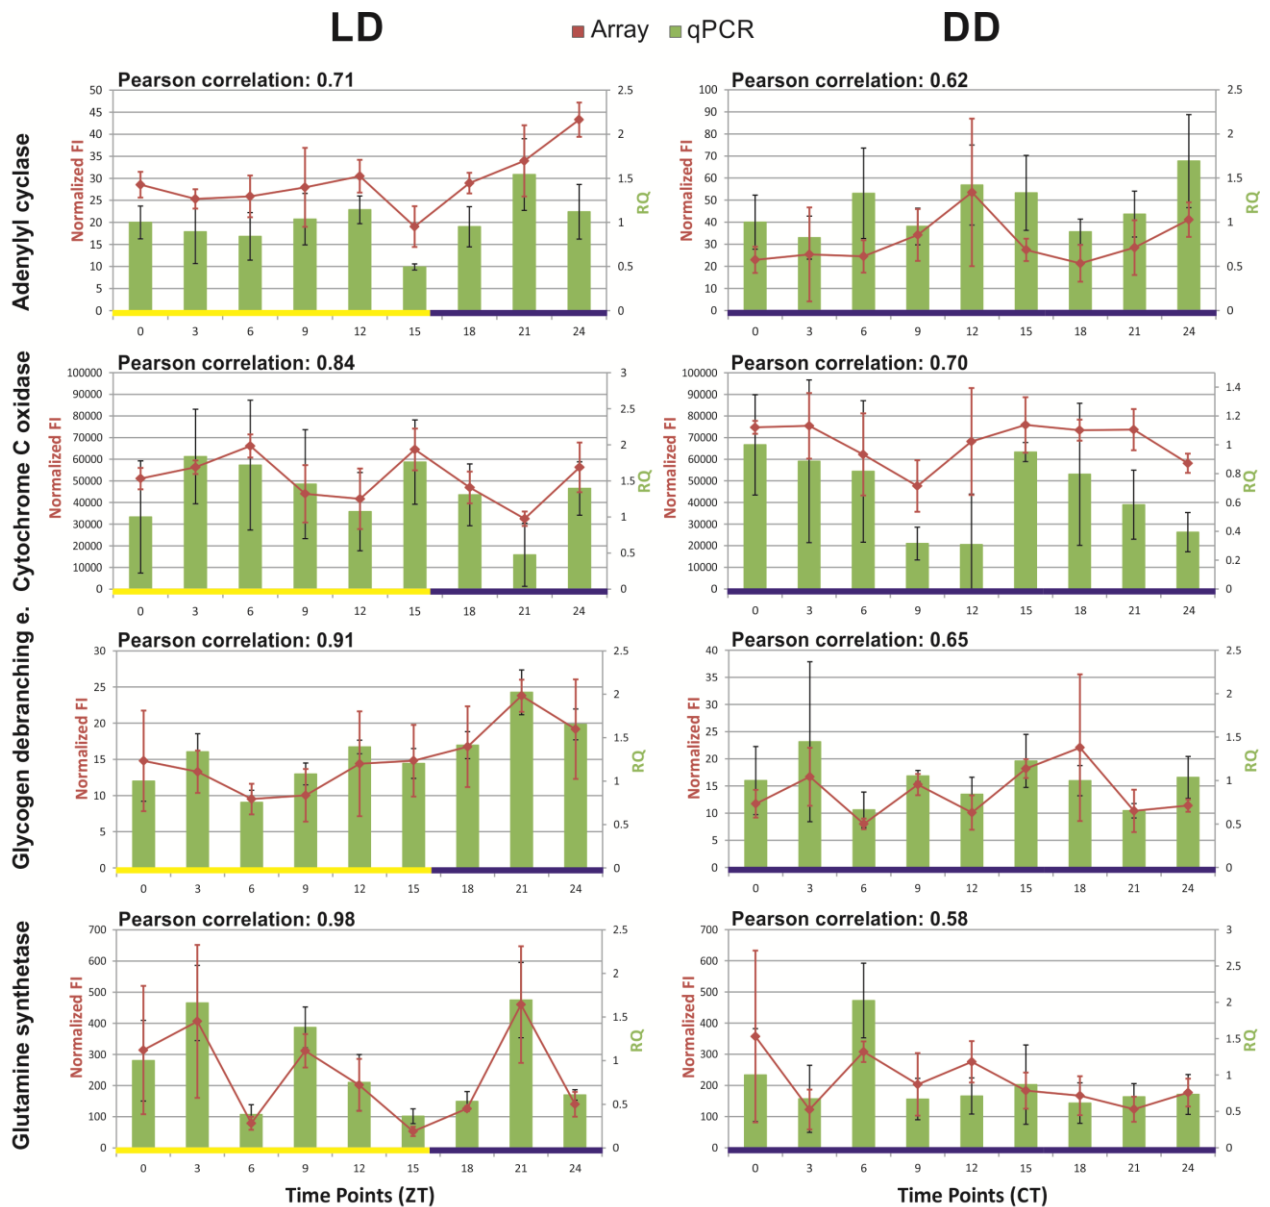

**Supplementary Figure 3. Validation of microarray expression values by qRT-PCR.**

mRNA expression levels are represented by histograms. Normalized qRT-PCR data are expressed as fold changes (RQ) relative to the average expression for ZT0 and CT0. Yellow and blue bars refer to light and dark periods, respectively. *Ubiquitin carboxyl-terminal hydrolase 46* and *RNA polymerase I-specific transcription initiation factor RRN3 isoform 1* were used as endogenous controls. The microarray expression profiles of each gene are shown as line graphs (red) while qRT-PCR results are reported as histograms. Pearson correlation was calculated to estimate the association between microarray data and qRT-PCR results ( $r > 0.6$  is considered as statistically significant).

## SUPPLEMENTARY TABLES

```
>require(rain)
>data<-read.table(file)
>result<-rain(data, period=18, period.delta=6, deltat=3, nr.series=3, method='independent')
```

**Supplementary Table 7.** List of commands used to identify genes showing rhythmic expression profiles during the 24 hours in microarray data by using RAIN.

| Description                                                              | Forward Primer (5'-3')   | Reverse Primer (5'-3')  |
|--------------------------------------------------------------------------|--------------------------|-------------------------|
| 6-4 photolyase                                                           | CTTGGAACGCACCACTCTCT     | CACGATTCTACGTGGGTAGTCC  |
| arrestin homolog                                                         | AGCTAGTTCACCCAGACCCA     | ACGGCGGAGGTTCTTGAAAT    |
| casein kinase 1 epsilon                                                  | TATTGTCTCGTCGGCTTGC      | TGGGTATTTGGATCCTACAACAT |
| neither inactivation nor afterpotential protein C                        | AACTGAAGTTGCAATAAAGGATCA | TGCCTCCACCATATGTAGTCC   |
| slimb                                                                    | GCTGCCACAGATGCTTCA       | TGCCTCCACCATATGTAGTCC   |
| cytochrome c oxidase subunit I                                           | GCAATAAGCGAATGGTTGACC    | GATACTCAGACTACCCAGATGC  |
| glycogen debranching enzyme                                              | TGCAAATGAGTCTCCATGGC     | TGTGCAGTAGACGATCAAGG    |
| glutamine synthetase                                                     | TGTATCTTCCTCCAGGATGGC    | ATACATGGCCTGGCATTTCG    |
| adenyl cyclase                                                           | AGCAACACCAGCAGTTTAGG     | TTCATGGTCACCACATACGG    |
|                                                                          |                          |                         |
| clock                                                                    | GCTGCAGCAAATGATAATGC     | TGCCATATTGGGCCATAACT    |
| cryptochrome 2                                                           | TCATGAACCATGGACTGCAC     | GGTGGACACGACTTCAACAA    |
| period                                                                   | GCAGCTATGCCCAACTTTAATC   | GGACTAGCAACAGGGACATTTT  |
|                                                                          |                          |                         |
| ubiquitin carboxyl-terminal hydrolase 46                                 | AAATCGTCAGAAACGGGCTA     | TTAGCGGTTATGGAACATTACG  |
| RNA polymerase I-specific transcription initiation factor RRN3 isoform 1 | CTTGGACGGGGTAGTTCCTA     | TGTGATGTTTACCTCCGCAGT   |

**Supplementary Table 8.** Primers used in quantitative qRT-PCR.
