# Supplementary material for: Analysis of the circadian transcriptome of the Antarctic krill Euphausia superba
Source: PubMed Central journal article supplement (PMC6761102; doi:10.1038/s41598-019-50282-1), 2019-09-25
Supplement: 41598_2019_50282_MOESM4_ESM.pdf [file 41598_2019_50282_MOESM4_ESM.pdf]

## **Analysis of the circadian transcriptome of the Antarctic krill *Euphausia superba***

Alberto Biscontin<sup>1,2,\*</sup>, Paolo Martini<sup>1</sup>, Rodolfo Costa<sup>1</sup>, Achim Kramer<sup>2</sup>, Bettina Meyer<sup>3,4,5</sup>,  
So Kawaguchi<sup>6</sup>, Mathias Teschke<sup>3</sup>, Cristiano De Pittà<sup>1,\*</sup>

<sup>1</sup>Dipartimento di Biologia, Università degli Studi di Padova, Padova, Italy

<sup>2</sup>Laboratory of Chronobiology, Charité Universitätsmedizin Berlin, Berlin, Germany

<sup>3</sup>Section Polar Biological Oceanography, Alfred Wegener Institute Helmholtz Centre for Polar and Marine Research, Bremerhaven, Germany

<sup>4</sup>Institute for Chemistry and Biology of the Marine Environment, Carl von Ossietzky University of Oldenburg, Oldenburg, Germany

<sup>5</sup>Helmholtz Institute for Functional Marine Biodiversity (HIFMB) at the University of Oldenburg, 26111 Oldenburg, Germany

<sup>6</sup>Department of Environment and Heritage, Australian Antarctic Division, Kingston, Tasmania, Australia

\*Corresponding authors:

Cristiano De Pittà, Dipartimento di Biologia, Università degli Studi di Padova, via U. Bassi 58/B 35131 Padova, Italy; Phone: +39-049-8276210; Fax: +39-049-8276209; e-mail address: cristiano.depitta@unipd.it

Alberto Biscontin, Dipartimento di Biologia, Università degli Studi di Padova, via U. Bassi 58/B 35131 Padova, Italy; Phone: +39-049-8276228; Fax: +39-049-8276209; e-mail address: alberto.biscontin@unipd.it
