# Supplementary material for: Analysis of the circadian transcriptome of the Antarctic krill Euphausia superba
Source: PubMed Central journal article supplement (PMC6761102; doi:10.1038/s41598-019-50282-1), 2019-09-25
Supplement: 41598_2019_50282_MOESM5_ESM.pdf [file 41598_2019_50282_MOESM5_ESM.pdf]

## **Analysis of the circadian transcriptome of the Antarctic krill *Euphausia superba***

Alberto Biscontin<sup>1,2,\*</sup>, Paolo Martini<sup>1</sup>, Rodolfo Costa<sup>1</sup>, Achim Kramer<sup>2</sup>, Bettina Meyer<sup>3,4,5</sup>,  
So Kawaguchi<sup>6</sup>, Mathias Teschke<sup>3</sup>, Cristiano De Pittà<sup>1,\*</sup>

<sup>1</sup>Dipartimento di Biologia, Università degli Studi di Padova, Padova, Italy

<sup>2</sup>Laboratory of Chronobiology, Charité Universitätsmedizin Berlin, Berlin, Germany

<sup>3</sup>Section Polar Biological Oceanography, Alfred Wegener Institute Helmholtz Centre for Polar and Marine Research, Bremerhaven, Germany

<sup>4</sup>Institute for Chemistry and Biology of the Marine Environment, Carl von Ossietzky University of Oldenburg, Oldenburg, Germany

<sup>5</sup>Helmholtz Institute for Functional Marine Biodiversity (HIFMB) at the University of Oldenburg, 26111 Oldenburg, Germany

<sup>6</sup>Department of Environment and Heritage, Australian Antarctic Division, Kingston, Tasmania, Australia

\*Corresponding authors:

Cristiano De Pittà, Dipartimento di Biologia, Università degli Studi di Padova, via U. Bassi 58/B 35131 Padova, Italy; Phone: +39-049-8276210; Fax: +39-049-8276209; e-mail address: cristiano.depitta@unipd.it

Alberto Biscontin, Dipartimento di Biologia, Università degli Studi di Padova, via U. Bassi 58/B 35131 Padova, Italy; Phone: +39-049-8276228; Fax: +39-049-8276209; e-mail address: alberto.biscontin@unipd.it

**Supplementary Table 4. List of 428 annotated circadian genes with a sinusoidal expression pattern both in LD and DD.**

Functional annotation with BLAST2GO of circadian genes, identified by RAIN (adjusted *p*-value < 0.05) throughout the 24-hour cycle both in LD and DD, are shown. <sup>#</sup>ID Krill2: accession number of krill master transcriptome  
<sup>1</sup>ID Krill1: accession number of krill diurnal transcriptome 14; <sup>2</sup>Annotation = description of the gene; <sup>3</sup>GO term: gene ontology biological process;  
<sup>4</sup>GO child term: most fitting gene ontology child term to further refine the functional annotation.

| ID krill2                              | ID krill1      | Annotation                                                                                                           | GO Term                         | GO Child Term                     |
|----------------------------------------|----------------|----------------------------------------------------------------------------------------------------------------------|---------------------------------|-----------------------------------|
| <b>Cellular component organization</b> |                |                                                                                                                      |                                 |                                   |
| M93133                                 | isotig03139    | actin [ <i>Crassostrea gigas</i> ]                                                                                   | Cellular component organization | Cytoskeleton organization         |
| N15969                                 |                | actin [ <i>Wuchereria bancrofti</i> ]                                                                                | Cellular component organization | Cytoskeleton organization         |
| E4642                                  |                | beta-1 tubulin [ <i>Spodoptera frugiperda</i> ]                                                                      | Cellular component organization | Cytoskeleton organization         |
| M71966                                 | isotig02534    | beta-tubulin [ <i>Oxymonadida</i> environmental sample]                                                              | Cellular component organization | Cytoskeleton organization         |
| N19790                                 |                | alpha-tubulin (Atub) mRNA, partial cds                                                                               | Cellular component organization | Cytoskeleton organization         |
| M2022                                  |                | cyclic AMP-regulated protein like protein [ <i>Marsupenaeus japonicus</i> ]                                          | Cellular component organization | Cytoskeleton organization         |
| M7549                                  |                | Katanin p80 WD40-containing subunit B1 [ <i>Camponotus floridanus</i> ]                                              | Cellular component organization | Cytoskeleton organization         |
| N27135                                 |                | kinesin 2B [ <i>Nasonia vitripennis</i> ]                                                                            | Cellular component organization | Cytoskeleton organization         |
| N56949                                 | isotig04195    | myosin heavy chain type 2 [ <i>Penaeus monodon</i> ]                                                                 | Cellular component organization | Cytoskeleton organization         |
| M107465                                |                | myosin light chain [ <i>Penaeus monodon</i> ]                                                                        | Cellular component organization | Cytoskeleton organization         |
| M3279                                  |                | <i>Penaeus monodon</i> MYH2 mRNA for myosin heavy chain type 2, complete cds                                         | Cellular component organization | Cytoskeleton organization         |
| M67802                                 |                | <i>Portunus pelagicus</i> actin mRNA, partial cds                                                                    | Cellular component organization | Cytoskeleton organization         |
| N51300                                 |                | PREDICTED: actin-related protein 2-like isoform 1 [ <i>Megachile rotundata</i> ]                                     | Cellular component organization | Cytoskeleton organization         |
| N28458                                 |                | PREDICTED: costars family protein ABRACL-like [ <i>Ciona intestinalis</i> ]                                          | Cellular component organization | Cytoskeleton organization         |
| N45122                                 |                | PREDICTED: filamin-A isoform X3 [ <i>Tribolium castaneum</i> ]                                                       | Cellular component organization | Cytoskeleton organization         |
| N37731                                 |                | PREDICTED: kinesin-like protein unc-104 [ <i>Nasonia vitripennis</i> ]                                               | Cellular component organization | Cytoskeleton organization         |
| N12731                                 | GTJW03E08JUW9R | PREDICTED: LOW QUALITY PROTEIN: myosin-IIIa [ <i>Nasonia vitripennis</i> ]                                           | Cellular component organization | Cytoskeleton organization         |
| M739                                   |                | PREDICTED: microtubule-associated proteins 1A/1B light chain 3C [ <i>Chelonia mydas</i> ]                            | Cellular component organization | Cytoskeleton organization         |
| M110013                                |                | PREDICTED: similar to kakapo [ <i>Tribolium castaneum</i> ]                                                          | Cellular component organization | Cytoskeleton organization         |
| N54541                                 |                | PREDICTED: unconventional myosin-VI [ <i>Trichechus manatus latirostris</i> ]                                        | Cellular component organization | Cytoskeleton organization         |
| N43824                                 |                | PREDICTED: unconventional myosin-VI isoform X1 [ <i>Poecilia formosa</i> ]                                           | Cellular component organization | Cytoskeleton organization         |
| M31074                                 |                | profilin [ <i>Penaeus monodon</i> ]                                                                                  | Cellular component organization | Cytoskeleton organization         |
| M67257                                 |                | putative articularin p60 [ <i>Rimicaris exoculata</i> ]                                                              | Cellular component organization | Cytoskeleton organization         |
| N23331                                 |                | serine/threonine protein phosphatase 4 regulatory subunit [ <i>Ixodes scapularis</i> ]                               | Cellular component organization | Cytoskeleton organization         |
| M42411                                 |                | collagen-binding protein [ <i>Bacteroides cellulosilyticus</i> ]                                                     | Cellular component organization | Extracellular matrix organization |
| M98466                                 |                | EGF-like domain-containing protein [ <i>Polysphondylium pallidum</i> PN500]                                          | Cellular component organization | Extracellular matrix organization |
| N25080                                 |                | PREDICTED: serine-rich adhesin for platelets-like isoform X2 [ <i>Ceratitis capitata</i> ]                           | Cellular component organization | Extracellular matrix organization |
| M44093                                 |                | putative elastin a [ <i>Rimicaris exoculata</i> ]                                                                    | Cellular component organization | Extracellular matrix organization |
| N5133                                  |                | putative elastin a [ <i>Rimicaris exoculata</i> ]                                                                    | Cellular component organization | Extracellular matrix organization |
| N5141                                  |                | putative elastin a [ <i>Rimicaris exoculata</i> ]                                                                    | Cellular component organization | Extracellular matrix organization |
| N20132                                 |                | DOMON domain-containing protein CG14681-like [ <i>Nasonia vitripennis</i> ]                                          | Cellular component organization | Extracellular matrix organization |
| M14810                                 |                | PREDICTED: collagen alpha-5(IV) chain [ <i>Cavia porcellus</i> ]                                                     | Cellular component organization | Extracellular matrix organization |
| <b>Cellular Process</b>                |                |                                                                                                                      |                                 |                                   |
| N20755                                 |                | PREDICTED: <i>Apis mellifera</i> vinculin (Vinc), mRNA                                                               | Cellular Process                | Cell adhesion                     |
| M88841                                 |                | PREDICTED: protocadherin Fat 1 isoform X5 [ <i>Xenopus (Silurana) tropicalis</i> ]                                   | Cellular Process                | Cell adhesion                     |
| N14119                                 | isotig07477    | BCS-2 [ <i>Amphibalanus amphitrite</i> ]                                                                             | Cellular Process                | Cell cycle                        |
| N19844                                 |                | cyclin G-like protein [ <i>Daphnia pulex</i> ]                                                                       | Cellular Process                | Cell cycle                        |
| M99237                                 |                | mitotic spindle-associated MMXD complex subunit MIP18 [ <i>Chinchilla lanigera</i> ]                                 | Cellular Process                | Cell cycle                        |
| N19234                                 |                | PREDICTED: origin recognition complex subunit 4 [ <i>Sorex araneus</i> ]                                             | Cellular Process                | Cell cycle                        |
| N22167                                 |                | PREDICTED: <i>Saccoglossus kowalevskii</i> mps one binder kinase activator-like 3-like                               | Cellular Process                | Cell cycle                        |
| N18757                                 |                | PREDICTED: dnaJ homolog subfamily C member 2-like [ <i>Pundamilia nyererei</i> ]                                     | Cellular Process                | Cell cycle regulation             |
| M70056                                 |                | Inhibitor of growth protein 1 [ <i>Camponotus floridanus</i> ]                                                       | Cellular Process                | Cell death                        |
| M61577                                 |                | PREDICTED: programmed cell death protein 2-like [ <i>Nasonia vitripennis</i> ]                                       | Cellular Process                | Cell death                        |
| N24494                                 |                | PREDICTED: YLP motif-containing protein 1 [ <i>Xenopus (Silurana) tropicalis</i> ]                                   | Cellular Process                | Cell differentiation              |
| N52462                                 |                | inhibitor of apoptosis protein [ <i>Litopenaeus vannamei</i> ]                                                       | Cellular Process                | Cell proliferation                |
| N40192                                 |                | inhibitor of apoptosis protein [ <i>Penaeus monodon</i> ]                                                            | Cellular Process                | Cell proliferation                |
| N12719                                 |                | PREDICTED: similar to dre4 CG1828-PA [ <i>Tribolium castaneum</i> ]                                                  | Cellular Process                | Cell proliferation                |
| <b>Developmental process</b>           |                |                                                                                                                      |                                 |                                   |
| M85184                                 |                | PREDICTED: titin-like isoform X1 [ <i>Apis mellifera</i> ]                                                           | Developmental process           | Muscle structure development      |
| N18069                                 |                | projectin [ <i>Procambarus clarkii</i> ]                                                                             | Developmental process           | Muscle structure development      |
| M11868                                 |                | PREDICTED: alpha/beta hydrolase domain-containing protein 14A [ <i>Gallus gallus</i> ]                               | Developmental process           | Nervous system development        |
| M378                                   |                | similar to receptor-type tyrosine-protein phosphatase N2 [ <i>Tribolium castaneum</i> ]                              | Developmental process           | Nervous system development        |
| M11462                                 |                | ankyrin repeat protein [ <i>Trichomonas vaginalis</i> G3]                                                            | Developmental process           | Nervous system development        |
| M14333                                 |                | ankyrin repeat protein [ <i>Trichomonas vaginalis</i> G3]                                                            | Developmental process           | Nervous system development        |
| N52096                                 |                | innexin 2 [ <i>Penaeus monodon</i> ]                                                                                 | Developmental process           | Nervous system development        |
| M3501                                  |                | innexin inx1 [ <i>Homarus gammarus</i> ]                                                                             | Developmental process           | Nervous system development        |
| M64411                                 |                | LIM class homeobox transcription factor Lmx [ <i>Mnemiopsis leidyi</i> ]                                             | Developmental process           | Nervous system development        |
| N36400                                 |                | Microtubule-associated protein futsch [ <i>Cerapachys biroi</i> ]                                                    | Developmental process           | Nervous system development        |
| M5443                                  |                | <i>Pediculus humanus corporis</i> protein Mo25, putative, mRNA                                                       | Developmental process           | Nervous system development        |
| M65366                                 |                | Pogo transposable element with KRAB domain [ <i>Crassostrea gigas</i> ]                                              | Developmental process           | Nervous system development        |
| N4801                                  | isotig00687    | PREDICTED: calphotin-like [ <i>Acyrthosiphon pisum</i> ]                                                             | Developmental process           | Nervous system development        |
| N42326                                 |                | PREDICTED: COP9 signalosome complex subunit 3 [ <i>Ornithorhynchus anatinus</i> ]                                    | Developmental process           | Nervous system development        |
| N39388                                 |                | PREDICTED: similar to serine proteinase stubble [ <i>Tribolium castaneum</i> ]                                       | Developmental process           | Nervous system development        |
| M65029                                 |                | Segmentation protein cap'n'collar [ <i>Harpegnathos saltator</i> ]                                                   | Developmental process           | Nervous system development        |
| N35583                                 |                | SpAN-like protein [ <i>Rimicaris exoculata</i> ]                                                                     | Developmental process           | Nervous system development        |
| N22265                                 |                | src tyrosine kinase, putative [ <i>Ixodes scapularis</i> ]                                                           | Developmental process           | Nervous system development        |
| <b>Metabolic process</b>               |                |                                                                                                                      |                                 |                                   |
| M108370                                |                | <i>Oplophorus luciferin</i> 2-monoxygenase non-catalytic subunit [ <i>Oplophorus gracilirostris</i> ]                | Metabolic process               | Bioluminescence                   |
| M73149                                 |                | Acid sphingomyelinase-like phosphodiesterase 3b, partial [ <i>Ophiophagus hannah</i> ]                               | Metabolic process               | Carbohydrate metabolic process    |
| N39090                                 |                | Beta-1,4-galactosyltransferase 3 [ <i>Chelonia mydas</i> ]                                                           | Metabolic process               | Carbohydrate metabolic process    |
| N23226                                 |                | Carbohydrate sulfotransferase 14 [ <i>Camponotus floridanus</i> ]                                                    | Metabolic process               | Carbohydrate metabolic process    |
| M12607                                 |                | chitinase 2 [ <i>Penaeus monodon</i> ]                                                                               | Metabolic process               | Carbohydrate metabolic process    |
| M60556                                 |                | galactoside 2-alpha-L-fucosyltransferase 2-like [ <i>Odobenus rosmarus divergens</i> ]                               | Metabolic process               | Carbohydrate metabolic process    |
| M18847                                 | isotig06097    | sp Q7C3R3 XYLA_ENTFA Xylose isomerase OS=Enterococcus faecalis GN=xyIA PE=3 SV=1                                     | Metabolic process               | Carbohydrate metabolic process    |
| M16697                                 |                | i-type lysozyme-like protein 2 [ <i>Penaeus monodon</i> ]                                                            | Metabolic process               | Carbohydrate metabolic process    |
| N9218                                  |                | i-type lysozyme-like protein 2 [ <i>Penaeus monodon</i> ]                                                            | Metabolic process               | Carbohydrate metabolic process    |
| M17683                                 |                | n-acetylgalactosaminyltransferase [ <i>Aedes aegypti</i> ]                                                           | Metabolic process               | Carbohydrate metabolic process    |
| E4652                                  |                | PREDICTED: beta-1,4-mannosyl-glycoprotein 4-beta-N-acetylglucosaminyltransferase [ <i>Ornithorhynchus anatinus</i> ] | Metabolic process               | Carbohydrate metabolic process    |
| N22117                                 |                | PREDICTED: xylose isomerase-like [ <i>Strongylocentrotus purpuratus</i> ]                                            | Metabolic process               | Carbohydrate metabolic process    |
| M17951                                 | GTJW03E08JCXIH | PREDICTED: glycogen debranching enzyme-like [ <i>Nasonia vitripennis</i> ]                                           | Metabolic process               | Carbohydrate metabolic process    |
| N23374                                 | isotig06708    | PREDICTED: xylose isomerase [ <i>Ciona intestinalis</i> ]                                                            | Metabolic process               | Carbohydrate metabolic process    |

| ID krill2                      | ID krill1      | Annotation                                                                                                                                       | GO Term                 | GO Child Term                      |
|--------------------------------|----------------|--------------------------------------------------------------------------------------------------------------------------------------------------|-------------------------|------------------------------------|
| N13131                         |                | PREDICTED: xylose isomerase-like [Amphimedon queenslandica]                                                                                      | Metabolic process       | Carbohydrate metabolic process     |
| M108205                        |                | PREDICTED: xylose isomerase-like [Aplysia californica]                                                                                           | Metabolic process       | Carbohydrate metabolic process     |
| M19131                         | isotig07272    | PREDICTED: xylose isomerase-like [Takifugu rubripes]                                                                                             | Metabolic process       | Carbohydrate metabolic process     |
| M23222                         | isotig07191    | PREDICTED: xylose isomerase-like [Takifugu rubripes]                                                                                             | Metabolic process       | Carbohydrate metabolic process     |
| M4573                          | isotig08459    | PREDICTED: xylose isomerase-like [Takifugu rubripes]                                                                                             | Metabolic process       | Carbohydrate metabolic process     |
| N13357                         |                | PREDICTED: xylose isomerase-like [Takifugu rubripes]                                                                                             | Metabolic process       | Carbohydrate metabolic process     |
| N12995                         |                | PREDICTED: xylose isomerase-like isoform X1 [Oreochromis niloticus]                                                                              | Metabolic process       | Carbohydrate metabolic process     |
| M2029                          | FW09YNP01CT3PY | putative glycogen synthase [Daphnia pulex]                                                                                                       | Metabolic process       | Carbohydrate metabolic process     |
| N55506                         |                | 4-aminobutyrate aminotransferase [Aedes aegypti]                                                                                                 | Metabolic process       | Cellular amino acid metabolic proc |
| M109440                        |                | Asparaginyl-tRNA synthetase, isoform A [Drosophila melanogaster]                                                                                 | Metabolic process       | Cellular amino acid metabolic proc |
| M3130                          |                | Fumarylacetoacetase [Crassostrea gigas]                                                                                                          | Metabolic process       | Cellular amino acid metabolic proc |
| N52993                         | isotig10007    | glutamine synthetase [Fenneropenaeus chinensis]                                                                                                  | Metabolic process       | Cellular amino acid metabolic proc |
| M93328                         |                | glycine decarboxylase (predicted), isoform CRA_d [Rattus norvegicus]                                                                             | Metabolic process       | Cellular amino acid metabolic proc |
| N14451                         |                | hematopoietic prostaglandin D synthase [Penaeus monodon]                                                                                         | Metabolic process       | Cellular amino acid metabolic proc |
| M545                           |                | kynurenine 3-monooxygenase [Capsaspora owczarzaki ATCC 30864]                                                                                    | Metabolic process       | Cellular amino acid metabolic proc |
| M56721                         |                | L-aspartate dehydrogenase [Caligus clemensi]                                                                                                     | Metabolic process       | Cellular amino acid metabolic proc |
| M4562                          |                | methylcrotonoyl-CoA carboxylase beta chain, mitochondrial [Oreochromis niloticus]                                                                | Metabolic process       | Cellular amino acid metabolic proc |
| N18403                         |                | Ornithine aminotransferase, mitochondrial [Acromyrmex echinator]                                                                                 | Metabolic process       | Cellular amino acid metabolic proc |
| M4015                          |                | PREDICTED: adenosylhomocysteinase A-like [Strongylocentrotus purpuratus]                                                                         | Metabolic process       | Cellular amino acid metabolic proc |
| N19992                         |                | PREDICTED: arginase-1-like [Loxodonta africana]                                                                                                  | Metabolic process       | Cellular amino acid metabolic proc |
| N19820                         |                | PREDICTED: threonine synthase-like 2 [Callorhinchus milii]                                                                                       | Metabolic process       | Cellular amino acid metabolic proc |
| M87594                         |                | PREDICTED: tryptophan 2,3-dioxygenase [Nomascus leucogenys]                                                                                      | Metabolic process       | Cellular amino acid metabolic proc |
| M7047                          |                | Prolyl 4-hydroxylase subunit alpha-1 [Crassostrea gigas]                                                                                         | Metabolic process       | Cellular amino acid metabolic proc |
| M63222                         |                | sarcosine dehydrogenase, mitochondrial-like [Strongylocentrotus purpuratus]                                                                      | Metabolic process       | Cellular amino acid metabolic proc |
| M4050                          |                | putative Collagen alpha-1V chain [Danaus plexippus]                                                                                              | Metabolic process       | Chitin metabolic process           |
| M78726                         | contig03755    | cytochrome c oxidase subunit I, partial (mitochondrion) [Neopetrolisthes maculatus]                                                              | Metabolic process       | Generation of precursor metabolit  |
| N31394                         |                | cytochrome c oxidase subunit VIIA putative [Scylla paramamosain]                                                                                 | Metabolic process       | Generation of precursor metabolit  |
| M99429                         | contig03831    | Euphausia superba isolate I241 cytochrome c oxidase subunit I (COI) and NADH dehydrogenase subunit 1 (ND1) genes, partial cds; mitochondrial     | Metabolic process       | Generation of precursor metabolit  |
| M113051                        |                | Euphausia superba voucher 760M mitochondrion, partial genome                                                                                     | Metabolic process       | Generation of precursor metabolit  |
| M14565                         |                | mitochondrial ATP synthase gamma subunit precursor [Litopenaeus vannamei]                                                                        | Metabolic process       | Generation of precursor metabolit  |
| N33931                         |                | NADH dehydrogenase [ubiquinone] 1 subunit C2-like [Musca domestica]                                                                              | Metabolic process       | Generation of precursor metabolit  |
| N14105                         |                | NADH-ubiquinone oxidoreductase 20 kDa subunit, mitochondrial precursor, mRNA [Candida tropicalis]                                                | Metabolic process       | Generation of precursor metabolit  |
| M68114                         |                | PREDICTED: similar to mitochondrial NADH:ubiquinone oxidoreductase ESSS subunit, putative [Tribolium castaneum]                                  | Metabolic process       | Generation of precursor metabolit  |
| N29097                         | FW09YNP02I2TOO | Acetyl-CoA carboxylase [Camponotus floridanus]                                                                                                   | Metabolic process       | Lipid metabolic process            |
| N12285                         |                | hematopoietic prostaglandin D synthase [Penaeus monodon]                                                                                         | Metabolic process       | Lipid metabolic process            |
| M1878                          |                | Homo sapiens peroxisomal D3,D2-enoyl-CoA isomerase [synthetic construct]                                                                         | Metabolic process       | Lipid metabolic process            |
| M86465                         |                | PREDICTED: galactose-3-O-sulfotransferase 1-like [Saccoglossus kowalevskii]                                                                      | Metabolic process       | Lipid metabolic process            |
| N9420                          |                | PREDICTED: probable serine incorporator-like [Nasonia vitripennis]                                                                               | Metabolic process       | Lipid metabolic process            |
| M32708                         |                | putative triacylglycerol lipase [Daphnia pulex]                                                                                                  | Metabolic process       | Lipid metabolic process            |
| M5901                          |                | triacylglycerol lipase [Litopenaeus vannamei]                                                                                                    | Metabolic process       | Lipid metabolic process            |
| N36501                         |                | triacylglycerol lipase [Litopenaeus vannamei]                                                                                                    | Metabolic process       | Lipid metabolic process            |
| M94914                         |                | glycosyl-phosphatidylinositol-linked carbonic anhydrase [Litopenaeus vannamei]                                                                   | Metabolic process       | Nitrogen compound metabolic proc   |
| N18959                         |                | exonuclease 3'-5' domain containing 2 [Xenopus laevis]                                                                                           | Metabolic process       | Nucleobase-containing compound     |
| N20569                         |                | glycinamide ribonucleotide synthetase-aminimidazole ribonucleotide synthetase-glycinamide ribonucleotide transformylase [Branchiostoma belcheri] | Metabolic process       | Nucleobase-containing compound     |
| N29027                         |                | PREDICTED: guanine deaminase [Ficedula albicollis]                                                                                               | Metabolic process       | Nucleobase-containing compound     |
| M56865                         |                | PREDICTED: inosine-5'-monophosphate dehydrogenase isoform 1 [Apis mellifera]                                                                     | Metabolic process       | Nucleobase-containing compound     |
| N21697                         |                | PREDICTED: probable queuine tRNA-ribosyltransferase [Acyrtosiphon pisum]                                                                         | Metabolic process       | Nucleobase-containing compound     |
| M3981                          |                | PREDICTED: similar to adenine phosphoribosyltransferase [Tribolium castaneum]                                                                    | Metabolic process       | Nucleobase-containing compound     |
| M78121                         |                | PREDICTED: similar to ribosomal pseudouridine synthase [Tribolium castaneum]                                                                     | Metabolic process       | Nucleobase-containing compound     |
| N46564                         |                | PREDICTED: xanthine dehydrogenase/oxidase [Danio rerio]                                                                                          | Metabolic process       | Nucleobase-containing compound     |
| N24180                         |                | UDP-glucose 4-epimerase [Zootermopsis nevadensis]                                                                                                | Metabolic process       | Nucleobase-containing compound     |
| N21406                         |                | cytochrome P450 [Bemisia tabaci]                                                                                                                 | Metabolic process       | Oxidation-reduction process        |
| M62474                         |                | cytochrome P450 [Litopenaeus vannamei]                                                                                                           | Metabolic process       | Oxidation-reduction process        |
| M57279                         |                | dehydrogenase/reductase SDR family member 11 [Pseudopodoces humilis]                                                                             | Metabolic process       | Oxidation-reduction process        |
| E3651                          |                | extracellular superoxide dismutase precursor [Pacifastacus leniusculus]                                                                          | Metabolic process       | Oxidation-reduction process        |
| M13711                         |                | extracellular superoxide dismutase precursor [Pacifastacus leniusculus]                                                                          | Metabolic process       | Oxidation-reduction process        |
| N26026                         |                | Laccase-4 [Acromyrmex echinator]                                                                                                                 | Metabolic process       | Oxidation-reduction process        |
| N21156                         |                | peptidylglycine alpha-amidating monooxygenase [Conus bullatus]                                                                                   | Metabolic process       | Oxidation-reduction process        |
| N19275                         |                | saccharopine dehydrogenase-like oxidoreductase-like [Saccoglossus kowalevskii]                                                                   | Metabolic process       | Oxidation-reduction process        |
| N21510                         |                | senecionine N-oxygenase, putative [Pedicularis humanus corporis]                                                                                 | Metabolic process       | Oxidation-reduction process        |
| M4594                          |                | thioredoxin [Ruditapes philippinarum]                                                                                                            | Metabolic process       | Oxidation-reduction process        |
| M9529                          |                | unspecific monooxygenase [Brugia malayi]                                                                                                         | Metabolic process       | Oxidation-reduction process        |
| N21023                         |                | dihydroflavonol 4-reductase [alpha proteobacterium SCGC AAA536-K22]                                                                              | Metabolic process       | Pigment                            |
| M75421                         |                | PREDICTED: LYR motif-containing protein 4B-like [Oreochromis niloticus]                                                                          | Metabolic process       | Small molecule metabolic process   |
| N20470                         |                | 1-acyl-sn-glycerol-3-phosphate acyltransferase gamma-like [Nasonia vitripennis]                                                                  | Metabolic process       |                                    |
| M104013                        |                | adenyllyl cyclase [Daphnia pulex]                                                                                                                | Metabolic process       |                                    |
| M4820                          |                | carboxylesterase [Laodelphax striatella]                                                                                                         | Metabolic process       |                                    |
| M586                           |                | Cytosolic Fe-S cluster assembly factor NUBP1-like protein [Crassostrea gigas]                                                                    | Metabolic process       |                                    |
| E1475                          |                | guanine nucleotide-binding protein, putative [Ixodes scapularis]                                                                                 | Metabolic process       |                                    |
| N38779                         |                | PREDICTED: abhydrolase domain-containing protein 3-like [Bombus impatiens]                                                                       | Metabolic process       |                                    |
| N45146                         |                | PREDICTED: allantoinase, mitochondrial-like [Ornithorhynchus anatinus]                                                                           | Metabolic process       |                                    |
| N23265                         |                | PREDICTED: arylamine N-acetyltransferase 3-like [Microtus ochrogaster]                                                                           | Metabolic process       |                                    |
| N7968                          |                | PREDICTED: Caenorhabditis Epoxide Hydrolase family member (ceeh-1)-like [Saccoglossus kowalevskii]                                               | Metabolic process       |                                    |
| N20506                         |                | PREDICTED: estrogen sulfotransferase-like [Apis mellifera]                                                                                       | Metabolic process       |                                    |
| N41594                         |                | PREDICTED: GDP-L-fucose synthase-like [Aplysia californica]                                                                                      | Metabolic process       |                                    |
| M65988                         |                | PREDICTED: SET and MYND domain-containing protein 4-like [Nasonia vitripennis]                                                                   | Metabolic process       |                                    |
| M4676                          |                | SEL-1, putative [Ixodes scapularis]                                                                                                              | Metabolic process       |                                    |
| N32142                         |                | tRNA 2-thiocytidine biosynthesis protein ttcA [Lepeophtheirus salmonis]                                                                          | Metabolic process       |                                    |
| <b>Nucleic acid metabolism</b> |                |                                                                                                                                                  |                         |                                    |
| M102205                        |                | DNA topoisomerase 3-alpha [Crassostrea gigas]                                                                                                    | Nucleic acid metabolism | DNA metabolism                     |
| N27019                         |                | PREDICTED: origin recognition complex, subunit 1-like [Saccoglossus kowalevskii]                                                                 | Nucleic acid metabolism | DNA replication                    |
| N27095                         |                | PREDICTED: DNA polymerase epsilon subunit 3 isoform X1 [Chrysemys picta bellii]                                                                  | Nucleic acid metabolism | DNA replication                    |
| M108155                        |                | PREDICTED: protein misato-like isoform X1 [Musca domestica]                                                                                      | Nucleic acid metabolism | DNA replication                    |
| N38408                         |                | ankyrin repeat domain-containing protein 49-like [Acyrtosiphon pisum]                                                                            | Nucleic acid metabolism | Regulation of gene expression      |

| ID krill2 | ID krill1      | Annotation                                                                                       | GO Term                 | GO Child Term                      |
|-----------|----------------|--------------------------------------------------------------------------------------------------|-------------------------|------------------------------------|
| M335      |                | DEAD box ATP-dependent RNA helicase, putative [Pediculus humanus corporis]                       | Nucleic acid metabolism | Regulation of gene expression      |
| M72608    |                | Elongator complex protein 1 [Crassostrea gigas]                                                  | Nucleic acid metabolism | Regulation of gene expression      |
| N53807    |                | ETS factor [Trichinella spiralis]                                                                | Nucleic acid metabolism | Regulation of gene expression      |
| M66385    |                | GDNF-inducible zinc finger protein 1-like isoform X1 [Callorhinchus milii]                       | Nucleic acid metabolism | Regulation of gene expression      |
| N18441    |                | PREDICTED: ets DNA-binding protein pokkuri-like [Nasonia vitripennis]                            | Nucleic acid metabolism | Regulation of gene expression      |
| N53342    |                | PREDICTED: gastrula zinc finger protein XICGF57.1-like, partial [Danio rerio]                    | Nucleic acid metabolism | Regulation of gene expression      |
| M1844     |                | PREDICTED: mediator of RNA polymerase II transcription subunit 8 isoform 2 [Nasonia vitripennis] | Nucleic acid metabolism | Regulation of gene expression      |
| N61781    |                | PREDICTED: protein charlatan-like isoform X1 [Ceratitis capitata]                                | Nucleic acid metabolism | Regulation of gene expression      |
| N22415    |                | PREDICTED: transcription elongation factor SPT5-like [Megachile rotundata]                       | Nucleic acid metabolism | Regulation of gene expression      |
| N23604    |                | PREDICTED: zinc finger protein 235 [Trichechus manatus latirostris]                              | Nucleic acid metabolism | Regulation of gene expression      |
| M97076    |                | PREDICTED: zinc finger protein 287-like [Monodelphis domestica]                                  | Nucleic acid metabolism | Regulation of gene expression      |
| N31716    |                | PREDICTED: zinc finger protein 347-like [Saccoglossus kowalevskii]                               | Nucleic acid metabolism | Regulation of gene expression      |
| N30244    |                | PREDICTED: zinc finger protein 484-like [Metaseiulus occidentalis]                               | Nucleic acid metabolism | Regulation of gene expression      |
| N46801    |                | PREDICTED: zinc finger protein 528-like [Pongo abelii]                                           | Nucleic acid metabolism | Regulation of gene expression      |
| M77892    | FW09YNP02IAVCY | PREDICTED: zinc finger protein 570-like [Elephantulus edwardii]                                  | Nucleic acid metabolism | Regulation of gene expression      |
| M12728    |                | PREDICTED: zinc finger protein 596-like [Chrysochloris asiatica]                                 | Nucleic acid metabolism | Regulation of gene expression      |
| M58041    |                | PREDICTED: zinc finger protein 658-like isoform X2 [Neolamprologus brichardi]                    | Nucleic acid metabolism | Regulation of gene expression      |
| N44929    |                | PREDICTED: zinc finger protein 845-like [Acyrtosiphon pisum]                                     | Nucleic acid metabolism | Regulation of gene expression      |
| N16123    |                | PREDICTED: zinc finger protein 84-like [Strongylocentrotus purpuratus]                           | Nucleic acid metabolism | Regulation of gene expression      |
| N15523    |                | putative general transcription factor IIIC polypeptide 5 [Platynereis dumerilii]                 | Nucleic acid metabolism | Regulation of gene expression      |
| M41234    | isotig00290    | Spz1 [Litopenaeus vannamei]                                                                      | Nucleic acid metabolism | Regulation of gene expression      |
| N38517    |                | transcription initiation factor TFIID subunit 4-like [Metaseiulus occidentalis]                  | Nucleic acid metabolism | Regulation of gene expression      |
| M5558     |                | zinc finger protein [Daphnia pulex]                                                              | Nucleic acid metabolism | Regulation of gene expression      |
| M6056     |                | Zinc finger protein 2 like protein [Myotis brandtii]                                             | Nucleic acid metabolism | Regulation of gene expression      |
| N37797    |                | zinc finger protein 516 [Danio rerio]                                                            | Nucleic acid metabolism | Regulation of gene expression      |
| M27180    |                | zinc finger protein CCCH domain-containing protein [Pediculus humanus corporis]                  | Nucleic acid metabolism | Regulation of gene expression      |
| M9826     |                | zinc finger protein, partial [Cricetulus griseus]                                                | Nucleic acid metabolism | Regulation of gene expression      |
| M60094    |                | Zinc finger Y-chromosomal protein 1 [Xenopus laevis]                                             | Nucleic acid metabolism | Regulation of gene expression      |
| M114291   |                | Anaspides tasmaniae internal transcribed spacer 2 and 28S ribosomal RNA gene                     | Nucleic acid metabolism | Regulation of gene expression, epi |
| N10420    |                | Chromatin accessibility complex protein 1 [Acromyrmex echinator]                                 | Nucleic acid metabolism | Regulation of gene expression, epi |
| N20627    |                | histone-lysine N-methyltransferase E(z) isoform 2 [Nasonia vitripennis]                          | Nucleic acid metabolism | Regulation of gene expression, epi |
| N31827    |                | PREDICTED: protein Gawky isoform X5 [Tribolium castaneum]                                        | Nucleic acid metabolism | Regulation of gene expression, epi |
| N19248    | FW09YNP01EBAIE | putative DNA-mediated transposase [Helicoverpa zea]                                              | Nucleic acid metabolism | Regulation of gene expression, epi |
| N22228    |                | Exosome complex exonuclease RRP4, partial [Anas platyrhynchos]                                   | Nucleic acid metabolism | Ribosome biogenesis                |
| N34355    |                | heterogeneous nuclear ribonucleoprotein 87F-like [Acyrtosiphon pisum]                            | Nucleic acid metabolism | RNA metabolic process              |
| N18387    |                | 7SK snRNA methylphosphate capping enzyme-like [Megachile rotundata]                              | Nucleic acid metabolism | RNA metabolic process              |
| N53285    |                | heat containing protein, putative [Pediculus humanus corporis]                                   | Nucleic acid metabolism | RNA metabolic process              |
| N42821    |                | Heterogeneous nuclear ribonucleoprotein A1 [Pediculus humanus corporis]                          | Nucleic acid metabolism | RNA metabolic process              |
| M60095    |                | PAB-dependent poly(A)-specific ribonuclease subunit 2-like [Meleagris gallopavo]                 | Nucleic acid metabolism | RNA metabolic process              |
| M74785    |                | PREDICTED: 5'-3' exoribonuclease 2 homolog [Ceratitis capitata]                                  | Nucleic acid metabolism | RNA metabolic process              |
| N28294    |                | PREDICTED: LOW QUALITY PROTEIN: integrator complex subunit 1 [Equus caballus]                    | Nucleic acid metabolism | RNA metabolic process              |
| M4435     |                | PREDICTED: probable methyltransferase TARBP1-like [Aplysia californica]                          | Nucleic acid metabolism | RNA metabolic process              |
| N19703    |                | PREDICTED: protein SMG9-like [Astyanax mexicanus]                                                | Nucleic acid metabolism | RNA metabolic process              |
| N23732    |                | PREDICTED: RNA polymerase II-associated protein 3-like [Ciona intestinalis]                      | Nucleic acid metabolism | RNA metabolic process              |
| N26749    |                | PREDICTED: serine/threonine-protein kinase SMG1-like [Astyanax mexicanus]                        | Nucleic acid metabolism | RNA metabolic process              |
| M64830    |                | PREDICTED: similar to spliceosome associated protein [Tribolium castaneum]                       | Nucleic acid metabolism | RNA metabolic process              |
| N27405    |                | PREDICTED: uracil phosphoribosyltransferase homolog [Nasonia vitripennis]                        | Nucleic acid metabolism | RNA metabolic process              |
| M77998    |                | reverse transcriptase [Daphnia pulex]                                                            | Nucleic acid metabolism | RNA metabolic process              |
| N23581    |                | serine/arginine repetitive matrix protein 2-like isoform X1 [Apis dorsata]                       | Nucleic acid metabolism | RNA metabolic process              |
| N8789     |                | small nuclear ribonucleoprotein polypeptide G [Penaeus monodon]                                  | Nucleic acid metabolism | RNA metabolic process              |
| M5713     |                | splicing factor 3B subunit 1 [Trichinella spiralis]                                              | Nucleic acid metabolism | RNA metabolic process              |
| N21123    |                | DNA-directed RNA polymerase 1 subunit RPA43-like [Nasonia vitripennis]                           | Nucleic acid metabolism | Transcription, DNA-dependent       |
| N25855    |                | Lymphoid-specific helicase [Pteropus alecto]                                                     | Nucleic acid metabolism |                                    |

## Protein metabolism

|        |               |                                                                                                 |                    |                                    |
|--------|---------------|-------------------------------------------------------------------------------------------------|--------------------|------------------------------------|
| N15593 |               | valacyclovir hydrolase [Anopheles darlingi]                                                     | Protein metabolism | Cellular amino acid metabolic proc |
| N18288 |               | casein kinase 1 epsilon [Eurydice pulchra]                                                      | Protein metabolism | Cellular protein modification proc |
| N13007 |               | checkpoint kinase 1 [Daphnia pulex]                                                             | Protein metabolism | Cellular protein modification proc |
| M66217 |               | Diphthamide biosynthesis protein 2 [Dicentrarchus labrax]                                       | Protein metabolism | Cellular protein modification proc |
| N9476  |               | dolichyl-diphosphooligosaccharide--protein glycosyltransferase subunit STT3A [Poecilia formosa] | Protein metabolism | Cellular protein modification proc |
| N11830 | GTJW03E08JXIL | hemocyte protein-glutamine gamma-glutamyltransferase-like [Bombyx mori]                         | Protein metabolism | Cellular protein modification proc |
| M8985  |               | polypeptide N-acetylgalactosaminyltransferase 5-like [Megachile rotundata]                      | Protein metabolism | Cellular protein modification proc |
| M22298 |               | PREDICTED: 14 kDa phosphohistidine phosphatase [Octodon degus]                                  | Protein metabolism | Cellular protein modification proc |
| M85248 |               | PREDICTED: glutaminyl-peptide cyclotransferase-like [Bombyx mori]                               | Protein metabolism | Cellular protein modification proc |
| M9982  |               | PREDICTED: probable leucine--tRNA ligase, mitochondrial-like [Musca domestica]                  | Protein metabolism | Cellular protein modification proc |
| N33379 |               | PREDICTED: similar to Nedd4 CG7555-PC [Tribolium castaneum]                                     | Protein metabolism | Cellular protein modification proc |
| N34569 |               | PREDICTED: tyrosine-protein kinase Fer [Sorex araneus]                                          | Protein metabolism | Cellular protein modification proc |
| M61171 |               | Protein FAM76A [Crassostrea gigas]                                                              | Protein metabolism | Cellular protein modification proc |
| M9345  |               | protein kinase, putative [Ixodes scapularis]                                                    | Protein metabolism | Cellular protein modification proc |
| M59923 |               | RpeA [Escherichia coli]                                                                         | Protein metabolism | Cellular protein modification proc |
| N20761 |               | serine/threonine protein kinase rio3, putative [Ixodes scapularis]                              | Protein metabolism | Cellular protein modification proc |
| N18522 |               | upstream regulatory element binding protein 1 [Homo sapiens]                                    | Protein metabolism | Cellular protein modification proc |
| M21622 |               | 15 kDa selenoprotein precursor, putative [Pediculus humanus corporis]                           | Protein metabolism | Protein folding                    |
| M60404 |               | BCS-1 [Amphibalanus amphitrite]                                                                 | Protein metabolism | Protein folding                    |
| M74663 |               | BCS-1 [Amphibalanus amphitrite]                                                                 | Protein metabolism | Protein folding                    |
| M65353 | isotig05545   | related to FPR2-FK506/rapamycin-binding protein of the ER [Ustilago hordei]                     | Protein metabolism | Protein folding                    |
| N10435 |               | Aminopeptidase N precursor, putative [Pediculus humanus corporis]                               | Protein metabolism | Proteolysis                        |
| M9318  |               | anaphase-promoting complex subunit, putative [Pediculus humanus corporis]                       | Protein metabolism | Proteolysis                        |
| N17787 |               | caspase-3 [Culex quinquefasciatus]                                                              | Protein metabolism | Proteolysis                        |
| M4677  |               | CLIP-domain serine protease subfamily A [Anopheles darlingi]                                    | Protein metabolism | Proteolysis                        |
| M47110 |               | collagenolytic serine protease [Paralithodes camtschaticus]                                     | Protein metabolism | Proteolysis                        |
| M18434 |               | CUB-serine protease [Panulirus argus]                                                           | Protein metabolism | Proteolysis                        |
| M19739 |               | CUB-serine protease [Panulirus argus]                                                           | Protein metabolism | Proteolysis                        |
| M3619  |               | CUB-serine protease [Panulirus argus]                                                           | Protein metabolism | Proteolysis                        |
| N11966 |               | Cytosolic non-specific dipeptidase [Lepeophtheirus salmonis]                                    | Protein metabolism | Proteolysis                        |

| ID krill2                  | ID krill1      | Annotation                                                                                              | GO Term             | GO Child Term                          |
|----------------------------|----------------|---------------------------------------------------------------------------------------------------------|---------------------|----------------------------------------|
| M72842                     |                | ER degradation-enhancing alpha-mannosidase-like 3 [Harpegnathos saltator]                               | Protein metabolism  | Proteolysis                            |
| M92858                     |                | F-box/WD repeat-containing protein 11 [Xiphophorus maculatus]                                           | Protein metabolism  | Proteolysis                            |
| N50173                     |                | Kazal-type serine proteinase inhibitor 1 [Fenneropenaeus chinensis]                                     | Protein metabolism  | Proteolysis                            |
| M75323                     |                | matrix metalloproteinase 1, isoform C [Drosophila melanogaster]                                         | Protein metabolism  | Proteolysis                            |
| N40575                     |                | PREDICTED: transmembrane protease serine 9-like [Monodelphis domestica]                                 | Protein metabolism  | Proteolysis                            |
| N30906                     |                | PREDICTED: arginyl-tRNA--protein transferase 1-like [Neolamprologus brichardi]                          | Protein metabolism  | Proteolysis                            |
| N10456                     |                | PREDICTED: carboxypeptidase B-like [Apis florea]                                                        | Protein metabolism  | Proteolysis                            |
| N12001                     |                | PREDICTED: cullin-4B-like [Nasonia vitripennis]                                                         | Protein metabolism  | Proteolysis                            |
| N19946                     |                | PREDICTED: E3 ubiquitin-protein ligase HUWE1 isoform X1 [Capra hircus]                                  | Protein metabolism  | Proteolysis                            |
| N25505                     |                | PREDICTED: E3 ubiquitin-protein ligase RNF123 [Otolemur garnettii]                                      | Protein metabolism  | Proteolysis                            |
| M70591                     |                | PREDICTED: E3 ubiquitin-protein ligase TRIM33-like isoform X4 [Ceratitis capitata]                      | Protein metabolism  | Proteolysis                            |
| M1163                      |                | PREDICTED: ubiquitin-conjugating enzyme E2 C-like [Nasonia vitripennis]                                 | Protein metabolism  | Proteolysis                            |
| M56909                     |                | PREDICTED: ubiquitin-conjugating enzyme E2 H-like [Bombus terrestris]                                   | Protein metabolism  | Proteolysis                            |
| M931                       |                | protease [Homarus americanus]                                                                           | Protein metabolism  | Proteolysis                            |
| M97028                     |                | Protein CBR-NAS-4 [Caenorhabditis briggsae]                                                             | Protein metabolism  | Proteolysis                            |
| M3294                      |                | putative chymotrypsin precursor-1 protein [Daphnia pulex]                                               | Protein metabolism  | Proteolysis                            |
| N15033                     |                | RING finger protein 180 [Danio rerio]                                                                   | Protein metabolism  | Proteolysis                            |
| M229                       |                | serine protease [Anopheles darlingi]                                                                    | Protein metabolism  | Proteolysis                            |
| M69725                     |                | serpin 8 [Branchiostoma lanceolatum]                                                                    | Protein metabolism  | Proteolysis                            |
| N16740                     |                | truncated cathepsin A [Eriocheir sinensis]                                                              | Protein metabolism  | Proteolysis                            |
| M33821                     |                | ubiquitin [Schizosaccharomyces cryophilus OY26]                                                         | Protein metabolism  | Proteolysis                            |
| N13604                     |                | ubiquitin protein ligase [Ixodes scapularis]                                                            | Protein metabolism  | Proteolysis                            |
| N19798                     |                | Zinc metalloproteinase nas-14 [Camponotus floridanus]                                                   | Protein metabolism  | Proteolysis                            |
| N62093                     |                | masquerade, isoform C [Drosophila melanogaster]                                                         | Protein metabolism  | Proteolysis (Cuticle)                  |
| M11130                     |                | Trypsin-1 [Cerapachys biroii]                                                                           | Protein metabolism  | Proteolysis (Cuticle)                  |
| M69422                     |                | methionyl-tRNA formyltransferase, mitochondrial-like [Takifugu rubripes]                                | Protein metabolism  | Regulation of translational elongation |
| M4937                      | isotig11060    | ORM1-like protein 3 [Danio rerio]                                                                       | Protein metabolism  | Regulation of translational elongation |
| N24811                     |                | eIF2B-alpha protein [Daphnia pulex]                                                                     | Protein metabolism  | Regulation of translational initiation |
| N19015                     | contig01822    | Eukaryotic translation initiation factor 4 gamma 3 [Crassostrea gigas]                                  | Protein metabolism  | Regulation of translational initiation |
| M13011                     | isotig06273    | PREDICTED: eukaryotic translation initiation factor 2B, subunit 3 gamma-like [Saccoclossus kowalevskii] | Protein metabolism  | Regulation of translational initiation |
| M21285                     | isotig03087    | 60S ribosomal protein L15 [Orconectes limosus]                                                          | Protein metabolism  | Ribosome biogenesis                    |
| M21399                     |                | 60S ribosomal protein L6 [Coptotermes formosanus]                                                       | Protein metabolism  | Ribosome biogenesis                    |
| M20050                     |                | Isolate DGGE band AntEuk13-5 18S ribosomal RNA gene [Euphausia superba]                                 | Protein metabolism  | Ribosome biogenesis                    |
| M70869                     |                | Isolate DGGE band AntEuk13-5 18S ribosomal RNA gene [Euphausia superba]                                 | Protein metabolism  | Ribosome biogenesis                    |
| N20156                     |                | mitochondrial ribosomal protein, S9, putative [Aedes aegypti]                                           | Protein metabolism  | Ribosome biogenesis                    |
| N36346                     |                | PREDICTED: GTPase Era, mitochondrial [Acyrtosiphon pisum]                                               | Protein metabolism  | Ribosome biogenesis                    |
| N59348                     |                | PREDICTED: GTPase Era, mitochondrial [Tribolium castaneum]                                              | Protein metabolism  | Ribosome biogenesis                    |
| N38551                     |                | PREDICTED: GTPase Era, mitochondrial-like [Aplysia californica]                                         | Protein metabolism  | Ribosome biogenesis                    |
| M25016                     |                | Crithidia fasciculata ribosomal DNA repeat [Crithidia fasciculata]                                      | Protein metabolism  | Ribosome biogenesis                    |
| N13567                     |                | ribosomal protein L24 [Azumapecten farreri]                                                             | Protein metabolism  | Ribosome biogenesis                    |
| M75744                     | isotig03736    | ribosomal protein L36 [Procambarus clarkii]                                                             | Protein metabolism  | Ribosome biogenesis                    |
| N5213                      | isotig04974    | ribosomal protein P1 [Palaemon varians]                                                                 | Protein metabolism  | Ribosome biogenesis                    |
| N16052                     |                | ribosomal protein rpl35a [Lineus viridis]                                                               | Protein metabolism  | Ribosome biogenesis                    |
| N3958                      |                | ribosomal protein S26 [Branchiostoma belcheri]                                                          | Protein metabolism  | Ribosome biogenesis                    |
| M101760                    |                | ribosomal protein S7 [Procambarus clarkii]                                                              | Protein metabolism  | Ribosome biogenesis                    |
| M84192                     |                | Taku spinosocarinatus voucher LIRS07-26 28S ribosomal RNA gene                                          | Protein metabolism  | Ribosome biogenesis                    |
| M70652                     |                | procollagen-lysine2-oxoglutarate 5-dioxygenase [Schistosoma mansoni]                                    | Protein metabolism  | Ribosome biogenesis                    |
| M6935                      |                | ubiquitin thiolesterase [Acanthamoeba castellanii str. Neff]                                            | Protein metabolism  |                                        |
| <b>Response to stress</b>  |                |                                                                                                         |                     |                                        |
| N14974                     |                | antimicrobial peptide type 1 precursor Ic [Pandalopsis japonica]                                        | Response to stress  | Defence response                       |
| M31132                     |                | antimicrobial peptide type 2 precursor IIb [Pandalopsis japonica]                                       | Response to stress  | Defence response                       |
| N737                       |                | antimicrobial peptide type 2 precursor IIc [Pandalopsis japonica]                                       | Response to stress  | Defence response                       |
| M69891                     |                | attractin [Aedes aegypti]                                                                               | Response to stress  | Defence response                       |
| N58744                     |                | beta-1,4-N-acetylgalactosaminyltransferase bre-4-like [Acyrtosiphon pisum]                              | Response to stress  | Defence response                       |
| N47460                     |                | CD209 antigen-like protein D [Oncorhynchus mykiss]                                                      | Response to stress  | Defence response                       |
| M39190                     |                | crustin 1 [Panulirus japonicus]                                                                         | Response to stress  | Defence response                       |
| N7810                      |                | crustin 3 [Panulirus japonicus]                                                                         | Response to stress  | Defence response                       |
| N9625                      |                | crustin type I [Macrobrachium rosenbergii]                                                              | Response to stress  | Defence response                       |
| N28574                     |                | crustin-like peptide type 2 [Marsupenaeus japonicus]                                                    | Response to stress  | Defence response                       |
| N22242                     |                | C-type lectin [Penaeus monodon]                                                                         | Response to stress  | Defence response                       |
| M87391                     | isotig10958    | C-type lectin 4 [Fenneropenaeus merguensis]                                                             | Response to stress  | Defence response                       |
| M101615                    | FW09YNP02J52KI | C-type lectin protein [Fenneropenaeus chinensis]                                                        | Response to stress  | Defence response                       |
| M68819                     |                | C-type lectin protein [Fenneropenaeus chinensis]                                                        | Response to stress  | Defence response                       |
| N23963                     |                | hemolymph clottable protein [Litopenaeus vannamei]                                                      | Response to stress  | Defence response                       |
| N15313                     |                | Kazal-type proteinase inhibitor [Pacifastacus leniusculus]                                              | Response to stress  | Defence response                       |
| N30729                     |                | PREDICTED: mucin-22-like [Musca domestica]                                                              | Response to stress  | Defence response                       |
| M14897                     |                | NudC domain-containing protein, putative [Ixodes scapularis]                                            | Response to stress  | Defence response                       |
| M14594                     |                | PREDICTED: CD209 antigen-like protein A isoform X1 [Poecilia formosa]                                   | Response to stress  | Defence response                       |
| M4674                      |                | PREDICTED: mucin-22-like [Danio rerio]                                                                  | Response to stress  | Defence response                       |
| M11229                     |                | PREDICTED: mucin-2-like [Geospiza fortis]                                                               | Response to stress  | Defence response                       |
| N25269                     |                | Putative ferric-chelate reductase 1 [Crassostrea gigas]                                                 | Response to stress  | Defence response                       |
| M60524                     |                | serine protease inhibitor [Marsupenaeus japonicus]                                                      | Response to stress  | Defence response                       |
| M12331                     |                | 6-4 photolyase [Eurydice pulchra]                                                                       | Response to stress  |                                        |
| M3688                      |                | PREDICTED: DNA ligase 4 [Strongylocentrotus purpuratus]                                                 | Response to stress  | DNA repair                             |
| N23030                     |                | Fanconi anemia group J protein [Crassostrea gigas]                                                      | Response to stress  | DNA repair                             |
| N34949                     |                | Mitogen-activated protein kinase kinase kinase 5 [Harpegnathos saltator]                                | Response to stress  | DNA repair                             |
| N27521                     |                | PREDICTED: DNA mismatch repair protein Mlh1 isoform X8 [Gallus gallus]                                  | Response to stress  | DNA repair                             |
| N9090                      |                | Chorion peroxidase [Camponotus floridanus]                                                              | Response to stress  | Response to oxidative stress           |
| N7649                      |                | glutathione S-transferase [Eriocheir sinensis]                                                          | Response to stress  |                                        |
| N18339                     | isotig10144    | PREDICTED: hsp90 co-chaperone Cdc37-like [Nasonia vitripennis]                                          | Response to stress  |                                        |
| M15481                     |                | PREDICTED: stress protein DDR48-like [Xenopus (Silurana) tropicalis]                                    | Response to stress  |                                        |
| <b>Signal transduction</b> |                |                                                                                                         |                     |                                        |
| N27577                     |                | TRAF and TNF receptor-associated protein [Lepeophtheirus salmonis]                                      | Signal transduction | Cell communication                     |
| N18727                     |                | PREDICTED: similar to vlc [Tribolium castaneum]                                                         | Signal transduction | Cell-cell signaling                    |
| M31478                     |                | Beta-crystallin A1 [Lepeophtheirus salmonis]                                                            | Signal transduction | eye                                    |
| N18741                     |                | Ankyrin repeat and SOCS box protein [Cerapachys biroii]                                                 | Signal transduction | Intracellular signal transduction      |
| M7219                      |                | cAMP-dependent protein kinase catalytic subunit [Pediculus humanus corporis]                            | Signal transduction | Intracellular signal transduction      |

| ID krill2        | ID krill1      | Annotation                                                                            | GO Term             | GO Child Term                     |
|------------------|----------------|---------------------------------------------------------------------------------------|---------------------|-----------------------------------|
| N60164           | isotig09573    | guanine nucleotide exchange factor, putative [Pediculus humanus corporis]             | Signal transduction | Intracellular signal transduction |
| M77475           |                | PREDICTED: CDC42 binding protein kinase alpha-like [Saccoglossus kowalevskii]         | Signal transduction | Intracellular signal transduction |
| N40391           |                | PREDICTED: integral membrane protein GPR155-like [Saccoglossus kowalevskii]           | Signal transduction | Intracellular signal transduction |
| N14631           |                | PREDICTED: D-dopachrome decarboxylase-like [Ochotona princeps]                        | Signal transduction | melanin synthesis                 |
| M4332            |                | von Willebrand factor D and EGF domain-containing protein [Meleagris gallopavo]       | Signal transduction | Signal transduction               |
| M104013          |                | adenylyl cyclase [Daphnia pulex]                                                      | Signal transduction |                                   |
| M5422            | FW09YNP01ATTT0 | arrestin [Libelloides macaronius]                                                     | Signal transduction |                                   |
| N19969           | isotig04228    | Arrestin homolog [Locusta migratoria]                                                 | Signal transduction |                                   |
| M58788           |                | cartilage intermediate layer protein 1 [Taeniopygia guttata]                          | Signal transduction |                                   |
| N44494           |                | Glucose-dependent insulinotropic receptor, partial [Heterocephalus glaber]            | Signal transduction |                                   |
| N31246           |                | integral membrane protein GPR177-B, putative [Ixodes scapularis]                      | Signal transduction |                                   |
| N42645           |                | Juvenile hormone-inducible protein [Anopheles darlingi]                               | Signal transduction |                                   |
| N18394           |                | kruppel like protein 1, partial [Locusta migratoria]                                  | Signal transduction |                                   |
| M102096          |                | notch 2 [Daphnia pulex]                                                               | Signal transduction |                                   |
| N36305           | isotig02060    | opsin [Triops granarius]                                                              | Signal transduction |                                   |
| M61997           |                | phosphatidylinositol 3-kinase regulatory subunit alpha-like [Nasonia vitripennis]     | Signal transduction |                                   |
| M16660           |                | pigment-dispersing hormone 3 [Marsupenaeus japonicus]                                 | Signal transduction |                                   |
| M93343           |                | PREDICTED: apoptosis regulatory protein Siva isoform X2 [Mesocricetus auratus]        | Signal transduction |                                   |
| M96174           |                | PREDICTED: neither inactivation nor afterpotential protein C [Nasonia vitripennis]    | Signal transduction |                                   |
| M11904           |                | PREDICTED: TBC1 domain family member CG11727 [Apis mellifera]                         | Signal transduction |                                   |
| M85776           |                | signal transducer and activator of transcription [Fenneropenaeus chinensis]           | Signal transduction |                                   |
| N28816           |                | signal transducer and activator of transcription [Penaeus monodon]                    | Signal transduction |                                   |
| N25485           |                | Solute carrier family 2, facilitated glucose transporter member 1 [Crassostrea gigas] | Signal transduction |                                   |
| M102302          |                | Tankyrase-1 [Tupaia chinensis]                                                        | Signal transduction |                                   |
| M8431            |                | tetraspanins-like protein-8 [Fenneropenaeus chinensis]                                | Signal transduction |                                   |
| <b>Transport</b> |                |                                                                                       |                     |                                   |
| N56030           |                | sugar transporter, putative [Ixodes scapularis]                                       | Transport           | Carbohydrate transport            |
| M61              |                | PREDICTED: ran-specific GTPase-activating protein-like [Nasonia vitripennis]          | Transport           | Intracellular transport           |
| N13115           |                | vacuolar amino acid transporter, putative [Pediculus humanus corporis]                | Transport           | Intracellular transport           |
| N34512           |                | calcium uptake protein 1 homolog, mitochondrial [Acyrtosiphon pisum]                  | Transport           | Ion transport                     |
| N24758           |                | chloride channel, putative [Ixodes scapularis]                                        | Transport           | Ion transport                     |
| N48362           |                | Cytochrome c oxidase copper chaperone [Cerapachys biroi]                              | Transport           | Ion transport                     |
| M107683          | isotig07122    | Euphausia superba mitochondrion, partial genome                                       | Transport           | Ion transport                     |
| M60197           | isotig05838    | Euphausia superba voucher 841M mitochondrion, partial genome                          | Transport           | Ion transport                     |
| M6590            |                | ileal sodium/bile acid cotransporter-like isoform 1 [Nasonia vitripennis]             | Transport           | Ion transport                     |
| N5882            |                | potassium voltage-gated channel subfamily G member 3 [Sorex araneus]                  | Transport           | Ion transport                     |
| M2239            |                | PREDICTED: organic cation transporter protein-like isoform 1 [Bombus terrestris]      | Transport           | Ion transport                     |
| M62469           |                | PREDICTED: putative ferric-chelate reductase 1-like [Xenopus [Silurana] tropicalis]   | Transport           | Ion transport                     |
| M85975           |                | PREDICTED: zinc transporter ZIP11-like [Oryzias latipes]                              | Transport           | Ion transport                     |
| N31065           |                | PREDICTED: zinc transporter ZIP13-like [Metaseiulus occidentalis]                     | Transport           | Ion transport                     |
| M6504            |                | putative TRP channel protein [Periplaneta americana]                                  | Transport           | Ion transport                     |
| N26972           | isotig09262    | Trafficking protein particle complex subunit 10 [Harpegnathos saltator]               | Transport           | Ion transport                     |
| E6444            |                | voltage-dependent non-L-type calcium channel alpha-1 subunit [Cancer borealis]        | Transport           | Ion transport                     |
| M18825           |                | fatty acids binding protein [Fenneropenaeus chinensis]                                | Transport           | Lipid transport                   |
| M2931            |                | clottable protein [Marsupenaeus japonicus]                                            | Transport           | Lipid transport                   |
| M2853            |                | PREDICTED: apolipoprotein D-like [Bombyx mori]                                        | Transport           | Lipid transport                   |
| M56511           |                | PREDICTED: apolipoprotein D-like [Bombyx mori]                                        | Transport           | Lipid transport                   |
| N22878           |                | PREDICTED: peroxisomal membrane protein PMP34-like [Apis mellifera]                   | Transport           | Mitochondrial transport           |
| M103670          |                | rab3 GTPase-activating protein non-catalytic subunit [Latimeria chalumnae]            | Transport           | Neurotransmitter transport        |
| N21981           |                | Sodium-dependent neutral amino acid transporter B(0) [Harpegnathos saltator]          | Transport           | Neurotransmitter transport        |
| M78387           |                | coiled-coil domain-containing protein 93 [Xenopus laevis]                             | Transport           | Protein transport                 |
| N12003           |                | hypothetical protein CAPTEDRAFT_223046 [Capitella teleta]                             | Transport           | Protein transport                 |
| N18371           |                | PREDICTED: AP-3 complex subunit delta-1-like [Megachile rotundata]                    | Transport           | Protein transport                 |
| M102512          |                | PREDICTED: putative Ras-related protein Rab-33-like [Saccoglossus kowalevskii]        | Transport           | Protein transport                 |
| N24480           |                | PREDICTED: ras-related protein Rab-18 isoform 3 [Trichechus manatus latirostris]      | Transport           | Protein transport                 |
| N42390           |                | PREDICTED: transportin-1 [Nasonia vitripennis]                                        | Transport           | Protein transport                 |
| N22300           |                | Facilitated trehalose transporter Tret1 [Drosophila willistoni]                       | Transport           | Transmembrane transport           |
| M56361           |                | PREDICTED: monocarboxylate transporter 12-like [Nasonia vitripennis]                  | Transport           | Transmembrane transport           |
| M104151          | isotig00375    | solute carrier family 25-like protein-2 [Microplitis demolitor]                       | Transport           | Transmembrane transport           |
| M7582            | FW09YNP02IE6U6 | ADP-ribosylation factor GTPase-activating protein [Scylla paramamosain]               | Transport           | Vesicle-mediated transport        |
| N11990           |                | N-terminal kinase-like protein [Zootermopsis nevadensis]                              | Transport           | Vesicle-mediated transport        |
| N33152           |                | PREDICTED: AP-2 complex subunit alpha [Tribolium castaneum]                           | Transport           | Vesicle-mediated transport        |
| N49441           |                | ABC transporter [Daphnia pulex]                                                       | Transport           |                                   |
| N40938           | GTJW03E08JYE7N | amino acid transporter [Aedes aegypti]                                                | Transport           |                                   |
| N28773           |                | autotransporter [Bartonella tribocorum CIP 105476]                                    | Transport           |                                   |
| N13946           | isotig08118    | crustacyanin subunit A [Fenneropenaeus merguensis]                                    | Transport           |                                   |
| M71333           |                | PREDICTED: transmembrane 9 superfamily member 1-like [Aplysia californica]            | Transport           |                                   |
| N23238           | FW09YNP01C2I8L | Solute carrier family 35 member F5 [Crassostrea gigas]                                | Transport           |                                   |
| M87987           | isotig04624    | Solute carrier family 46 member 3 [Harpegnathos saltator]                             | Transport           |                                   |
| N34674           |                | transferrin [Anopheles darlingi]                                                      | Transport           |                                   |
| N20330           |                | yrdC domain-containing protein, mitochondrial isoform X2 [Gallus gallus]              | Transport           |                                   |
| <b>Cuticle</b>   |                |                                                                                       |                     |                                   |
| N25681           | isotig08949    | arthrodial cuticle protein AMP6.0 [Callinectes sapidus]                               |                     | Cuticle                           |
| M63421           | isotig00113    | arthrodial cuticle protein AMP6.0 [Callinectes sapidus]                               |                     | Cuticle                           |
| M22046           | isotig00792    | cuticle proprotein proCP5.2 [Callinectes sapidus]                                     |                     | Cuticle                           |
| M4810            | isotig00786    | cuticle proprotein proCP5.2 [Callinectes sapidus]                                     |                     | Cuticle                           |
| M17882           |                | cuticle protein [Culex quinquefasciatus]                                              |                     | Cuticle                           |
| N8897            |                | cuticle protein [Culex quinquefasciatus]                                              |                     | Cuticle                           |
| N6883            |                | cuticle protein [Culex quinquefasciatus]                                              |                     | Cuticle                           |
| N4421            |                | cuticle protein [Rimicaris exoculata]                                                 |                     | Cuticle                           |
| N4800            | isotig03652    | Cuticle protein 6 [Lepeophtheirus salmonis]                                           |                     | Cuticle                           |
| N4805            | isotig08546    | Cuticle protein 6 [Lepeophtheirus salmonis]                                           |                     | Cuticle                           |
| N6680            |                | Cuticle protein 6 [Lepeophtheirus salmonis]                                           |                     | Cuticle                           |
| M36900           | GTJW03E08JWLFE | Cuticle protein 6 [Lepeophtheirus salmonis]                                           |                     | Cuticle                           |
| M97333           |                | Cuticle protein 7 [Lepeophtheirus salmonis]                                           |                     | Cuticle                           |
| N51806           |                | cuticle protein CB6 [Portunus pelagicus]                                              |                     | Cuticle                           |
| M47341           |                | cuticle protein CB6 [Portunus pelagicus]                                              |                     | Cuticle                           |
| M56242           |                | early cuticle protein 6 [Callinectes sapidus]                                         |                     | Cuticle                           |

| ID krill2 | ID krill1 | Annotation                                                                     | GO Term | GO Child Term |
|-----------|-----------|--------------------------------------------------------------------------------|---------|---------------|
| N7506     |           | glycosyl-phosphatidylinositol-linked carbonic anhydrase [Litopenaeus vannamei] |         | Cuticle       |
| M10340    |           | PREDICTED: endochitinase-like isoform X1 [Apis mellifera]                      |         | Cuticle       |
| N9845     |           | PREDICTED: endochitinase-like isoform X1 [Apis mellifera]                      |         | Cuticle       |
| N25691    |           | putative cuticle protein [Artemia franciscana]                                 |         | Cuticle       |
| M1924     |           | RecName: Full=Cuticle protein 6; AltName: Full=BcNCP14.9                       |         | Cuticle       |

#### No GO assigned

|        |  |                                                                             |  |  |
|--------|--|-----------------------------------------------------------------------------|--|--|
| M1994  |  | Glutamine and serine-rich protein 1 [Harpegnathos saltator]                 |  |  |
| M3286  |  | PREDICTED: DTW domain-containing protein 1 isoform X6 [Latimeria chalumnae] |  |  |
| N20580 |  | PREDICTED: kanadaplin-like [Saccoglossus kowalevskii]                       |  |  |
| N20632 |  | PREDICTED: La autoantigen-like [Saccoglossus kowalevskii]                   |  |  |
| M74730 |  | PREDICTED: protein outspread-like [Bombyx mori]                             |  |  |
| N9515  |  | PREDICTED: testis-expressed sequence 264 protein-like [Aplysia californica] |  |  |
| M69334 |  | PREDICTED: transmembrane protein 179-like [Bombyx mori]                     |  |  |
| N36503 |  | PREDICTED: transmembrane protein 60-like isoform 1 [Oreochromis niloticus]  |  |  |







igenetic  
igenetic  
igenetic  
igenetic  
igenetic

:ess  
ess

tion  
tion  
n  
n  
n
