# Supplementary material for: Analysis of the circadian transcriptome of the Antarctic krill Euphausia superba
Source: PubMed Central journal article supplement (PMC6761102; doi:10.1038/s41598-019-50282-1), 2019-09-25
Supplement: 41598_2019_50282_MOESM7_ESM.pdf [file 41598_2019_50282_MOESM7_ESM.pdf]

## **Analysis of the circadian transcriptome of the Antarctic krill *Euphausia superba***

Alberto Biscontin<sup>1,2,\*</sup>, Paolo Martini<sup>1</sup>, Rodolfo Costa<sup>1</sup>, Achim Kramer<sup>2</sup>, Bettina Meyer<sup>3,4,5</sup>, So Kawaguchi<sup>6</sup>, Mathias Teschke<sup>3</sup>, Cristiano De Pittà<sup>1,\*</sup>

<sup>1</sup>Dipartimento di Biologia, Università degli Studi di Padova, Padova, Italy

<sup>2</sup>Laboratory of Chronobiology, Charité Universitätsmedizin Berlin, Berlin, Germany

<sup>3</sup>Section Polar Biological Oceanography, Alfred Wegener Institute Helmholtz Centre for Polar and Marine Research, Bremerhaven, Germany

<sup>4</sup>Institute for Chemistry and Biology of the Marine Environment, Carl von Ossietzky University of Oldenburg, Oldenburg, Germany

<sup>5</sup>Helmholtz Institute for Functional Marine Biodiversity (HIFMB) at the University of Oldenburg, 26111 Oldenburg, Germany

<sup>6</sup>Department of Environment and Heritage, Australian Antarctic Division, Kingston, Tasmania, Australia

\*Corresponding authors:

Cristiano De Pittà, Dipartimento di Biologia, Università degli Studi di Padova, via U. Bassi 58/B 35131 Padova, Italy; Phone: +39-049-8276210; Fax: +39-049-8276209; e-mail address: cristiano.depitta@unipd.it

Alberto Biscontin, Dipartimento di Biologia, Università degli Studi di Padova, via U. Bassi 58/B 35131 Padova, Italy; Phone: +39-049-8276228; Fax: +39-049-8276209; e-mail address: alberto.biscontin@unipd.it

**Supplementary Table 6. Gene Ontology analysis of genes with a sinusoidal expression pattern in DD.**

Classification of annotated genes with sinusoidal expression patterns throughout the 24-hour cycle in DD regime (802 genes).

<sup>a</sup>ID: accession number of krill master transcriptome 23; <sup>b</sup>Annotation = description of the gene; <sup>c</sup>GO term: gene ontology biological process;

<sup>d</sup>GO child term: most fitting gene ontology child term to further refine the functional annotation.

| ID                                     | Annotation                                                            | GO term                         | Go child term              |
|----------------------------------------|-----------------------------------------------------------------------|---------------------------------|----------------------------|
| <b>Cellular component organization</b> |                                                                       |                                 |                            |
| M21859                                 | Branchiostoma floridae hypothetical protein, mRNA                     | Cellular component organization | Chromosome organization    |
| N11743                                 | hypothetical protein [Zea mays]                                       | Cellular component organization | Chromosome organization    |
| N12067                                 | anti-silencing protein, putative [Ixodes scapularis] >gi 215509256 gt | Cellular component organization | Chromosome organization    |
| N16859                                 | unknown [Dendroctonus ponderosae]                                     | Cellular component organization | Chromosome organization    |
| N18776                                 | DNA replication factor/protein phosphatase inhibitor SET/SPR-2, put   | Cellular component organization | Chromosome organization    |
| N39837                                 | PREDICTED: Metaseiulus occidentalis histone H3.3-like (LOC1009088     | Cellular component organization | Chromosome organization    |
| N51451                                 | predicted protein [Ostreococcus lucimarinus CCE9901] >gi 1445764:     | Cellular component organization | Chromosome organization    |
| E1547                                  | hypothetical protein DAPPUDRAFT_100611 [Daphnia pulex]                | Cellular component organization | Cytoskeleton organization  |
| E1610                                  | alpha-2-tubulin [Gecarcinus lateralis]                                | Cellular component organization | Cytoskeleton organization  |
| E4642                                  | hypothetical protein AMTR_s00032p00056500 [Amborella trichopoc        | Cellular component organization | Cytoskeleton organization  |
| M108155                                | hypothetical protein AaeL_AAE008947 [Aedes aegypti] >gi 108875(       | Cellular component organization | Cytoskeleton organization  |
| M19361                                 | Cherax quadricarinatus alpha-I tubulin mRNA, complete cds             | Cellular component organization | Cytoskeleton organization  |
| M31074                                 | profilin [Penaeus monodon]                                            | Cellular component organization | Cytoskeleton organization  |
| M3825                                  | hypothetical protein BRAFLDRAFT_60087 [Branchiostoma floridae] >      | Cellular component organization | Cytoskeleton organization  |
| M56919                                 | PREDICTED: Saccoglossus kowalevskii cytoplasmic dynein 1 heavy ch     | Cellular component organization | Cytoskeleton organization  |
| M71966                                 | beta-tubulin [Oxymonadida environmental sample]                       | Cellular component organization | Cytoskeleton organization  |
| M72897                                 | Mesenchytraeus solifugus alpha tubulin a2 mRNA, partial cds           | Cellular component organization | Cytoskeleton organization  |
| M74507                                 | hypothetical protein BRAFLDRAFT_124711 [Branchiostoma floridae]       | Cellular component organization | Cytoskeleton organization  |
| M7549                                  |                                                                       | Cellular component organization | Cytoskeleton organization  |
| M79471                                 | Botryotinia fuckeliana isolate T4 SuperContig_34_1 genomic supercco   | Cellular component organization | Cytoskeleton organization  |
| M80588                                 | GD13338 [Drosophila simulans] >gi 194195474 gb EDX09050.1  GC         | Cellular component organization | Cytoskeleton organization  |
| M8257                                  | PREDICTED: kinesin family member 21A-like [Saccoglossus kowalevsk     | Cellular component organization | Cytoskeleton organization  |
| M8793                                  | Homarus americanus alpha-III tubulin mRNA, complete cds               | Cellular component organization | Cytoskeleton organization  |
| N12749                                 |                                                                       | Cellular component organization | Cytoskeleton organization  |
| N12769                                 | hypothetical protein DAPPUDRAFT_311761 [Daphnia pulex]                | Cellular component organization | Cytoskeleton organization  |
| N12891                                 |                                                                       | Cellular component organization | Cytoskeleton organization  |
| N19790                                 | Cryptocercus punctulatus alpha-tubulin (Atub) mRNA, partial cds       | Cellular component organization | Cytoskeleton organization  |
| N20119                                 | PREDICTED: Takifugu rubripes tubulin gamma-1 chain-like, transcript   | Cellular component organization | Cytoskeleton organization  |
| N27135                                 | kinesin 2B [Nasonia vitripennis] >gi 299782459 ref NP_001177680.      | Cellular component organization | Cytoskeleton organization  |
| N4420                                  | beta-thymosin 5 [Pacifastacus leniusculus]                            | Cellular component organization | Cytoskeleton organization  |
| N49939                                 | hypothetical protein CAPTEDRAFT_139004, partial [Capitella teleta]    | Cellular component organization | Cytoskeleton organization  |
| N51300                                 | PREDICTED: actin-related protein 2-like isoform 1 [Megachile rotund   | Cellular component organization | Cytoskeleton organization  |
| N6090                                  | Homarus americanus alpha-I tubulin mRNA, complete cds                 | Cellular component organization | Cytoskeleton organization  |
| M2902                                  | hypothetical protein [Platynereis dumerilii]                          | Cellular component organization | Mitochondrion organization |
| <b>Cellular Process</b>                |                                                                       |                                 |                            |
| E1235                                  | PREDICTED: nuclear receptor 2C2-associated protein-like [Nasonia vi   | Cellular Process                | Cell adhesion              |
| M3223                                  | PREDICTED: calyntenin-1-like [Apis mellifera]                         | Cellular Process                | Cell adhesion              |
| M68669                                 | Thrombospondin-3 precursor, putative [Pediculus humanus corporis      | Cellular Process                | Cell adhesion              |
| M69044                                 | hypothetical protein DAPPUDRAFT_303213 [Daphnia pulex]                | Cellular Process                | Cell adhesion              |
| M83352                                 |                                                                       | Cellular Process                | Cell adhesion              |
| M88841                                 | PREDICTED: protocadherin Fat 1 isoform X5 [Xenopus (Silurana) tropi   | Cellular Process                | Cell adhesion              |
| N20755                                 | PREDICTED: Apis mellifera vinculin (Vinc), mRNA                       | Cellular Process                | Cell adhesion              |
| N46511                                 | hemolectin, putative [Pediculus humanus corporis] >gi 212515478 f     | Cellular Process                | Cell adhesion              |
| N55353                                 | PREDICTED: similar to conserved hypothetical protein [Tribolium cast  | Cellular Process                | Cell adhesion              |
| M1163                                  | PREDICTED: ubiquitin-conjugating enzyme E2 C-like [Nasonia vitriper   | Cellular Process                | Cell cycle                 |
| M14298                                 | structural maintenance of chromosome protein 2 [Daphnia pulex]        | Cellular Process                | Cell cycle                 |
| M16206                                 | Salmo salar clone ssal-rgh-519-317 Ubiquitin-conjugating enzyme E2    | Cellular Process                | Cell cycle                 |
| M18062                                 | PREDICTED: cell division cycle protein 123 homolog isoform X1 [Cavi   | Cellular Process                | Cell cycle                 |
| M2128                                  | cyclin H [Penaeus monodon]                                            | Cellular Process                | Cell cycle                 |
| M3247                                  | hypothetical protein DAPPUDRAFT_301838 [Daphnia pulex]                | Cellular Process                | Cell cycle                 |
| M71538                                 | Crassostrea gigas beta-tubulin mRNA, partial cds                      | Cellular Process                | Cell cycle                 |
| N14809                                 | ubiquitin protein ligase [Ixodes scapularis] >gi 215497661 gb EEC07   | Cellular Process                | Cell cycle                 |
| N18501                                 | hypothetical protein DAPPUDRAFT_200622 [Daphnia pulex]                | Cellular Process                | Cell cycle                 |
| N19234                                 | PREDICTED: origin recognition complex subunit 4 [Sorex araneus]       | Cellular Process                | Cell cycle                 |
| N19471                                 | hypothetical protein DAPPUDRAFT_300085 [Daphnia pulex]                | Cellular Process                | Cell cycle                 |
| N19655                                 | PREDICTED: Orcinus orca structural maintenance of chromosomes 2       | Cellular Process                | Cell cycle                 |
| N22167                                 | PREDICTED: Saccoglossus kowalevskii mps one binder kinase activatc    | Cellular Process                | Cell cycle                 |
| N2681                                  | cyclin A [Litopenaeus vannamei] >gi 459217372 gb AGG40745.1  c        | Cellular Process                | Cell cycle                 |

| ID     | Annotation                                                                                      | GO term          | Go child term        |
|--------|-------------------------------------------------------------------------------------------------|------------------|----------------------|
| N28489 | PREDICTED: F-box protein 31-like [Saccoglossus kowalevskii]                                     | Cellular Process | Cell cycle           |
| N33828 | PREDICTED: kinesin family member 20A-like [Saccoglossus kowalevskii]                            | Cellular Process | Cell cycle           |
| N52657 | PREDICTED: CDK-activating kinase assembly factor MAT1-like isoform 1 [Saccoglossus kowalevskii] | Cellular Process | Cell cycle           |
| N20070 | Bcl-2-like protein 1 [Acromyrmex echinatior]                                                    | Cellular Process | Cell death           |
| N20989 | GalNAc/Gal-specific lectin [Crenomytilus grayanus]                                              | Cellular Process | Cell death           |
| N26730 | PREDICTED: protein FAM32A-like [Ceratitis capitata]                                             | Cellular Process | Cell death           |
| N36400 | GL14252 [Drosophila persimilis] >gi 194103844 gb EDW25887.1                                     | Cellular Process | Cell death           |
| N6864  | peroxiredoxin-like protein [Coptotermes formosanus]                                             | Cellular Process | Cell death           |
| N38997 | GD20723 [Drosophila simulans] >gi 194199915 gb EDX13491.1                                       | Cellular Process | Cell differentiation |
| M41892 | Homarus americanus cytoplasmic type actin 1 mRNA, complete cds                                  | Cellular Process | Cell growth          |
| N22228 | hypothetical protein DAPPUDRAFT_305543 [Daphnia pulex]                                          | Cellular Process | Cell growth          |
| M55361 | hypothetical protein TcasGA2_TC011986 [Tribolium castaneum]                                     | Cellular Process | Cell proliferation   |
| N19000 | GE12547 [Drosophila yakuba] >gi 194176995 gb EDW90606.1                                         | Cellular Process | Cell proliferation   |
| N22500 | hypothetical protein YQE_04700, partial [Dendroctonus ponderosae]                               | Cellular Process | Cell proliferation   |
| N12719 | PREDICTED: similar to dre4 CG1828-PA [Tribolium castaneum] >gi 272727272 gb E                   | Cellular Process | Other                |
| N13328 | creatine amidinohydrolase [Bacillus sp. BSD-8]                                                  | Cellular Process | Other                |
| N18150 | hypothetical protein BRAFLDRAFT_63199 [Branchiostoma floridae] >                                | Cellular Process | Other                |

## Developmental process

|         |                                                                                         |                       |                                      |
|---------|-----------------------------------------------------------------------------------------|-----------------------|--------------------------------------|
| M113658 | PREDICTED: hypothetical protein LOC100120957 isoform 2 [Nasonia vitripennis]            | Developmental process | Embryo development                   |
| M79962  | Inversin [Crassostrea gigas]                                                            | Developmental process | Embryo development                   |
| N19661  | notchless homolog 1 [Xenopus (Silurana) tropicalis] >gi 115292058 gb E                  | Developmental process | Embryo development                   |
| N42326  | PREDICTED: COP9 signalosome complex subunit 3 [Ornithorhynchus anatinus]                | Developmental process | Embryo development                   |
| M62977  | plexin A, putative [Ixodes scapularis] >gi 215500475 gb EEC09969.1                      | Developmental process | Multicellular organismal development |
| M7907   | PREDICTED: Nasonia vitripennis replication factor C subunit 5-like (LC)                 | Developmental process | Multicellular organismal development |
| N11876  | aurora/lpl1p-related kinase [Marthasterias glacialis]                                   | Developmental process | Multicellular organismal development |
| N15861  | PREDICTED: neurobeachin-like [Megachile rotundata]                                      | Developmental process | Multicellular organismal development |
| N16787  | hypothetical protein DAPPUDRAFT_317955 [Daphnia pulex]                                  | Developmental process | Multicellular organismal development |
| N23668  | hypothetical protein TcasGA2_TC012198 [Tribolium castaneum]                             | Developmental process | Multicellular organismal development |
| N24387  | Pediculus humanus corporis Actin, muscle, mRNA                                          | Developmental process | Multicellular organismal development |
| N26752  | hypothetical protein DAPPUDRAFT_43248 [Daphnia pulex]                                   | Developmental process | Multicellular organismal development |
| N27562  | hypothetical protein DAPPUDRAFT_43248 [Daphnia pulex]                                   | Developmental process | Multicellular organismal development |
| N37774  | Plexin-A4 precursor, putative [Pediculus humanus corporis] >gi 212555555 gb E           | Developmental process | Multicellular organismal development |
| N38617  | SET domain protein [Populus trichocarpa] >gi 222853378 gb EEE90                         | Developmental process | Multicellular organismal development |
| N57708  | hypothetical protein DAPPUDRAFT_51329 [Daphnia pulex]                                   | Developmental process | Multicellular organismal development |
| N8459   | hypothetical protein DAPPUDRAFT_305931 [Daphnia pulex]                                  | Developmental process | Multicellular organismal development |
| N18249  | hypothetical protein DAPPUDRAFT_308857 [Daphnia pulex]                                  | Developmental process | Muscle structure development         |
| N6382   | hypothetical protein DAPPUDRAFT_308857 [Daphnia pulex]                                  | Developmental process | Muscle structure development         |
| N6383   | hypothetical protein DAPPUDRAFT_308857 [Daphnia pulex]                                  | Developmental process | Muscle structure development         |
| M7706   | dystroglycan [Cherax quadricarinatus]                                                   | Developmental process | Nervous system development           |
| N21561  | hypothetical protein DAPPUDRAFT_303691 [Daphnia pulex]                                  | Developmental process | Nervous system development           |
| N40349  | hypothetical protein DAPPUDRAFT_303691 [Daphnia pulex]                                  | Developmental process | Nervous system development           |
| N9258   | RecName: Full=Semaphorin-1A; AltName: Full=Fasciclin IV; AltName: Developmental process | Developmental process | Nervous system development           |
| N22265  | src tyrosine kinase, putative [Ixodes scapularis] >gi 215497797 gb E                    | Developmental process | Other                                |

## Metabolic process

|         |                                                                                                    |                   |                                |
|---------|----------------------------------------------------------------------------------------------------|-------------------|--------------------------------|
| M64363  | autophagy protein 5 [Callinectes sapidus]                                                          | Metabolic process | Autofagy                       |
| E4652   | PREDICTED: beta-1,4-mannosyl-glycoprotein 4-beta-N-acetylglucosaminidase [Drosophila melanogaster] | Metabolic process | Carbohydrate metabolic process |
| M10340  | hypothetical protein DAPPUDRAFT_303691 [Daphnia pulex]                                             | Metabolic process | Carbohydrate metabolic process |
| M106275 | Drosophila sechellia GM24804 (Dsec\GM24804), mRNA                                                  | Metabolic process | Carbohydrate metabolic process |
| M108205 | hypothetical protein DAPPUDRAFT_303691 [Daphnia pulex]                                             | Metabolic process | Carbohydrate metabolic process |
| M112586 | hypothetical protein DAPPUDRAFT_310106 [Daphnia pulex]                                             | Metabolic process | Carbohydrate metabolic process |
| M113059 | Caenorhabditis remanei hypothetical protein (CRE_00061) mRNA, complete cds                         | Metabolic process | Carbohydrate metabolic process |
| M12607  | chitinase 2 [Penaeus monodon]                                                                      | Metabolic process | Carbohydrate metabolic process |
| M152    | chitinase 1 precursor [Litopenaeus vannamei]                                                       | Metabolic process | Carbohydrate metabolic process |
| M15537  | family 7 cellobiohydrolase [Chelura terebrans]                                                     | Metabolic process | Carbohydrate metabolic process |
| M15682  | hypothetical protein DAPPUDRAFT_303691 [Daphnia pulex]                                             | Metabolic process | Carbohydrate metabolic process |
| M16697  | i-type lysozyme-like protein 2 [Penaeus monodon]                                                   | Metabolic process | Carbohydrate metabolic process |
| M17683  | n-acetylgalactosaminyltransferase [Aedes aegypti] >gi 108884053 gb E                               | Metabolic process | Carbohydrate metabolic process |
| M18847  | hypothetical protein DAPPUDRAFT_218978 [Daphnia pulex]                                             | Metabolic process | Carbohydrate metabolic process |
| M19131  | hypothetical protein DAPPUDRAFT_218978 [Daphnia pulex]                                             | Metabolic process | Carbohydrate metabolic process |
| M23222  | hypothetical protein DAPPUDRAFT_218978 [Daphnia pulex]                                             | Metabolic process | Carbohydrate metabolic process |
| M26896  | hypothetical protein DAPPUDRAFT_303131 [Daphnia pulex]                                             | Metabolic process | Carbohydrate metabolic process |
| M33890  | beta-N-acetylglucosaminidase [Litopenaeus vannamei]                                                | Metabolic process | Carbohydrate metabolic process |
| M4050   | hypothetical protein DAPPUDRAFT_303131 [Daphnia pulex]                                             | Metabolic process | Carbohydrate metabolic process |

| ID      | Annotation                                                            | GO term           | Go child term                         |
|---------|-----------------------------------------------------------------------|-------------------|---------------------------------------|
| M44731  | hypothetical protein DAPPUDRAFT_64687 [Daphnia pulex]                 | Metabolic process | Carbohydrate metabolic process        |
| M4573   | hypothetical protein DAPPUDRAFT_218978 [Daphnia pulex]                | Metabolic process | Carbohydrate metabolic process        |
| M5604   |                                                                       | Metabolic process | Carbohydrate metabolic process        |
| M57676  |                                                                       | Metabolic process | Carbohydrate metabolic process        |
| M58440  | hypothetical protein [euryarchaeote SCGC AAA261-G15]                  | Metabolic process | Carbohydrate metabolic process        |
| M60556  | hypothetical protein DAPPUDRAFT_307215 [Daphnia pulex]                | Metabolic process | Carbohydrate metabolic process        |
| M64207  |                                                                       | Metabolic process | Carbohydrate metabolic process        |
| M65262  | UDP-GalNAc:beta-1,3-N-acetylgalactosaminyltransferase 2, partial [C   | Metabolic process | Carbohydrate metabolic process        |
| M7734   | hypothetical protein DAPPUDRAFT_243998 [Daphnia pulex]                | Metabolic process | Carbohydrate metabolic process        |
| M78640  |                                                                       | Metabolic process | Carbohydrate metabolic process        |
| M8647   | chitinase [Litopenaeus vannamei]                                      | Metabolic process | Carbohydrate metabolic process        |
| M93819  | hypothetical protein DAPPUDRAFT_303085 [Daphnia pulex]                | Metabolic process | Carbohydrate metabolic process        |
| N11540  | chitinase [Fenneropenaeus chinensis]                                  | Metabolic process | Carbohydrate metabolic process        |
| N12995  | hypothetical protein DAPPUDRAFT_218978 [Daphnia pulex]                | Metabolic process | Carbohydrate metabolic process        |
| N13131  | hypothetical protein CAPTEDRAFT_149382 [Capitella teleta]             | Metabolic process | Carbohydrate metabolic process        |
| N13335  | gastrolith protein [Cherax quadricarinatus]                           | Metabolic process | Carbohydrate metabolic process        |
| N13357  | hypothetical protein DAPPUDRAFT_218978 [Daphnia pulex]                | Metabolic process | Carbohydrate metabolic process        |
| N13771  | PREDICTED: transaldolase-like [Nasonia vitripennis]                   | Metabolic process | Carbohydrate metabolic process        |
| N14317  | hypothetical protein DAPPUDRAFT_223002 [Daphnia pulex]                | Metabolic process | Carbohydrate metabolic process        |
| N18690  | Colias eurytheme clone PGI3-31_10 phosphoglucose isomerase (PGI)      | Metabolic process | Carbohydrate metabolic process        |
| N18742  | Ascidia sydneiensis samea 6-PGDH mRNA for 6-phosphogluconate de       | Metabolic process | Carbohydrate metabolic process        |
| N20102  | phosphoglucomutase 2 [Xenopus (Silurana) tropicalis]                  | Metabolic process | Carbohydrate metabolic process        |
| N20408  | beta 1,4-endoglucanase [Cherax quadricarinatus]                       | Metabolic process | Carbohydrate metabolic process        |
| N20512  | chitin binding peritrophin-A, putative [Pediculus humanus corporis] > | Metabolic process | Carbohydrate metabolic process        |
| N20630  | PREDICTED: inter-alpha-trypsin inhibitor heavy chain H2 [Melopsitta   | Metabolic process | Carbohydrate metabolic process        |
| N21218  | endo-beta-1,4-glucanase [Coptotermes formosanus]                      | Metabolic process | Carbohydrate metabolic process        |
| N22117  | PREDICTED: beta-hexosaminidase subunit alpha-like [Ciona intestinal   | Metabolic process | Carbohydrate metabolic process        |
| N23226  | Carbohydrate sulfotransferase 14 [Camponotus floridanus]              | Metabolic process | Carbohydrate metabolic process        |
| N23308  | PREDICTED: glycogen debranching enzyme-like [Nasonia vitripennis]     | Metabolic process | Carbohydrate metabolic process        |
| N23374  | hypothetical protein BRAFLDRAFT_123545 [Branchiostoma floridae]       | Metabolic process | Carbohydrate metabolic process        |
| N23832  | hypothetical protein D910_12090 [Dendroctonus ponderosae]             | Metabolic process | Carbohydrate metabolic process        |
| N24477  | cellulase [Coptotermes acinaciformis]                                 | Metabolic process | Carbohydrate metabolic process        |
| N26608  | cuticular protein [Artemia franciscana]                               | Metabolic process | Carbohydrate metabolic process        |
| N29331  |                                                                       | Metabolic process | Carbohydrate metabolic process        |
| N30729  |                                                                       | Metabolic process | Carbohydrate metabolic process        |
| N32193  | UDP-GalNAc:polypeptide N-acetylgalactosaminyltransferase, putativ     | Metabolic process | Carbohydrate metabolic process        |
| N32465  | hypothetical protein TRIADDRAFT_56539 [Trichoplax adhaerens] >gi      | Metabolic process | Carbohydrate metabolic process        |
| N34231  | hypothetical protein DAPPUDRAFT_62084 [Daphnia pulex]                 | Metabolic process | Carbohydrate metabolic process        |
| N34994  | hypothetical protein DAPPUDRAFT_303518 [Daphnia pulex]                | Metabolic process | Carbohydrate metabolic process        |
| N38147  | PREDICTED: protein O-mannosyl-transferase 2-like [Nasonia vitripeni   | Metabolic process | Carbohydrate metabolic process        |
| N39090  | Beta-1,4-galactosyltransferase 3 [Chelonia mydas]                     | Metabolic process | Carbohydrate metabolic process        |
| N4191   | cuticular protein analogous to peritrophins 3-A1 precursor [Nasonia   | Metabolic process | Carbohydrate metabolic process        |
| N43865  | glycogen synthase [Marsupenaeus japonicus]                            | Metabolic process | Carbohydrate metabolic process        |
| N44790  | glycogen synthase [Marsupenaeus japonicus]                            | Metabolic process | Carbohydrate metabolic process        |
| N46532  | phosphoglucomutase/phosphomannomutase, putative [Ixodes scapi         | Metabolic process | Carbohydrate metabolic process        |
| N57180  | predicted protein [Nematostella vectensis] >gi 156227446 gb EDO4      | Metabolic process | Carbohydrate metabolic process        |
| N7328   |                                                                       | Metabolic process | Carbohydrate metabolic process        |
| N9218   | i-type lysozyme-like protein 2 [Penaeus monodon]                      | Metabolic process | Carbohydrate metabolic process        |
| N9476   | Gasterosteus aculeatus clone CFW246-H10 mRNA sequence                 | Metabolic process | Carbohydrate metabolic process        |
| N9845   |                                                                       | Metabolic process | Carbohydrate metabolic process        |
| M1034   | low molecular weight protein-tyrosine-phosphatase [Aedes aegypti]     | Metabolic process | Cellular amino acid metabolic process |
| M109440 | Asparaginyl-tRNA synthetase, isoform A [Drosophila melanogaster] >    | Metabolic process | Cellular amino acid metabolic process |
| M12382  | hypothetical protein DAPPUDRAFT_217067 [Daphnia pulex]                | Metabolic process | Cellular amino acid metabolic process |
| M1500   | aldehyde dehydrogenase 3-1 variant B [Aedes aegypti]                  | Metabolic process | Cellular amino acid metabolic process |
| M17615  | hypothetical protein BRAFLDRAFT_241455 [Branchiostoma floridae]       | Metabolic process | Cellular amino acid metabolic process |
| M2778   | glyoxylate/hydroxypyruvate reductase, putative [Ixodes scapularis] >  | Metabolic process | Cellular amino acid metabolic process |
| M2980   | hypothetical protein DAPPUDRAFT_127519 [Daphnia pulex]                | Metabolic process | Cellular amino acid metabolic process |
| M3130   | Fumarylacetoacetase [Crassostrea gigas]                               | Metabolic process | Cellular amino acid metabolic process |
| M378    | conserved hypothetical protein [Pediculus humanus corporis] >gi 21    | Metabolic process | Cellular amino acid metabolic process |
| M4015   |                                                                       | Metabolic process | Cellular amino acid metabolic process |
| M545    | hypothetical protein DAPPUDRAFT_56817 [Daphnia pulex]                 | Metabolic process | Cellular amino acid metabolic process |
| M56721  | L-aspartate dehydrogenase [Caligus clemensi]                          | Metabolic process | Cellular amino acid metabolic process |
| M61244  | hypothetical protein DAPPUDRAFT_213935 [Daphnia pulex]                | Metabolic process | Cellular amino acid metabolic process |
| M63222  | hypothetical protein DAPPUDRAFT_308482 [Daphnia pulex]                | Metabolic process | Cellular amino acid metabolic process |

| ID      | Annotation                                                            | GO term           | Go child term                                  |
|---------|-----------------------------------------------------------------------|-------------------|------------------------------------------------|
| M64302  | hypothetical protein BRAFLDRAFT_264920 [Branchiostoma floridae]       | Metabolic process | Cellular amino acid metabolic process          |
| M67606  | hypothetical protein TRIADDRAFT_33849 [Trichoplax adhaerens] >gi      | Metabolic process | Cellular amino acid metabolic process          |
| M695    | hypothetical protein BRAFLDRAFT_117885 [Branchiostoma floridae]       | Metabolic process | Cellular amino acid metabolic process          |
| M7047   | hypothetical protein DAPPUDRAFT_22132 [Daphnia pulex]                 | Metabolic process | Cellular amino acid metabolic process          |
| M87594  | PREDICTED: tryptophan 2,3-dioxygenase [Nomascus leucogenys]           | Metabolic process | Cellular amino acid metabolic process          |
| M93328  |                                                                       | Metabolic process | Cellular amino acid metabolic process          |
| M9982   | hypothetical protein DAPPUDRAFT_318167 [Daphnia pulex]                | Metabolic process | Cellular amino acid metabolic process          |
| N14451  | hematopoietic prostaglandin D synthase [Penaeus monodon]              | Metabolic process | Cellular amino acid metabolic process          |
| N14547  | hypothetical protein DAPPUDRAFT_204241 [Daphnia pulex]                | Metabolic process | Cellular amino acid metabolic process          |
| N18359  | RecName: Full=Arginine kinase; Short=AK >gi 311350 emb CAA486         | Metabolic process | Cellular amino acid metabolic process          |
| N18519  |                                                                       | Metabolic process | Cellular amino acid metabolic process          |
| N19992  | PREDICTED: arginase-1-like [Loxodonta africana]                       | Metabolic process | Cellular amino acid metabolic process          |
| N20761  | hypothetical protein DAPPUDRAFT_211091 [Daphnia pulex]                | Metabolic process | Cellular amino acid metabolic process          |
| N21644  | carboxylase:pyruvate/acetyl-coa/propionyl-CoA [Daphnia pulex]         | Metabolic process | Cellular amino acid metabolic process          |
| N22074  | glycine dehydrogenase [Aedes aegypti] >gi 108869068 gb EAT3329        | Metabolic process | Cellular amino acid metabolic process          |
| N22945  | tyrosine-protein phosphatase non-receptor type, putative [Pediculus   | Metabolic process | Cellular amino acid metabolic process          |
| N22968  |                                                                       | Metabolic process | Cellular amino acid metabolic process          |
| N23340  | PREDICTED: similar to CG3999 CG3999-PA [Tribolium castaneum] >gi      | Metabolic process | Cellular amino acid metabolic process          |
| N24289  | dopamine beta hydroxylase [Aedes aegypti] >gi 108878395 gb EAT        | Metabolic process | Cellular amino acid metabolic process          |
| N24953  | glutathione S-transferases [Macrobrachium nipponense]                 | Metabolic process | Cellular amino acid metabolic process          |
| N25257  | hypothetical protein DAPPUDRAFT_56817 [Daphnia pulex]                 | Metabolic process | Cellular amino acid metabolic process          |
| N31050  | fumble isoform 2 [Tribolium castaneum]                                | Metabolic process | Cellular amino acid metabolic process          |
| N3597   | hypothetical protein DAPPUDRAFT_213935 [Daphnia pulex]                | Metabolic process | Cellular amino acid metabolic process          |
| N36905  | hypothetical protein DAPPUDRAFT_302347 [Daphnia pulex]                | Metabolic process | Cellular amino acid metabolic process          |
| N37288  | glutathione S-transferases [Macrobrachium nipponense]                 | Metabolic process | Cellular amino acid metabolic process          |
| N38756  | Mesorhizobium ciceri biovar biserrulae WSM1271, complete genom        | Metabolic process | Cellular amino acid metabolic process          |
| N41475  | hypothetical protein CAPTEDRAFT_133965 [Capitella teleta]             | Metabolic process | Cellular amino acid metabolic process          |
| N44223  | hypothetical protein DAPPUDRAFT_23494 [Daphnia pulex]                 | Metabolic process | Cellular amino acid metabolic process          |
| N48941  | Huntingtin-associated protein-interacting protein, putative [Pediculu | Metabolic process | Cellular amino acid metabolic process          |
| N55506  | 4-aminobutyrate aminotransferase [Aedes aegypti] >gi 108870984        | Metabolic process | Cellular amino acid metabolic process          |
| N6799   | hypothetical protein DAPPUDRAFT_318250 [Daphnia pulex]                | Metabolic process | Cellular amino acid metabolic process          |
| M113051 | Euphausia superba voucher 760M mitochondrion, partial genome          | Metabolic process | Generation of precursor metabolites and energy |
| M14565  | mitochondrial ATP synthase gamma subunit precursor [Litopenaeus       | Metabolic process | Generation of precursor metabolites and energy |
| M17951  | PREDICTED: glycogen debranching enzyme-like [Nasonia vitripennis]     | Metabolic process | Generation of precursor metabolites and energy |
| M18693  | Euphausia superba large subunit ribosomal RNA gene, partial sequen    | Metabolic process | Generation of precursor metabolites and energy |
| M2029   | putative glycogen synthase [Daphnia pulex]                            | Metabolic process | Generation of precursor metabolites and energy |
| M2190   | hypothetical protein DAPPUDRAFT_304152 [Daphnia pulex]                | Metabolic process | Generation of precursor metabolites and energy |
| M71402  | Euphausia superba isolate Hap_405 cytochrome c oxidase subunit I (    | Metabolic process | Generation of precursor metabolites and energy |
| N15953  | PREDICTED: predicted protein-like [Saccoglossus kowalevskii]          | Metabolic process | Generation of precursor metabolites and energy |
| N19428  |                                                                       | Metabolic process | Generation of precursor metabolites and energy |
| N29844  | hypothetical protein DAPPUDRAFT_308028 [Daphnia pulex]                | Metabolic process | Generation of precursor metabolites and energy |
| N31394  | cytochrome c oxidase subunit VIIA putative [Scylla paramamosain]      | Metabolic process | Generation of precursor metabolites and energy |
| M102803 | hypothetical protein DAPPUDRAFT_315933 [Daphnia pulex]                | Metabolic process | Lipid metabolic process                        |
| M15493  | hypothetical protein DAPPUDRAFT_304936 [Daphnia pulex]                | Metabolic process | Lipid metabolic process                        |
| M1878   | Homo sapiens peroxisomal D3,D2-enoyl-CoA isomerase [synthetic cc      | Metabolic process | Lipid metabolic process                        |
| M32708  | putative triacylglycerol lipase [Daphnia pulex]                       | Metabolic process | Lipid metabolic process                        |
| M59828  | PREDICTED: isoprenoid synthase domain-containing protein, partial [   | Metabolic process | Lipid metabolic process                        |
| M63316  | hypothetical protein DAPPUDRAFT_300149 [Daphnia pulex]                | Metabolic process | Lipid metabolic process                        |
| M76131  | Choline/ethanolaminephosphotransferase 1 [Harpegnathos saltator]      | Metabolic process | Lipid metabolic process                        |
| M86465  | PREDICTED: galactose-3-O-sulfotransferase 1-like [Saccoglossus kow    | Metabolic process | Lipid metabolic process                        |
| M94008  | hypothetical protein D910_08102 [Dendroctonus ponderosae]             | Metabolic process | Lipid metabolic process                        |
| N12972  | PREDICTED: probable peroxisomal acyl-coenzyme A oxidase 1-like [N     | Metabolic process | Lipid metabolic process                        |
| N19190  | salivary alkaline phosphatase [Daphnia pulex]                         | Metabolic process | Lipid metabolic process                        |
| N19470  |                                                                       | Metabolic process | Lipid metabolic process                        |
| N19809  | PREDICTED: similar to gamma glutamyl transpeptidase [Tribolium ca     | Metabolic process | Lipid metabolic process                        |
| N19820  | hypothetical protein CAPTEDRAFT_160702 [Capitella teleta]             | Metabolic process | Lipid metabolic process                        |
| N29547  | pyruvate carboxylase [Aedes aegypti]                                  | Metabolic process | Lipid metabolic process                        |
| N36501  |                                                                       | Metabolic process | Lipid metabolic process                        |
| N36774  | notch protein [Parhyale hawaiiensis]                                  | Metabolic process | Lipid metabolic process                        |
| N40568  | ankyrin-1, putative [Pediculus humanus corporis] >gi 212518141 gb     | Metabolic process | Lipid metabolic process                        |
| N46859  | putative glucosylceramidase [Trichinella spiralis] >gi 316978112 gb   | Metabolic process | Lipid metabolic process                        |
| M94914  | glycosyl-phosphatidylinositol-linked carbonic anhydrase [Litopenaeu   | Metabolic process | Nitrogen compound metabolic process            |
| N23042  | Agmatinase, mitochondrial [Crassostrea gigas]                         | Metabolic process | Nitrogen compound metabolic process            |
| N45146  | hypothetical protein BRAFLDRAFT_95006 [Branchiostoma floridae] >      | Metabolic process | Nitrogen compound metabolic process            |

| ID      | Annotation                                                             | GO term           | Go child term                                |
|---------|------------------------------------------------------------------------|-------------------|----------------------------------------------|
| E2832   | ribonucleotide reductase M2, gene 2 [Xenopus (Silurana) tropicalis]    | Metabolic process | Nucleobase-containing compound metabolic pro |
| E2966   | ribonucleotide reductase M2, gene 2 [Xenopus (Silurana) tropicalis]    | Metabolic process | Nucleobase-containing compound metabolic pro |
| M1544   | PREDICTED: uridine-cytidine kinase-like 1-like isoform 3 [Bombus ter   | Metabolic process | Nucleobase-containing compound metabolic pro |
| M3158   | Armadillidium vulgare clone Avu2Apol RNA polymerase II largest sub     | Metabolic process | Nucleobase-containing compound metabolic pro |
| M35789  | oncoprotein nm23 [Litopenaeus vannamei]                                | Metabolic process | Nucleobase-containing compound metabolic pro |
| M3981   | PREDICTED: similar to adenine phosphoribosyltransferase [Tribolium     | Metabolic process | Nucleobase-containing compound metabolic pro |
| M4420   | hypothetical protein DAPPUDRAFT_218652 [Daphnia pulex]                 | Metabolic process | Nucleobase-containing compound metabolic pro |
| M56613  | hypothetical protein D910_03395 [Dendroctonus ponderosae]              | Metabolic process | Nucleobase-containing compound metabolic pro |
| M56865  | PREDICTED: inosine-5'-monophosphate dehydrogenase isoform 1 [A]        | Metabolic process | Nucleobase-containing compound metabolic pro |
| M65183  | UDP-glucose 4-epimerase [Aedes aegypti] >gi 108877101 gb EAT41         | Metabolic process | Nucleobase-containing compound metabolic pro |
| M78121  | hypothetical protein TcasGA2_TC014142 [Tribolium castaneum]            | Metabolic process | Nucleobase-containing compound metabolic pro |
| N18773  |                                                                        | Metabolic process | Nucleobase-containing compound metabolic pro |
| N18959  | exonuclease 3'-5' domain containing 2 [Xenopus laevis]                 | Metabolic process | Nucleobase-containing compound metabolic pro |
| N20569  | glycinamide ribonucleotide synthetase-aminoimidazole ribonucleoti      | Metabolic process | Nucleobase-containing compound metabolic pro |
| N21697  |                                                                        | Metabolic process | Nucleobase-containing compound metabolic pro |
| N22717  | hypothetical protein DAPPUDRAFT_332203 [Daphnia pulex]                 | Metabolic process | Nucleobase-containing compound metabolic pro |
| N24180  | hypothetical protein DAPPUDRAFT_305695 [Daphnia pulex]                 | Metabolic process | Nucleobase-containing compound metabolic pro |
| N27868  |                                                                        | Metabolic process | Nucleobase-containing compound metabolic pro |
| N28731  |                                                                        | Metabolic process | Nucleobase-containing compound metabolic pro |
| N29027  | hypothetical protein BRAFLDRAFT_116233 [Branchiostoma floridae]        | Metabolic process | Nucleobase-containing compound metabolic pro |
| N32135  | hypothetical protein DAPPUDRAFT_305911 [Daphnia pulex]                 | Metabolic process | Nucleobase-containing compound metabolic pro |
| N36668  | hypothetical protein DAPPUDRAFT_304700 [Daphnia pulex]                 | Metabolic process | Nucleobase-containing compound metabolic pro |
| N42065  | hypothetical protein DAPPUDRAFT_61988 [Daphnia pulex]                  | Metabolic process | Nucleobase-containing compound metabolic pro |
| N44205  | PREDICTED: putative tRNA pseudouridine synthase Pus10 [Condylura       | Metabolic process | Nucleobase-containing compound metabolic pro |
| E1475   | guanine nucleotide-binding protein, putative [Ixodes scapularis] >gi   | Metabolic process | Other                                        |
| M10080  | 5-aminolevulinic acid synthase [Limulus polyphemus]                    | Metabolic process | Other                                        |
| M1011   | luciferase [Photinus pyralis]                                          | Metabolic process | Other                                        |
| M103670 | hypothetical protein BRAFLDRAFT_126836 [Branchiostoma floridae]        | Metabolic process | Other                                        |
| M108370 | hypothetical protein BRAFLDRAFT_89744 [Branchiostoma floridae] >       | Metabolic process | Other                                        |
| M10960  | PREDICTED: UDP-glucuronosyltransferase 2A2-like isoform X4 [Colun      | Metabolic process | Other                                        |
| M1109   | transient receptor potential locus C protein precursor, putative [Pedi | Metabolic process | Other                                        |
| M112331 | protein kinase C and casein kinase substrate in neurons protein, puta  | Metabolic process | Other                                        |
| M12068  | PREDICTED: molybdopterin synthase catalytic subunit isoform X1 [Fic    | Metabolic process | Other                                        |
| M12304  | PREDICTED: hydroxysteroid dehydrogenase-like protein 1-like isoforr    | Metabolic process | Other                                        |
| M12450  | A kinase anchor protein, putative [Pediculus humanus corporis] >gi     | Metabolic process | Other                                        |
| M13197  | PREDICTED: dehydrogenase/reductase (SDR family) member 7B-like         | Metabolic process | Other                                        |
| M14643  |                                                                        | Metabolic process | Other                                        |
| M297    | 3-hydroxybutyrate dehydrogenase [Branchiostoma floridae] >gi 229       | Metabolic process | Other                                        |
| M3963   | hypothetical protein DAPPUDRAFT_52203 [Daphnia pulex]                  | Metabolic process | Other                                        |
| M423    | hypothetical protein BRAFLDRAFT_240825 [Branchiostoma floridae]        | Metabolic process | Other                                        |
| M4676   | SEL-1, putative [Ixodes scapularis] >gi 215509773 gb EEC19226.1        | Metabolic process | Other                                        |
| M56473  | PREDICTED: long-chain-fatty-acid--CoA ligase 4-like [Metaseiulus occi  | Metabolic process | Other                                        |
| M586    | Cytosolic Fe-S cluster assembly factor NUBP1-like protein [Crassostre  | Metabolic process | Other                                        |
| M58666  | PREDICTED: enoyl-CoA hydratase domain-containing protein 3, mito       | Metabolic process | Other                                        |
| M59111  | bifunctional protein fold [Culex quinquefasciatus] >gi 167881138 gl    | Metabolic process | Other                                        |
| M69422  |                                                                        | Metabolic process | Other                                        |
| M75363  | hypothetical protein DAPPUDRAFT_326816 [Daphnia pulex]                 | Metabolic process | Other                                        |
| M77166  | presqualene diphosphate phosphatase, putative [Pediculus humanus       | Metabolic process | Other                                        |
| M79948  | O-methyltransferase [Litopenaeus vannamei]                             | Metabolic process | Other                                        |
| M85316  | PREDICTED: probable GDP-L-fucose synthase-like [Nasonia vitripenni     | Metabolic process | Other                                        |
| M9184   | tubulin-specific chaperone D, putative [Pediculus humanus corporis]    | Metabolic process | Other                                        |
| N10697  | PREDICTED: hypothetical protein [Saccoglossus kowalevskii]             | Metabolic process | Other                                        |
| N13505  | Bromodomain-containing protein, putative [Pediculus humanus corp       | Metabolic process | Other                                        |
| N13655  | conserved hypothetical protein [Pediculus humanus corporis] >gi 21     | Metabolic process | Other                                        |
| N15469  | hypothetical protein TcasGA2_TC012288 [Tribolium castaneum]            | Metabolic process | Other                                        |
| N16244  | C-jun-amino-terminal kinase-interacting protein, putative [Pediculus   | Metabolic process | Other                                        |
| N16685  | hypothetical protein DAPPUDRAFT_299977 [Daphnia pulex]                 | Metabolic process | Other                                        |
| N19258  | hypothetical protein DAPPUDRAFT_309150 [Daphnia pulex]                 | Metabolic process | Other                                        |
| N19420  | ribosomal processing protein, putative [Ixodes scapularis] >gi 21549   | Metabolic process | Other                                        |
| N19613  | hypothetical protein DAPPUDRAFT_230717 [Daphnia pulex]                 | Metabolic process | Other                                        |
| N19941  | PREDICTED: riboflavin kinase-like [Ornithorhynchus anatinus]           | Metabolic process | Other                                        |
| N20453  | Regucalcin [Crassostrea gigas]                                         | Metabolic process | Other                                        |
| N20470  | PREDICTED: 1-acyl-sn-glycerol-3-phosphate acyltransferase gamma-li     | Metabolic process | Other                                        |
| N21023  | hypothetical protein [alpha proteobacterium SCGC AAA015-N04]           | Metabolic process | Other                                        |

| ID     | Annotation                                                                                | GO term           | Go child term               |
|--------|-------------------------------------------------------------------------------------------|-------------------|-----------------------------|
| N21214 | hypothetical protein DAPPUDRAFT_306991 [Daphnia pulex]                                    | Metabolic process | Other                       |
| N21331 | PREDICTED: NAD kinase-like isoform 3 [Nasonia vitripennis]                                | Metabolic process | Other                       |
| N21705 | myst histone acetyltransferase, putative [Pediculus humanus corporis]                     | Metabolic process | Other                       |
| N22445 | PREDICTED: LOW QUALITY PROTEIN: type I iodothyronine deiodinase                           | Metabolic process | Other                       |
| N22589 | hypothetical protein BRAFLDRAFT_208157 [Branchiostoma floridae]                           | Metabolic process | Other                       |
| N22811 | hypothetical protein BRAFLDRAFT_124342 [Branchiostoma floridae]                           | Metabolic process | Other                       |
| N23265 | PREDICTED: hypothetical protein [Saccoglossus kowalevskii]                                | Metabolic process | Other                       |
| N23543 | hypothetical protein DAPPUDRAFT_309070 [Daphnia pulex]                                    | Metabolic process | Other                       |
| N24903 | CG5567 [Drosophila melanogaster] >gi 7293934 gb AAF49296.1  C                             | Metabolic process | Other                       |
| N24917 | Histone-lysine N-methyltransferase trithorax [Camponotus floridanus]                      | Metabolic process | Other                       |
| N26485 | hypothetical protein DAPPUDRAFT_304984 [Daphnia pulex]                                    | Metabolic process | Other                       |
| N29121 | hypothetical protein YQE_12134, partial [Dendroctonus ponderosae]                         | Metabolic process | Other                       |
| N29192 | hypothetical protein DAPPUDRAFT_300082 [Daphnia pulex]                                    | Metabolic process | Other                       |
| N30152 | transcriptional regulator [Pseudomonas sp. PAMC 25886]                                    | Metabolic process | Other                       |
| N30559 | PREDICTED: similar to glucosyl/glucuronosyl transferases [Tribolium castaneum]            | Metabolic process | Other                       |
| N31112 | PREDICTED: long-chain-fatty-acid--CoA ligase 4-like isoform 2 [Nasonia vitripennis]       | Metabolic process | Other                       |
| N32142 | tRNA 2-thiocytidine biosynthesis protein ttcA [Lepeophtheirus salmo]                      | Metabolic process | Other                       |
| N34277 | conserved hypothetical protein [Pediculus humanus corporis] >gi 21                        | Metabolic process | Other                       |
| N34674 | PREDICTED: hypothetical protein LOC100117960 [Nasonia vitripennis]                        | Metabolic process | Other                       |
| N37250 | nucleoside-diphosphate-sugar epimerase [Phyllobacterium sp. YR53]                         | Metabolic process | Other                       |
| N38125 | hypothetical protein DAPPUDRAFT_335707 [Daphnia pulex]                                    | Metabolic process | Other                       |
| N41594 | hypothetical protein TRIADDRAFT_14880 [Trichoplax adhaerens] >gi                          | Metabolic process | Other                       |
| N47123 | glycerol-3-phosphate acyltransferase, putative [Pediculus humanus corporis]               | Metabolic process | Other                       |
| N47725 | carbonyl reductase [Daphnia pulex]                                                        | Metabolic process | Other                       |
| N53915 | hypothetical protein DAPPUDRAFT_306430 [Daphnia pulex]                                    | Metabolic process | Other                       |
| N55193 | hypothetical protein DAPPUDRAFT_316454 [Daphnia pulex]                                    | Metabolic process | Other                       |
| N56176 | hypothetical protein BRAFLDRAFT_85692 [Branchiostoma floridae] >                          | Metabolic process | Other                       |
| N57225 | hypothetical protein CAPTEDRAFT_110364 [Capitella teleta]                                 | Metabolic process | Other                       |
| N7968  | PREDICTED: Caenorhabditis Epoxide Hydrolase family member (ceeh)                          | Metabolic process | Other                       |
| N9777  | non-specific lipid-transfer protein-like [Riptortus pedestris]                            | Metabolic process | Other                       |
| E3651  | extracellular superoxide dismutase precursor [Pacifastacus leniusculus]                   | Metabolic process | Oxidation-reduction process |
| M13711 | extracellular superoxide dismutase precursor [Pacifastacus leniusculus]                   | Metabolic process | Oxidation-reduction process |
| M22256 | selenoprotein W2 [Artemia franciscana]                                                    | Metabolic process | Oxidation-reduction process |
| M33821 | ubiquitin [Schizosaccharomyces cryophilus OY26]                                           | Metabolic process | Oxidation-reduction process |
| M3840  | thioredoxin 2 [Xenopus laevis] >gi 27694724 gb AAH43794.1  Txn2                           | Metabolic process | Oxidation-reduction process |
| M4754  | hypothetical protein BRAFLDRAFT_125738 [Branchiostoma floridae]                           | Metabolic process | Oxidation-reduction process |
| M57279 | PREDICTED: dehydrogenase/reductase SDR family member 11 [Pseudomonas sp.]                 | Metabolic process | Oxidation-reduction process |
| M59486 | zinc finger protein DHHC domain containing protein, putative [Pediculus humanus corporis] | Metabolic process | Oxidation-reduction process |
| M62474 | cytochrome P450 [Litopenaeus vannamei]                                                    | Metabolic process | Oxidation-reduction process |
| M69744 | hypothetical protein CAPTEDRAFT_17949 [Capitella teleta]                                  | Metabolic process | Oxidation-reduction process |
| M77507 | NADPH--cytochrome P450 reductase [Camponotus floridanus]                                  | Metabolic process | Oxidation-reduction process |
| M77961 | nitric oxide synthase [Penaeus monodon]                                                   | Metabolic process | Oxidation-reduction process |
| M9570  | Gamma-butyrobetaine dioxygenase [Chelonia mydas]                                          | Metabolic process | Oxidation-reduction process |
| N10225 | hypothetical protein [Daphnia pulex]                                                      | Metabolic process | Oxidation-reduction process |
| N13595 | PREDICTED: similar to cytochrome P450 [Tribolium castaneum] >gi 2                         | Metabolic process | Oxidation-reduction process |
| N13621 | reductase, putative [Ixodes scapularis] >gi 215493148 gb EEC02785                         | Metabolic process | Oxidation-reduction process |
| N13735 | hypothetical protein BRAFLDRAFT_127740 [Branchiostoma floridae]                           | Metabolic process | Oxidation-reduction process |
| N13839 | PREDICTED: thioredoxin 2-like isoform 1 [Saccoglossus kowalevskii] >                      | Metabolic process | Oxidation-reduction process |
| N18513 | hypothetical protein DAPPUDRAFT_308494 [Daphnia pulex]                                    | Metabolic process | Oxidation-reduction process |
| N19275 | hypothetical protein DAPPUDRAFT_188248 [Daphnia pulex]                                    | Metabolic process | Oxidation-reduction process |
| N19570 | NADPH--cytochrome P450, putative [Pediculus humanus corporis] >g                          | Metabolic process | Oxidation-reduction process |
| N19620 | prostaglandin E synthase 2 [Penaeus monodon]                                              | Metabolic process | Oxidation-reduction process |
| N19752 | prostaglandin F synthase [Penaeus monodon]                                                | Metabolic process | Oxidation-reduction process |
| N20066 | hypothetical protein [Daphnia pulex]                                                      | Metabolic process | Oxidation-reduction process |
| N21156 | hypothetical protein DAPPUDRAFT_330720 [Daphnia pulex]                                    | Metabolic process | Oxidation-reduction process |
| N21262 | PREDICTED: SOrbitol DeHydrogenase family member (sodh-1)-like [Schistosoma mansoni]       | Metabolic process | Oxidation-reduction process |
| N21406 | cytochrome P450 [Bemisia tabaci]                                                          | Metabolic process | Oxidation-reduction process |
| N21510 | senecionine N-oxygenase, putative [Pediculus humanus corporis] >gi                        | Metabolic process | Oxidation-reduction process |
| N22067 | PREDICTED: FAD-linked sulfhydryl oxidase ALR [Falco cherrug]                              | Metabolic process | Oxidation-reduction process |
| N22279 | Dehydrogenase/reductase SDR family member 11 [Salmo salar] >gi 2                          | Metabolic process | Oxidation-reduction process |
| N23505 | hypothetical protein DAPPUDRAFT_49503 [Daphnia pulex]                                     | Metabolic process | Oxidation-reduction process |
| N26026 | hypothetical protein SINV_06374 [Solenopsis invicta]                                      | Metabolic process | Oxidation-reduction process |
| N30108 | myosin heavy chain type 1 [Litopenaeus vannamei]                                          | Metabolic process | Oxidation-reduction process |
| N35632 | Mesorhizobium opportunistum WSM2075, complete genome                                      | Metabolic process | Oxidation-reduction process |

| ID     | Annotation                                                         | GO term           | Go child term               |
|--------|--------------------------------------------------------------------|-------------------|-----------------------------|
| N38917 | prostaglandin F synthase [Penaeus monodon]                         | Metabolic process | Oxidation-reduction process |
| N44133 | hypothetical protein DAPPUDRAFT_42950 [Daphnia pulex]              | Metabolic process | Oxidation-reduction process |
| N46564 | hypothetical protein BRAFLDRAFT_202728 [Branchiostoma floridae]    | Metabolic process | Oxidation-reduction process |
| N6077  | prostaglandin reductase 1 [Penaeus monodon]                        | Metabolic process | Oxidation-reduction process |
| N8447  | calcineurin B, putative [Ixodes scapularis] >gi 215493899 gb EEC03 | Metabolic process | Oxidation-reduction process |
| N8450  | calcineurin B, putative [Ixodes scapularis] >gi 215493899 gb EEC03 | Metabolic process | Oxidation-reduction process |
| N8487  | hypothetical protein DAPPUDRAFT_302851 [Daphnia pulex]             | Metabolic process | Oxidation-reduction process |

## Nucleic acid metabolism

|         |                                                                        |                         |                                           |
|---------|------------------------------------------------------------------------|-------------------------|-------------------------------------------|
| M88105  | PREDICTED: hypothetical protein [Saccoglossus kowalevskii]             | Nucleic acid metabolism | DNA metabolic process                     |
| M1844   | conserved hypothetical protein [Pediculus humanus corporis] >gi 21     | Nucleic acid metabolism | DNA replication                           |
| M18552  | PREDICTED: Nasonia vitripennis ribonucleoside-diphosphate reducta      | Nucleic acid metabolism | DNA replication                           |
| M2403   | hypothetical protein DAPPUDRAFT_300656 [Daphnia pulex]                 | Nucleic acid metabolism | DNA replication                           |
| M4642   | PREDICTED: mediator of RNA polymerase II transcription subunit 20-     | Nucleic acid metabolism | DNA replication                           |
| M5057   | unknown [Dendroctonus ponderosae] >gi 478259673 gb ENN7951             | Nucleic acid metabolism | DNA replication                           |
| M56059  | hypothetical protein TcasGA2_TC000123 [Tribolium castaneum]            | Nucleic acid metabolism | DNA replication                           |
| M69392  | PREDICTED: CCR4-NOT transcription complex subunit 2 isoform X1 [C      | Nucleic acid metabolism | DNA replication                           |
| M88273  | proliferating cell nuclear antigen [Litopenaeus vannamei] >gi 33972    | Nucleic acid metabolism | DNA replication                           |
| N13117  | PREDICTED: similar to AGAP007416-PA [Tribolium castaneum] >gi 2        | Nucleic acid metabolism | DNA replication                           |
| N15339  | pol [Schistosoma mansoni]                                              | Nucleic acid metabolism | DNA replication                           |
| N25699  | PREDICTED: uncharacterized protein LOC101853172 [Aplysia californ      | Nucleic acid metabolism | DNA replication                           |
| M104450 | reverse transcriptase [Nullibrotheas allenii]                          | Nucleic acid metabolism | Regulation of gene expression             |
| M108095 | PREDICTED: zinc finger protein 11B-like [Oryctolagus cuniculus]        | Nucleic acid metabolism | Regulation of gene expression             |
| M16302  | ETS domain-containing protein Elk-4, putative [Ixodes scapularis] >gi  | Nucleic acid metabolism | Regulation of gene expression             |
| M28818  | PREDICTED: zinc finger protein 160-like, partial [Sarcophilus harrisi] | Nucleic acid metabolism | Regulation of gene expression             |
| M3783   | PREDICTED: enhancer of split mgamma protein-like [Apis mellifera] >    | Nucleic acid metabolism | Regulation of gene expression             |
| M4449   | Lian-Aa1 retrotransposon protein [Aedes aegypti]                       | Nucleic acid metabolism | Regulation of gene expression             |
| M55413  | hypothetical protein CAPTEDRAFT_212468 [Capitella teleta]              | Nucleic acid metabolism | Regulation of gene expression             |
| M57032  | PREDICTED: poly(A) polymerase gamma [Apis florea]                      | Nucleic acid metabolism | Regulation of gene expression             |
| M59084  | TPA: endonuclease-reverse transcriptase [Schistosoma mansoni]          | Nucleic acid metabolism | Regulation of gene expression             |
| M6323   | hypothetical protein BRAFLDRAFT_114861 [Branchiostoma floridae]        | Nucleic acid metabolism | Regulation of gene expression             |
| M66830  | hypothetical protein YQE_12440, partial [Dendroctonus ponderosae]      | Nucleic acid metabolism | Regulation of gene expression             |
| M68024  | hypothetical protein CRE_19860 [Caenorhabditis remanei] >gi 3082       | Nucleic acid metabolism | Regulation of gene expression             |
| M71990  | endonuclease-reverse transcriptase [Bombyx mori]                       | Nucleic acid metabolism | Regulation of gene expression             |
| M89294  | PREDICTED: zinc finger protein 558 [Felis catus]                       | Nucleic acid metabolism | Regulation of gene expression             |
| M91019  | scalloped protein, partial [Parhyale hawaiensis]                       | Nucleic acid metabolism | Regulation of gene expression             |
| N13057  | PREDICTED: uncharacterized protein LOC100878829 [Megachile rotu        | Nucleic acid metabolism | Regulation of gene expression             |
| N14443  | protein groucho, putative [Pediculus humanus corporis] >gi 212511      | Nucleic acid metabolism | Regulation of gene expression             |
| N18441  | PREDICTED: LOW QUALITY PROTEIN: ets DNA-binding protein pokkur         | Nucleic acid metabolism | Regulation of gene expression             |
| N19117  |                                                                        | Nucleic acid metabolism | Regulation of gene expression             |
| N19683  | TPA: endonuclease-reverse transcriptase [Schistosoma mansoni]          | Nucleic acid metabolism | Regulation of gene expression             |
| N19739  |                                                                        | Nucleic acid metabolism | Regulation of gene expression             |
| N20125  | Hepatic leukemia factor [Crassostrea gigas]                            | Nucleic acid metabolism | Regulation of gene expression             |
| N22594  | RuvB-like protein 2 [Penaeus monodon]                                  | Nucleic acid metabolism | Regulation of gene expression             |
| N22843  | cAMP response element-binding protein [Polyrhachis vicina]             | Nucleic acid metabolism | Regulation of gene expression             |
| N24657  | endonuclease/reverse transcriptase [Branchiostoma floridae]            | Nucleic acid metabolism | Regulation of gene expression             |
| N26250  | transcriptional regulator [Phyllobacterium sp. YR531] >gi 39821151     | Nucleic acid metabolism | Regulation of gene expression             |
| N28156  | mrg-binding protein, putative [Ixodes scapularis] >gi 215507567 gb     | Nucleic acid metabolism | Regulation of gene expression             |
| N28353  | PREDICTED: RNA-directed DNA polymerase from mobile element joc         | Nucleic acid metabolism | Regulation of gene expression             |
| N33433  | PREDICTED: similar to TFIIA [Tribolium castaneum] >gi 270013142 g      | Nucleic acid metabolism | Regulation of gene expression             |
| N36361  | PREDICTED: zinc finger protein 391 isoform X1 [Mustela putorius furc   | Nucleic acid metabolism | Regulation of gene expression             |
| N38485  | enhancer of split mgamma protein-like protein [Daphnia pulex]          | Nucleic acid metabolism | Regulation of gene expression             |
| N41657  | conserved hypothetical protein [Ixodes scapularis] >gi 215502246 g     | Nucleic acid metabolism | Regulation of gene expression             |
| N43299  | Ecdysone-induced protein 74EF isoform B [Camponotus floridanus]        | Nucleic acid metabolism | Regulation of gene expression             |
| N53807  | ETS factor [Trichinella spiralis] >gi 316978761 gb EFV61692.1  ETS     | Nucleic acid metabolism | Regulation of gene expression             |
| N60094  | RecName: Full=Zinc finger Y-chromosomal protein 1; Short=ZFY-1 >gi     | Nucleic acid metabolism | Regulation of gene expression             |
| N9039   | conserved hypothetical protein [Pediculus humanus corporis] >gi 21     | Nucleic acid metabolism | Regulation of gene expression             |
| M10251  | hypothetical protein TcasGA2_TC012014 [Tribolium castaneum]            | Nucleic acid metabolism | Regulation of gene expression, epigenetic |
| M3      | Xenopus laevis similar to histone deacetylase 2, mRNA (cDNA clone I    | Nucleic acid metabolism | Regulation of gene expression, epigenetic |
| M56146  |                                                                        | Nucleic acid metabolism | Regulation of gene expression, epigenetic |
| N13139  |                                                                        | Nucleic acid metabolism | Regulation of gene expression, epigenetic |
| N13941  |                                                                        | Nucleic acid metabolism | Regulation of gene expression, epigenetic |
| N22640  |                                                                        | Nucleic acid metabolism | Regulation of gene expression, epigenetic |
| N23215  | programmed cell death-involved protein, putative [Ixodes scapularis]   | Nucleic acid metabolism | Regulation of gene expression, epigenetic |



| ID     | Annotation                                                           | GO term                 | Go child term                             |
|--------|----------------------------------------------------------------------|-------------------------|-------------------------------------------|
| N23757 | hypothetical protein DAPPUDRAFT_317395 [Daphnia pulex]               | Nucleic acid metabolism | Regulation of gene expression, epigenetic |
| N44273 | GD13897 [Drosophila simulans] >gi 194195768 gb EDX09344.1            | Nucleic acid metabolism | Regulation of gene expression, epigenetic |
| M11735 |                                                                      | Nucleic acid metabolism | RNA metabolic process                     |
| M12614 | PREDICTED: snurportin-1-like [Aplysia californica]                   | Nucleic acid metabolism | RNA metabolic process                     |
| M15533 | PREDICTED: ribonucleases P/MRP protein subunit POP1 isoform X2 [I    | Nucleic acid metabolism | RNA metabolic process                     |
| M18282 | PREDICTED: tRNA-splicing endonuclease subunit Sen34-like [Apis me    | Nucleic acid metabolism | RNA metabolic process                     |
| M2617  | hypothetical protein CAPTEDRAFT_73288, partial [Capitella teleta]    | Nucleic acid metabolism | RNA metabolic process                     |
| M3936  | hypothetical protein DAPPUDRAFT_299967 [Daphnia pulex]               | Nucleic acid metabolism | RNA metabolic process                     |
| M4435  | hypothetical protein CAPTEDRAFT_220697 [Capitella teleta]            | Nucleic acid metabolism | RNA metabolic process                     |
| M64830 | PREDICTED: similar to spliceosome associated protein [Tribolium cast | Nucleic acid metabolism | RNA metabolic process                     |
| M88815 | hypothetical protein TcasGA2_TC009040 [Tribolium castaneum]          | Nucleic acid metabolism | RNA metabolic process                     |
| M96360 | hypothetical protein DAPPUDRAFT_305992 [Daphnia pulex]               | Nucleic acid metabolism | RNA metabolic process                     |
| M9958  | PREDICTED: cytoplasmic tRNA 2-thiolation protein 1 isoform X2 [Dan   | Nucleic acid metabolism | RNA metabolic process                     |
| N20615 | Plasmodium knowlesi strain H fibrillarin (PKH_133980) mRNA, compl    | Nucleic acid metabolism | RNA metabolic process                     |
| N20657 | hypothetical protein DAPPUDRAFT_325988 [Daphnia pulex]               | Nucleic acid metabolism | RNA metabolic process                     |
| N20737 | hypothetical protein DAPPUDRAFT_303058 [Daphnia pulex]               | Nucleic acid metabolism | RNA metabolic process                     |
| N22292 | AGAP004370-PA [Anopheles gambiae str. PEST] >gi 157017271 gb         | Nucleic acid metabolism | RNA metabolic process                     |
| N22415 | PREDICTED: transcription elongation factor SPT5-like [Megachile rotu | Nucleic acid metabolism | RNA metabolic process                     |
| N25018 | PREDICTED: cleavage and polyadenylation specificity factor subunit 5 | Nucleic acid metabolism | RNA metabolic process                     |
| N25181 | pre-mRNA-splicing factor ATP-dependent RNA helicase PRP22, putat     | Nucleic acid metabolism | RNA metabolic process                     |
| N32178 | CDK5 regulatory subunit-associated protein, putative [Ixodes scapula | Nucleic acid metabolism | RNA metabolic process                     |
| N32761 | Nucleolar protein 14 [Chelonia mydas]                                | Nucleic acid metabolism | RNA metabolic process                     |
| N38517 | hypothetical protein DAPPUDRAFT_304474 [Daphnia pulex]               | Nucleic acid metabolism | RNA metabolic process                     |
| N39879 | hypothetical protein BRAFLDRAFT_209586 [Branchiostoma floridae]      | Nucleic acid metabolism | RNA metabolic process                     |
| M67189 | hypothetical protein BRAFLDRAFT_114926 [Branchiostoma floridae]      | Nucleic acid metabolism | Transcription, DNA-dependent              |
| N21123 | PREDICTED: DNA-directed RNA polymerase I subunit RPA43-like [Nas     | Nucleic acid metabolism | Transcription, DNA-dependent              |

## Protein metabolism

|         |                                                                      |                    |                                       |
|---------|----------------------------------------------------------------------|--------------------|---------------------------------------|
| M101513 | hypothetical protein BRAFLDRAFT_120334 [Branchiostoma floridae]      | Protein metabolism | Cellular protein modification process |
| M105185 | PREDICTED: E3 ubiquitin-protein ligase UBR4 [Melopsittacus undulat   | Protein metabolism | Cellular protein modification process |
| M15270  | tyrosine-protein kinase Src42A, putative [Pediculus humanus corpori  | Protein metabolism | Cellular protein modification process |
| M1547   |                                                                      | Protein metabolism | Cellular protein modification process |
| M16714  |                                                                      | Protein metabolism | Cellular protein modification process |
| M17927  | PREDICTED: Bombus terrestris dual specificity mitogen-activated pro  | Protein metabolism | Cellular protein modification process |
| M182    | Putative protein phosphatase [Acromyrmex echinator]                  | Protein metabolism | Cellular protein modification process |
| M2345   | PREDICTED: Megachile rotundata cyclin-dependent kinase 1-like (LO    | Protein metabolism | Cellular protein modification process |
| M2932   |                                                                      | Protein metabolism | Cellular protein modification process |
| M58599  | projectin [Procambarus clarkii]                                      | Protein metabolism | Cellular protein modification process |
| M59923  | hypothetical protein BRAFLDRAFT_63881 [Branchiostoma floridae] >     | Protein metabolism | Cellular protein modification process |
| M63511  | PREDICTED: phosphatidylinositol N-acetylglucosaminyltransferase su   | Protein metabolism | Cellular protein modification process |
| M66217  | Diphthamide biosynthesis protein 2 [Dicentrarchus labrax]            | Protein metabolism | Cellular protein modification process |
| M73098  |                                                                      | Protein metabolism | Cellular protein modification process |
| M74771  | hypothetical protein DAPPUDRAFT_320464 [Daphnia pulex]               | Protein metabolism | Cellular protein modification process |
| M83349  | hypothetical protein D910_02598 [Dendroctonus ponderosae]            | Protein metabolism | Cellular protein modification process |
| M84527  | projectin [Procambarus clarkii]                                      | Protein metabolism | Cellular protein modification process |
| M9345   | hypothetical protein DAPPUDRAFT_52407 [Daphnia pulex]                | Protein metabolism | Cellular protein modification process |
| N11830  |                                                                      | Protein metabolism | Cellular protein modification process |
| N11990  | PREDICTED: similar to CG1973 CG1973-PA [Tribolium castaneum]         | Protein metabolism | Cellular protein modification process |
| N12213  | PREDICTED: hypothetical protein LOC100118283 [Nasonia vitripenni:    | Protein metabolism | Cellular protein modification process |
| N13007  | checkpoint kinase 1 [Daphnia pulex]                                  | Protein metabolism | Cellular protein modification process |
| N1320   | hypothetical protein DAPPUDRAFT_306600 [Daphnia pulex]               | Protein metabolism | Cellular protein modification process |
| N1323   | hypothetical protein DAPPUDRAFT_306600 [Daphnia pulex]               | Protein metabolism | Cellular protein modification process |
| N18288  | casein kinase 1 epsilon [Eurydice pulchra]                           | Protein metabolism | Cellular protein modification process |
| N18309  | hypothetical protein DAPPUDRAFT_52407 [Daphnia pulex]                | Protein metabolism | Cellular protein modification process |
| N18354  | hypothetical protein KGM_05346 [Danaus plexippus]                    | Protein metabolism | Cellular protein modification process |
| N18824  | Ser/Thr protein phosphatase, putative [Ixodes scapularis] >gi 21550: | Protein metabolism | Cellular protein modification process |
| N19889  | darkener of apricot-like protein [Daphnia pulex]                     | Protein metabolism | Cellular protein modification process |
| N20036  | hypothetical protein DAPPUDRAFT_308742 [Daphnia pulex]               | Protein metabolism | Cellular protein modification process |
| N20067  |                                                                      | Protein metabolism | Cellular protein modification process |
| N21078  | HemK methyltransferase family member 1 [Harpegnathos saltator]       | Protein metabolism | Cellular protein modification process |
| N21177  | hypothetical protein CAPTEDRAFT_147624 [Capitella teleta]            | Protein metabolism | Cellular protein modification process |
| N23368  | hypothetical protein DAPPUDRAFT_194528 [Daphnia pulex]               | Protein metabolism | Cellular protein modification process |
| N24752  | Drosophila yakuba GE21090 (Dyak\GE21090), mRNA                       | Protein metabolism | Cellular protein modification process |
| N28081  | PREDICTED: Apis florea serine/threonine-protein kinase tousled-like  | Protein metabolism | Cellular protein modification process |

| ID      | Annotation                                                             | GO term            | Go child term                         |
|---------|------------------------------------------------------------------------|--------------------|---------------------------------------|
| N28784  | protein purity of essence, putative [Pediculus humanus corporis] >gi   | Protein metabolism | Cellular protein modification process |
| N33066  | PREDICTED: Apis mellifera tricornered (trc), mRNA                      | Protein metabolism | Cellular protein modification process |
| N33379  | PREDICTED: similar to Nedd4 CG7555-PC [Tribolium castaneum]            | Protein metabolism | Cellular protein modification process |
| N34569  | PREDICTED: tyrosine-protein kinase Fer [Sorex araneus]                 | Protein metabolism | Cellular protein modification process |
| N36911  | CMGC/DYRK/PRP4 protein kinase [Loa loa]                                | Protein metabolism | Cellular protein modification process |
| N38634  | PREDICTED: probable deoxyhypusine synthase-like [Megachile rotun       | Protein metabolism | Cellular protein modification process |
| N40247  | activin receptor type I, putative [Aedes aegypti] >gi 108874587 gb     | Protein metabolism | Cellular protein modification process |
| N43819  | PREDICTED: vascular endothelial growth factor receptor 1-like [Apis f  | Protein metabolism | Cellular protein modification process |
| N44456  | hypothetical protein DAPPUDRAFT_304762 [Daphnia pulex]                 | Protein metabolism | Cellular protein modification process |
| N19772  |                                                                        | Protein metabolism | Macromolecular complex assembly       |
| N23035  | PREDICTED: similar to cytochrome c oxidase assembly protein cox11      | Protein metabolism | Macromolecular complex assembly       |
| M70652  | procollagen-lysine2-oxoglutarate 5-dioxygenase [Schistosoma mansc      | Protein metabolism | Other                                 |
| M11564  | PREDICTED: similar to DnaJ (Hsp40) homolog, subfamily C, member 1      | Protein metabolism | Protein folding                       |
| M56202  | GK11959 [Drosophila willistoni] >gi 194166340 gb EDW81241.1  G         | Protein metabolism | Protein folding                       |
| M65353  | related to FPR2-FK506/rapamycin-binding protein of the ER [Ustilagc    | Protein metabolism | Protein folding                       |
| M67058  | Paracyclopsina nana heat shock protein 90 mRNA, complete cds           | Protein metabolism | Protein folding                       |
| N13783  | RecName: Full=Peptidyl-prolyl cis-trans isomerase B; Short=PPlase B;   | Protein metabolism | Protein folding                       |
| N19207  | hypothetical protein DAPPUDRAFT_99108 [Daphnia pulex]                  | Protein metabolism | Protein folding                       |
| N19298  |                                                                        | Protein metabolism | Protein folding                       |
| N27358  | PREDICTED: peptidyl-prolyl cis-trans isomerase-like 3-like isoform 1 [ | Protein metabolism | Protein folding                       |
| N35673  | hypothetical protein BATDEDRAFT_35110 [Batrachochytrium dendrc         | Protein metabolism | Protein folding                       |
| N38447  | hypothetical protein BRAFLDRAFT_114918 [Branchiostoma floridae]        | Protein metabolism | Protein folding                       |
| M10527  | conserved hypothetical protein [Pediculus humanus corporis] >gi 21     | Protein metabolism | Proteolysis                           |
| M108428 | hypothetical protein DAPPUDRAFT_303500 [Daphnia pulex]                 | Protein metabolism | Proteolysis                           |
| M11130  |                                                                        | Protein metabolism | Proteolysis                           |
| M113044 |                                                                        | Protein metabolism | Proteolysis                           |
| M12906  | hypothetical protein DAPPUDRAFT_315872 [Daphnia pulex]                 | Protein metabolism | Proteolysis                           |
| M13910  | cathepsin D-like protein [Homarus americanus]                          | Protein metabolism | Proteolysis                           |
| M18434  | CUB-serine protease [Panulirus argus]                                  | Protein metabolism | Proteolysis                           |
| M19739  | CUB-serine protease [Panulirus argus]                                  | Protein metabolism | Proteolysis                           |
| M20696  | masquerade-like protein [Pacifastacus leniusculus]                     | Protein metabolism | Proteolysis                           |
| M2214   |                                                                        | Protein metabolism | Proteolysis                           |
| M22508  | serine protease [Penaeus monodon]                                      | Protein metabolism | Proteolysis                           |
| M229    |                                                                        | Protein metabolism | Proteolysis                           |
| M23676  | PREDICTED: venom serine protease 34-like [Bombus terrestris]           | Protein metabolism | Proteolysis                           |
| M23700  | hypothetical protein CAPTEDRAFT_206264 [Capitella teleta]              | Protein metabolism | Proteolysis                           |
| M23774  | masquerade-like protein, partial [Armadillidium vulgare]               | Protein metabolism | Proteolysis                           |
| M23838  | masquerade-like serine proteinase-like protein 3 [Penaeus monodon      | Protein metabolism | Proteolysis                           |
| M241    | hypothetical protein TcasGA2_TC013516 [Tribolium castaneum]            | Protein metabolism | Proteolysis                           |
| M25061  | masquerade-like protein [Pacifastacus leniusculus]                     | Protein metabolism | Proteolysis                           |
| M29587  | masquerade-like protein [Pacifastacus leniusculus]                     | Protein metabolism | Proteolysis                           |
| M3147   | PREDICTED: N-acetylated alpha-linked acidic dipeptidase 2-like [Sacc   | Protein metabolism | Proteolysis                           |
| M3293   | masquerade-like protein [Pacifastacus leniusculus]                     | Protein metabolism | Proteolysis                           |
| M3294   | hypothetical protein DAPPUDRAFT_316896 [Daphnia pulex]                 | Protein metabolism | Proteolysis                           |
| M3619   | CUB-serine protease [Panulirus argus]                                  | Protein metabolism | Proteolysis                           |
| M4677   | hypothetical protein DAPPUDRAFT_307535 [Daphnia pulex]                 | Protein metabolism | Proteolysis                           |
| M47110  | collagenolytic serine protease [Paralithodes camtschaticus]            | Protein metabolism | Proteolysis                           |
| M56778  | PREDICTED: proclotting enzyme [Nasonia vitripennis]                    | Protein metabolism | Proteolysis                           |
| M61800  | PREDICTED: protein SpAN-like [Strongylocentrotus purpuratus]           | Protein metabolism | Proteolysis                           |
| M61855  | masquerade-like protein [Pacifastacus leniusculus]                     | Protein metabolism | Proteolysis                           |
| M6356   | hypothetical protein DAPPUDRAFT_305917 [Daphnia pulex]                 | Protein metabolism | Proteolysis                           |
| M66918  | PREDICTED: hypothetical protein [Saccoglossus kowalevskii]             | Protein metabolism | Proteolysis                           |
| M67539  |                                                                        | Protein metabolism | Proteolysis                           |
| M67909  | ubiquitin conjugation factor E4 B, putative [Pediculus humanus corp    | Protein metabolism | Proteolysis                           |
| M75292  | PREDICTED: N-acetylated-alpha-linked acidic dipeptidase 2-like [Stroi  | Protein metabolism | Proteolysis                           |
| M75323  | hypothetical protein DAPPUDRAFT_303785 [Daphnia pulex]                 | Protein metabolism | Proteolysis                           |
| M8106   | PREDICTED: serine carboxypeptidase 1-like [Saccoglossus kowalevski     | Protein metabolism | Proteolysis                           |
| M83540  | Ubiquitin carboxyl-terminal hydrolase 32 [Crassostrea gigas]           | Protein metabolism | Proteolysis                           |
| M85248  | hypothetical protein DAPPUDRAFT_314716 [Daphnia pulex]                 | Protein metabolism | Proteolysis                           |
| M931    | protease [Homarus americanus]                                          | Protein metabolism | Proteolysis                           |
| M9318   | anaphase-promoting complex subunit, putative [Pediculus humanus        | Protein metabolism | Proteolysis                           |
| M94727  | hypothetical protein DAPPUDRAFT_311166 [Daphnia pulex]                 | Protein metabolism | Proteolysis                           |
| M96397  | PREDICTED: similar to trypsin-like serine protease [Tribolium castane  | Protein metabolism | Proteolysis                           |
| M97028  | Protein CBR-NAS-4 [Caenorhabditis briggsae]                            | Protein metabolism | Proteolysis                           |

| ID      | Annotation                                                              | GO term            | Go child term                          |
|---------|-------------------------------------------------------------------------|--------------------|----------------------------------------|
| N10435  | Aminopeptidase N precursor, putative [Pediculus humanus corporis]       | Protein metabolism | Proteolysis                            |
| N10456  | PREDICTED: carboxypeptidase B-like [Apis florea]                        | Protein metabolism | Proteolysis                            |
| N11966  | Cytosolic non-specific dipeptidase [Lepeophtheirus salmonis]            | Protein metabolism | Proteolysis                            |
| N12001  | PREDICTED: cullin-4B-like [Nasonia vitripennis]                         | Protein metabolism | Proteolysis                            |
| N12203  | hypothetical protein TcasGA2_TC014587 [Tribolium castaneum]             | Protein metabolism | Proteolysis                            |
| N13043  | masquerade-like protein [Pacifastacus leniusculus]                      | Protein metabolism | Proteolysis                            |
| N13119  |                                                                         | Protein metabolism | Proteolysis                            |
| N13604  | ubiquitin protein ligase [Ixodes scapularis] >gi 215497661 gb EEC07     | Protein metabolism | Proteolysis                            |
| N1431   | PREDICTED: protein SpAN-like [Strongylocentrotus purpuratus]            | Protein metabolism | Proteolysis                            |
| N16740  | truncated cathepsin A [Eriocheir sinensis]                              | Protein metabolism | Proteolysis                            |
| N17787  |                                                                         | Protein metabolism | Proteolysis                            |
| N18522  |                                                                         | Protein metabolism | Proteolysis                            |
| N19540  |                                                                         | Protein metabolism | Proteolysis                            |
| N19798  | hypothetical protein DAPPUDRAFT_311166 [Daphnia pulex]                  | Protein metabolism | Proteolysis                            |
| N19964  | masquerade-like serine proteinase-like protein 2 [Penaeus monodon]      | Protein metabolism | Proteolysis                            |
| N20895  | GG21285 [Drosophila erecta] >gi 257096534 sp B3P3J9.1 HTRA2_            | Protein metabolism | Proteolysis                            |
| N21404  | hypothetical protein DAPPUDRAFT_216354 [Daphnia pulex]                  | Protein metabolism | Proteolysis                            |
| N21719  | hypothetical protein DAPPUDRAFT_330318 [Daphnia pulex]                  | Protein metabolism | Proteolysis                            |
| N24486  | CUB-serine protease [Panulirus argus]                                   | Protein metabolism | Proteolysis                            |
| N24880  | hypothetical protein DAPPUDRAFT_63727 [Daphnia pulex]                   | Protein metabolism | Proteolysis                            |
| N25628  | hypothetical protein DAPPUDRAFT_311166 [Daphnia pulex]                  | Protein metabolism | Proteolysis                            |
| N26364  | CUB-serine protease [Panulirus argus]                                   | Protein metabolism | Proteolysis                            |
| N26789  | angiotensin converting enzyme [Pontastacus leptodactylus]               | Protein metabolism | Proteolysis                            |
| N27064  | Aminopeptidase N precursor, putative [Pediculus humanus corporis]       | Protein metabolism | Proteolysis                            |
| N27897  | hypothetical protein DAPPUDRAFT_311166 [Daphnia pulex]                  | Protein metabolism | Proteolysis                            |
| N36660  | hypothetical protein DAPPUDRAFT_39648 [Daphnia pulex]                   | Protein metabolism | Proteolysis                            |
| N39388  | hypothetical protein YQE_02808, partial [Dendroctonus ponderosae]       | Protein metabolism | Proteolysis                            |
| N40575  | PREDICTED: LOW QUALITY PROTEIN: transmembrane protease serine           | Protein metabolism | Proteolysis                            |
| N4062   | hypothetical protein DAPPUDRAFT_216354 [Daphnia pulex]                  | Protein metabolism | Proteolysis                            |
| N43537  | hypothetical protein D910_11568 [Dendroctonus ponderosae]               | Protein metabolism | Proteolysis                            |
| N44388  | hypothetical protein TRIADDRAFT_61245 [Trichoplax adhaerens] >gi        | Protein metabolism | Proteolysis                            |
| N4645   | mg274 gene product [Megavirus chiliensis] >gi 350611889 gb AEQ:         | Protein metabolism | Proteolysis                            |
| N46573  | hypothetical protein DAPPUDRAFT_316225 [Daphnia pulex]                  | Protein metabolism | Proteolysis                            |
| N48713  | prophenoloxidase activating factor [Litopenaeus vannamei]               | Protein metabolism | Proteolysis                            |
| N48852  | PREDICTED: proclotting enzyme-like [Apis florea]                        | Protein metabolism | Proteolysis                            |
| N50173  | Kazal-type serine proteinase inhibitor 1 [Fenneropenaeus chinensis]     | Protein metabolism | Proteolysis                            |
| N51339  |                                                                         | Protein metabolism | Proteolysis                            |
| N51804  |                                                                         | Protein metabolism | Proteolysis                            |
| N5621   | cathepsin B [Litopenaeus vannamei]                                      | Protein metabolism | Proteolysis                            |
| N61303  | hypothetical protein DAPPUDRAFT_307810 [Daphnia pulex]                  | Protein metabolism | Proteolysis                            |
| N62093  | masquerade, isoform C [Drosophila melanogaster] >gi 440215292 g         | Protein metabolism | Proteolysis                            |
| N6666   | tick legumain [Haemaphysalis longicornis]                               | Protein metabolism | Proteolysis                            |
| N8406   | hypothetical protein YQE_02808, partial [Dendroctonus ponderosae]       | Protein metabolism | Proteolysis                            |
| N9705   | calpain B [Gecarcinus lateralis]                                        | Protein metabolism | Proteolysis                            |
| M12627  |                                                                         | Protein metabolism | Regulation of translational elongation |
| M1483   | PREDICTED: transcription elongation factor S-II-like [Metaseiulus occi  | Protein metabolism | Regulation of translational elongation |
| M4937   | ORM1-like protein 3 [Danio rerio] >gi 81174971 sp Q5XJR6.1 ORM          | Protein metabolism | Regulation of translational elongation |
| M1361   | hypothetical protein CAPTEDRAFT_202452 [Capitella teleta]               | Protein metabolism | Regulation of translational initiation |
| M19177  | Euphausia superba large subunit ribosomal RNA gene, partial sequen      | Protein metabolism | Regulation of translational initiation |
| M2244   | PREDICTED: eukaryotic translation initiation factor 4E member 3-like    | Protein metabolism | Regulation of translational initiation |
| M720    | eukaryotic translation initiation factor 4E type, putative [Pediculus h | Protein metabolism | Regulation of translational initiation |
| N24811  | eIF2B-alpha protein [Daphnia pulex]                                     | Protein metabolism | Regulation of translational initiation |
| E2956   |                                                                         | Protein metabolism | Ribosome biogenesis                    |
| M101760 | ribosomal protein S7 [Procambarus clarkii]                              | Protein metabolism | Ribosome biogenesis                    |
| M113541 | PREDICTED: ribosomal protein L23-like [Saccoglossus kowalevskii]        | Protein metabolism | Ribosome biogenesis                    |
| M118    |                                                                         | Protein metabolism | Ribosome biogenesis                    |
| M18773  | ribosomal protein L26 [Penaeus monodon] >gi 124295601 gb ABNC           | Protein metabolism | Ribosome biogenesis                    |
| M19054  | PREDICTED: mRNA turnover protein 4 homolog [Equus caballus]             | Protein metabolism | Ribosome biogenesis                    |
| M21285  | RecName: Full=60S ribosomal protein L15 >gi 4530186 gb AAD219:          | Protein metabolism | Ribosome biogenesis                    |
| M21399  | 60S ribosomal protein L6 [Coptotermes formosanus]                       | Protein metabolism | Ribosome biogenesis                    |
| M261    | Probable 39S ribosomal protein L49, mitochondrial [Lepeophtheirus       | Protein metabolism | Ribosome biogenesis                    |
| M31399  | hypothetical protein D910_05262 [Dendroctonus ponderosae]               | Protein metabolism | Ribosome biogenesis                    |
| M36704  | ribosomal protein L35 [Procambarus clarkii]                             | Protein metabolism | Ribosome biogenesis                    |
| M60899  | ribosomal protein S19 [Procambarus clarkii]                             | Protein metabolism | Ribosome biogenesis                    |

| ID     | Annotation                                                                  | GO term            | Go child term       |
|--------|-----------------------------------------------------------------------------|--------------------|---------------------|
| M75744 | ribosomal protein L36 [ <i>Procambarus clarkii</i> ]                        | Protein metabolism | Ribosome biogenesis |
| M80007 | PREDICTED: 40S ribosomal protein S27-like, partial [ <i>Columba livia</i> ] | Protein metabolism | Ribosome biogenesis |
| M8234  | hypothetical protein DAPPUDRAFT_300212 [ <i>Daphnia pulex</i> ]             | Protein metabolism | Ribosome biogenesis |
| M89860 | ribosomal protein L26 [ <i>Panaeus monodon</i> ] >gi 124295601 gb ABN       | Protein metabolism | Ribosome biogenesis |
| N13567 | ribosomal protein L24 [ <i>Azumapecten farreri</i> ]                        | Protein metabolism | Ribosome biogenesis |
| N16052 | ribosomal protein rpl35a [ <i>Lineus viridis</i> ]                          | Protein metabolism | Ribosome biogenesis |
| N20156 | hypothetical protein DAPPUDRAFT_308176 [ <i>Daphnia pulex</i> ]             | Protein metabolism | Ribosome biogenesis |
| N20866 | PREDICTED: 39S ribosomal protein L3, mitochondrial-like [ <i>Nasonia vi</i> | Protein metabolism | Ribosome biogenesis |
| N21816 | AGAP001738-PA [ <i>Anopheles gambiae</i> str. PEST] >gi 157012593 gb        | Protein metabolism | Ribosome biogenesis |
| N30585 | hypothetical protein DAPPUDRAFT_200344 [ <i>Daphnia pulex</i> ]             | Protein metabolism | Ribosome biogenesis |
| N3958  | ribosomal protein S26 [ <i>Branchiostoma belcheri</i> ]                     | Protein metabolism | Ribosome biogenesis |
| N49552 | 40S ribosomal protein S9 [ <i>Plasmodium cynomolgi</i> strain B] >gi 3895   | Protein metabolism | Ribosome biogenesis |
| N5213  |                                                                             | Protein metabolism | Ribosome biogenesis |
| N5485  | ribosomal protein L10a [ <i>Fenneropenaeus merguensis</i> ]                 | Protein metabolism | Ribosome biogenesis |
| N59348 | hypothetical protein DAPPUDRAFT_194445 [ <i>Daphnia pulex</i> ]             | Protein metabolism | Ribosome biogenesis |
| N8980  | ribosomal protein S26 [ <i>Branchiostoma belcheri</i> ]                     | Protein metabolism | Ribosome biogenesis |

## Response to stress

|        |                                                                                 |                    |                              |
|--------|---------------------------------------------------------------------------------|--------------------|------------------------------|
| N25269 | Putative ferric-chelate reductase 1 [ <i>Crassostrea gigas</i> ]                | Response to stress | Defence response             |
| N42244 | Stathmin-4 [ <i>Acromyrmex echinatior</i> ]                                     | Response to stress | Defence response             |
| M12331 | 6-4 photolyase [ <i>Eurydice pulchra</i> ]                                      | Response to stress | DNA repair                   |
| M14489 | PREDICTED: EP300-interacting inhibitor of differentiation 3 [ <i>Ochoton</i>    | Response to stress | DNA repair                   |
| M292   | PREDICTED: similar to structural maintenance of chromosomes 5 smc               | Response to stress | DNA repair                   |
| N18190 | PREDICTED: DNA ligase 1-like [ <i>Aplysia californica</i> ]                     | Response to stress | DNA repair                   |
| N23030 | Fanconi anemia group J protein [ <i>Crassostrea gigas</i> ]                     | Response to stress | DNA repair                   |
| N27521 | hypothetical protein BRAFLDRAFT_91042 [ <i>Branchiostoma floridae</i> ] >       | Response to stress | DNA repair                   |
| N34045 | nth endonuclease III-like 1 [ <i>Xenopus (Silurana) tropicalis</i> ] >gi 892678 | Response to stress | DNA repair                   |
| M55716 | hypothetical protein TRIADDRAFT_20924 [ <i>Trichoplax adhaerens</i> ] >gi       | Response to stress | Other                        |
| M63378 | hypothetical protein SINV_02452 [ <i>Solenopsis invicta</i> ]                   | Response to stress | Other                        |
| N12841 | Protein tumorous imaginal discs, mitochondrial [ <i>Harpegnathos saltat</i>     | Response to stress | Other                        |
| N23481 | protease, serine, 15, isoform CRA_b [ <i>Mus musculus</i> ]                     | Response to stress | Other                        |
| N37789 | RE1-silencing transcription factor-like protein [ <i>Cricetulus griseus</i> ]   | Response to stress | Other                        |
| M2554  |                                                                                 | Response to stress | Response to oxidative stress |
| M56288 | conserved hypothetical protein [ <i>Pediculus humanus corporis</i> ] >gi 21     | Response to stress | Response to oxidative stress |
| N9090  | Chorion peroxidase [ <i>Camponotus floridanus</i> ]                             | Response to stress | Response to oxidative stress |

## Signal transduction

|         |                                                                               |                     |                                   |
|---------|-------------------------------------------------------------------------------|---------------------|-----------------------------------|
| N32208  | Sorting nexin-9, putative [ <i>Pediculus humanus corporis</i> ] >gi 2125058   | Signal transduction | Cell communication                |
| M3501   |                                                                               | Signal transduction | Cell-cell signaling               |
| N18727  | hypothetical protein DAPPUDRAFT_301948 [ <i>Daphnia pulex</i> ]               | Signal transduction | Cell-cell signaling               |
| M7219   | cAMP-dependent protein kinase catalytic subunit, putative [ <i>Pediculu</i>   | Signal transduction | Intracellular signal transduction |
| M77475  | PREDICTED: CDC42 binding protein kinase alpha-like [ <i>Saccoglossus kc</i>   | Signal transduction | Intracellular signal transduction |
| N18741  | PREDICTED: hypothetical protein LOC100678008 [ <i>Nasonia vitripenni</i>      | Signal transduction | Intracellular signal transduction |
| N30737  |                                                                               | Signal transduction | Intracellular signal transduction |
| N46242  | rassf1, putative [ <i>Ixodes scapularis</i> ] >gi 215500481 gb EEC09975.1     | Signal transduction | Intracellular signal transduction |
| N46504  | adenyl cyclase [ <i>Daphnia pulex</i> ]                                       | Signal transduction | Intracellular signal transduction |
| N55227  | hypothetical protein CAPTEDRAFT_92139 [ <i>Capitella teleta</i> ]             | Signal transduction | Intracellular signal transduction |
| N61603  | 1-phosphatidylinositol-4,5-bisphosphate phosphodiesterase gamma-              | Signal transduction | Intracellular signal transduction |
| M102893 | Sterile alpha and TIR motif-containing protein 1 [ <i>Harpegnathos saltat</i> | Signal transduction | Other                             |
| M105998 | RecName: Full=Guanine nucleotide-binding protein G(s) subunit alph            | Signal transduction | Other                             |
| M107218 | hypothetical protein DAPPUDRAFT_305606 [ <i>Daphnia pulex</i> ]               | Signal transduction | Other                             |
| M10861  |                                                                               | Signal transduction | Other                             |
| M11904  | PREDICTED: LOW QUALITY PROTEIN: TBC1 domain family member Cc                  | Signal transduction | Other                             |
| M14542  | cAMP-dependent protein kinase catalytic subunit, putative [ <i>Pediculu</i>   | Signal transduction | Other                             |
| M16163  | hypothetical protein TcasGA2_TC003754 [ <i>Tribolium castaneum</i> ]          | Signal transduction | Other                             |
| M16660  | pigment-dispersing hormone 3 [ <i>Marsupenaeus japonicus</i> ]                | Signal transduction | Other                             |
| M1890   | opsin protein [ <i>Charybdis japonica</i> ]                                   | Signal transduction | Other                             |
| M2512   | PREDICTED: similar to arf gtpase-activating protein [ <i>Tribolium castan</i> | Signal transduction | Other                             |
| M2592   | PREDICTED: guanine nucleotide exchange factor MSS4 homolog [ <i>Nas</i>       | Signal transduction | Other                             |
| M5422   | arrestin [ <i>Libelloides macaronius</i> ]                                    | Signal transduction | Other                             |
| M63073  | class B secretin-like G-protein coupled receptor GPRmth6, putative [ <i>I</i> | Signal transduction | Other                             |
| M67442  |                                                                               | Signal transduction | Other                             |
| M70093  | hypothetical protein DAPPUDRAFT_3691 [ <i>Daphnia pulex</i> ]                 | Signal transduction | Other                             |
| M71476  | hypothetical protein DAPPUDRAFT_49564 [ <i>Daphnia pulex</i> ]                | Signal transduction | Other                             |
| M72019  | ADP-ribosylation factor [ <i>Marsupenaeus japonicus</i> ]                     | Signal transduction | Other                             |

| ID     | Annotation                                                           | GO term             | Go child term |
|--------|----------------------------------------------------------------------|---------------------|---------------|
| M76077 | G-protein coupled receptor, putative [Ixodes scapularis] >gi 215508: | Signal transduction | Other         |
| M7611  | hypothetical protein DAPPUDRAFT_226671 [Daphnia pulex]               | Signal transduction | Other         |
| M82714 | PREDICTED: similar to Rapgap1 CG34374-PF [Tribolium castaneum]       | Signal transduction | Other         |
| M83708 | hypothetical protein DAPPUDRAFT_241093 [Daphnia pulex]               | Signal transduction | Other         |
| M85776 | signal transducer and activator of transcription [Fenneropenaeus chi | Signal transduction | Other         |
| M91288 | PREDICTED: hypothetical protein LOC410161 [Apis mellifera]           | Signal transduction | Other         |
| M93343 | PREDICTED: apoptosis regulatory protein Siva isoform X2 [Mesocrice   | Signal transduction | Other         |
| M99783 | putative TGF-beta receptor type I baboon protein [Daphnia pulex]     | Signal transduction | Other         |
| N12871 | pdz domain containing guanine nucleotide exchange factor, pdz-gef,   | Signal transduction | Other         |
| N16121 | hypothetical protein DAPPUDRAFT_306990 [Daphnia pulex]               | Signal transduction | Other         |
| N18224 | hypothetical protein DAPPUDRAFT_318992 [Daphnia pulex]               | Signal transduction | Other         |
| N18394 |                                                                      | Signal transduction | Other         |
| N18775 | PREDICTED: Otolemur garnettii protein phosphatase 2, regulatory su   | Signal transduction | Other         |
| N19969 | RecName: Full=Arrestin homolog >gi 298756 gb AAB25860.1  arre:       | Signal transduction | Other         |
| N25485 |                                                                      | Signal transduction | Other         |
| N28816 | signal transducer and activator of transcription [Penaeus monodon]   | Signal transduction | Other         |
| N29517 | IMD [Litopenaeus vannamei]                                           | Signal transduction | Other         |
| N30241 |                                                                      | Signal transduction | Other         |
| N30319 | signal transducer and activator of transcription [Fenneropenaeus chi | Signal transduction | Other         |
| N31246 | integral membrane protein GPR177-B, putative [Ixodes scapularis] >ξ  | Signal transduction | Other         |
| N38380 | conserved hypothetical protein [Pediculus humanus corporis] >gi 21   | Signal transduction | Other         |
| N39786 | GTP binding protein alpha subunit Gi [Marsupenaeus japonicus]        | Signal transduction | Other         |
| N39836 |                                                                      | Signal transduction | Other         |
| N43758 | hypothetical protein DAPPUDRAFT_194337 [Daphnia pulex]               | Signal transduction | Other         |
| N46541 | pigment-dispersing hormone 3 [Marsupenaeus japonicus]                | Signal transduction | Other         |
| N58827 | ankyrin repeat containing protein [Ixodes scapularis] >gi 215498928  | Signal transduction | Other         |
| N61953 | smad4 [Culex quinquefasciatus] >gi 167873062 gb EDS36445.1  sr       | Signal transduction | Other         |
| N7824  | PREDICTED: poly(U)-specific endoribonuclease-like isoform 1 [Strong  | Signal transduction | Other         |

## Transport

|         |                                                                       |           |                         |
|---------|-----------------------------------------------------------------------|-----------|-------------------------|
| N56030  | sugar transporter, putative [Ixodes scapularis] >gi 215499141 gb EE   | Transport | Carbohydrate transport  |
| M3400   | hypothetical protein DAPPUDRAFT_304059 [Daphnia pulex]                | Transport | Intracellular transport |
| M61     |                                                                       | Transport | Intracellular transport |
| E6444   | voltage-dependent non-L-type calcium channel alpha-1 subunit, part    | Transport | Ion transport           |
| M107683 | Euphausia superba mitochondrion, partial genome                       | Transport | Ion transport           |
| M11238  | PREDICTED: Y+L amino acid transporter 2-like isoform 2 [Acyrtosiph    | Transport | Ion transport           |
| M112642 | hypothetical protein DAPPUDRAFT_311768 [Daphnia pulex]                | Transport | Ion transport           |
| M15170  | PREDICTED: solute carrier family 22 member 8-like [Ornithorhynchus    | Transport | Ion transport           |
| M15519  | hypothetical protein CAPTEDRAFT_167536 [Capitella teleta]             | Transport | Ion transport           |
| M36129  | Na <sup>+</sup> /K <sup>+</sup> ATPase [Penaeus monodon]              | Transport | Ion transport           |
| M57456  | hypothetical protein DAPPUDRAFT_226732 [Daphnia pulex]                | Transport | Ion transport           |
| M57704  | hypothetical protein BRAFLDRAFT_96574 [Branchiostoma floridae] >      | Transport | Ion transport           |
| M60197  | Euphausia superba voucher 841M mitochondrion, partial genome          | Transport | Ion transport           |
| M62922  | PREDICTED: calcium-transporting ATPase type 2C member 1-like isof     | Transport | Ion transport           |
| M6504   | putative TRP channel protein [Periplaneta americana]                  | Transport | Ion transport           |
| M65887  | conserved hypothetical protein [Pediculus humanus corporis] >gi 21    | Transport | Ion transport           |
| M6590   | PREDICTED: ileal sodium/bile acid cotransporter-like isoform 1 [Naso  | Transport | Ion transport           |
| M66117  | pacifastin heavy chain precursor [Pacifastacus leniusculus]           | Transport | Ion transport           |
| M68318  | voltage-gated calcium channel beta subunit transcript variant 6 [Scyl | Transport | Ion transport           |
| M70932  | SERCA [Panulirus argus] >gi 71534700 emb CAH10336.1  SERCA Ca         | Transport | Ion transport           |
| M74272  | plasma membrane calcium ATPase [Callinectes sapidus]                  | Transport | Ion transport           |
| M84429  | hypothetical protein DAPPUDRAFT_302359 [Daphnia pulex]                | Transport | Ion transport           |
| M85975  | hypothetical protein TRIADDRAFT_21514 [Trichoplax adhaerens] >gi      | Transport | Ion transport           |
| M9215   | Euphausia superba voucher 841M mitochondrion, partial genome          | Transport | Ion transport           |
| N12109  | sodium potassium-transporting ATPase subunit beta [Litopenaeus va     | Transport | Ion transport           |
| N14105  | Candida tropicalis MYA-3404 NADH-ubiquinone oxidoreductase 20 k       | Transport | Ion transport           |
| N15196  | hypothetical protein DAPPUDRAFT_324399 [Daphnia pulex]                | Transport | Ion transport           |
| N15639  | pacifastin heavy chain [Macrobrachium rosenbergii]                    | Transport | Ion transport           |
| N16505  | PREDICTED: zinc transporter ZIP10-like [Aplysia californica]          | Transport | Ion transport           |
| N21410  | PREDICTED: glycine receptor, alpha 2-like [Saccoglossus kowalevskii]  | Transport | Ion transport           |
| N23100  | Mitochondrial sodium/hydrogen exchanger NHA2 [Crassostrea gigas       | Transport | Ion transport           |
| N24758  | chloride channel, putative [Ixodes scapularis] >gi 215490978 gb EE    | Transport | Ion transport           |
| N29112  | hypothetical protein DAPPUDRAFT_60952 [Daphnia pulex]                 | Transport | Ion transport           |
| N31065  | hypothetical protein DAPPUDRAFT_40908 [Daphnia pulex]                 | Transport | Ion transport           |

| ID      | Annotation                                                                             | GO term   | Go child term              |
|---------|----------------------------------------------------------------------------------------|-----------|----------------------------|
| N32924  | hypothetical protein DAPPUDRAFT_300887 [Daphnia pulex]                                 | Transport | Ion transport              |
| N33931  | GD22775 [Drosophila simulans] >gi 194190001 gb EDX03577.1                              | Transport | Ion transport              |
| N48362  |                                                                                        | Transport | Ion transport              |
| N49258  | pacifastin heavy chain precursor [Pacifastacus leniusculus]                            | Transport | Ion transport              |
| M17476  |                                                                                        | Transport | Lipid transport            |
| M2931   | clottable protein [Marsupenaeus japonicus]                                             | Transport | Lipid transport            |
| N22878  | PREDICTED: peroxisomal membrane protein PMP34-like [Apis mellifera]                    | Transport | Mitochondrial transport    |
| N21981  | Sodium-dependent neutral amino acid transporter B(0) [Harpegnathos saltator]           | Transport | Neurotransmitter transport |
| M21773  | fatty acids binding protein [Fenneropenaeus chinensis]                                 | Transport | Other                      |
| M4132   | hypothetical protein CAPTEDRAFT_179128 [Capitella teleta]                              | Transport | Other                      |
| M4409   | hypothetical protein TcasGA2_TC003455 [Tribolium castaneum]                            | Transport | Other                      |
| M46058  | hemocyanin subunit L [Marsupenaeus japonicus]                                          | Transport | Other                      |
| M50848  | hemocyanin 2 [Pacifastacus leniusculus]                                                | Transport | Other                      |
| M59949  | large neutral amino acids transporter, putative [Pediculus humanus corporis]           | Transport | Other                      |
| M60934  |                                                                                        | Transport | Other                      |
| M89627  | organic anion transporting polypeptide 33Ea, isoform A [Drosophila melanogaster]       | Transport | Other                      |
| N18393  |                                                                                        | Transport | Other                      |
| N41524  | hypothetical protein CAPTEDRAFT_222010 [Capitella teleta]                              | Transport | Other                      |
| M102512 | hypothetical protein CAPTEDRAFT_3285 [Capitella teleta]                                | Transport | Protein transport          |
| M1161   |                                                                                        | Transport | Protein transport          |
| M159    |                                                                                        | Transport | Protein transport          |
| M2270   | PREDICTED: conserved oligomeric Golgi complex subunit 2 isoform X1                     | Transport | Protein transport          |
| M3324   | hypothetical protein DAPPUDRAFT_65881 [Daphnia pulex]                                  | Transport | Protein transport          |
| M48794  | PREDICTED: mitochondrial import inner membrane translocase subunit OXA1L               | Transport | Protein transport          |
| M58603  | AP-2 complex subunit alpha [Camponotus floridanus]                                     | Transport | Protein transport          |
| M607    | Charged multivesicular body protein 2b [Crassostrea gigas]                             | Transport | Protein transport          |
| M61140  | PREDICTED: ras-like GTP-binding protein Rho1 [Nasonia vitripennis]                     | Transport | Protein transport          |
| M67600  | hypothetical protein D910_04042 [Dendroctonus ponderosae]                              | Transport | Protein transport          |
| M9638   | hypothetical protein DAPPUDRAFT_212220 [Daphnia pulex]                                 | Transport | Protein transport          |
| N12003  | hypothetical protein CAPTEDRAFT_223046 [Capitella teleta]                              | Transport | Protein transport          |
| N13033  | hypothetical protein DAPPUDRAFT_304899 [Daphnia pulex]                                 | Transport | Protein transport          |
| N15972  | unknown [Dendroctonus ponderosae] >gi 546684934 gb ERL94516                            | Transport | Protein transport          |
| N18371  | PREDICTED: Nasonia vitripennis hypothetical protein LOC100121637                       | Transport | Protein transport          |
| N23304  | PREDICTED: AP-4 complex subunit sigma-1 isoform X1 [Ficedula albicollis]               | Transport | Protein transport          |
| N24480  |                                                                                        | Transport | Protein transport          |
| N33152  | conserved hypothetical protein [Pediculus humanus corporis] >gi 211111                 | Transport | Protein transport          |
| N37900  | cation-dependent mannose-6-phosphate receptor, partial [Marsupenaeus japonicus]        | Transport | Protein transport          |
| N39514  | hypothetical protein DAPPUDRAFT_318231 [Daphnia pulex]                                 | Transport | Protein transport          |
| N42390  | PREDICTED: transportin-1 [Nasonia vitripennis]                                         | Transport | Protein transport          |
| M104151 | hypothetical protein DAPPUDRAFT_301164 [Daphnia pulex]                                 | Transport | Transmembrane transport    |
| M2047   | PREDICTED: similar to AGAP009835-PA [Tribolium castaneum]                              | Transport | Transmembrane transport    |
| M4144   | monocarboxylate transporter, putative [Ixodes scapularis] >gi 21550                    | Transport | Transmembrane transport    |
| M64131  | conserved hypothetical protein [Pediculus humanus corporis] >gi 211111                 | Transport | Transmembrane transport    |
| M8613   | peroxisomal membrane protein, putative [Ixodes scapularis] >gi 21550                   | Transport | Transmembrane transport    |
| M93004  | organic cation transporter, putative [Pediculus humanus corporis] >g                   | Transport | Transmembrane transport    |
| M99996  | PREDICTED: multidrug resistance-associated protein 1 isoform X4 [Arabidopsis thaliana] | Transport | Transmembrane transport    |
| N10258  |                                                                                        | Transport | Transmembrane transport    |
| N19252  | PREDICTED: similar to AGAP007340-PB [Tribolium castaneum]                              | Transport | Transmembrane transport    |
| N22300  | GK22112 [Drosophila willistoni] >gi 300681124 sp B4MYA4.1 TRET                         | Transport | Transmembrane transport    |
| N40391  | hypothetical protein DAPPUDRAFT_312099 [Daphnia pulex]                                 | Transport | Transmembrane transport    |
| M13163  | PREDICTED: vesicle transport protein SFT2A [Chrysemys picta bellii]                    | Transport | Vesicle-mediated transport |
| M651    | hypothetical protein CB1_000300004 [Camelus ferus]                                     | Transport | Vesicle-mediated transport |
| N38975  | PREDICTED: ralBP1-associated Eps domain-containing protein 1 isoform X1                | Transport | Vesicle-mediated transport |
