# Supplementary material for: Analysis of the circadian transcriptome of the Antarctic krill Euphausia superba
Source: Sci Rep. 2019 Sep 25;9:13894. doi: 10.1038/s41598-019-50282-1 (PMC6761102; doi:10.1038/s41598-019-50282-1)
Supplement: Supplementary file 2 — Supplementary Table 1 [file 41598_2019_50282_MOESM2_ESM.pdf]

## **Analysis of the circadian transcriptome of the Antarctic krill *Euphausia superba***

Alberto Biscontin<sup>1,2,\*</sup>, Paolo Martini<sup>1</sup>, Rodolfo Costa<sup>1</sup>, Achim Kramer<sup>2</sup>, Bettina Meyer<sup>3,4,5</sup>, So Kawaguchi<sup>6</sup>, Mathias Teschke<sup>3</sup>, Cristiano De Pittà<sup>1,\*</sup>

<sup>1</sup>Dipartimento di Biologia, Università degli Studi di Padova, Padova, Italy

<sup>2</sup>Laboratory of Chronobiology, Charité Universitätsmedizin Berlin, Berlin, Germany

<sup>3</sup>Section Polar Biological Oceanography, Alfred Wegener Institute Helmholtz Centre for Polar and Marine Research, Bremerhaven, Germany

<sup>4</sup>Institute for Chemistry and Biology of the Marine Environment, Carl von Ossietzky University of Oldenburg, Oldenburg, Germany

<sup>5</sup>Helmholtz Institute for Functional Marine Biodiversity (HIFMB) at the University of Oldenburg, 26111 Oldenburg, Germany

<sup>6</sup>Department of Environment and Heritage, Australian Antarctic Division, Kingston, Tasmania, Australia

\*Corresponding authors:

Cristiano De Pittà, Dipartimento di Biologia, Università degli Studi di Padova, via U. Bassi 58/B 35131 Padova, Italy; Phone: +39-049-8276210; Fax: +39-049-8276209; e-mail address: cristiano.depitta@unipd.it

Alberto Biscontin, Dipartimento di Biologia, Università degli Studi di Padova, via U. Bassi 58/B 35131 Padova, Italy; Phone: +39-049-8276228; Fax: +39-049-8276209; e-mail address: alberto.biscontin@unipd.it



| Probe ID              | Accession | GO term     | GO category | E-value | 0          | 1        | 2                     | 3        | 4        | 5        | 6        | 7        | 8        | 9        | 10       | 11       | 12       | 13       | 14       | 15       | 16       | 17       | 18       | 19       | 20       | 21       | 22       | 23       | 24       | 25       |          |          |
|-----------------------|-----------|-------------|-------------|---------|------------|----------|-----------------------|----------|----------|----------|----------|----------|----------|----------|----------|----------|----------|----------|----------|----------|----------|----------|----------|----------|----------|----------|----------|----------|----------|----------|----------|----------|
| CUST_11597.P420100886 | N27243    | 1.33117e-05 | 18          | 9       | 11.97441   | 13.14554 | 853.88184             | 15.48991 | 14.73999 | 19.43327 | 22.53853 | 42.25942 | 44.83771 | 25.42345 | 46.04292 | 58.8605  | 13.40443 | 13.91427 | 54.67639 | 39.48899 | 11.37669 | 37.98691 | 9.76311  | 8.247584 | 12.90521 | 30.18612 | 17.7781  | 9.406343 | 55.39639 | 43.88384 | 24.93287 |          |
| CUST_38504.P420100886 | N27253    | 1.35472e-05 | 15          | 9       | 48.2941    | 602.7354 | 881.3099              | 459.4079 | 47.10399 | 27.6504  | 66.6817  | 507.3489 | 53.8848  | 755.8283 | 58.5806  | 70.49081 | 62.71967 | 57.6631  | 68.4183  | 618.517  | 54.6468  | 376.0084 | 388.284  | 358.284  | 358.284  | 358.284  | 358.284  | 358.284  | 358.284  | 358.284  | 358.284  |          |
| CUST_31297.P420100886 | N27254    | 1.105003    | 12          | 9       | 110.8939   | 123.675  | 139.919               | 111.404  | 105.9717 | 109.3517 | 105.317  | 149.1919 | 149.1919 | 149.1919 | 149.1919 | 149.1919 | 149.1919 | 149.1919 | 149.1919 | 149.1919 | 149.1919 | 149.1919 | 149.1919 | 149.1919 | 149.1919 | 149.1919 | 149.1919 | 149.1919 | 149.1919 | 149.1919 |          |          |
| CUST_11325.P420100886 | N27624    | 1.40359e-04 | 24          | 21      | 3071.90239 | 878.P02  | domain-containing pro |          |          |          |          |          |          |          |          |          |          |          |          |          |          |          |          |          |          |          |          |          |          |          |          |          |
| CUST_44183.P420100886 | M56195    | 1.44053e-03 | 24          | 21      | 267.5084   | 338.4518 | 380.602               | 318.4002 | 252.9881 | 219.8411 | 171.5328 | 281.0852 | 268.9804 | 314.7154 | 299.2328 | 312.125  | 660.448  | 292.5506 | 410.9317 | 296.7468 | 484.4076 | 312.1009 | 493.7328 | 415.8814 | 484.7799 | 600.448  | 374.5361 | 126.1261 | 190.7029 | 121.3825 | 171.7541 |          |
| CUST_2564.P420100886  | N16239    | 1.45756e-04 | 24          | 21      | 75.12194   | 101.7856 | 134.9328              | 67.18486 | 88.1474  | 102.6741 | 102.6741 | 94.98744 | 102.6741 | 87.17685 | 96.80429 | 100.9966 | 90.56235 | 123.5981 | 101.3719 | 109.6093 | 103.7123 | 163.488  | 257.6419 | 229.0236 | 135.397  | 98.439   | 136.2198 | 103.4042 | 92.52323 | 103.8607 | 94.05438 | 92.91545 |
| CUST_41715.P420100886 | M58374    | 1.46017e-05 | 24          | 15      | 66.086     | 50.45124 | 24.97563              | 54.7847  | 73.6851  | 27.6783  | 38.4008  | 67.4873  | 55.69754 | 67.87655 | 67.12951 | 32.5296  | 80.84339 | 39.16473 | 17.39308 | 128.2695 | 68.24011 | 161.8663 | 93.9655  | 46.9241  | 65.8217  | 50.405   | 45.58935 | 103.8653 | 95.92147 | 51.7829  | 27.03026 |          |
| CUST_27765.P420100886 | N65656    | 1.53454e-05 | 24          | 9       | 75.00481   | 61.10664 | 63.48829              | 95.31396 | 46.65167 | 49.33322 | 48.9327  | 68.0037  | 56.8004  | 71.3006  | 91.7543  | 122.0663 | 115.7269 | 138.3674 | 74.24154 | 55.49077 | 31.81107 | 40.28969 | 48.83197 | 39.60825 | 39.76397 | 103.401  | 143.9564 | 194.288  | 168.688  | 116.0647 | 96.26283 |          |
| CUST_33800.P420100886 | N65656    | 1.53454e-05 | 24          | 9       | 243.5905   | 314.9328 | 245.5754              | 216.205  | 121.5696 | 216.205  | 121.5696 | 216.205  | 121.5696 | 216.205  | 121.5696 | 216.205  | 121.5696 | 216.205  | 121.5696 | 216.205  | 121.5696 | 216.205  | 121.5696 | 216.205  | 121.5696 | 216.205  | 121.5696 | 216.205  | 121.5696 | 216.205  | 121.5696 |          |
| CUST_4602.P420100886  | N17124    | 1.61088e-05 | 24          | 15      | 596.3161   | 683.677  | 683.677               | 683.677  | 683.677  | 683.677  | 683.677  | 683.677  | 683.677  | 683.677  | 683.677  | 683.677  | 683.677  | 683.677  | 683.677  | 683.677  | 683.677  | 683.677  | 683.677  | 683.677  | 683.677  | 683.677  | 683.677  | 683.677  | 683.677  | 683.677  | 683.677  |          |
| CUST_38574.P420100886 | M28143    | 1.6317      |             |         |            |          |                       |          |          |          |          |          |          |          |          |          |          |          |          |          |          |          |          |          |          |          |          |          |          |          |          |          |





















[illegible]

| Probe ID                                   | ID | p-value | Period                                     | Phase | GO category | GO term                                    | E-value    | 0        | 0        | 0        | 3        | 3        | 6        | 6        | 9        | 9        | 12       | 12       | 15       | 15       | 18       | 18       | 21       | 21       | 24       | 24       |          |          |          |          |          |          |          |          |
|--------------------------------------------|----|---------|--------------------------------------------|-------|-------------|--------------------------------------------|------------|----------|----------|----------|----------|----------|----------|----------|----------|----------|----------|----------|----------|----------|----------|----------|----------|----------|----------|----------|----------|----------|----------|----------|----------|----------|----------|----------|
| 121484199 cuticle protein CUT6 [Portunus p | 18 | 3       | 121484199 cuticle protein CUT6 [Portunus p | 18    | 3           | 121484199 cuticle protein CUT6 [Portunus p | 0.00000213 | 6018.305 | 175.995  | 7568.31  | 9923.97  | 11805.59 | 10764.25 | 316.0187 | 1050.844 | 1010     | 4783.413 | 16874.05 | 7058.228 | 5039.165 | 6988.188 | 6612.476 | 95.9971  | 177.2739 | 84.16166 | 1567.333 | 1334.416 | 1531.626 | 8189.629 | 8484.924 | 8348.895 | 1579.509 | 5277.675 | 4650.164 |
| 1214614 P429010886 N31374                  | 15 | 0       | 0.00140048                                 | 15    | 0           | 0.00140048                                 | 1.66E-47   | 172.349  | 181.7225 | 163.0243 | 140.6545 | 151.8995 | 138.0005 | 120.4935 | 113.8607 | 154.2824 | 122.5728 | 131.766  | 103.1963 | 171.3748 | 112.9955 | 149.381  | 134.9488 | 167.0939 | 200.7335 | 157.7896 | 164.1609 | 167.0102 | 82.9737  | 63.94196 | 86.7019  | 145.0834 | 157.1719 | 127.0142 |
| 1214614 P429010886 N31374                  | 15 | 0       | 0.00140048                                 | 15    | 0           | 0.00140048                                 | 1.66E-47   | 172.349  | 181.7225 | 163.0243 | 140.6545 | 151.8995 | 138.0005 | 120.4935 | 113.8607 | 154.2824 | 122.5728 | 131.766  | 103.1963 | 171.3748 | 112.9955 | 149.381  | 134.9488 | 167.0939 | 200.7335 | 157.7896 | 164.1609 | 167.0102 | 82.9737  | 63.94196 | 86.7019  | 145.0834 | 157.1719 | 127.0142 |
| 1214614 P429010886 N31374                  | 15 | 0       | 0.00140048                                 | 15    | 0           | 0.00140048                                 | 1.66E-47   | 172.349  | 181.7225 | 163.0243 | 140.6545 | 151.8995 | 138.0005 | 120.4935 | 113.8607 | 154.2824 | 122.5728 | 131.766  | 103.1963 | 171.3748 | 112.9955 | 149.381  | 134.9488 | 167.0939 | 200.7335 | 157.7896 | 164.1609 | 167.0102 | 82.9737  | 63.94196 | 86.7019  | 145.0834 | 157.1719 | 127.0142 |
| 1214614 P429010886 N31374                  | 15 | 0       | 0.00140048                                 | 15    | 0           | 0.00140048                                 | 1.66E-47   | 172.349  | 181.7225 | 163.0243 | 140.6545 | 151.8995 | 138.0005 | 120.4935 | 113.8607 | 154.2824 | 122.5728 | 131.766  | 103.1963 | 171.3748 | 112.9955 | 149.381  | 134.9488 | 167.0939 | 200.7335 | 157.7896 | 164.1609 | 167.0102 | 82.9737  | 63.94196 | 86.7019  | 145.0834 | 157.1719 | 127.0142 |
| 1214614 P429010886 N31374                  | 15 | 0       | 0.00140048                                 | 15    | 0           | 0.00140048                                 | 1.66E-47   | 172.349  | 181.7225 | 163.0243 | 140.6545 | 151.8995 | 138.0005 | 120.4935 | 113.8607 | 154.2824 | 122.5728 | 131.766  | 103.1963 | 171.3748 | 112.9955 | 149.381  | 134.9488 | 167.0939 | 200.7335 | 157.7896 | 164.1609 | 167.0102 | 82.9737  | 63.94196 | 86.7019  | 145.0834 | 157.1719 | 127.0142 |
| 1214614 P429010886 N31374                  | 15 | 0       | 0.00140048                                 | 15    | 0           | 0.00140048                                 | 1.66E-47   | 172.349  | 181.7225 | 163.0243 | 140.6545 | 151.8995 | 138.0005 | 120.4935 | 113.8607 | 154.2824 | 122.5728 | 131.766  | 103.1963 | 171.3748 | 112.9955 | 149.381  | 134.9488 | 167.0939 | 200.7335 | 157.7896 | 164.1609 | 167.0102 | 82.9737  | 63.94196 | 86.7019  | 145.0834 | 157.1719 | 127.0142 |
| 1214614 P429010886 N31374                  | 15 | 0       | 0.00140048                                 | 15    | 0           | 0.00140048                                 | 1.66E-47   | 172.349  | 181.7225 | 163.0243 | 140.6545 | 151.8995 | 138.0005 | 120.4935 | 113.8607 | 154.2824 | 122.5728 | 131.766  | 103.1963 | 171.3748 | 112.9955 | 149.381  | 134.9488 | 167.0939 | 200.7335 | 157.7896 | 164.1609 | 167.0102 | 82.9737  | 63.94196 | 86.7019  | 145.0834 | 157.1719 | 127.0142 |
| 1214614 P429010886 N31374                  | 15 | 0       | 0.00140048                                 | 15    | 0           | 0.00140048                                 | 1.66E-47   | 172.349  | 181.7225 | 163.0243 | 140.6545 | 151.8995 | 138.0005 | 120.4935 | 113.8607 | 154.2824 | 122.5728 | 131.766  | 103.1963 | 171.3748 | 112.9955 | 149.381  | 134.9488 | 167.0939 | 200.7335 |          |          |          |          |          |          |          |          |          |





























[illegible]



[illegible]































| Probe ID              | ID     | p-value     | Period | Phase | EBI ID     | Annotation                     | GO category | Go term  | E-value  | 1        | 2        | 3        | 4        | 5        | 6         | 7        | 8        | 9        | 10       | 11       | 12        | 13       | 14       | 15       | 16       | 17       | 18       | 19       | 20       | 21       | 22       | 23       | 24       |          |          |          |
|-----------------------|--------|-------------|--------|-------|------------|--------------------------------|-------------|----------|----------|----------|----------|----------|----------|----------|-----------|----------|----------|----------|----------|----------|-----------|----------|----------|----------|----------|----------|----------|----------|----------|----------|----------|----------|----------|----------|----------|----------|
| CUST_25149_P429010886 | N45481 | 0.01554697  | 24     | 1     | 800029613  | PREDICTED: uncharacterized prc |             |          | 2.95e-11 | 83.78528 | 75.00197 | 71.21793 | 69.264   | 61.60004 | 48.38472  | 110.1907 | 82.7895  | 96.17648 | 125.4485 | 58.445   | 92.30682  | 122.5288 | 65.5546  | 90.85891 | 142.9154 | 85.25564 | 154.8276 | 119.1723 | 78.67787 | 123.7963 | 117.9412 | 88.9446  | 110.9089 | 140.7536 | 88.29653 | 131.752  |
| CUST_25149_P429010886 | N50543 | 0.01557609  | 15     | 3     | 32.59654   | 16.5815                        | 16.2367     | 21.62961 | 18.5866  | 23.9329  | 17.63971 | 25.3627  | 15.56376 | 17.76818 | 16.365294 | 17.87345 | 15.07604 | 17.47131 | 28.92088 | 16.56329 | 17.38549  | 15.84508 | 20.75367 | 21.60821 | 16.16135 | 75.7504  | 16.88449 | 13.9951  | 13.74367 | 11.88421 |          |          |          |          |          |          |
| CUST_52946_P429010886 | M95975 | 0.015611685 | 24     | 1     | 52.8068    | 89.71365                       | 71.3958     | 58.47266 | 75.06882 | 79.24842 | 81.70126 | 82.94083 | 70.14108 | 69.34161 | 79.73637  | 71.72638 | 69.45301 | 84.75003 | 70.37365 | 71.67182 | 88.02924  | 94.53661 | 89.14608 | 80.12221 | 83.76589 | 91.65455 | 78.86465 | 73.7524  | 112.4597 | 77.6985  | 85.21665 | 98.6875  |          |          |          |          |
| CUST_11526_P429010886 | N82147 | 0.015661221 | 18     | 1     | 51.57578   | 83.74447                       | 68.2334     | 56.84171 | 52.6235  | 66.97909 | 64.47129 | 59.59048 | 63.03163 | 62.59048 | 63.88402  | 64.13391 | 70.45326 | 60.64051 | 60.28993 | 53.14759 | 59.99691  | 59.26007 | 60.28993 | 53.14759 | 59.99691 | 59.26007 | 60.28993 | 53.14759 | 59.99691 | 59.26007 | 60.28993 | 53.14759 | 59.99691 |          |          |          |
| CUST_85156_P429010886 | N23158 | 0.015652637 | 21     | 9     | 39.321     | 36.97455                       | 42.56107    | 36.03697 | 27.5289  | 34.145   | 45.88546 | 28.85271 | 50.78318 | 40.16764 | 38.8745   | 55.09974 | 64.28341 | 33.96025 | 47.10201 | 79.96953 | 37.53429  | 62.91855 | 40.75864 | 29.8241  | 40.38567 | 43.38408 | 48.0622  | 47.79385 | 29.6741  | 34.63148 | 40.18248 |          |          |          |          |          |
| CUST_16964_P429010886 | N37149 | 0.015632637 | 24     | 1     | 21.42365   | 53.72874                       | 20.30731    | 20.6762  | 16.75504 | 17.60177 | 45.30575 | 44.88574 | 55.95718 | 29.72829 | 32.91719  | 18.67564 | 43.38402 | 39.42527 | 41.91231 | 76.94953 | 58.42497  | 51.19908 | 30.63765 | 23.6105  | 25.9458  | 28.37038 | 38.2962  | 23.50843 | 34.9615  | 20.9828  | 23.8075  |          |          |          |          |          |
| CUST_29715_P429010886 | N60399 | 0.015646128 | 24     | 1     | 51.214949  | PREDICTED: gastrula znc finger |             |          | 7.51e-13 | 8.871249 | 1.863753 | 5.79468  | 3.950402 | NA       | 5.594771  | 4.541722 | 4.63734  | 5.04812  | 5.64044  | 4.512451 | 5.7056694 | NA       | 5.817944 | 11.6785  | 6.359637 | 6.903299 | 6.638657 | 10.4547  | 9.76161  | 9.94778  | 7.85808  | 7.531208 | 10.3864  | 9.016507 | 5.81493  |          |
| CUST_22976_P429010886 | N11955 | 0.015655185 | 18     | 6     | 32.1454784 | hypothetical protein DAPPIURA  | Transport   |          | 1.45e-13 | 4.877747 | 20.00074 | 13.3842  | 20.00074 | 25.07216 | 18.7418   | NA       | 22.42506 | 21.618   | 21.55928 | 20.08349 | 21.646    | 19.65958 | 15.26868 | 20.228   | 72.7728  | 23.60789 | 8.694186 | 4.64216  | 6.20088  | 16.10452 | 17.7868  | 17.7838  | 15.2125  | 9.39677  | 31.14654 | 40.30381 |
| CUST_3680_P429010886  | N15033 | 0.015656732 | 24     | 1     | 8.27e-20   | 33.0209                        | 61.25239    | 36.48616 | 39.59959 | 59.58172 | 62.82209 | 33.15557 | 57.21256 | 39.19171 | 38.12534  | 60.10487 | 36.19633 | 66.74201 | 65.04496 | 45.32827 | 49.27688  | 56.07467 | 43.89958 | 48.59053 | 62.84822 | 39.55568 | 39.83452 | 56.69444 | 34.23416 | 47.33022 | 42.6882  |          |          |          |          |          |
| CUST_11526_P429010886 | N82147 | 0.015661221 | 18     | 1     | 51.57578   | 83.74447                       | 68.2334     | 56.84171 | 52.6235  | 66.97909 | 64.47129 | 59.59048 | 63.03163 | 62.59048 | 63.88402  | 64.13391 | 70.45326 | 60.64051 | 60.28993 | 53.14759 | 59.99691  | 59.26007 | 60.28993 | 53.14759 | 59.99691 | 59.26007 | 60.28993 | 53.14759 | 59.99691 | 59.26007 | 60.28993 | 53.14759 | 59.99691 |          |          |          |
| CUST_3999_P429010886  | N40603 | 0.015662518 | 21     | 0     | 352.0796   | 151.2854                       | 420.3019    | 339.5795 | 136.8929 | 280.8728 | 154.8544 | 144.2441 | 191.9315 | 147.7855 | 154.10781 | 141.8167 | 210.1179 | 114.8551 | 138.5185 | 185.6007 | 226.2505  | 218.2408 | 298.292  | 63.413   | 288.992  | 63.413   | 288.992  | 63.413   | 288.992  | 63.413   | 288.992  | 63.413   | 288.992  |          |          |          |
| CUST_15035_P429010886 | N33900 | 0.015663401 | 12     | 0     | 608.8174   | 968.7419                       | 794.9446    | 722.325  | 610.5014 | 527.7599 | 321.2836 | 535.2394 | 592.215  | 604.6962 | 814.573   | 604.6962 | 814.573  | 604.6962 | 814.573  | 604.6962 | 814.573   | 604.6962 | 814.573  | 604.6962 | 814.573  | 604.6962 | 814.573  | 604.6962 | 814.573  | 604.6962 | 814.573  | 604.6962 | 814.573  | 604.6962 |          |          |
| CUST_45627_P429010886 | M69717 | 0.015669558 | 24     | 3     | 170.625    | 150.2816                       | 214.9733    | 202.369  | 166.6648 | 41.1376  | 110.0775 | 251.1346 | 181.7766 | 90.0083  | 43.4692   | 268.6423 | 185.4176 | 317.1285 | 181.7766 | 90.0083  | 43.4692   | 268.6423 | 185.4176 | 317.1285 | 181.7766 | 90.0083  | 43.4692  | 268.6423 | 185.4176 | 317.1285 | 181.7766 | 90.0083  | 43.4692  | 268.6423 |          |          |
| CUST_43382_P429010886 | M81549 | 0.015669558 | 24     | 18    | 664.2351   | 751.8458                       | 870.8728    | 620.4956 | 545.9466 | 588.6776 | 620.4956 | 545.9466 | 588.6776 | 620.4956 | 545.9466  | 588.6776 | 620.4956 | 545.9466 | 588.6776 | 620.4956 | 545.9466  | 588.6776 | 620.4956 | 545.9466 | 588.6776 | 620.4956 | 545.9466 | 588.6776 | 620.4956 | 545.9466 | 588.6776 | 620.4956 | 545.9466 | 588.6776 |          |          |
| CUST_43382_P429010886 | M81549 | 0.015669558 | 24     | 18    | 664.2351   | 751.8458                       | 870.8728    | 620.4956 | 545.9466 | 588.6776 | 620.4956 | 545.9466 | 588.6776 | 620.4956 | 545.9466  | 588.6776 | 620.4956 | 545.9466 | 588.6776 | 620.4956 | 545.9466  | 588.6776 | 620.4956 | 545.9466 | 588.6776 | 620.4956 | 545.9466 | 588.6776 | 620.4956 | 545.9466 | 588.6776 | 620.4956 | 545.9466 | 588.6776 |          |          |
| CUST_43382_P429010886 | M81549 | 0.015669558 | 24     | 18    | 664.2351   | 751.8458                       | 870.8728    | 620.4956 | 545.9466 | 588.6776 | 620.4956 | 545.9466 | 588.6776 | 620.4956 | 545.9466  | 588.6776 | 620.4956 | 545.9466 | 588.6776 | 620.4956 | 545.9466  | 588.6776 | 620.4956 | 545.9466 | 588.6776 | 620.4956 | 545.9466 | 588.6776 | 620.4956 | 545.9466 | 588.6776 | 620.4956 | 545.9466 | 588.6776 |          |          |
| CUST_43382_P429010886 | M81549 | 0.015669558 | 24     | 18    | 664.2351   | 751.8458                       | 870.8728    | 620.4956 | 545.9466 | 588.6776 | 620.4956 | 545.9466 | 588.6776 | 620.4956 | 545.9466  | 588.6776 | 620.4956 | 545.9466 | 588.6776 | 620.4956 | 545.9466  | 588.6776 | 620.4956 | 545.9466 | 588.6776 | 620.4956 | 545.9466 | 588.6776 | 620.4956 | 545.9466 | 588.6776 | 620.4956 | 545.9466 | 588.6776 |          |          |
| CUST_43382_P429010886 | M81549 | 0.015669558 | 24     | 18    | 664.2351   | 751.8458                       | 870.8728    | 620.4956 | 545.9466 | 588.6776 | 620.4956 | 545.9466 | 588.6776 | 620.4956 | 545.9466  | 588.6776 | 620.4956 | 545.9466 | 588.6776 | 620.4956 | 545.9466  | 588.6776 | 620.4956 | 545.9466 | 588.6776 | 620.4956 | 545.9466 | 588.6776 | 620.4956 | 545.9466 | 588.6776 | 620.4956 | 545.9466 | 588.6776 |          |          |
| CUST_43382_P429010886 | M81549 | 0.015669558 | 24     | 18    | 664.2351   | 751.8458                       | 870.8728    | 620.4956 | 545.9466 | 588.6776 | 620.4956 | 545.9466 | 588.6776 | 620.4956 | 545.9466  | 588.6776 | 620.4956 | 545.9466 | 588.6776 | 620.4956 | 545.9466  | 588.6776 | 620.4956 | 545.9466 | 588.6776 | 620.4956 | 545.9466 | 588.6776 | 620.4956 | 545.9466 | 588.6776 | 620.4956 | 545.9466 | 588.6776 |          |          |
| CUST_43382_P429010886 | M81549 | 0.015669558 | 24     | 18    | 664.2351   | 751.8458                       | 870.8728    | 620.4956 | 545.9466 | 588.6776 | 620.4956 | 545.9466 | 588.6776 | 620.4956 | 545.9466  | 588.6776 | 620.4956 | 545.9466 | 588.6776 | 620.4956 | 545.9466  | 588.6776 | 620.4956 | 545.9466 | 588.6776 | 620.4956 | 545.9466 | 588.6776 | 620.4956 | 545.9466 | 588.6776 | 620.4956 | 545.9466 | 588.6776 |          |          |
| CUST_43382_P429010886 | M81549 | 0.015669558 | 24     | 18    | 664.2351   | 751.8458                       | 870.8728    | 620.4956 | 545.9466 | 588.6776 | 620.4956 | 545.9466 | 588.6776 | 620.4956 | 545.9466  | 588.6776 | 620.4956 | 545.9466 | 588.6776 | 620.4956 | 545.9466  | 588.6776 | 620.4956 | 545.9466 | 588.6776 | 620.4956 | 545.9466 | 588.6776 | 620.4956 | 545.9466 | 588.6776 | 620.4956 | 545.9466 | 588.6776 |          |          |
| CUST_43382_P429010886 | M81549 | 0.015669558 | 24     | 18    | 664.2351   | 751.8458                       | 870.8728    | 620.4956 | 545.9466 | 588.6776 | 620.4956 | 545.9466 | 588.6776 | 620.4956 | 545.9466  | 588.6776 | 620.4956 | 545.9466 | 588.6776 | 620.4956 | 545.9466  | 588.6776 | 620.4956 | 545.9466 | 588.6776 | 620.4956 | 545.9466 | 588.6776 | 620.4956 | 545.9466 | 588.6776 | 620.4956 | 545.9466 | 588.6776 |          |          |
| CUST_43382_P429010886 | M81549 | 0.015669558 | 24     | 18    | 664.2351   | 751.8458                       | 870.8728    | 620.4956 | 545.9466 | 588.6776 | 620.4956 | 545.9466 | 588.6776 | 620.4956 | 545.9466  | 588.6776 | 620.4956 | 545.9466 | 588.6776 | 620.4956 | 545.9466  | 588.6776 | 620.4956 | 545.9466 | 588.6776 | 620.4956 | 545.9466 | 588.6776 | 620.4956 | 545.9466 | 588.6776 | 620.4956 | 545.9466 | 588.6776 |          |          |
| CUST_43382_P429010886 | M81549 | 0.015669558 | 24     | 18    | 664.2351   | 751.8458                       | 870.8728    | 620.4956 | 545.9466 | 588.6776 | 620.4956 | 545.9466 | 588.6776 | 620.4956 | 545.9466  | 588.6776 | 620.4956 | 545.9466 | 588.6776 | 620.4956 | 545.9466  | 588.6776 | 620.4956 | 545.9466 | 588.6776 | 620.4956 | 545.9466 | 588.6776 | 620.4956 | 545.9466 | 588.6776 | 620.4956 | 545.9466 | 588.6776 |          |          |
| CUST_43382_P429010886 | M81549 | 0.015669558 | 24     | 18    | 664.2351   | 751.8458                       | 870.8728    | 620.4956 | 545.9466 | 588.6776 | 620.4956 | 545.9466 | 588.6776 | 620.4956 | 545.9466  | 588.6776 | 620.4956 | 545.9466 | 588.6776 | 620.4956 | 545.9466  | 588.6776 | 620.4956 | 545.9466 | 588.6776 | 620.4956 | 545.9466 | 588.6776 | 620.4956 | 545.9466 | 588.6776 | 620.4956 | 545.9466 | 588.6776 |          |          |
| CUST_43382_P429010886 | M81549 | 0.015669558 | 24     | 18    | 664.2351   | 751.8458                       | 870.8728    | 620.4956 | 545.9466 | 588.6776 | 620.4956 | 545.9466 | 588.6776 | 620.4956 | 545.9466  | 588.6776 | 620.4956 | 545.9466 | 588.6776 | 620.4956 | 545.9466  | 588.6776 | 620.4956 | 545.9466 | 588.6776 | 620.4956 | 545.9466 | 588.6776 | 620.4956 | 545.9466 | 588.6776 | 620.4956 | 545.9466 | 588.6776 |          |          |
| CUST_43382_P429010886 | M81549 | 0.015669558 | 24     | 18    | 664.2351   | 751.8458                       | 870.8728    | 620.4956 | 545.9466 | 588.6776 | 620.4956 | 545.9466 | 588.6776 | 620.4956 | 545.9466  | 588.6776 | 620.4956 | 545.9466 | 588.6776 | 620.4956 | 545.9466  | 588.6776 | 620.4956 | 545.9466 | 588.6776 | 620.4956 | 545.9466 | 588.6776 | 620.4956 | 545.9466 | 588.6776 | 620.4956 | 545.9466 | 588.6776 |          |          |
| CUST_43382_P429010886 | M81549 | 0.015669558 | 24     | 18    |            |                                |             |          |          |          |          |          |          |          |           |          |          |          |          |          |           |          |          |          |          |          |          |          |          |          |          |          |          |          |          |          |













| Protein ID            | ID      | p-value     | Period | Phase | EBI ID   | Annotation | GO category | Go term  | E-value  | 1        | 2        | 3        | 4        | 5        | 6        | 7        | 8        | 9        | 10       | 11       | 12       | 13       | 14       | 15       | 16       | 17       | 18       | 19       | 20       | 21       | 22       | 23       | 24       | 25       |          |
|-----------------------|---------|-------------|--------|-------|----------|------------|-------------|----------|----------|----------|----------|----------|----------|----------|----------|----------|----------|----------|----------|----------|----------|----------|----------|----------|----------|----------|----------|----------|----------|----------|----------|----------|----------|----------|----------|
| CUST_4083_P429010886  | N15924  | 0.001169034 | 21     | 0     | 56.49359 | 120.7668   | 64.18993    | 79.24842 | 69.04786 | 86.45703 | 89.88808 | 193.0794 | 107.9218 | 146.6334 | 154.1288 | 99.90955 | 72.96184 | 138.5532 | 59.48241 | 141.9381 | 127.2347 | 181.1137 | 113.5928 | 83.73939 | 116.0759 | 92.34598 | 43.54712 | 77.44108 | 165.7838 | 161.6718 | 97.42797 | 100.0000 | 100.0000 | 100.0000 | 100.0000 |
| CUST_2902_P429010886  | N40175  | 0.001169034 | 21     | 0     | 8.576447 | 5.623142   | 9.442955    | 16.70827 | 27.10746 | 17.7162  | 3.95624  | 1.58681  | 10.0000  | 30.0000  | 30.0000  | 30.0000  | 30.0000  | 30.0000  | 30.0000  | 30.0000  | 30.0000  | 30.0000  | 30.0000  | 30.0000  | 30.0000  | 30.0000  | 30.0000  | 30.0000  | 30.0000  | 30.0000  | 30.0000  | 30.0000  | 30.0000  |          |          |
| CUST_49309_P429010886 | N61251  | 0.001169034 | 21     | 0     | 131.5172 | 596.5074   | 72.11934    | 121.2990 | 39.7837  | 39.6836  | 136.6202 | 120.7872 | 337.6339 | 64.1394  | 54.1988  | 133.9575 | 89.3898  | 34.49474 | 184.2718 | 195.1082 | 131.0023 | 120.7872 | 337.6339 | 64.1394  | 54.1988  | 133.9575 | 89.3898  | 34.49474 | 184.2718 | 195.1082 | 131.0023 | 120.7872 | 337.6339 | 64.1394  |          |
| CUST_5360_P429010886  | N18591  | 0.001211088 | 21     | 0     | 155.1864 | 219.338    | 210.3222    | 127.9078 | 207.3436 | 154.854  | 200.0418 | 190.613  | 176.5842 | 165.7121 | 174.1934 | 117.6349 | 161.6064 | 160.737  | 159.2248 | 205.1648 | 247.9707 | 246.4061 | 180.7161 | 191.3144 | 210.8033 | 161.7417 | 217.1005 | 203.4837 | 150.8759 | 168.4022 | 102.2719 | 100.0000 | 100.0000 | 100.0000 |          |
| CUST_3636_P429010886  | N20381  | 0.001211458 | 21     | 3     | 97.34674 | 70.3943    | 119.3087    | 108.883  | 102.7355 | 120.5417 | 97.30769 | 170.5634 | 136.0605 | 100.2889 | 89.1763  | 106.1085 | 110.6073 | 107.6717 | 113.9812 | 161.5414 | 179.9258 | 199.3831 | 138.7116 | 131.196  | 157.3439 | 80.9779  | 82.5507  | 90.3848  | 63.524   | 166.172  | 100.0000 | 100.0000 | 100.0000 |          |          |
| CUST_9124_P429010886  | N24100  | 0.001231781 | 21     | 0     | 137.4411 | 18.7962    | 26.81517    | 15.54734 | 18.0495  | 14.93967 | 18.36321 | 19.7521  | 18.18457 | 22.65185 | 28.8002  | 22.0373  | 26.9245  | 16.1744  | 24.7895  | 24.8292  | 10.04709 | 10.97275 | 11.65098 | 15.62519 | 19.1307  | 14.04152 | 19.0761  | 20.83109 | 14.22358 | 17.92151 | 18.71219 | 100.0000 | 100.0000 | 100.0000 |          |
| CUST_17657_P429010886 | N38362  | 0.001245485 | 21     | 0     | 50.2586  | 99.72832   | 97.76512    | 122.8845 | 36.14885 | 42.93366 | 137.8412 | 184.7027 | 10.76595 | NA       | 11.7456  | 6.44859  | 33.5884  | 8.93282  | 3.70559  | 14.6286  | 16.1744  | NA       | 25.7969  | 195.197  | 17.32508 | 12.14919 | 17.5808  | 11.3535  | 9.74835  | 29.135   | 75.26841 | 100.0000 | 100.0000 | 100.0000 |          |
| CUST_5114_P429010886  | N41202  | 0.001245485 | 21     | 0     | 200.5182 | 12.7046    | 6.9494      | 10.2024  | 10.2024  | 10.2024  | 10.2024  | 10.2024  | 10.2024  | 10.2024  | 10.2024  | 10.2024  | 10.2024  | 10.2024  | 10.2024  | 10.2024  | 10.2024  | 10.2024  | 10.2024  | 10.2024  | 10.2024  | 10.2024  | 10.2024  | 10.2024  | 10.2024  | 10.2024  | 10.2024  | 10.2024  | 10.2024  |          |          |
| CUST_38474_P429010886 | N427138 | 0.001247085 | 21     | 6     | 32.34328 | 12.6607    | 26.0301     | 20.59384 | 21.3859  | 20.0480  | 45.5679  | 55.3716  | 52.0758  | 48.39892 | 20.66527 | 9.95241  | 34.3605  | 12.7506  | 11.2197  | 18.45259 | 17.52252 | 16.0238  | 23.8484  | 12.91646 | 6.699326 | 7.87557  | 17.7566  | 1.936302 | 25.4     |          |          |          |          |          |          |

| Probe ID              | Accession | Gene | p-value     | Period | Phase | EB ID | Annotation | GO category | Go term | E-value  | 0        | 1        | 2        | 3        | 3        | 6        | 6        | 9        | 9        | 9        | 9        | 12       | 12       | 15       | 15       | 18         | 18       | 21       | 21      | 24       | 24 |
|-----------------------|-----------|------|-------------|--------|-------|-------|------------|-------------|---------|----------|----------|----------|----------|----------|----------|----------|----------|----------|----------|----------|----------|----------|----------|----------|----------|------------|----------|----------|---------|----------|----|
| CUST_23144_Pt42010886 | N48361    |      | 0.022196982 | 24     | 21    |       |            |             |         | 32.93541 | 28.25407 | 32.65982 | 32.70202 | 17.60031 | 20.58643 | 21.58123 | 20.31479 | 25.33825 | 38.39235 | 25.34843 | 44.37502 | 18.92222 | 27.05191 | 41.03792 | 25.65354 | 33.15355   | 33.15745 | 52.75604 | 28.7347 | 37.10697 |    |
| CUST_23144_Pt42010886 | N48361    |      | 0.022196982 | 24     | 21    |       |            |             |         | 32.93541 | 28.25407 | 32.65982 | 32.70202 | 17.60031 | 20.58643 | 21.58123 | 20.31479 | 25.33825 | 38.39235 | 25.34843 | 44.37502 | 18.92222 | 27.05191 | 41.03792 | 25.65354 | 33.15355   | 33.15745 | 52.75604 | 28.7347 | 37.10697 |    |
| CUST_23144_Pt42010886 | N48361    |      | 0.022196982 | 24     | 21    |       |            |             |         | 32.93541 | 28.25407 | 32.65982 | 32.70202 | 17.60031 | 20.58643 | 21.58123 | 20.31479 | 25.33825 | 38.39235 | 25.34843 | 44.37502 | 18.92222 | 27.05191 | 41.03792 | 25.65354 | 33.15355   | 33.15745 | 52.75604 | 28.7347 | 37.10697 |    |
| CUST_23144_Pt42010886 | N48361    |      | 0.022196982 | 24     | 21    |       |            |             |         | 32.93541 | 28.25407 | 32.65982 | 32.70202 | 17.60031 | 20.58643 | 21.58123 | 20.31479 | 25.33825 | 38.39235 | 25.34843 | 44.37502 | 18.92222 | 27.05191 | 41.03792 | 25.65354 | 33.15355   | 33.15745 | 52.75604 | 28.7347 | 37.10697 |    |
| CUST_23144_Pt42010886 | N48361    |      | 0.022196982 | 24     | 21    |       |            |             |         | 32.93541 | 28.25407 | 32.65982 | 32.70202 | 17.60031 | 20.58643 | 21.58123 | 20.31479 | 25.33825 | 38.39235 | 25.34843 | 44.37502 | 18.92222 | 27.05191 | 41.03792 | 25.65354 | 33.15355   | 33.15745 | 52.75604 | 28.7347 | 37.10697 |    |
| CUST_23144_Pt42010886 | N48361    |      | 0.022196982 | 24     | 21    |       |            |             |         | 32.93541 | 28.25407 | 32.65982 | 32.70202 | 17.60031 | 20.58643 | 21.58123 | 20.31479 | 25.33825 | 38.39235 | 25.34843 | 44.37502 | 18.92222 | 27.05191 | 41.03792 | 25.65354 | 33.15355   | 33.15745 | 52.75604 | 28.7347 | 37.10697 |    |
| CUST_23144_Pt42010886 | N48361    |      | 0.022196982 | 24     | 21    |       |            |             |         | 32.93541 | 28.25407 | 32.65982 | 32.70202 | 17.60031 | 20.58643 | 21.58123 | 20.31479 | 25.33825 | 38.39235 | 25.34843 | 44.37502 | 18.92222 | 27.05191 | 41.03792 | 25.65354 | 33.15355   | 33.15745 | 52.75604 | 28.7347 | 37.10697 |    |
| CUST_23144_Pt42010886 | N48361    |      | 0.022196982 | 24     | 21    |       |            |             |         | 32.93541 | 28.25407 | 32.65982 | 32.70202 | 17.60031 | 20.58643 | 21.58123 | 20.31479 | 25.33825 | 38.39235 | 25.34843 | 44.37502 | 18.92222 | 27.05191 | 41.03792 | 25.65354 | 33.15355   | 33.15745 | 52.75604 | 28.7347 | 37.10697 |    |
| CUST_23144_Pt42010886 | N48361    |      | 0.022196982 | 24     | 21    |       |            |             |         | 32.93541 | 28.25407 | 32.65982 | 32.70202 | 17.60031 | 20.58643 | 21.58123 | 20.31479 | 25.33825 | 38.39235 | 25.34843 | 44.37502 | 18.92222 | 27.05191 | 41.03792 | 25.65354 | 33.15355   | 33.15745 | 52.75604 | 28.7347 | 37.10697 |    |
| CUST_23144_Pt42010886 | N48361    |      | 0.022196982 | 24     | 21    |       |            |             |         | 32.93541 | 28.25407 | 32.65982 | 32.70202 | 17.60031 | 20.58643 | 21.58123 | 20.31479 | 25.33825 | 38.39235 | 25.34843 | 44.37502 | 18.92222 | 27.05191 | 41.03792 | 25.65354 | 33.15355   | 33.15745 | 52.75604 | 28.7347 | 37.10697 |    |
| CUST_23144_Pt42010886 | N48361    |      | 0.022196982 | 24     | 21    |       |            |             |         | 32.93541 | 28.25407 | 32.65982 | 32.70202 | 17.60031 | 20.58643 | 21.58123 | 20.31479 | 25.33825 | 38.39235 | 25.34843 | 44.37502 | 18.92222 | 27.05191 | 41.03792 | 25.65354 | 33.15355</ |          |          |         |          |    |





















| Probe ID               | ID      | p-value     | Period | Phase | EBI ID | Annotation                                  | GO category             | Go term                                | E-value  | 0        | 1        | 2        | 3        | 4        | 5        | 6        | 7        | 8        | 9        | 10       | 11       | 12       | 13       | 14       | 15       | 16       | 17       | 18       | 19       | 20        | 21       | 22       | 23       | 24       |          |          |
|------------------------|---------|-------------|--------|-------|--------|---------------------------------------------|-------------------------|----------------------------------------|----------|----------|----------|----------|----------|----------|----------|----------|----------|----------|----------|----------|----------|----------|----------|----------|----------|----------|----------|----------|----------|-----------|----------|----------|----------|----------|----------|----------|
| CUST_53772_Pt429010886 | M103123 | 0.03249824  | 24     | 15    |        |                                             |                         |                                        | 22.60277 | 31.82327 | 32.16695 | 26.5011  | 18.74591 | 25.49698 | 20.819   | 37.58637 | 41.95534 | 24.16822 | 39.63021 | 38.74481 | 15.33773 | 38.76999 | 35.0396  | 55.88596 | 41.50754 | 51.75972 | 41.22261 | 26.36289 | 50.1877  | 65.83412  | 39.16223 | 45.91877 | 50.29492 | 48.23305 | 24.91503 |          |
| CUST_54474_Pt429010886 | M105657 | 0.03249824  | 24     | 9     |        | 242007718 cuttle protein, putative [Pedicul |                         |                                        | 6.81E-12 | 263.0994 | 59.48241 | 52.22249 | 48.17454 | 72.85755 | 90.01966 | 210.4634 | 40.49004 | 14.78725 | 331.9294 | 110.9363 | 92.87822 | 244.9872 | 88.98877 | 65.27494 | 97.32033 | 33.92845 | 131.9455 | 146.631  | 61.15056 | 63.2206   | 25.09365 | 40.16939 | 46.66635 | 17.82881 | 97.59576 | 54.00744 |
| CUST_53722_Pt429010886 | M4940   | 0.03249824  | 24     | 15    |        |                                             |                         |                                        | 113.1623 | 177.132  | 138.237  | 109.5041 | 131.2992 | 111.5887 | 103.5163 | 148.4008 | 140.1008 | 135.9613 | 135.7824 | 144.8612 | 142.9618 | 153.1388 | 121.221  | 135.7428 | 125.1466 | 168.3995 | 146.9613 | 162.027  | 116.027  | 149.711   | 137.2652 | 118.7882 | 171.9576 | 131.8579 | 131.8579 |          |
| CUST_57590_Pt429010886 | M104643 | 0.03249824  | 24     | 15    |        | 32146804 Putative protein DAPPLDRA          | Nucleic acid metabolism | RNA metabolic process                  | 8.7E-12  | 59.41831 | 40.6209  | 59.40855 | 51.01952 | 45.0197  | 87.56409 | 101.6279 | 101.6279 | 101.6279 | 101.6279 | 101.6279 | 101.6279 | 101.6279 | 101.6279 | 101.6279 | 101.6279 | 101.6279 | 101.6279 | 101.6279 | 101.6279 | 101.6279  | 101.6279 | 101.6279 | 101.6279 | 101.6279 | 101.6279 |          |
| CUST_46768_Pt429010886 | M73671  | 0.03249824  | 24     | 3     |        | 374719840 tyrosinogen 1 [Litopenaeus        | vann-Protein metabolism | Proteolysis                            | 1.4E-17  | 3558.043 | 34.22563 | 3821.159 | 3640.946 | 3522.391 | 3301.049 | 20.023   | 203.253  | 32.6721  | 3675.9   | 427.56   | 3503.62  | 3202.946 | 355.945  | 359.904  | 378.118  | 20.296   | 53.04169 | 230.0139 | 383.5463 | 451.651   | 268.102  | 2761.678 | 37.0131  | 65.9404  | 262.364  | 1736.886 |
| CUST_52062_Pt429010886 | M96283  | 0.03249824  | 24     | 21    |        |                                             |                         |                                        | 3301.049 | 490.081  | 4383.174 | 4560.3   | 4640.1   | 3301.048 | 3715.857 | 387.1525 | 4288.408 | 486.85   | 3322.565 | 31.16    | 31.6     | 4694.435 | 2636.073 | 350.087  | 340.519  | 4783.413 | 4733.255 | 3867.347 | 3774.541 | 65.176    | 5298.6   | 3690.329 | 6358.535 | 3886.96  | 2601.101 | 6265.89  |
| CUST_5509_Pt429010886  | N18254  | 0.03249824  | 24     | 15    |        |                                             | Protein metabolism      | Regulation of translational elongation | 649.314  | 1322.806 | 875.0518 | 770.654  | 756.356  | 685.4537 | 981.108  | 762.319  | 893.7709 | 848.743  | 762.188  | 741.6851 | 724.9498 | 749.358  | 737.145  | 113.925  | 149.848  | 146.514  | 24.714   | 967.713  | 947.738  | 1069.78   | 696.508  | 906.814  | 960.498  | 896.609  | 894.731  | 1117.04  |
| CUST_5547_Pt429010886  | N18846  | 0.03249824  | 24     | 15    |        | 242006614 Chondroitin sulfate synthase, pu  | Metabolic process       | Carbohydrate metabolism                | 101.4958 | 51.0875  | 118.8271 | 96.14621 | 101.105  | 107.7085 | 108.8522 | 140.2936 | 115.6261 | 103.9519 | 103.3439 | 110.3551 | 103.1607 | 110.9284 | 107.713  | 127.123  | 159.6647 | 167.9694 | 113.666  | 127.539  | 105.939  | 115.29304 | 110.6304 | 115.8222 | 122.9157 | 117.1085 | 137.069  | 137.069  |
| CUST_72920_Pt429010886 | N59641  | 0.03249824  | 24     | 15    |        | 321475277 putative protein DAPPLDRA         |                         |                                        | 1.27E-30 | 8.724815 | 7.24584  | 6.403672 | 6.03883  | 8.155254 | 4.717564 | 9.547929 | 6.432193 | 7.895218 | 12.12574 | 13.69996 | 14.60789 | 12.78096 | 8.818102 | 11.21622 | 18.53984 | 38.89189 | 10.6034  | 6.064462 | 6.784619 | 11.61188  | 10.30337 | 14.04254 | 14.28052 | 16.82913 | 10.29995 | 13.47429 |
| CUST_53075_Pt429010886 | M50595  | 0.032500675 | 18     | 3     |        |                                             |                         |                                        | 7.692322 | 12.81892 | 7.97021  | 11.55509 | 10.65258 | NA       | 12.66063 | 10.1214  | 34.8806  | 6.152029 | 12.0389  | 5.305305 | 6.76308  | 6.55377  | 11.0137  | 12.0389  | 8.85422  | 9.32159  | 16.59634 | 11.7027  | 12.019   | 9.90188   | 8.49616  | 14.25399 | 14.25399 | 14.25399 | 14.25399 |          |
| CUST_54325_Pt429010886 | M105588 | 0.032505044 | 12     | 0     |        |                                             |                         |                                        | 345.674  | 205.336  | 420.9575 | 263.0051 | 283.719  | 281.0852 | 196.9837 | 10.2325  | 124.246  | 300.987  | 124.246  | 300.987  | 124.246  | 300.987  | 124.246  | 300.987  | 124.246  | 300.987  | 124.246  | 300.987  | 124.246  | 300.987   | 124.246  | 300.987  | 124.246  | 300.987  | 124.246  |          |
| CUST_46388_Pt429010886 | M72494  | 0.032553628 | 24     | 0     |        |                                             |                         |                                        | 218.0736 | 203.392  | 247.8796 | 187.743  | 136.9272 | 169.1953 | 205.2408 | 176.176  | 175.8536 | 204.3998 | 160.443  | 200.7515 | 223.27   | 174.1094 | 169.615  | 21.542   | 199.2487 | 227.5418 | 168.094  | 199.4568 | 203.7634 | 253.2436  | 215.368  | 236.636  | 241.364  | 204.780  | 272.3474 |          |
| CUST_54342_Pt429010886 | M105646 | 0.032588308 | 18     | 3     |        |                                             |                         |                                        | 84.40775 | 75.1848  | 80.87979 | 78.21297 | 79.85523 | 112.0084 | 73.9504  | 68.2401  | 81.66229 | 83.0013  | 84.47977 | 90.74217 | 69.3377  | 56.60765 | 51.14752 | 78.9332  | 72.73375 | 66.17651 | 101.6904 | 68.0845  | 106.2362 | 123.684   | 93.1786  | 93.03552 | 105.3366 | 70.1408  | 87.29007 |          |
| CUST_36184_Pt429010886 | N14914  | 0.03265339  | 15     | 12    |        |                                             |                         |                                        | 37.03185 | 38.21796 | 34.70591 | 38.7948  | 24.26626 | 30.46326 | 14.60205 | 7.28079  | 7.79307  | 28.15548 | 34.49684 | 18.16224 | 27.65805 | 6.437589 | 45.23057 | 25.97377 | 32.61311 | 21.2619  | 14.017   | 20.66527 | 17.7884  | 20.96576  | 12.68456 | 15.4017  | 24.0004  | 7.584815 | 10.08986 |          |
| CUST_14841_Pt429010886 | N33558  | 0.03266396  | 15     | 12    |        |                                             |                         |                                        | 12.77466 | 31.3922  | 16.80142 | 10.3598  | 34.9776  | 22.02956 | 15.28733 | 12.76875 | 11.93703 | 18.94289 | 38.86176 | 23.9863  | 19.56089 | 26.03986 | 27.28196 | 27.03026 | 12.96227 | 10.12252 | 10.60449 | 16.6847  | 20.9225  | 10.74279  | 23.7345  | 88.6778  | 10.81694 | 10.81694 |          |          |
| CUST_33875_Pt429010886 | M50595  | 0.03269675  | 18     | 3     |        | 321454613 hypothetical protein DAPPLDRA     | Reproduction            |                                        | 1.48E-27 | 15.38781 | 11.3854  | 17.0629  | 15.85237 | 12.53757 | 24.5201  | 24.21    | 10.981   | 10.981   | 10.981   | 10.981   | 10.981   | 10.981   | 10.981   | 10.981   | 10.981   | 10.981   | 10.981   | 10.981   | 10.981   | 10.981    | 10.981   | 10.981   | 10.981   | 10.981   | 10.981   |          |
| CUST_33811_Pt429010886 | M7937   | 0.032697923 | 18     | 9     |        |                                             |                         |                                        | 12.6936  | 32.0874  | 9.6319   | 10.2562  | 106.1034 | 130.586  | 187.286  | 16.1938  | 140.444  | 88.9466  | 10.9371  | 14.8573  | 14.365   | 21.5442  | 54.6882  | 18.2767  | 263.0521 | 21.695   | 182.874  | 12.7249  | 37.10960 | 77.074    | 176.3067 | 131.8269 | 163.027  | 86.76078 |          |          |
| CUST_51875_Pt429010886 | M95501  | 0.03267923  | 18     | 9     |        |                                             |                         |                                        | 25.99138 | 38.17039 | 34.3958  | 34.10653 | 37.9456  | 23.4912  | 12.30427 | 26.2688  | 36.58776 | 36.26082 | 62.85008 | 61.4814  | 43.8242  | 27.2337  | 28.5948  | 58.59563 | 51.51478 | 26.62997 | 27.24369 | 34.98836 | 2.81966  | 37.28898  | 20.7429  | 39.57952 | 52.7623  | 34.20262 |          |          |
| CUST_43599_Pt429010886 | M63468  | 0.032678771 | 18     | 0     |        |                                             |                         |                                        | 539.363  | 495.7052 | 8.381188 | 16.7786  | 16.71688 | 169.794  | 485.5854 | 297.949  | 183.7643 | 25.6743  | 16.7045  | 7.35023  | 59.6688  | 281.364  | 30.93842 | 51.0806  | 143.5029 | 183.747  | 21.912   | 356.6056 | 330.9867 | NA        | 478.7694 | NA       | 68.32149 | 281.9884 | 11.20624 |          |
| CUST_31248_Pt429010886 | N1072   | 0.032727317 | 24     | 15    |        |                                             |                         |                                        | 155.0383 | 224.4732 | 172.8416 | 129.5335 | 110.45   | 133.2    | 155.4242 | 143.2463 | 171.8869 | 153.7269 | 126.6473 | 148.9461 | 115.137  | 127.2489 | 147.368  | 139.986  | 186.0269 | 136.701  | 145.5634 | 162.5974 | 197.3862 | 178.4726  | 194.312  | 229.9275 | 192.4672 | 146.8442 | 229.7005 |          |
| CUST_72465_Pt429010886 | N54289  | 0.032727317 | 24     | 15    |        |                                             |                         |                                        | 33.28409 | 21.2976  | 25.9963  | 23.7866  | 13.48993 | 20.25    | 55.5978  | 13.34535 | 33.0027  | 30.13995 | 16.3995  | 14.76512 | 24.27767 | 15.3518  | 16.95612 | 24.51979 | 34.52377 | 21.18876 | 31.82327 | 31.43021 | 21.81628 | 38.8575   | 31.3584  | 68.6316  | 35.74567 | 32.008   | 19.9187  | 43.5017  |
| CUST_40972_Pt429010886 | M58033  | 0.032710075 | 24     | 21    |        |                                             |                         |                                        | 16.566   | 25.45483 | 22.61783 | 14.1297  | 22.72424 | 20.97815 | 16.41661 | 30.0427  | 24.88059 | 21.98453 | 17.05901 | 20.4011  | 18.75259 | 19.15804 | 18.83479 | 36.2494  | 26.30955 | 17.7940  | 33.62389 | 24.80368 | 28.95719 | 25.0763   | 30.59535 | 37.75153 | 27.23388 | 24.38824 | 43.51485 |          |
| CUST_37953_Pt429010886 | M22448  | 0.032752805 | 24     | 18    |        | 386376737 hematoopoietic prostaglandin D    |                         |                                        | 6.34E-52 | 157.2999 | 506.1561 | 295.1733 | 254.9324 | 111.388  | 283.419  | 176.987  | 536.489  | 616.509  | 316.714  | 216.8807 | 199.1442 | 167.2992 | 136.464  | 361.3178 | 451.2333 | 626.641  | 545.4269 | 605.4928 | 401.9403 | 436.0075  | 556.816  | 603.021  | 297.8825 | 632.1075 |          |          |
| CUST_24622_Pt429010886 | N50962  | 0.032752805 | 24     | 21    |        |                                             |                         |                                        | 15.4442  | 20.24228 | 30.09026 | 17.7611  | 17.07298 | 10.56444 | 19.7933  | 15.48486 | 15.26493 | 23.24605 | 15.3457  | 22.77225 | 18.7439  | 15.494   | 13.1     | 27.9273  | 31.6175  | 21.48961 | 35.15693 | 16.17891 | 20.02072 | 32.90224  | 21.4212  | 25.04161 | 27.51681 | 19.04014 | 30.14806 |          |
| CUST_16242_Pt429010886 | N35902  | 0.032781002 | 21     | 3     |        |                                             |                         |                                        | 45.614   | 61.13851 | 62.38786 | 49.79663 | 62.38786 | 52.77231 | 63.05176 | 57.53339 | 57.53339 | 57.53339 | 57.53339 | 57.53339 | 57.53339 | 57.53339 | 57.53339 | 57.53339 | 57.53339 | 57.53339 | 57.53339 | 57.53339 | 57.53339 | 57.53339  | 57.53339 | 57.53339 | 57.53339 | 57.53339 | 57.53339 |          |
| CUST_46544_Pt429010886 | M72948  | 0.032792859 | 15     | 0     |        | 3039666 ribosomal protein L8 [Litopenae     |                         |                                        | 1.84E-17 | 898.791  | 11.8262  | 1108.146 | 896.609  | 818.0748 | 95.5005  | 1082.664 | 913.1879 | 1266.211 | 961.2009 | 728.817  | 762.449  | 95.8542  | 89.8576  | 138.1886 | 1115.336 | 150.065  | 1262.104 | 914.2819 | 123.227  | 1008.478  | 171.962  | 787.3897 | 944.928  | 852.5352 | 655.6894 |          |
| CUST_3089_Pt429010886  | M14543  | 0.032794117 | 24     | 18    |        | 330367404 Glycosyl bismucatus act mRNA f    |                         |                                        | 3786.16  | 12.4016  | 12.4016  | 12.4016  | 12.4016  | 12.4016  | 12.4016  | 12.4016  | 12.4016  | 12.4016  | 12.4016  | 12.4016  | 12.4016  | 12.4016  | 12.4016  | 12.4016  | 12.4016  | 12.4016  | 12.4016  | 12.4016  | 12.4016  | 12.4016   | 12.4016  | 12.4016  | 12.4016  | 12.4016  | 12.4016  |          |
| CUST_1881_Pt429010886  | N10766  | 0.032794117 | 24     | 18    |        |                                             |                         |                                        | 1189.292 | 221.5335 | 140.1134 | 136.6774 | 67.7359  | 590.825  | 133.3858 | 79.0084  | 65.562   | 768.979  | 98.7247  | 32.944   | 184.868  | 161.5157 | 734.4362 | 759.7943 | 166.342  | 156.2628 | 37.294   | 2198.578 | 1549.756 | 253.537   | 1608.479 | 1751.883 | 2080.932 | 1888.631 | 901.771  | 271.1745 |
| CUST_842_Pt429010886   | N7506   | 0.032795301 | 21     | 18    |        | 4427690                                     |                         |                                        |          |          |          |          |          |          |          |          |          |          |          |          |          |          |          |          |          |          |          |          |          |           |          |          |          |          |          |          |

[illegible]









[illegible]



| Prote ID               | ID      | p-value     | Period | Phase | EBI ID | Annotation                                                  | GO category                           | Go term                        | E-value    | 0          | 1          | 2          | 3          | 4          | 5          | 6          | 7          | 8          | 9          | 10         | 11         | 12         | 13         | 14         | 15         | 16         | 17         | 18         | 19         | 20         | 21         | 22         | 23         | 24         |            |          |
|------------------------|---------|-------------|--------|-------|--------|-------------------------------------------------------------|---------------------------------------|--------------------------------|------------|------------|------------|------------|------------|------------|------------|------------|------------|------------|------------|------------|------------|------------|------------|------------|------------|------------|------------|------------|------------|------------|------------|------------|------------|------------|------------|----------|
| CUST_51146_Pt429010886 | M92367  | 0.042941542 | 12     | 0     |        |                                                             |                                       |                                | 12.08009   | 31.71972   | 11.15099   | 7.153945   | 12.65976   | 10.39972   | 7.124762   | 4.982765   | 6.824273   | 2.922263   | 9.665024   | 15.76766   | 8.951327   | 9.54303    | 12.12549   | 6.784613   | 3.921285   | 10.21029   | 5.038532   | 5.190574   | 5.452796   | 6.368124   | NA         | 14.90046   | 10.25642   | 8.263401   | 15.68303   |          |
| CUST_52738_Pt429010886 | E2797   | 0.04294169  | 14     | 0     |        | 122082005 RecName: A6056 ribosomal protein metabolism       | Ribosome biogenesis                   |                                | 1.00015    | 6.000152   | 11323.45   | 7966.321   | 7585.802   | 61116.36   | 6298.27    | 9425.197   | 9500.977   | 9425.197   | 7653.847   | 3286.945   | 5921.175   | 8713.974   | 64.6868    | 6193.269   | 12317.37   | 12699.11   | 12736.09   | 8215.523   | 9793.347   | 9999.789   | 6854.464   | 8929.115   | 8362.147   | 8484.924   | 9804.488   | 5884.758 |
| CUST_41088_Pt429010886 | M56848  | 0.04294169  | 24     | 0     |        | 307204038 Zinc finger protein Xfln [Harpag]                 | Proteolysis                           |                                | 1.177615   | 65.51653   | 95.08224   | 76.49879   | 74.01283   | 67.07909   | 58.99279   | 62.00696   | 62.00696   | 62.00696   | 62.00696   | 62.00696   | 62.00696   | 62.00696   | 62.00696   | 62.00696   | 62.00696   | 62.00696   | 62.00696   | 62.00696   | 62.00696   | 62.00696   | 62.00696   | 62.00696   | 62.00696   | 62.00696   | 62.00696   |          |
| CUST_51680_Pt429010886 | M4586   | 0.04294171  | 20     | 0     |        | 291241774 PREDICTED: CG1009like [Sacca]Protein metabolism   | Proteolysis                           |                                | 7.42E-49   | 37.89797   | 19.57186   | 14.42524   | 8.90368    | 30.24929   | 35.26099   | 35.26099   | 35.26099   | 35.26099   | 35.26099   | 35.26099   | 35.26099   | 35.26099   | 35.26099   | 35.26099   | 35.26099   | 35.26099   | 35.26099   | 35.26099   | 35.26099   | 35.26099   | 35.26099   | 35.26099   | 35.26099   | 35.26099   | 35.26099   |          |
| CUST_33456_Pt429010886 | M9723   | 0.04294169  | 24     | 0     |        |                                                             |                                       |                                | 205.14681  | 391.5717   | 271.7534   | 237.2055   | 286.2998   | 246.2034   | 306.9062   | 324.9663   | 319.0038   | 269.7389   | 225.4772   | 300.8628   | 298.1058   | 298.1058   | 298.1058   | 298.1058   | 298.1058   | 298.1058   | 298.1058   | 298.1058   | 298.1058   | 298.1058   | 298.1058   | 298.1058   | 298.1058   | 298.1058   | 298.1058   |          |
| CUST_6907_Pt429010886  | N20763  | 0.04294169  | 24     | 0     |        |                                                             | Metabolic process                     | Carbohydrate metabolic process |            | 93.54583   | 40.5077    | 41.71225   | 51.80751   | 14.50259   | 21.65828   | 56.8286    | 123.7668   | 138.7688   | 184.7058   | 80.7397    | 65.5147    | 90.3409    | 149.9518   | 37.62021   | 91.98008   | 68.83252   | 200.1541   | 134.0912   | 106.1281   | 107.1847   | 111.653    | 126.2187   | 81.9833    | 194.2319   | 47.6504    | 143.7606 |
| CUST_6944_Pt429010886  | N20813  | 0.04294169  | 24     | 0     |        |                                                             |                                       |                                | 366.6368   | 177.5574   | 341.3579   | 343.1884   | 410.264    | 314.6041   | 467.0581   | 636.557    | 567.0251   | 408.3889   | 423.2638   | 395.137    | 399.0879   | 388.221    | 418.7694   | 639.524    | 789.6051   | 649.4957   | 513.7138   | 541.3579   | 678.3225   | 434.3661   | 569.1398   | 561.3058   | 555.5824   | 466.337    | 613.7905   |          |
| CUST_55703_Pt429010886 | M113176 | 0.042941701 | 24     | 0     |        |                                                             |                                       |                                | 335.5615   | 384.0543   | 435.731    | 348.964    | 284.4024   | 301.3784   | 304.7866   | 297.3109   | 346.4474   | 392.3777   | 330.7777   | 354.1831   | 321.0979   | 309.709    | 258.9723   | 400.7915   | 374.0444   | 415.5107   | 312.8082   | 348.11     | 307.499    | 385.6874   | 364.9578   | 403.7519   | 479.6967   | 428.9433   | 574.9115   |          |
| CUST_41556_Pt429010886 | M58023  | 0.042941701 | 24     | 0     |        |                                                             |                                       |                                | 268.1907   | 422.5065   | 364.6392   | 325.1633   | 383.5663   | 281.628    | 327.738    | 345.359    | 327.6087   | 348.0027   | 262.2441   | 306.0384   | 302.0161   | 289.1173   | 317.3954   | 389.401    | 417.2642   | 422.6098   | 242.6098   | 256.6289   | 405.4699   | 396.7957   | 347.6032   | 490.2242   | 409.7628   | 451.1049   |            |          |
| CUST_51680_Pt429010886 | M4586   | 0.04294171  | 20     | 0     |        |                                                             |                                       |                                | 123.0596   | 92.0174    | 105.7248   | 80.16937   | 92.48145   | 70.41229   | 148.85     | 99.2004    | 101.588    | 63.0055    | 92.28654   | 82.26509   | 121.367    | 73.26943   | 93.2643    | 98.28818   | 97.2956    | 95.50727   | 81.80549   | 99.94989   | 82.70095   | 82.05798   | 102.1812   | 95.30674   | 98.63138   |            |            |          |
| CUST_38116_Pt429010886 | M23425  | 0.042920435 | 24     | 0     |        |                                                             |                                       |                                | 122.8382   | 94.5081    | 108.826    | 156.2311   | 73.88231   | 98.94038   | 128.7515   | 95.4137    | 115.350    | 133.7683   | 77.5823    | 84.967     | 100.3167   | 96.6485    | 65.1463    | 171.0519   | 115.8095   | 124.9534   | 205.1901   | 119.653    | 109.719    | 190.0057   | 145.367    | 170.0851   | 192.658    | 593.3138   | 147.499    |          |
| CUST_16642_Pt429010886 | N36616  | 0.042920435 | 24     | 0     |        | 321466204 hypothetical protein DAPPUA3Signal transduction   | Other                                 |                                | 5.82E-45   | 90.29464   | 140.4625   | 117.8894   | 73.93156   | 58.6831    | 99.1047    | 112.4213   | 143.7613   | 83.3668    | 107.0618   | 93.73127   | 21.05642   | 87.92365   | 83.8415    | 164.9616   | 125.3435   | 124.0944   | 149.0161   | 124.2385   | 141.0554   | 119.9097   | 119.3101   | 115.1511   | 140.7362   | 125.359    | 135.8996   |          |
| CUST_16642_Pt429010886 | N36782  | 0.042920435 | 24     | 0     |        | 442628732 dynamical associated protein 160 Cellular Process | Cell differentiation                  |                                | 5.48E-15   | 27.10146   | 46.2467    | 26.90764   | 23.59077   | 23.36033   | 17.34869   | 21.62961   | 20.79352   | 21.23124   | 21.89097   | 22.71362   | 22.93484   | 24.69407   | 27.75058   | 16.40975   | 19.10616   | 21.44313   | 20.58774   | 23.70482   | 28.42867   | 26.36597   | 26.36597   | 26.36597   | 26.36597   | 26.36597   | 26.36597   |          |
| CUST_18006_Pt429010886 | N38988  | 0.042920435 | 24     | 0     |        |                                                             |                                       |                                | 159.5479   | 108.9127   | 122.5544   | 118.2333   | 67.10107   | 70.80959   | 67.36564   | 82.05798   | 93.5245    | 91.39547   | 113.622    | 91.703     | 81.64232   | 129.2319   | 122.7652   | 145.7645   | 84.8542    | 114.2404   | 118.7604   | 81.2327    | 72.9666    | 153.028    | 108.9478   | 145.139    | 194.148    | 104.1579   | 153.6425   |          |
| CUST_18006_Pt429010886 | N38988  | 0.042920435 | 24     | 0     |        |                                                             |                                       |                                | 60.03989   | 174.6626   | 120.5584   | 135.5515   | 83.89281   | 24.80959   | 88.6413    | 139.167    | 90.3883    | 90.995     | 94.3967    | 97.24189   | 113.9102   | 100.1152   | 42.2249    | 62.29616   | 67.0724    | 64.8149    | 28.7923    | 61.7973    | 24.7923    | 71.1717    | 194.635    | 108.4949   | 185.653    | 354.7454   | 173.1969   | 299.6025 |
| CUST_51680_Pt429010886 | M4586   | 0.04294171  | 20     | 0     |        | 345493243 PREDICTED: ELMO domain-cont                       | Vesicle-mediated transport            |                                | 2.06E-73   | 37.6919    | 24.6188    | 28.8117    | 20.41923   | 40.7214    | 20.41923   | 40.7214    | 20.41923   | 40.7214    | 20.41923   | 40.7214    | 20.41923   | 40.7214    | 20.41923   | 40.7214    | 20.41923   | 40.7214    | 20.41923   | 40.7214    | 20.41923   | 40.7214    | 20.41923   | 40.7214    | 20.41923   | 40.7214    | 20.41923   | 40.7214  |
| CUST_34568_Pt429010886 | M36700  | 0.042920497 | 15     | 6     |        |                                                             |                                       |                                | 186.9781   | 418.3708   | 367.2975   | 221.596    | 166.838    | 136.8029   | 416.3476   | 456.3454   | 359.6659   | 322.5903   | 249.4703   | 382.9427   | 269.1782   | 331.2053   | 236.5827   | 248.1463   | 405.3815   | 244.0924   | 435.391    | 511.9251   | 383.9729   | 437.1787   | 426.8467   | 281.7476   | 438.985    | 915.8802   |            |          |
| CUST_25828_Pt429010886 | N53127  | 0.042925768 | 21     | 3     |        |                                                             |                                       |                                | 9.721842   | 33.95508   | 12.46756   | 18.34607   | NA         | 7.625274   | NA         | 14.14404   | 8.571034   | NA         | 9.524903   | 16.52409   | NA         | 7.894262   | 16.27462   | 6.869765   | 0.005861   | 7.619216   | 6.614583   | 4.909031   | 7.637574   | 13.6023    | 11.84988   | 11.10999   | 10.77749   | 11.69443   | 9.935805   |          |
| CUST_56545_Pt429010886 | M23102  | 0.042620341 | 24     | 3     |        |                                                             |                                       |                                | 6.7911414  | NA         | 620.1489   | 807.399    | NA         | 509.9240   | 10.86877   | 73.65688   | 5.237092   | 66.7696    | 93.736     | 10.86877   | 73.65688   | 5.237092   | 66.7696    | 93.736     | 10.86877   | 73.65688   | 5.237092   | 66.7696    | 93.736     | 10.86877   | 73.65688   | 5.237092   | 66.7696    | 93.736     | 10.86877   | 73.65688 |
| CUST_56545_Pt429010886 | M14059  | 0.042620348 | 24     | 3     |        |                                                             |                                       |                                | 132.4791   | 26.525     | 224.1099   | 144.0984   | 122.6959   | 116.8399   | 208.2068   | 234.1352   | 237.6854   | 190.9992   | 140.6285   | 175.4515   | 176.5278   | 147.7749   | 147.2139   | 203.264    | 253.5695   | 286.404    | 248.9453   | 20.785     | 188.488    | 158.848    | 158.848    | 172.2883   | 230.9204   | 176.549    | 226.355    |          |
| CUST_41872_Pt429010886 | M58761  | 0.042620348 | 24     | 3     |        |                                                             |                                       |                                | 44.79025   | 45.27834   | 77.7319    | 37.14951   | 46.40767   | 41.15185   | 48.92214   | 53.44992   | 58.3384    | 56.94021   | 64.61049   | 50.74506   | 60.53467   | 66.86808   | 46.3034    | 82.73518   | 76.78462   | 74.14598   | 68.2331    | 57.2256    | 55.5499    | 57.2256    | 55.5499    | 57.2256    | 55.5499    | 57.2256    | 55.5499    |          |
| CUST_41552_Pt429010886 | M62217  | 0.042620499 | 24     | 3     |        | 317419745 Diphthamide biosynthesis prote                    | Cellular protein modification process |                                | 4.23E-19   | 34.92175   | 49.44002   | 51.3571    | 24.53212   | 29.12055   | 26.01873   | 30.87462   | 34.80088   | 27.89647   | 40.88003   | 35.29764   | 41.91595   | 46.1051    | 52.97991   | 36.79167   | 14.03224   | 45.90992   | 45.95236   | 28.2536    | 26.5207    | 93.8254    | 46.3071    | 42.2058    | 45.47301   | 30.9758    | 35.2472    | 40.19911 |
| CUST_14920_Pt429010886 | N28608  | 0.042661479 | 18     | 3     |        | 321468138 hypothetical protein DAPPUA2Transport             | Transmembrane transport               |                                | 8.31E-13   | 16.60231   | 18.57988   | 17.7621    | 28.89015   | 8.435707   | 12.65976   | 43.74346   | 39.5264    | 8.89647    | 12.2558    | 87.74995   | 36.87147   | 40.9561    | 33.22428   | 17.86008   | 40.10788   | 43.73952   | 50.2799    | 31.90996   | 11.9886    | 45.29027   | 28.33805   | 15.8505    | 23.27075   | 36.46219   | 18.96527   | 20.37769 |
| CUST_56329_Pt429010886 | M13509  | 0.042665748 | 18     | 3     |        |                                                             |                                       |                                | 57.29886   | 18.00796   | 72.15825   | 73.84495   | 82.54419   | 76.76723   | 51.6582    | 68.64759   | 59.02352   | 54.66218   | 68.50963   | 65.56898   | 68.04883   | 65.56898   | 68.04883   | 65.56898   | 68.04883   | 65.56898   | 68.04883   | 65.56898   | 68.04883   | 65.56898   | 68.04883   | 65.56898   | 68.04883   | 65.56898   | 68.04883   |          |
| CUST_33145_Pt429010886 | M616    | 0.042665748 | 18     | 3     |        | 321459544 hypothetical protein DAPPUA2                      | Metabolic process                     |                                | 5.19E-60   | 547.0285   | 105.904    | 712.6985   | 563.6439   | 157.3597   | 448.6833   | 158.8642   | 191.9740   | 925.0084   | 105.904    | 712.6985   | 563.6439   | 157.3597   | 448.6833   | 158.8642   | 191.9740   | 925.0084   | 105.904    | 712.6985   | 563.6439   | 157.3597   | 448.6833   | 158.8642   | 191.9740   | 925.0084   | 105.904    | 712.6985 |
| CUST_24059_Pt429010886 | N49941  | 0.042665748 | 18     | 3     |        |                                                             |                                       |                                | 19.19457   | 12.54285   | 19.09216   | 11.23373   | 13.2886    | 15.5019    | 21.68924   | 11.20772   | 15.4862    | 27.68187   | 19.19457   | 12.54285   | 19.09216   | 11.23373   | 13.2886    | 15.5019    | 21.68924   | 11.20772   | 15.4862    | 27.68187   | 19.19457   | 12.54285   | 19.09216   | 11.23373   | 13.2886    | 15.5019    | 21.68924   | 11.20772 |
| CUST_13187_Pt429010886 | N3839   | 0.042665748 | 18     | 3     |        | 290172371 putative elcine 1 [Rimicaris op                   | Proteolysis                           |                                | 0.00001556 | 8.00001556 | 8.00001556 | 8.00001556 | 8.00001556 | 8.00001556 | 8.00001556 | 8.00001556 | 8.00001556 | 8.00001556 | 8.00001556 | 8.00001556 | 8.00001556 | 8.00001556 | 8.00001556 | 8.00001556 | 8.00001556 | 8.00001556 | 8.00001556 | 8.00001556 | 8.00001556 | 8.00001556 | 8.00001556 | 8.00001556 | 8.00001556 | 8.00001556 | 8.00001556 |          |
| CUST_317_Pt429010886   | N3839   | 0.042665748 | 18     | 3     |        | 290172371 putative elcine 1 [Rimicaris op                   | Proteolysis                           |                                | 0.03E-14   | 3090.222   | 50.2485    | 785.0219   | 200.9423   | 2070.738   | 1590.907   | 36.8707    | 46.85548   | 137.024    | 4          |            |            |            |            |            |            |            |            |            |            |            |            |            |            |            |            |          |

| Probe ID               | ID      | p-value     | Period | Phase | EBI ID    | Annotation                     | GO category         | Go term     | E-value  | 1        | 2        | 3        | 4        | 5        | 6        | 7        | 8         | 9        | 10       | 11       | 12       | 13       | 14       | 15       | 16       | 17       | 18       | 19       | 20        | 21       | 22       | 23       | 24       |          |          |          |          |
|------------------------|---------|-------------|--------|-------|-----------|--------------------------------|---------------------|-------------|----------|----------|----------|----------|----------|----------|----------|----------|-----------|----------|----------|----------|----------|----------|----------|----------|----------|----------|----------|----------|-----------|----------|----------|----------|----------|----------|----------|----------|----------|
| CUST_48658_Pt429010886 | M81499  | 0.043516913 | 15     | 6     |           |                                |                     |             | 30.89406 | 20.29782 | 32.73039 | 37.77999 | 34.22563 | 32.89225 | 34.20583 | 36.71405 | 44.04066  | 36.817   | 26.36289 | 32.58867 | 41.62236 | 35.5871  | 30.9114  | 33.18448 | 23.76317 | 45.26784 | 39.36134 | 35.0318  | 36.66978  | 45.28289 | 42.71301 | 40.19489 | 39.20049 | 39.44209 | 1.814717 |          |          |
| CUST_33992_Pt429010886 | M81448  | 0.043529751 | 21     | 0     |           |                                |                     |             | 54.66763 | 63.85058 | 30.05992 | 33.6811  | 45.3971  | 62.66376 | 36.30672 | 40.11539 | 28.95229  | 22.68453 | 24.26872 | 26.21426 | 12.60992 | 39.5247  | 13.63196 | 48.02819 | 49.83465 | 62.338   | 39.60455 | 78.48224 | 31.85501  | 40.26043 | 31.90249 | 29.71228 | 17.28516 | 141.2321 | 15.49444 |          |          |
| CUST_50793_Pt429010886 | M10207  | 0.043538976 | 21     | 0     |           |                                |                     |             | 4.174325 | 11.53833 | NA       | 12.5002  | 12.94612 | 11.71139 | 13.68582 | 10.44528 | 35.95309  | 8.649763 | NA       | 6.871633 | 14.63987 | NA       | 9.16401  | 68.10080 | 10.98749 | 12.3550  | 5.289447 | 3.186292 | 4.849947  | 6.815371 | 8.859241 | 10.85999 | 12.72789 | 7.2605   | 14.96681 |          |          |
| CUST_7111_Pt429010886  | N2959   | 0.043567096 | 21     | 0     |           |                                |                     |             | 118.2919 | 4.875258 | 14.51532 | 14.51532 | 16.55219 | 119.4807 | 20.7519  | NA       | 16.6258   | 16.3854  | 26.93807 | 96.16386 | 120.097  | 716.1458 | 47.52502 | 254.924  | 409.7628 | 199.0408 | 261.1047 | 254.924  | 14.51532  | 14.51532 | 14.51532 | 14.51532 | 14.51532 | 14.51532 | 14.51532 |          |          |
| CUST_6404_Pt429010886  | M71163  | 0.043558182 | 21     | 0     |           |                                |                     |             | 40.25099 | 10.14609 | 67.02911 | 49.89252 | 32.44579 | 47.88312 | 44.6631  | 42.5482  | 30.21523  | 33.52013 | 32.98452 | 50.8037  | 37.40246 | 56.99251 | 43.38852 | 54.43474 | 34.54667 | 63.91561 | 39.54727 | 44.65936 | 64.39267  | 52.6501  | 61.0397  | 61.64109 | 45.8048  | 30.5615  |          |          |          |
| CUST_4382_Pt429010886  | N20038  | 0.043558182 | 24     | 15    | 32164750  | hypothetical protein DAPPUORA  |                     | 0.000000696 | 263.826  | 324.044  | 345.356  | 245.754  | 211.973  | 207.127  | 244.663  | 261.39   | 235.648   | 309.132  | 280.457  | 289.307  | 388.211  | 243.1406 | 260.137  | 338.248  | 51.2506  | 400.7915 | 434.5642 | 323.204  | 318.628   | 510.126  | 291.365  | 273.691  | 401.978  | 319.334  | 267.739  | 40.1465  |          |
| CUST_14672_Pt429010886 | N33268  | 0.043612863 | 21     | 0     |           |                                |                     |             | 99.03286 | 36.87147 | 72.06126 | 51.2222  | 46.99801 | 47.18014 | 32.3579  | 24.70687 | 33.09951  | 29.04471 | 41.73602 | 46.5602  | 28.05953 | 19.93441 | 46.2588  | 44.95356 | 40.59516 | 52.06686 | 37.7     | 69.6224  | 19.6649   | 69.23652 | 48.18114 | 63.92344 | 42.37912 | 61.45522 | 20.13304 | 15.8833  | 21.33758 |
| CUST_1229_Pt429010886  | N8937   | 0.043619888 | 21     | 0     |           |                                |                     |             | 137.7644 | 123.8331 | 118.606  | 130.1528 | 66.1963  | 59.17919 | 123.0482 | 70.01129 | 34.4933   | 73.06306 | 59.57134 | 90.05411 | 102.608  | 101.0257 | 74.97441 | 60.5275  | 20.44736 | 126.2717 | 164.4418 | 115.2367 | 121.718   | 155.4709 | 63.01324 | 112.5774 | 97.0711  | 108.171  | 118.878  |          |          |
| CUST_16372_Pt429010886 | N35699  | 0.043621634 | 24     | 3     |           |                                |                     |             | 28.864   | 9.25544  | 50.11996 | 57.2242  | 46.54974 | 17.06688 | 10.78609 | 13.94672 | 17.37771  | 26.76171 | 53.3581  | 35.56743 | 34.90109 | 13.74572 | 17.40208 | 4.732801 | NA       | 11.51199 | 12.45014 | 26.3315  | 54.99941  | 26.1     | 17.42942 | 18.36173 | 5.53628  | 18.95217 | 11.24042 |          |          |
| CUST_2711_Pt429010886  | N2959   | 0.043627096 | 21     | 0     |           |                                |                     |             | 511.9251 | 827.854  | 183.365  | 170.394  | 6.68184  | 159.4749 | 163.658  | 165.851  | 169.811   | 31.20553 | 73.19053 | 73.19053 | 73.19053 | 73.19053 | 73.19053 | 73.19053 | 73.19053 | 73.19053 | 73.19053 | 73.19053 | 73.19053  | 73.19053 | 73.19053 | 73.19053 | 73.19053 | 73.19053 | 73.19053 |          |          |
| CUST_12674_Pt429010886 | N29851  | 0.043670796 | 21     | 12    |           |                                |                     |             | 27.62537 | 35.54077 | 30.38571 | 27.29012 | 31.39486 | 28.87134 | 30.84327 | 30.94649 | 44.49549  | 55.96828 | 48.75097 | 54.87487 | 40.079   | 45.87487 | 40.079   | 45.87487 | 40.079   | 45.87487 | 40.079   | 45.87487 | 40.079    | 45.87487 | 40.079   | 45.87487 | 40.079   | 45.87487 | 40.079   |          |          |
| CUST_2050_Pt429010886  | N11420  | 0.043693838 | 21     | 0     |           |                                |                     |             | 1.96E-22 | 17.89218 | 19.5531  | 15.89718 | 14.39302 | 12.14037 | 13.11742 | 17.68674 | 16.33469  | 14.38714 | 17.7062  | 12.82186 | 12.9749  | 16.868   | 13.97328 | 14.29049 | 16.40094 | 22.90485 | 195.1028 | 16.37    | 140.178   | 158.265  | 126.937  | 155.4719 | 133.943  | 150.565  | 134.874  | 153.189  |          |
| CUST_8180_Pt429010886  | N26259  | 0.043693838 | 24     | 19    | 71067009  | TFPI, info: BTP/PCD and Keldch | Ribosome biogenesis |             | 4.49E-32 | 11.21915 | 17.9523  | 18.84706 | 7.304174 | 6.73927  | 13.5943  | 18.24319 | 18.94246  | 13.08194 | 12.87295 | 5.290159 | 11.859   | 17.9133  | 13.25493 | 13.78304 | 20.7169  | 16.64745 | 12.71903 | 17.00862 | 18.25109  | 10.5835  | 13.89931 | 12.18717 | 10.51573 | 16.5401  | 15.8437  | 17.17004 |          |
| CUST_32348_Pt429010886 | M3899   | 0.043705721 | 24     | 18    | 528501428 | PREDICTED: transcriptional adp |                     | 4.79E-58    | 51.74535 | 61.8341  | 74.5359  | 44.2224  | 41.48089 | 38.50846 | 43.79783 | 48.34401 | 60.718107 | 50.50712 | 45.45892 | 46.43588 | 44.95356 | 40.59516 | 52.06686 | 37.7     | 69.6224  | 19.6649  | 69.23652 | 48.18114 | 63.92344  | 42.37912 | 61.45522 | 20.13304 | 15.8833  | 21.33758 |          |          |          |
| CUST_50931_Pt429010886 | M114928 | 0.043717272 | 24     | 3     |           |                                |                     |             | 22.25497 | 61.135   | 2826.773 | 45.7768  | 187.276  | 107.877  | 253.427  | 40.1797  | 288.7     | 99.997   | 2283.014 | 1978.294 | 259.179  | 466.5703 | 328.199  | 3924.629 | 470.698  | 263.6846 | 342.157  | 288.203  | 349.822   | 433.655  | 284.045  | 284.045  | 40.7242  | 47.42    |          |          |          |
| CUST_42076_Pt429010886 | M19377  | 0.043717272 | 21     | 0     |           |                                |                     |             | 129.42   | 129.42   | 129.42   | 129.42   | 129.42   | 129.42   | 129.42   | 129.42   | 129.42    | 129.42   | 129.42   | 129.42   | 129.42   | 129.42   | 129.42   | 129.42   | 129.42   | 129.42   | 129.42   | 129.42   | 129.42    | 129.42   | 129.42   | 129.42   | 129.42   | 129.42   | 129.42   |          |          |
| CUST_3573_Pt429010886  | N14791  | 0.043717272 | 21     | 0     |           |                                |                     |             | 340.327  | 186.13   | 329.015  | 264.807  | 280.0046 | 20.3198  | 22.127   | 19.47105 | 20.536    | 238.2083 | 152.9638 | 157.5397 | 21.933   | 163.3644 | 18.7707  | 146.7658 | 160.7833 | 156.8658 | 17.90078 | 146.129  | 196.132   | 284.846  | 108.2994 | 226.781  | 137.1475 | 136.125  | 178.393  |          |          |
| CUST_3573_Pt429010886  | N14791  | 0.043717272 | 21     | 0     |           |                                |                     |             | 79.93757 | 118.166  | 92.8706  | 51.2586  | 67.02726 | 58.2199  | 67.9004  | 106.666  | 103.715   | 79.5343  | 90.61127 | 93.93436 | 21.893   | 84.4658  | 88.1707  | 125.983  | 120.4803 | 132.1609 | 131.9063 | 110.8467 | 110.142   | 190.978  | 168.0294 | 138.1524 | 107.17   | 138.3242 | 112.11   |          |          |
| CUST_3573_Pt429010886  | N14791  | 0.043717272 | 21     | 0     |           |                                |                     |             | 93.93757 | 118.166  | 92.8706  | 51.2586  | 67.02726 | 58.2199  | 67.9004  | 106.666  | 103.715   | 79.5343  | 90.61127 | 93.93436 | 21.893   | 84.4658  | 88.1707  | 125.983  | 120.4803 | 132.1609 | 131.9063 | 110.8467 | 110.142   | 190.978  | 168.0294 | 138.1524 | 107.17   | 138.3242 | 112.11   |          |          |
| CUST_3573_Pt429010886  | N14791  | 0.043717272 | 21     | 0     |           |                                |                     |             | 93.93757 | 118.166  | 92.8706  | 51.2586  | 67.02726 | 58.2199  | 67.9004  | 106.666  | 103.715   | 79.5343  | 90.61127 | 93.93436 | 21.893   | 84.4658  | 88.1707  | 125.983  | 120.4803 | 132.1609 | 131.9063 | 110.8467 | 110.142   | 190.978  | 168.0294 | 138.1524 | 107.17   | 138.3242 | 112.11   |          |          |
| CUST_3573_Pt429010886  | N14791  | 0.043717272 | 21     | 0     |           |                                |                     |             | 93.93757 | 118.166  | 92.8706  | 51.2586  | 67.02726 | 58.2199  | 67.9004  | 106.666  | 103.715   | 79.5343  | 90.61127 | 93.93436 | 21.893   | 84.4658  | 88.1707  | 125.983  | 120.4803 | 132.1609 | 131.9063 | 110.8467 | 110.142   | 190.978  | 168.0294 | 138.1524 | 107.17   | 138.3242 | 112.11   |          |          |
| CUST_3573_Pt429010886  | N14791  | 0.043717272 | 21     | 0     |           |                                |                     |             | 93.93757 | 118.166  | 92.8706  | 51.2586  | 67.02726 | 58.2199  | 67.9004  | 106.666  | 103.715   | 79.5343  | 90.61127 | 93.93436 | 21.893   | 84.4658  | 88.1707  | 125.983  | 120.4803 | 132.1609 | 131.9063 | 110.8467 | 110.142   | 190.978  | 168.0294 | 138.1524 | 107.17   | 138.3242 | 112.11   |          |          |
| CUST_3573_Pt429010886  | N14791  | 0.043717272 | 21     | 0     |           |                                |                     |             | 93.93757 | 118.166  | 92.8706  | 51.2586  | 67.02726 | 58.2199  | 67.9004  | 106.666  | 103.715   | 79.5343  | 90.61127 | 93.93436 | 21.893   | 84.4658  | 88.1707  | 125.983  | 120.4803 | 132.1609 | 131.9063 | 110.8467 | 110.142   | 190.978  | 168.0294 | 138.1524 | 107.17   | 138.3242 | 112.11   |          |          |
| CUST_3573_Pt429010886  | N14791  | 0.043717272 | 21     | 0     |           |                                |                     |             | 93.93757 | 118.166  | 92.8706  | 51.2586  | 67.02726 | 58.2199  | 67.9004  | 106.666  | 103.715   | 79.5343  | 90.61127 | 93.93436 | 21.893   | 84.4658  | 88.1707  | 125.983  | 120.4803 | 132.1609 | 131.9063 | 110.8467 | 110.142   | 190.978  | 168.0294 | 138.1524 | 107.17   | 138.3242 | 112.11   |          |          |
| CUST_3573_Pt429010886  | N14791  | 0.043717272 | 21     | 0     |           |                                |                     |             | 93.93757 | 118.166  | 92.8706  | 51.2586  | 67.02726 | 58.2199  | 67.9004  | 106.666  | 103.715   | 79.5343  | 90.61127 | 93.93436 | 21.893   | 84.4658  | 88.1707  | 125.983  | 120.4803 | 132.1609 | 131.9063 | 110.8467 | 110.142   | 190.978  | 168.0294 | 138.1524 | 107.17   | 138.3242 | 112.11   |          |          |
| CUST_3573_Pt429010886  | N14791  | 0.043717272 | 21     | 0     |           |                                |                     |             | 93.93757 | 118.166  | 92.8706  | 51.2586  | 67.02726 | 58.2199  | 67.9004  | 106.666  | 103.715   | 79.5343  | 90.61127 | 93.93436 | 21.893   | 84.4658  | 88.1707  | 125.983  | 120.4803 | 132.1609 | 131.9063 | 110.8467 | 110.142   | 190.978  | 168.0294 | 138.1524 | 107.17   | 138.3242 | 112.11   |          |          |
| CUST_3573_Pt429010886  | N14791  | 0.043717272 | 21     | 0     |           |                                |                     |             | 93.93757 | 118.166  | 92.8706  | 51.2586  | 67.02726 | 58.2199  | 67.9004  | 106.666  | 103.715   | 79.5343  | 90.61127 | 93.93436 | 21.893   | 84.4658  | 88.1707  | 125.983  | 120.4803 | 132.1609 | 131.9063 | 110.8467 | 110.142   | 190.978  | 168.0294 | 138.1524 | 107.17   | 138.3242 | 112.11   |          |          |
| CUST_3573_Pt429010886  | N14791  | 0.043717272 | 21     | 0     |           |                                |                     |             | 93.93757 | 118.166  | 92.8706  | 51.2586  | 67.02726 | 58.2199  | 67.9004  | 106.666  | 103.715   | 79.5343  | 90.61127 | 93.93436 | 21.893   | 84.4658  | 88.1707  | 125.983  | 120.4803 | 132.1609 | 131.9063 | 110.8467 | 110.142   | 190.978  | 168.0294 | 138.1524 | 107.17   | 138.3242 | 112.11   |          |          |
| CUST_3573_Pt429010886  | N14791  | 0.043717272 | 21     | 0     |           |                                |                     |             | 93.93757 | 118.166  | 92.8706  | 51.2586  | 67.02726 | 58.2199  | 67.9004  | 106.666  | 103.715   | 79.5343  | 90.61127 | 93.93436 | 21.893   | 84.4658  | 88.1707  | 125.983  | 120.4803 | 132.1609 | 131.9063 | 110.8467 | 110.142</ |          |          |          |          |          |          |          |          |

| Probe ID              | ID     | p-value     | Period | Phase | EBI ID | Annotation | GO category | Go term | E-value | 1         | 2        | 3        | 4        | 5        | 6        | 7        | 8        | 9        | 10       | 11       | 12       | 13       | 14       | 15       | 16       | 17        | 18       | 19       | 20       | 21       | 22       | 23       | 24       |          |           |          |          |
|-----------------------|--------|-------------|--------|-------|--------|------------|-------------|---------|---------|-----------|----------|----------|----------|----------|----------|----------|----------|----------|----------|----------|----------|----------|----------|----------|----------|-----------|----------|----------|----------|----------|----------|----------|----------|----------|-----------|----------|----------|
| CUST_17902_P429100886 | N38799 | 0.044645816 | 21     | 3     |        |            |             |         |         | 21.4533   | 22.3275  | 20.13887 | 10.35581 | 24.64222 | 16.23741 | 33.73205 | 10.53608 | 20.07037 | 24.94507 | 11.33713 | 21.9708  | 17.96997 | 16.5389  | 18.4638  | 16.56836 | 15.29246  | 16.98717 | 21.21056 | 19.34106 | 21.58319 | 29.00909 | 19.43327 | 24.62618 | 33.27664 | 20.39286  | 19.90276 |          |
| CUST_4431_P429100886  | N16740 | 0.044667086 | 12     | 6     |        |            |             |         |         | 9.57E-10  | 11.2206  | NA       | 14.16167 | NA       | 12.86873 | 35.6056  | NA       | 26.88367 | 44.17172 | 27.46681 | NA       | 13.82118 | 41.56856 | 15.88593 | 33.93104 | NA        | 31.41002 | 43.72104 | 62.52002 | 1425.394 | 72.02614 | NA       | 56.97991 | 158.2614 | 53.86617  | 17.12568 |          |
| CUST_38975_P429100886 | N32873 | 0.044691453 | 24     | 6     |        |            |             |         |         | 33.82382  | 33.1607  | 40.2126  | 51.44117 | 32.40814 | 37.62384 | 72.4004  | 10.10339 | 61.80424 | 45.76721 | 24.06986 | 34.13078 | 30.9406  | 10.01268 | 30.80369 | 143.9499 | 153.0882  | 20.7218  | 31.85591 | 31.79774 | 87.57563 | 52.6725  | 72.71469 | 35.95603 | 21.89139 | 53.92132  | 13.9868  |          |
| CUST_41733_P429100886 | N14910 | 0.044703553 | 21     | 3     |        |            |             |         |         | 24.06897  | 14.1723  | 12.38325 | 74.76519 | 83.67761 | 77.76407 | 16.7165  | 17.0885  | 13.59138 | 14.70933 | 87.86531 | 15.90823 | 18.7651  | 38.54866 | 16.07074 | 10.99101 | 14.07114  | 16.55317 | 15.57038 | 12.99127 | 12.42426 | 20.05918 | 97.91205 | 48.11553 | 337.4621 | 22.32132  |          |          |
| CUST_42784_P429100886 | N35981 | 0.044718855 | 18     | 3     |        |            |             |         |         | 25.7596   | 8.74022  | 20.31353 | 33.88265 | 47.4111  | 43.33402 | 49.82326 | 18.0594  | 14.9073  | 32.0575  | 71.2011  | 42.43124 | 30.6257  | 37.7602  | 46.0354  | 2.82881  | 12.33332  | 5.67819  | 62.3254  | 97.0086  | 17.2201  | 364.3837 | 40.48737 | 51.54739 | 324.5096 | 321.31139 |          |          |
| CUST_47574_P429100886 | N17475 | 0.044721989 | 15     | 3     |        |            |             |         |         | 21.65157  | 27.9023  | 31.14331 | 10.3156  | 8.880632 | 13.00372 | 15.51954 | 13.08939 | 16.34312 | 11.58271 | 11.58271 | 11.58271 | 11.58271 | 11.58271 | 11.58271 | 11.58271 | 11.58271  | 11.58271 | 11.58271 | 11.58271 | 11.58271 | 11.58271 | 11.58271 | 11.58271 | 11.58271 | 11.58271  |          |          |
| CUST_50658_P429100886 | N90299 | 0.044721989 | 18     | 3     |        |            |             |         |         | 233.498   | 121.1643 | 289.0575 | 309.5645 | 168.3855 | 297.6356 | 104.7454 | 128.5824 | 126.5898 | 199.3483 | 186.792  | 156.412  | 192.8532 | 114.277  | 198.3111 | 130.3596 | 158.518   | 135.927  | 149.7899 | 129.9419 | 156.394  | 342.927  | 222.7682 | 350.7074 | 128.5165 | 158.9424  | 196.526  |          |
| CUST_9821_P429100886  | N25254 | 0.044722827 | 24     | 3     |        |            |             |         |         | 3.43E-72  | 95.26274 | 112.5405 | 72.19272 | 99.88604 | 215.9462 | 70.8083  | 85.4102  | 125.842  | 91.50373 | 74.93498 | 148.641  | 104.0048 | 90.9383  | 141.1475 | 137.7481 | 93.3967   | 139.1998 | 94.83879 | 77.50089 | 17.23242 | 66.21459 | 55.50616 | 100.41   | 53.10666 | 67.5437   | 19.7806  | 56.9526  |
| CUST_38404_P429100886 | M26287 | 0.044735553 | 24     | 6     |        |            |             |         |         | 19.8132   | 10.0070  | 4467.089 | 2885.204 | 182.2535 | 64.2949  | 5284.133 | 531.5758 | 110.524  | 430.814  | 1829.191 | 2216.187 | 402.731  | 383.125  | 175.515  | 5162.169 | 87.93621  | 971.634  | 71.11995 | 545.358  | 950.9077 | 2753.439 | 3675.29  | 346.904  | 5769.427 | 3368.791  | 7021.693 |          |
| CUST_41544_P429100886 | N17491 | 0.044735553 | 21     | 3     |        |            |             |         |         | 107.721   | 181.1726 | 10987.48 | 10795.65 | 7497.741 | 54.1715  | 84.5277  | 10.0136  | 15.0816  | 12.7247  | NA       | 14.07333 | 14.07333 | 14.07333 | 14.07333 | 14.07333 | 14.07333  | 14.07333 | 14.07333 | 14.07333 | 14.07333 | 14.07333 | 14.07333 | 14.07333 | 14.07333 | 14.07333  | 14.07333 |          |
| CUST_5282_P429100886  | N69409 | 0.044735553 | 18     | 3     |        |            |             |         |         | 2.91E-66  | 9980.233 | 13550.72 | 9753.749 | 8054.69  | 6276.978 | 7531.236 | 36.882   | 112.063  | 91.6164  | 112.063  | 91.6164  | 112.063  | 91.6164  | 112.063  | 91.6164  | 112.063   | 91.6164  | 112.063  | 91.6164  | 112.063  | 91.6164  | 112.063  | 91.6164  | 112.063  | 91.6164   | 112.063  | 91.6164  |
| CUST_6527_P429100886  | N20217 | 0.044735553 | 24     | 12    |        |            |             |         |         | 193.547   | 95.16402 | 174.7305 | 201.236  | 80.7139  | 167.8527 | 9067.463 | 623.3119 | 448.6833 | 723.622  | 3297.935 | 1247.935 | 788.6649 | 234.5461 | 13.2211  | 126.058  | 14.67024  | 12.80783 | 419.0519 | 229.7888 | 27.9477  | 204.5264 | 184.0048 | 197.8794 | 174.5234 | 129.2127  | 30.3066  |          |
| CUST_27718_P429100886 | N55473 | 0.044735553 | 24     | 12    |        |            |             |         |         | 65.08782  | 75.46497 | 81.51736 | 76.79922 | 74.01825 | 73.11579 | 79.38788 | 89.65818 | 72.42407 | 80.09968 | 71.3958  | 80.76921 | 112.6222 | 131.1039 | 114.561  | 96.86025 | 107.2724  | 83.62172 | 69.2209  | 84.1322  | 101.2925 | 88.1009  | 116.8623 | 95.5451  | 16.1275  | 101.326   | 38.3668  |          |
| CUST_67564_P429100886 | N20569 | 0.044765611 | 24     | 12    |        |            |             |         |         | 6.98E-112 | 95.9356  | 71.5864  | 161.7701 | 119.6201 | 172.9496 | 132.9754 | 94.06019 | 138.1444 | 114.1632 | 82.80077 | 144.7796 | 67.90901 | 243.9437 | 162.1496 | 145.9591 | 105.353   | 101.0467 | 141.6611 | 195.9604 | 204.8735 | 173.1377 | 137.7137 | 328.1119 | 468.3869 | 115.2656  | 18.889   |          |
| CUST_16457_P429100886 | N23922 | 0.044769025 | 24     | 12    |        |            |             |         |         | 21.85249  | 27.31739 | 24.80368 | 166.1475 | 20.70488 | 31.12088 | 26.6745  | 13.14881 | 17.68077 | 37.94596 | 144.7074 | 23.81043 | 20.97397 | 9.787245 | 14.57035 | 25.20579 | 18.83681  | 21.43051 | 24.27362 | 16.80575 | 9.858804 | 39.24334 | 21.3304  | 30.02336 | 41.3149  | 23.64075  | 19.15439 |          |
| CUST_41733_P429100886 | N14910 | 0.044735553 | 21     | 3     |        |            |             |         |         | 54.74825  | 48.74827 | 20.9184  | 22.67427 | NA       | 21.47115 | 84.5277  | 10.0136  | 15.0816  | 12.7247  | NA       | 14.07333 | 14.07333 | 14.07333 | 14.07333 | 14.07333 | 14.07333  | 14.07333 | 14.07333 | 14.07333 | 14.07333 | 14.07333 | 14.07333 | 14.07333 | 14.07333 | 14.07333  | 14.07333 |          |
| CUST_45356_P429100886 | N68858 | 0.044811857 | 15     | 0     |        |            |             |         |         | 23.52214  | 20.7271  | 17.7903  | 9.408973 | 17.31771 | 30.2361  | 14.8008  | 16.35396 | 12.26538 | 24.10826 | 18.01822 | 25.30627 | 23.2473  | 13.79213 | 28.85892 | 27.7221  | 22.43.976 | 28.0805  | 23.68893 | 17.34867 | 24.35366 | 18.86713 | 13.0035  | 14.71235 | 31.7812  | 14.67313  | 28.0761  |          |
| CUST_444_P429100886   | N5213  | 0.044811857 | 15     | 9     |        |            |             |         |         | 216.039   | 175.2065 | 182.3885 | 128.3075 | 112.3846 | 104.5901 | 218.6001 | 218.6001 | 218.6001 | 218.6001 | 218.6001 | 218.6001 | 218.6001 | 218.6001 | 218.6001 | 218.6001 | 218.6001  | 218.6001 | 218.6001 | 218.6001 | 218.6001 | 218.6001 | 218.6001 | 218.6001 | 218.6001 | 218.6001  | 218.6001 |          |
| CUST_3047_P429100886  | N14705 | 0.044813474 | 24     | 18    |        |            |             |         |         | 132.1366  | 30.15984 | 140.876  | 25.899   | 209.5938 | 7.18431  | 165.1857 | 127.3592 | 298.8084 | 11.59026 | 12.32466 | 10.51064 | 10.62276 | 16.16824 | 60.61242 | 297.7548 | 60.134    | 33.1006  | 30.942   | 22.24201 | 20.251   | 242.2401 | 20.251   | 242.2401 | 20.251   | 242.2401  |          |          |
| CUST_48286_P429100886 | N73669 | 0.044818262 | 15     | 12    |        |            |             |         |         | 62.83512  | 35.70122 | 55.98105 | 46.2357  | 31.19486 | 48.2667  | 40.9951  | 37.22647 | 45.9767  | 74.7465  | 50.56209 | 95.90731 | 80.05281 | 43.62323 | 77.808   | 76.91277 | 30.14227  | 44.9365  | 44.06952 | 26.16413 | 44.25351 | 49.96979 | 33.83846 | 62.25272 | 65.14299 | 30.26428  | 49.84814 |          |
| CUST_41544_P429100886 | N17491 | 0.044735553 | 21     | 3     |        |            |             |         |         | 5.521695  | 22.89867 | 35.7991  | NA       | NA       | 5.99857  | 20.62243 | 24.70669 | 35.2621  | 10.35301 | NA       | 7.359305 | 7.46458  | 7.867001 | 12.55107 | 9.40062  | NA        | 12.20021 | 51.81869 | 72.5786  | 52.44767 | 43.12031 | 9.537706 | 39.93436 | 15.23659 | 45.97159  |          |          |
| CUST_5304_P429100886  | N97956 | 0.044824008 | 24     | 0     |        |            |             |         |         | 14.96804  | 26.57765 | 32.6579  | 28.7956  | 18.93459 | 14.83032 | 14.70595 | 14.70595 | 14.70595 | 14.70595 | 14.70595 | 14.70595 | 14.70595 | 14.70595 | 14.70595 | 14.70595 | 14.70595  | 14.70595 | 14.70595 | 14.70595 | 14.70595 | 14.70595 | 14.70595 | 14.70595 | 14.70595 | 14.70595  | 14.70595 |          |
| CUST_1753_P429100886  | N10610 | 0.044824008 | 24     | 0     |        |            |             |         |         | 9.73E-29  | 35.40841 | 31.04269 | 31.88585 | 32.44868 | 35.28358 | 28.3528  | 43.92043 | 13.25025 | 26.31789 | 29.25728 | 28.73586 | 24.1211  | 25.82769 | 28.99304 | 21.72028 | 47.83627  | 36.85195 | 16.30712 | 34.28997 | 31.04885 | 91.12101 | 25.45431 | 28.7297  | 20.44056 | 37.8045   | 40.6802  | 29.74055 |
| CUST_51382_P429100886 | M93331 | 0.044832657 | 18     | 15    |        |            |             |         |         | 13.65032  | 11.84234 | 13.96585 | 16.7655  | 3.445979 | 13.20158 | 15.67537 | 11.60345 | 14.9267  | 11.84344 | 6.19314  | 9.622741 | 14.27815 | 13.57805 | 16.1189  | 14.93477 | 19.5898   | 21.8393  | 11.24535 | 8.65454  | 13.20299 | 5.79907  | 7.789818 | 8.196534 | 10.62262 | 16.30062  | 10.62571 |          |
| CUST_32301_P429100886 | M3741  | 0.044840109 | 24     | 15    |        |            |             |         |         | 1.97E-64  | 19.28668 | 32.516   | 29.51262 | 16.7585  | 25.5086  | 24.30358 | 15.55029 | 19.62692 | 32.95522 | 34.08118 | 27.49895 | 23.2144  | 25.61964 | 26.90525 | 22.1479  | 43.93749  | 32.82562 | 35.88985 | 39.2638  | 27.00028 | 27.45852 | 36.38725 | 29.65224 | 33.60276 | 30.14473  | 43.02673 |          |
| CUST_31072_P429100886 | M649   | 0.044843666 | 18     | 6     |        |            |             |         |         | 1.41E-147 | 149.1772 | 314.7154 | 178.6979 | 155.5241 | 137.0769 | 126.2564 | 247.3301 | 233.7667 | 211.588  | 200.1658 | 160.388  | 190.0624 | 173.6159 | 175.9101 | 145.6512 | 290.8068  | 32.0487  | 326.0293 | 202.6489 | 204.4319 | 148.6469 | 195.447  | 175.0848 | 100.2979 | 203.0356  | 188.839  |          |
| CUST_41733_P429100886 | N14910 | 0.044735553 | 21     | 3     |        |            |             |         |         | 24.06897  | 14.1723  | 12.38325 | 74.76519 | 83.67761 | 77.76407 | 16.7165  | 17.0885  | 13.59138 | 14.70933 | 87.86531 | 15.90823 | 18.7651  | 38.54866 | 16.07074 | 10.99101 | 14.07114  | 16.55317 | 15.57038 | 12.99127 | 12.42426 | 20.05918 | 97.91205 | 48.11553 | 337.4621 | 22.32132  |          |          |
| CUST_8122_P429100886  | N22554 | 0.044858065 | 18     | 6     |        |            |             |         |         | 228.8663  | 60.3108  | 33.5586  | 18.3371  | 307.6081 | 149.1256 | 40.7001  | 53.9591  | 64.7824  | 70.445   | 21.987   | 16.398   | 73.6694  | 70.148   | 24.275   | 20.317   | 33.14929  | 34.6618  | 20.317   | 33.14929 | 34.6618  | 20.317   | 33.14929 | 34.6618  | 20.317   | 33.14929  | 34.6618  |          |
| CUST_7819_P429100886  | N21217 | 0.044862224 | 12     | 9     |        |            |             |         |         | 6.510267  | 8.63517  | 17.80989 | 202.5815 | 34.79137 | 51.56856 | 18.45499 | 55.08315 | 21.2718  | 30.7477  | 73.9268  | 68.0294  | 124.614  | 10.7454  | 14.0177  | NA       | 4.788     |          |          |          |          |          |          |          |          |           |          |          |

[illegible]

| Probe ID               | ID      | p-value     | Period | Phase | EBI ID     | Annotation                       | GO category                           | Go term     | E-value   | 0        | 1        | 2        | 3         | 4        | 5        | 6        | 7        | 8        | 9        | 10       | 11       | 12       | 13       | 14       | 15       | 16       | 17       | 18       | 19       | 20       | 21       | 22       | 23       | 24       | 25       |          |
|------------------------|---------|-------------|--------|-------|------------|----------------------------------|---------------------------------------|-------------|-----------|----------|----------|----------|-----------|----------|----------|----------|----------|----------|----------|----------|----------|----------|----------|----------|----------|----------|----------|----------|----------|----------|----------|----------|----------|----------|----------|----------|
| CUST_1779_Pt429010886  | N10682  | 0.046727974 | 24     | 21    |            |                                  |                                       |             | 240.7581  | 309.9338 | 323.865  | 286.1798 | 219.702   | 297.6767 | 322.5513 | 268.9804 | 261.8228 | 431.1432 | 242.474  | 318.4002 | 336.5214 | 234.7388 | 236.013  | 465.024  | 236.8696 | 353.6905 | 387.4512 | 317.1978 | 349.8278 | 529.0583 | 464.7851 | 425.4449 | 349.9023 | 263.251  | 385.9551 |          |
| CUST_3322_Pt429010886  | N14262  | 0.046727974 | 24     | 21    |            |                                  |                                       |             | 27.0245   | 29.9433  | 39.55139 | 40.21667 | 22.87315  | 29.7641  | 24.46775 | 16.67933 | 24.42377 | 31.8633  | 27.75    | 23.43945 | 49.24543 | 15.55124 | 29.3005  | 42.9937  | 25.7879  | 32.7574  | 49.51361 | 21.2669  | 31.16363 | 46.02213 | 34.79714 | 34.04257 | 47.55101 | 26.45917 | 39.02662 |          |
| CUST_3330_Pt429010886  | N14281  | 0.047627974 | 24     | 21    |            |                                  |                                       |             | 277.6692  | 287.6916 | 336.7218 | 303.4267 | 239.8975  | 237.2974 | 238.0204 | 197.2974 | 251.1902 | 297.8825 | 281.1928 | 241.364  | 333.2958 | 223.7206 | 413.6009 | 351.5996 | 293.7564 | 331.6399 | 236.6825 | 319.6329 | 236.6825 | 319.6329 | 413.6009 | 314.0313 | 289.7521 | 250.1769 | 45.72646 |          |
| CUST_34021_Pt429010886 | N12550  | 0.047627974 | 12     | 3     |            |                                  |                                       |             | 33.84021  | 13.07115 | 23.38167 | 24.42377 | 21.3436   | 22.4068  | 14.4737  | 21.3436  | 22.4068  | 14.4737  | 21.3436  | 22.4068  | 14.4737  | 21.3436  | 22.4068  | 14.4737  | 21.3436  | 22.4068  | 14.4737  | 21.3436  | 22.4068  | 14.4737  | 21.3436  | 22.4068  | 14.4737  | 21.3436  | 22.4068  |          |
| CUST_35898_Pt429010886 | N13846  | 0.047653641 | 12     | 0     |            |                                  |                                       |             | 763.8826  | 902.1504 | 326.608  | 313.6664 | 530.8409  | 437.065  | 434.9251 | 630.947  | 479.6765 | 580.061  | 597.1433 | 606.3479 | 648.8706 | 517.7643 | 606.7201 | 503.995  | 626.641  | 494.8206 | 528.1103 | 746.967  | 373.0445 | 756.8701 | 514.9905 | 700.8468 | 756.5534 | 581.654  | 794.6489 |          |
| CUST_35350_Pt429010886 | M102122 | 0.047683577 | 12     | 6     |            |                                  |                                       |             | 4.106595  | 22.0022  | 33.95966 | 46.88289 | NA        | 8.27343  | 26.24865 | 40.59042 | 58.74405 | 39.283   | 22.7276  | 61.4519  | 6.614583 | NA       | NA       | 4.944352 | 7.804205 | 7.897797 | NA       | 16.96814 | 23.74754 | NA       | 11.3602  | 12.37796 | 5.856234 | NA       |          |          |
| CUST_14629_Pt429010886 | N33199  | 0.047683727 | 21     | 15    | 3450494495 | PREDICTED: protein FAM49H-like   |                                       |             | 2.08E-42  | 20.86102 | 33.9779  | 29.57804 | 23.6731   | 16.03696 | 32.41885 | 15.9512  | 14.93713 | 21.82274 | 12.4535  | 10.75027 | 20.67881 | 20.7055  | 25.65667 | 31.0164  | 40.73428 | 25.11323 | 27.10146 | 49.00584 | 13.9779  | 29.18122 | 26.61853 | 27.00269 | 25.81706 | 23.97222 | 20.9611  | 27.26634 |
| CUST_50158_Pt429010886 | M88872  | 0.047735136 | 15     | 3     |            |                                  |                                       |             | NA        | 8.416104 | NA       | 7.630778 | 7.728021  | NA       | NA       | 13.40595 | NA       | 5.158646 | 4.165894 | 4.886621 | 6.727557 | NA       | 7.828751 | 14.00531 | 6.89944  | 4.97673  | 5.864235 | 5.203747 | 8.488891 | 7.294495 | 10.50461 | 9.528415 | 6.815616 | 4.825812 | 3.571782 |          |
| CUST_2892_Pt429010886  | N60234  | 0.047803311 | 18     | 6     | 291236607  | PREDICTED: zinc finger protein 3 |                                       |             | 2.81E-22  | 8.685434 | 15.9946  | 14.84951 | 4.228913  | 16.29033 | NA       | 14.15703 | 12.43346 | 25.09267 | 18.37116 | 15.8505  | 18.30441 | 4.734737 | 9.432312 | 6.68462  | 10.27398 | 17.59422 | 8.14167  | 14.2408  | 13.65032 | 15.27714 | NA       | 20.61917 | 17.32449 | 14.2908  | 14.80209 | 21.46595 |
| CUST_8111_Pt429010886  | N2250   | 0.047810598 | 12     | 3     |            |                                  |                                       |             | 36.87514  | 39.81401 | 38.35367 | 40.4082  | 47.51371  | 40.2839  | 39.61156 | 38.36376 | 31.5433  | 36.54044 | 43.92787 | 47.48311 | 35.35085 | 48.09534 | 35.11007 | 45.09435 | 40.1215  | 38.2258  | 25.15875 | 16.16933 | 21.028   | 36.828   | 35.5871  | 24.5682  | 39.02679 | NA       |          |          |
| CUST_76128_Pt429010886 | N12384  | 0.047820298 | 12     | 3     |            |                                  |                                       |             | 17.61728  | 11.5746  | 72.59394 | 72.78917 | 119.2089  | 122.0363 | 101.0612 | 136.7138 | 77.00308 | 68.0004  | 68.0004  | 58.2587  | 58.2587  | 58.2587  | 58.2587  | 58.2587  | 58.2587  | 58.2587  | 58.2587  | 58.2587  | 58.2587  | 58.2587  | 58.2587  | 58.2587  | 58.2587  | 58.2587  | 58.2587  |          |
| CUST_20528_Pt429010886 | N43613  | 0.047820298 | 12     | 3     |            |                                  |                                       |             | 0.978099  | 11.88037 | 15.14996 | 13.86535 | 13.5927   | 12.7831  | 9.255882 | 12.1414  | 13.13624 | 7.23051  | 5.896106 | 10.31236 | 16.4194  | 18.14187 | 12.06381 | 15.32058 | 17.95932 | 10.7402  | 20.52286 | 13.69119 | 6.738059 | 7.903425 | 12.69158 | 9.01805  | 14.0179  | 10.63779 | 14.4625  |          |
| CUST_41864_Pt429010886 | M58736  | 0.047827036 | 21     | 15    |            |                                  |                                       |             | 82.94083  | 96.7742  | 92.83981 | 84.85059 | 73.59425  | 72.7801  | 80.37054 | 90.46029 | 97.30769 | 113.8967 | 56.90618 | 80.04562 | 15.1549  | 6.57565  | 93.8008  | 101.2008 | 95.16242 | 10.192   | 98.94639 | 75.2773  | 93.5458  | 89.9598  | 86.88214 | 87.73081 | 83.8279  | 79.4741  | 88.02181 |          |
| CUST_29034_Pt429010886 | N51669  | 0.047846607 | 18     | 9     |            |                                  |                                       |             | 14.66072  | 5.509051 | 8.536446 | 11.41084 | 8.846413  | 19.33887 | 11.67372 | 17.35359 | 40.5192  | 21.2553  | 32.2574  | 15.02105 | 25.65667 | 31.0164  | 40.73428 | 25.11323 | 27.10146 | 49.00584 | 13.9779  | 29.18122 | 26.61853 | 27.00269 | 25.81706 | 23.97222 | 20.9611  | 27.26634 |          |          |
| CUST_37357_Pt429010886 | N138382 | 0.047849151 | 24     | 3     |            |                                  |                                       |             | 19.66557  | 81.62587 | 83.5012  | 15.30631 | 81.19435  | 51.151   | 37.63076 | 580.5723 | 47.99794 | NA       | 14.407   | 142.749  | NA       | 108.708  | 20.8573  | 9.91959  | 4.57883  | 61.02607 | 224.874  | 3.919353 | NA       | 60.1166  | NA       | 48.4715  | 15.7993  |          |          |          |
| CUST_31144_Pt429010886 | N43739  | 0.047871726 | 12     | 3     |            |                                  |                                       |             | 802.7134  | 390.0801 | 81.245   | 81.245   | 22.55014  | NA       | 21.14367 | 570.0002 | 10.70004 | 31.58349 | 21.14367 | 570.0002 | 10.70004 | 31.58349 | 21.14367 | 570.0002 | 10.70004 | 31.58349 | 21.14367 | 570.0002 | 10.70004 | 31.58349 | 21.14367 | 570.0002 | 10.70004 | 31.58349 | 21.14367 | 570.0002 |
| CUST_34541_Pt429010886 | M9090   | 0.047875894 | 24     | 3     |            |                                  |                                       |             | 215.3959  | 357.296  | 349.0153 | 275.2907 | 290.1517  | 24.1034  | 29.4641  | 33.8186  | 36.2664  | 31.7361  | 33.92657 | 284.5322 | 31.8576  | 23.3403  | 281.3108 | 97.53014 | 429.5829 | 41.3393  | 394.7866 | 32.41    | 408.5869 | 32.4109  | 32.84818 | 368.3282 | 385.8674 | 336.8186 | 45.8629  |          |
| CUST_14449_Pt429010886 | N82856  | 0.047889244 | 24     | 3     |            |                                  |                                       |             | 11.05126  | 12.73565 | 18.40737 | 21.751   | 46.15443  | 24.1254  | 29.8481  | 14.94255 | 14.94255 | 20.3158  | 28.24507 | 15.78535 | 20.3158  | 28.24507 | 15.78535 | 20.3158  | 28.24507 | 15.78535 | 20.3158  | 28.24507 | 15.78535 | 20.3158  | 28.24507 | 15.78535 | 20.3158  | 28.24507 | 15.78535 |          |
| CUST_21760_Pt429010886 | N45800  | 0.047917724 | 12     | 9     |            |                                  |                                       |             | NA        | 13.1424  | 15.02762 | 17.19455 | 10.99972  | 10.7727  | 13.55938 | 12.00142 | 8.989007 | NA       | 16.6865  | 28.78071 | NA       | 4.05331  | 9.88124  | 12.0612  | 12.73726 | 3.840095 | NA       | 15.21169 | 14.06618 | 17.32043 | 29.1159  | 17.0639  | 6.79548  | 14.38486 | 17.12339 |          |
| CUST_32322_Pt429010886 | M3801   | 0.047951347 | 24     | 0     | 321468166  | hypothetical protein DAPPUORA    | Cellular amino acid metabolic process |             | 1.73E-107 | 115.8648 | 235.4574 | 231.134  | 134.7613  | 179.9258 | 199.7728 | 159.7245 | 215.3674 | 207.0776 | 157.2569 | 168.6458 | 151.5648 | 174.6338 | 197.0569 | 164.0224 | 126.862  | 253.0838 | 191.1158 | 194.0015 | 212.1849 | 204.1061 | 175.5751 | 199.8399 | 177.6012 | 213.7290 | 210.765  | 214.7161 |
| CUST_31144_Pt429010886 | N43739  | 0.047961058 | 24     | 21    |            |                                  |                                       |             | 21.01719  | 22.38002 | 27.67304 | 28.88373 | 25.07913  | 27.67304 | 28.88373 | 25.07913 | 27.67304 | 28.88373 | 25.07913 | 27.67304 | 28.88373 | 25.07913 | 27.67304 | 28.88373 | 25.07913 | 27.67304 | 28.88373 | 25.07913 | 27.67304 | 28.88373 | 25.07913 | 27.67304 | 28.88373 | 25.07913 | 27.67304 |          |
| CUST_5273_Pt429010886  | N19798  | 0.047982068 | 18     | 0     | 321477834  | hypothetical protein DAPPUORA    | Protein metabolism                    | Proteolysis | 6.48E-35  | 143.92   | 153.5452 | 185.5620 | 170.04307 | 139.3908 | 73.39823 | 96.58233 | 138.718  | 86.80055 | 81.70111 | 139.818  | 62.25472 | 84.69767 | 123.0482 | 105.4902 | 90.18377 | 168.8493 | 114.7955 | 142.7777 | 168.8493 | 114.7955 | 142.7777 | 168.8493 | 114.7955 | 142.7777 | 168.8493 |          |
| CUST_54173_Pt429010886 | N104908 | 0.047986919 | 21     | 0     |            |                                  |                                       |             | 515.4837  | 21.48961 | 652.1093 | 565.6114 | 327.8029  | 327.8029 | 327.8029 | 327.8029 | 327.8029 | 327.8029 | 327.8029 | 327.8029 | 327.8029 | 327.8029 | 327.8029 | 327.8029 | 327.8029 | 327.8029 | 327.8029 | 327.8029 | 327.8029 | 327.8029 | 327.8029 | 327.8029 | 327.8029 | 327.8029 | 327.8029 |          |
| CUST_30934_Pt429010886 | M260    | 0.048002725 | 24     | 0     |            |                                  |                                       |             | 158.7682  | 214.49   | 196.581  | 136.9653 | 120.6226  | 156.7337 | 139.2427 | 152.451  | 135.451  | 101.7856 | 145.5634 | 147.4793 | 131.9245 | 166.486  | 106.1766 | 124.004  | 233.412  | 234.1247 | 168.0725 | 203.2614 | 200.6419 | 123.5457 | 245.4129 | 202.772  | 142.8855 | 209.3429 | 200.5807 |          |
| CUST_31168_Pt429010886 | M670    | 0.048002166 | 24     | 15    |            |                                  |                                       |             | 974.36    | 1118.139 | 1114.294 | 934.3693 | 793.898   | 725.3659 | 794.9446 | 822.3417 | 852.3437 | 980.6718 | 883.4979 | 908.3858 | 107.1474 | 78.2044  | 106.734  | 119.5903 | 117.6428 | 898.0277 | 95.4596  | 83.7595  | 908.3858 | 108.78   | 129.93   | 42.5179  | 1406.008 | NA       |          |          |
| CUST_28457_Pt429010886 | N5985   | 0.048021668 | 18     | 6     |            |                                  |                                       |             | 17.93558  | 18.46116 | 17.79422 | 20.52624 | 27.79096  | 16.225   | 26.45629 | 20.3028  | 24.7772  | 16.25286 | 8.837766 | 10.53476 | 28.1177  | 16.7781  | 12.8818  | 16.42444 | 4.866057 | 14.90623 | 16.6041  | 19.9214  | 14.38494 | 21.1933  | 8.090541 | 21.46599 | 34.5893  | 18.5281  | 17.75016 |          |
| CUST_31168_Pt429010886 | N43739  | 0.048021668 | 18     | 6     |            |                                  |                                       |             | 314.7006  | 319.217  | 319.217  | 319.217  | 319.217   | 319.217  | 319.217  | 319.217  | 319.217  | 319.217  | 319.217  | 319.217  | 319.217  | 319.217  | 319.217  | 319.217  | 319.217  | 319.217  | 319.217  | 319.217  | 319.217  | 319.217  | 319.217  | 319.217  | 319.217  | 319.217  | 319.217  |          |
| CUST_31168_Pt429010886 | N43739  | 0.048021668 | 18     | 6     |            |                                  |                                       |             | 83.91692  | 108.8028 | 107.7528 | 80.3156  | 88.8238   | 76.4235  | 63.2529  | 80.3156  | 88.8238  | 76.4235  | 63.2529  | 80.3156  | 88.8238  | 76.4235  | 63.2529  | 80.3156  | 88.8238  | 76.4235  | 63.2529  | 80.3156  | 88.8238  | 76.4235  | 63.2529  | 80.3156  | 88.8238  | 76.4235  | 63.2529  | 80.3156  |
| CUST_56001_Pt429010886 | M121493 | 0.048061275 | 24     | 6     |            |                                  |                                       |             | NA        | 8.109042 | 9.203065 | 8.96095  | 9.981463  | 6.335605 | 8.317068 | 13.00979 | 11.68418 | 8.94787  | 10.61353 | 8.300487 | 10.84565 | 11.10613 | NA       | 9.005083 | 4.538944 | NA       | 6.95614  | 4.525657 | 3.062482 | 6.419453 | NA       | 6.714    |          |          |          |          |

| Probe ID                | ID      | p-value     | Period | Phase | EBI ID | Annotation | GO category                               | Go term            | E-value  | 0           | 0        | 0           | 3         | 3        | 3           | 6        | 6           | 6           | 9        | 9        | 9        | 12          | 12          | 12       | 12       | 15          | 15       | 18       | 18          | 18       | 21       | 21          | 24        | 24        | 24          |          |
|-------------------------|---------|-------------|--------|-------|--------|------------|-------------------------------------------|--------------------|----------|-------------|----------|-------------|-----------|----------|-------------|----------|-------------|-------------|----------|----------|----------|-------------|-------------|----------|----------|-------------|----------|----------|-------------|----------|----------|-------------|-----------|-----------|-------------|----------|
| CUST_47584_Pt429010886  | M76730  | 0.049277462 |        | 5     | 6      |            |                                           |                    | 136.6363 | 168.7398    | 150.0907 | 160.9745    | 105.5804  | 116.5601 | 150.2981    | 178.2736 | 154.6639    | 167.0102    | 106.8262 | 110.5717 | 137.5851 | 108.7869    | 125.123     | 123.7307 | 123.9778 | 130.0053    | 154.177  | 150.9666 | 165.8065    | 186.0781 | 174.1934 | 147.482     | 172.3438  | 139.7162  | 150.9062    |          |
| CUST_14391_Pt429010886  | N32805  | 0.049286091 |        | 15    | 12     |            |                                           |                    | 35.07134 | 40.70597    | 49.85348 | 26.69209    | 36.28088  | 34.03486 | 21.36854    | 46.57555 | 20.97815    | 31.70434    | 36.04692 | 28.47101 | 46.40366 | 47.41757    | 41.06053    | 40.52021 | 56.30846 | 46.40366    | 24.22486 | 35.44329 | 38.87018    | 25.8399  | 43.7952  | 45.29434    | 101.85499 |           |             |          |
| CUST_19229_Pt429010886  | N41219  | 0.049288337 |        | 21    | 18     |            |                                           |                    | 16.80772 | 11.52408    | 21.08201 | 14.17513    | 13.31268  | 3.736826 | 11.33397    | 5.63254  | 12.03165    | 5.039424    | 9.573755 | 15.0561  | 13.44807 | 15.44997    | 5.856234    | 12.03165 | 17.22544 | 19.20662    | 14.07152 | 25.6877  | 22.48894    | 9.01805  | 37.3337  | 17.42012    | 11.46447  | 9.388999  | 11.93346    |          |
| CUST_41400_Pt429010886  | M57648  | 0.049293278 |        | 12    | 3      |            |                                           |                    | 10.15678 | 5.09218     | 14.23051 | 16.66622    | 10.5599   | 17.0552  | 10.3429 NA  | 21.00252 | 8.04855     | 5.651239    | 10.07317 | 8.579118 | 6.517364 | 14.53618    | 11.7024     | 12.09079 | 17.69877 | 12.59391    | 6.247573 | 8.817048 | 13.2031     | 5.740467 | 5.868192 | 14.44323    | 15.2772   | 17.187878 |             |          |
| CUST_6467_Pt429010886   | N20137  | 0.049339381 |        | 21    | 15     |            |                                           |                    | 677.2359 | 1621.358    | 910.719  | 817.4569    | 977.9831  | 889.8299 | 1034.581    | 1198.216 | 1239.086    | 767.3697    | 924.3063 | 826.1267 | 788.7271 | 1261.275    | 126.7026    | 148.5898 | 1480.353 | 1403.011    | 958.1861 | 923.1653 | 1191.479    | 558.8184 | 1069.345 | 883.764     | 977.7145  | 912.5840  | 758.6703    |          |
| CUST_33395_Pt429010886  | M6775   | 0.049339173 |        | 24    | 18     |            |                                           |                    | 114.4623 | 237.7581    | 193.1768 | 118.6698    | 138.0571  | 109.4424 | 194.6568    | 176.7421 | 253.6231    | 170.9358    | 128.2402 | 155.2033 | 135.9631 | 155.5805    | 134.2975    | 191.973  | 233.5329 | 210.2979    | 187.4109 | 248.349  | 233.5329    | 161.145  | 175.6627 | 216.7919    | 158.8387  | 165.7838  | 228.7819    |          |
| CUST_16338_Pt429010886  | N30666  | 0.049339173 |        | 24    | 3      |            |                                           |                    | 292.6099 | 230.649     | 256.9518 | 408.9036    | 848.0782  | 783.39   | 176.076     | 287.632  | 137.6616    | 297.9395    | 599.3024 | 618.7694 | 328.119  | 409.2932    | 590.9592    | 144.5431 | 169.2749 | 165.0194    | 139.8095 | 268.3647 | 98.81307    | 367.9854 | 290.7575 | 364.7211    | 114.9233  | 365.0376  | 152.154     |          |
| CUST_18352_Pt429010886  | N39634  | 0.049339173 |        | 24    | 18     |            |                                           |                    | 273.0279 | 195.1305    | 210.9804 | 298.5479    | 310.4433  | 254.7629 | 340.3327    | 332.8862 | 423.238     | 609.0112    | 399.8777 | 447.5258 | 428.8369 | 386.3361    | 439.5135    | 400.4622 | 277.3623 | 503.9395    | 474.0818 | 422.6098 | 500.8894    | 393.0106 | 444.5339 | 494.3221    | 494.606   | 411.5622  | 609.2696    |          |
| CUST_50880_Pt429010886  | M91322  | 0.04941319  |        | 24    | 0      |            |                                           |                    | 18.61955 | 17.40595 NA | 8.922458 | 15.00333    | 10.13898  | 11.92884 | 11.59544    | 3.772894 | 1.709009    | 6.420562    | 11.62724 | 8.193786 | 15.16953 | 17.67403    | 11.72699    | 4.569037 | 4.51184  | 6.090071    | 8.815762 | 8.877188 | 11.58966    | 14.57803 | 12.04462 | 14.54879    | 16.82245  | 9.568881  |             |          |
| CUST_41263_Pt429010886  | M59829  | 0.049415903 |        | 12    | 0      |            |                                           |                    | 55.38305 | 48.61045    | 87.20664 | 49.01446    | 72.20517  | 43.45889 | 32.51568    | 37.84156 | 55.56014    | 47.21493    | 74.56212 | 57.69269 | 56.15422 | 48.4991     | 74.82956    | 45.9793  | 72.09362 | 59.8713     | 39.40243 | 52.75604 | 43.89532    | 78.21217 | 47.39716 | 60.24608    | 68.27308  | 54.39234  | 84.34054    |          |
| CUST_45580_Pt429010886  | M69570  | 0.049415903 |        | 12    | 0      |            |                                           |                    | 71.14732 | 65.53387    | 101.2279 | 76.90215    | 61.68316  | 66.60981 | 56.59931    | 59.59396 | 62.24693    | 73.24973    | 59.99359 | 64.07065 | 106.3248 | 55.75538    | 80.79724    | 65.11364 | 69.28931 | 69.15316    | 62.71924 | 58.42497 | 71.9236     | 86.41587 | 94.2799  | 75.06872    | 75.68382  |           |             |          |
| CUST_21663_Pt429010886  | N45615  | 0.049415903 |        | 12    | 0      |            |                                           |                    | 39.63818 | 19.71996    | 56.75829 | 31.40066    | 18.78876  | 31.12503 | 24.88406    | 23.53743 | 22.95059    | 35.78012    | 33.68871 | 34.45309 | 27.67843 | 34.04952    | 30.68899    | 42.58251 | 29.24902 | 32.03079    | 27.97412 | 16.78653 | 26.52431    | 35.95938 | 30.67349 | 37.12565    | 33.19846  | 38.23951  | 31.46629    |          |
| CUST_25521_Pt429010886  | N52565  | 0.049415903 |        | 12    | 0      |            |                                           |                    | 32.56414 | 38.4508     | 30.05953 | 20.37081    | 16.8338   | 12.7563  | 16.67597    | 25.1445  | 28.99912    | 23.2352     | 21.67775 | 25.2469  | 26.7669  | 23.13174    | 34.50654    | 40.58622 | 37.8081  | 20.92153    | 12.63147 | 18.66636 | 12.24902    | 20.95388 | 34.7448  | 35.60356    | 23.78991  | 19.91417  | 37.13623    |          |
| CUST_53963_Pt429010886  | N103895 | 0.049432218 |        | 12    | 9      |            |                                           |                    | 8.281737 | 28.43382    | 22.31213 | 3.357895    | 13.91274  | 13.71712 | 17.88948    | 29.03394 | 31.81746    | 26.64919    | 27.76408 | 24.73091 | 20.52618 | 18.25337    | 23.24141    | 14.84777 | 23.90216 | 22.86904    | 21.5284  | 27.30294 | 23.90299    | 65.52431 | 46.74583 | 27.50428    | 21.9708   | 21.54205  | 17.95343    |          |
| CUST_536185_Pt429010886 | M113049 | 0.049432218 |        | 12    | 3      |            |                                           |                    | 87.20964 | 111.653     | 58.29201 | 101.0722    | 87.246732 | 94.21867 | 98.12783    | 98.27861 | 75.29824    | 63.34343    | 78.73755 | 51.94495 | 67.58778 | 73.4533     | 59.46351    | 104.5021 | 122.51   | 95.20029    | 69.79983 | 93.75176 | 74.10307    | 62.00499 | 101.6099 | 140.7983    | 71.71217  | 87.11871  | 90.7528     | 67.3848  |
| CUST_7542_Pt429010886   | M10943  | 0.049432218 |        | 12    | 3      | 340842895  | Lipoteauase vannamei                      | adenine iTransport | 3.02E-74 | 2846.594    | 3767.349 | 3452.681    | 1602.477  | 2992.811 | 2326.145    | 3480.931 | 3575.021    | 3631.442    | 3416.236 | 2194.41  | 1653.462 | 2027.732    | 3082.217    | 217.824  | 3851.067 | 4475.935    | 3709.96  | 2484.519 | 3286.945    | 265.8328 | 1878.294 | 2763.89     | 1876.444  | 2521.303  | 4031.99     | 2244.174 |
| CUST_46055_Pt429010886  | M71206  | 0.049432218 |        | 12    | 9      |            |                                           |                    | 88.97825 | 73.64351    | 95.74045 | 77.3983     | 63.87749  | 81.72936 | 83.21526    | 67.90601 | 63.49903    | 100.1424    | 89.19083 | 80.02644 | 96.61391 | 75.32925    | 78.7709     | 80.7391  | 58.27052 | 75.63986    | 83.0128  | 63.96849 | 72.90397    | 95.70549 | 14.6474  | 90.03155    | 92.92674  | 82.87384  | 74.86675    |          |
| CUST_4531_Pt429010886   | N16940  | 0.049432218 |        | 12    | 3      |            |                                           |                    | 51.17575 | 171.912     | 132.1556 | 168.9327    | 289.3393  | 205.2408 | 168.4808    | 126.4623 | 189.7707    | 117.9281    | 169.3408 | 188.7661 | 169.6995 | 197.796     | 121.7189    | 201.3401 | 159.2709 | 239.4831    | 122.4018 | 93.5715  | 82.04507    | 147.5789 | 119.3879 | 219.187     | 133.3669  | 208.7508  |             |          |
| CUST_7378_Pt429010886   | N21451  | 0.049432218 |        | 12    | 3      | 402888768  | PREDICTED: oxysterol-binding pTransport   | Lipid transport    | 2.66E-35 | 195.9604    | 250.8664 | 224.2026    | 219.4299  | 202.1626 | 286.6545    | 231.3966 | 241.2245    | 213.7108    | 262.04   | 179.1302 | 218.1432 | 234.5996    | 199.0877    | 218.7135 | 333.7805 | 273.7185    | 314.7154 | 259.4124 | 224.2516    | 243.6749 | 254.533  | 221.6228    | 189.3839  | 295.1733  | 243.5905    | 275.0783 |
| CUST_9163_Pt429010886   | N21463  | 0.049432218 |        | 12    | 3      | 241647552  | translocon-associated protein, gTransport | Protein transport  | 4.36E-46 | 541.2118    | 693.9081 | 256.3164    | 467.3293  | 769.305  | 784.4035    | 606.7201 | 987.5397    | 564.6439    | 465.2004 | 535.748  | 440.7516 | 362.2101    | 717.9895    | 500.8894 | 860.5197 | 633.2997    | 504.4324 | 593.0437 | 608.988     | 640.6597 | 247.7035 | 418.5156    | 827.5626  | 255.0769  |             |          |
| CUST_53407_Pt429010886  | M12509  | 0.04943285  |        | 24    | 21     |            |                                           |                    | 75.0185  | 155.8206    | 122.1097 | 96.05467    | 108.1041  | 101.6328 | 97.83185    | 136.5677 | 124.3455    | 95.05516    | 123.7628 | 73.9156  | 56.37995 | 98.86808    | 103.914     | 118.8496 | 149.2467 | 143.7425    | 101.4235 | 138.4144 | 144.144     | 146.7486 | 134.2506 | 152.7137    | 120.0673  | 123.6152  | 155.885     |          |
| CUST_8909_Pt429010886   | N23780  | 0.049454274 |        | 18    | 0      | 307169530  | Echinoderm microtubule-associ             |                    | 1.37E-88 | 13.42476    | 12.08402 | 11.67122 NA | 8.934291  | 14.42283 | 5.475538 NA | 6.59057  | 6.051393 NA | 4.850507 NA | 5.343997 | 9.84334  | 11.08375 | 144.1758    | 5.852604 NA | 23.36064 | 14.1758  | 5.852604 NA | 23.36064 | 14.1758  | 5.852604 NA | 23.36064 | 14.1758  | 5.852604 NA | 23.36064  | 14.1758   | 5.852604 NA |          |
| CUST_56710_Pt429010886  | M114493 | 0.049545274 |        | 24    | 18     |            |                                           |                    | 355.6308 | 287.8854    | 347.6198 | 294.9654    | 193.0974  | 257.3941 | 311.2489    | 296.1058 | 129.007     | 382.1124    | 144.474  | 343.8057 | 338.8395 | 284.7236    | 364.8648    | 325.3527 | 385.121  | 323.3549    | 418.0505 | 288.4809 | 364.1244    | 177.4802 | 324.4202 | 324.4202    | 405.2976  | 259.3203  | 150.2498    |          |
| CUST_36791_Pt429010886  | N16871  | 0.049592181 |        | 12    | 3      |            |                                           |                    | 305.3135 | 333.2833    | 284.4662 | 403.2127    | 376.5146  | 337.294  | 357.7827    | 316.1661 | 348.5318    | 337.5198    | 240.802  | 389.3624 | 354.9347 | 254.4159    | 248.4962    | 376.8731 | 356.0032 | 461.906     | 387.8304 | 301.6558 | 348.964     | 365.7068 | 402.1648 | 422.7276    | 324.3641  | 268.4249  | 287.5406    |          |
| CUST_12865_Pt429010886  | N9132   | 0.049598693 |        | 21    | 6      | 321470071  | hypothetical protein DAPPUORA             |                    | 1.31E-09 | 68.03257    | 47.61903 | 12.70623    | 12.7795   | 10.1478  | 62.05756    | 129.9419 | 48.3568 NA  | 25.56181    | 22.14763 | 3.859662 | 18.5866  | 20.57521 NA | NA          | NA       | NA       | NA          | NA       | NA       | NA          | NA       | NA       | NA          | NA        | NA        | NA          |          |
| CUST_17210_Pt429010886  | N37580  | 0.049625914 |        | 12    | 3      |            |                                           |                    | 8.057556 | 8.026216    | 9.373767 | 12.60763    | 6.456174  | 15.75335 | 8.988284    | 7.95024  | 11.59098    | 12.30413    | 5.677488 | 5.627759 | 11.61625 | 9.260771 NA | 16.33412    | 13.50832 | 16.02378 | 9.180205    | 10.2893  | 11.56464 | 13.30046    | 9.988283 | 5.245922 | 12.76907    | 7.737208  | 11.32969  |             |          |
| CUST_7542_Pt429010886   | M10943  | 0.049641821 |        | 24    | 21     | 383864803  | PREDICTED: RNA-binding protein            |                    | 2.26E-34 | 1061.955    | 185.8206 | 122.1097    | 96.05467  | 108.1041 | 101.6328    | 97.83185 | 136.5677    | 124.3455    | 95.05516 | 123.7628 | 73.9156  | 56.37995    | 98.86808    | 103.914  | 118.8496 | 149.2467    | 143.7425 | 101.4235 | 138.4144    | 144.144  | 146.7486 | 134.2506    | 152.7137  | 120.0673  | 123.6152    | 155.885  |
| CUST_1941_Pt429010886   | N11130  | 0.049697037 |        | 24    | 0      | 291240019  | PREDICTED: obscurin, cytoskeleton         |                    | 3.73E-21 | 77.12608    | 67.68058 | 92.31393    | 80.59242  | 56.73963 | 62.338      | 47.79314 | 60.71646    | 50.20946    | 86.36384 | 64.54817 | 70.62768 | 62.05756    | 75.96228    | 75.10319 | 62.84622 | 75.04432    | 39.80553 | 79.90154 | 88.10909    | 76.17615 | 95.2367  | 92.83981    | 91.16754  | 104.7593  |             |          |
| CUST_25237_Pt429010886  | N52040  | 0.049723224 |        | 21    | 15     |            |                                           |                    | 615.1114 | 1188.024</  |          |             |           |          |             |          |             |             |          |          |          |             |             |          |          |             |          |          |             |          |          |             |           |           |             |          |
