# Supplementary material for: Analysis of the circadian transcriptome of the Antarctic krill Euphausia superba
Source: Sci Rep. 2019 Sep 25;9:13894. doi: 10.1038/s41598-019-50282-1 (PMC6761102; doi:10.1038/s41598-019-50282-1)
Supplement: Supplementary file 3 — Supplementary Table 2 [file 41598_2019_50282_MOESM3_ESM.pdf]

## **Analysis of the circadian transcriptome of the Antarctic krill *Euphausia superba***

Alberto Biscontin<sup>1,2,\*</sup>, Paolo Martini<sup>1</sup>, Rodolfo Costa<sup>1</sup>, Achim Kramer<sup>2</sup>, Bettina Meyer<sup>3,4,5</sup>, So Kawaguchi<sup>6</sup>, Mathias Teschke<sup>3</sup>, Cristiano De Pittà<sup>1,\*</sup>

<sup>1</sup>Dipartimento di Biologia, Università degli Studi di Padova, Padova, Italy

<sup>2</sup>Laboratory of Chronobiology, Charité Universitätsmedizin Berlin, Berlin, Germany

<sup>3</sup>Section Polar Biological Oceanography, Alfred Wegener Institute Helmholtz Centre for Polar and Marine Research, Bremerhaven, Germany

<sup>4</sup>Institute for Chemistry and Biology of the Marine Environment, Carl von Ossietzky University of Oldenburg, Oldenburg, Germany

<sup>5</sup>Helmholtz Institute for Functional Marine Biodiversity (HIFMB) at the University of Oldenburg, 26111 Oldenburg, Germany

<sup>6</sup>Department of Environment and Heritage, Australian Antarctic Division, Kingston, Tasmania, Australia

\*Corresponding authors:

Cristiano De Pittà, Dipartimento di Biologia, Università degli Studi di Padova, via U. Bassi 58/B 35131 Padova, Italy; Phone: +39-049-8276210; Fax: +39-049-8276209; e-mail address: cristiano.depitta@unipd.it

Alberto Biscontin, Dipartimento di Biologia, Università degli Studi di Padova, via U. Bassi 58/B 35131 Padova, Italy; Phone: +39-049-8276228; Fax: +39-049-8276209; e-mail address: alberto.biscontin@unipd.it

Supplementary Table 2. List of 6,561 genes with a sinusoidal expression pattern in DD.

Expression levels of genes, identified by RAIN (adjusted  $p$ -value = 0.05) throughout the 24 hours cycle in DD regime, are shown. \* Probe ID: ID of probe sequence in "Köll 2.0" Agilent microarray platform; <sup>†</sup> ID: accession number of the full master transcriptome <sup>‡</sup>.

\*  $p$ -value: RAIN (Benjamini-Hochberg adjusted  $p$ -value); \* Period: period of oscillation; \* Phase: maximum peak of expression throughout the 24 hours cycle; \* EBH: ID: accession number of EBH; \* Annotation: description of the gene; \* GO term: gene ontology biological process;

GO rich term: most fitting gene ontology rich term to further refine the functional annotation; <sup>§</sup> value: score of GO functional annotation with BLAST2GO; <sup>||</sup> mRNA expression.

|                       |        |          |    |    |                                                                                     |                     |          |            |            |            |            |            |            |            |            |            |            |            |            |            |            |            |            |            |            |            |            |            |            |            |            |            |            |            |
|-----------------------|--------|----------|----|----|-------------------------------------------------------------------------------------|---------------------|----------|------------|------------|------------|------------|------------|------------|------------|------------|------------|------------|------------|------------|------------|------------|------------|------------|------------|------------|------------|------------|------------|------------|------------|------------|------------|------------|------------|
| CUST_37166_P142010886 | M18062 | 7:52E-07 | 24 | 21 | 348557855 PREDICTED: cell division cycle protein 123 homolog Cytosolic Process      | G category          | 4.31E-74 | 37.27042   | 45.83957   | 29.51147   | 36.14912   | 29.08151   | 28.24369   | 19.35374   | 17.14965   | 20.32495   | 42.30947   | 26.49443   | 30.14577   | 26.73374   | 33.78378   | 32.63687   | 37.21299   | 32.6735    | 33.88016   | 20.06792   | 36.89353   | 36.10622   | 52.94516   | 43.65862   | 60.99398   | 39.48091   | 28.71965   | 41.36603   |
| CUST_39506_P142010886 | N24477 | 1:03E-07 | 24 | 3  | 13095756 cell cycle [Cotoperates aciniforms]                                        | Metabolic process   | 4.54E-74 | NA         | 55.79171   | 95.74774   | 75.74134   | 60.93977   | 42.45717   | 15.40116   | 13.00124   | 32.48546   | 228.3459   | 29.79379   | 33.56147   | 22.88866   | 21.70379   | 35.26861   | 37.58993   | 58.36312   | 17.58804   | 55.18801   | 44.68105   | 91.19807   | NA         | 392.4795   | 174.6774   | 71.12763   | NA         | 43.6072    |
| CUST_42369_P142010886 | M00124 | 1:11E-06 | 0  | 9  |                                                                                     |                     | 100.7563 | 245.7365   | 212.4051   | 178.6289   | 162.6286   | 167.982    | 126.2208   | 100.3002   | 102.4025   | 179.9946   | 170.6145   | 172.3443   | 134.9425   | 170.4277   | 174.1781   | 215.2456   | 217.2265   | 187.746    | 277.427    | 131.1966   | 166.188    | 169.4032   | 137.5108   | 112.2867   | 179.1024   | 140.228    | 143.7848   | 31.6303    |
| CUST_10872_P142010886 | N26923 | 1:16E-06 | 0  | 9  |                                                                                     |                     | 25.67033 | 24.41159   | 18.97393   | 18.7409    | 18.7053    | 18.98962   | 18.98962   | 18.98962   | 18.98962   | 18.98962   | 18.98962   | 18.98962   | 18.98962   | 18.98962   | 18.98962   | 18.98962   | 18.98962   | 18.98962   | 18.98962   | 18.98962   | 18.98962   | 18.98962   | 18.98962   | 18.98962   | 18.98962   | 18.98962   | 18.98962   | 18.98962   |
| CUST_2556_P142010886  | N12615 | 1:41E-06 | 21 | 9  |                                                                                     |                     | 36.58662 | 9.44083    | NA         | 3.87422    | 257.6078   | 10.0421    | 62.7882    | 6.78992    | 69.98939   | 20.36839   | 27.53328   | 19.1365    | 146.902    | 151.0368   | 146.4237   | 137.127    | 124.951    | 143.3064   | 144.4075   | 141.8604   | 112.4025   | 146.7026   | 100.957    | 77.0854    | 145.7026   | 100.957    | 49.32745   | 40.92745   |
| CUST_11942_P142010886 | N28667 | 1:42E-06 | 24 | 12 |                                                                                     |                     | 5.99789  | 25.08483   | 13.06782   | 28.90009   | 25.4154    | 29.91175   | 63.0854    | 4.2531     | 15.51191   | 37.9359    | 84.42877   | 37.93595   | 101.1596   | 107.1241   | 43.1243    | 46.04195   | 29.71896   | 51.06646   | 37.93595   | 78.81384   | 64.66736   | 26.92776   | 32.60782   | 26.9806    | 53.9994    | 13.12705   | 39.0335    | 72.02195   |
| CUST_37372_P142010886 | M12185 | 1:62E-06 | 24 | 0  | 683162 ReName: Full-60S ribosomal protein L15 [γ4530 Protein metabolism]            | Ribosome biogenesis | 8.7E-82  | 598.8858   | 719.0742   | 5396.825   | 7060.087   | 5258.982   | 5492.691   | 31.61855   | 3067.321   | 4257.291   | 24.3248    | 2659.902   | 386.951    | 204.906    | 376.553    | 259.94     | 271.2785   | 362.6416   | 399.112    | 3653.581   | 6049.937   | 12.21831   | 21.80831   | 20.9231    | 25888.291  | 72.02195   | 72.02195   |            |
| CUST_52918_P142010886 | M94249 | 1:98E-06 | 0  | 9  | 168824672 Euphasia superba luteol 214 cytochrome c oxid                             | DNA replication     | 1.27E-94 | 206.8341   | 275.9866   | 226.2124   | 215.995    | 284.093    | 104.021    | 128.061    | 131.146    | 148.197    | 167.445    | 272.842    | 119.4462   | 265.045    | 232.3859   | 154.744    | 149.603    | 91.88705   | 100.5294   | 23.53701   | 199.1454   | 106.8139   | 40.6457    | 142.177    | 228.708    | 100.314    | 100.314    | 100.314    |
| CUST_37473_P142010886 | M09930 | 1:51E-06 | 24 | 15 | 304674721 the prokaryotic protein CRE_12860 (Cytosolic ribonucleic acid metabolism) | DNA replication     | 1.28E-14 | 1.81.27038 | 1.81.27038 | 1.81.27038 | 1.81.27038 | 1.81.27038 | 1.81.27038 | 1.81.27038 | 1.81.27038 | 1.81.27038 | 1.81.27038 | 1.81.27038 | 1.81.27038 | 1.81.27038 | 1.81.27038 | 1.81.27038 | 1.81.27038 | 1.81.27038 | 1.81.27038 | 1.81.27038 | 1.81.27038 | 1.81.27038 | 1.81.27038 | 1.81.27038 | 1.81.27038 | 1.81.27038 | 1.81.27038 | 1.81.27038 |
| CUST_52111_P142010886 | M06435 | 2:26E-06 | 18 | 15 |                                                                                     |                     | 39.1369  | 56.40834   | 86.24055   | 55.24093   | 122.88215  | 68.88215   | 104.0725   | 17.3446    | 34.48483   | 60.50127   | 22.74822   | 61.5       | 61.6446    | 76.2646    | 63.07552   | 50.1240    | 40.6278    | 51.67624   | 85.81005   | 55.71651   | 87.04768   | 74.81005   | 30.6457    | 37.71676   | 49.0935    | 19.3334    | 41.0187    |            |
| CUST_29585_P142010886 | N01049 | 3:26E-06 | 15 | 12 |                                                                                     |                     | 68.769   | 45.7121    | 122.5811   | 42.16099   | 23.117     | 37.08988   | 68.2542    | 84.43869   | 79.60858   | 67.03863   | 36.48665   | 78.53416   | 111.2973   | 164.8084   | 118.8563   | 107.4777   | 32.6755    | 25.40127   | 29.9146    | 78.282     | 82.0242    | 72.8022    | 72.8022    | 72.8022    | 72.8022    | 72.8022    | 72.8022    | 72.8022    |
| CUST_23205_P142010886 | N48538 | 3:63E-06 | 24 | 18 |                                                                                     |                     | 79.43105 | 81.7107    | 81.3601    | 64.01814   | 21.15336   | 37.64097   | 62.578     | 69.258     | 91.50018   | 56.19981   | 67.77286   | 58.52324   | 53.16431   | 53.08081   | 81.86637   | 68.61878   | 54.49444   | 49.49668   | 42.3636    | 72.74687   | 61.02204   | 81.95659   | 61.81205   | 85.91368   | 85.91368   | 85.91368   | 85.91368   | 85.91368   |
| CUST_37254_P142010886 | N13839 | 3:64E-06 | 15 | 9  |                                                                                     |                     | 108.0802 | 140.2752   | 183.1877   | 181.25016  | 169.7028   | 164.5104   | 150.5675   | 185.1847   | 163.9462   | 212.0939   | 146.7139   | 178.0431   | 148        | 236.4903   | 144.7991   | 139.5841   | 135.5841   | 138.6138   | 118.6343   | 139.5841   | 139.5841   | 139.5841   | 139.5841   | 139.5841   | 139.5841   | 139.5841   | 139.5841   |            |
| CUST_37473_P142010886 | M09930 | 3:64E-06 | 15 | 9  |                                                                                     |                     | 1465.06  | 4824.066   | 410.812    | 1260.066   | 241.166    | 241.598    | 2741.456   | 2784.17    | 2401.587   | 241.598    | 2741.456   | 2784.17    | 2401.587   | 241.598    | 2741.456   | 2784.17    | 2401.587   | 241.598    | 2741.456   | 2784.17    | 2401.587   | 241.598    | 2741.456   | 2784.17    | 2401.587   | 241.598    | 2741.456   | 2784.17    |
| CUST_45308_P142010886 | M06858 | 3:74E-06 | 12 | 0  | 358442122 Broad-complex protein isoform 1 [Pneumonia monod]                         |                     | 1.04E-49 | 2.01.835   | 24.7821    | 32.10055   | 14.80038   | 14.50089   | 9.815858   | 15.3921    | 14.4753    | 10.55126   | 15.3921    | 14.4753    | 10.55126   | 15.3921    | 14.4753    | 10.55126   | 15.3921    | 14.4753    | 10.55126   | 15.3921    | 14.4753    | 10.55126   | 15.3921    | 14.4753    | 10.55126   | 15.3921    | 14.4753    | 10.55126   |
| CUST_51049_P142010886 | M01954 | 5:36E-06 | 21 | 18 |                                                                                     |                     | 314.8877 | 385.4652   | 410.06     | 162.6527   | 300.737    | 271.7176   | 174.0729   | 137.2513   | 187.2939   | 213.0864   | 185.4691   | 186.6749   | 189.973    | 260.379    | 271.7176   | 213.0864   | 185.4691   | 186.6749   | 189.973    | 260.379    | 271.7176   | 213.0864   | 185.4691   | 186.6749   | 189.973    | 260.379    | 271.7176   | 213.0864   |
| CUST_46414_P142010886 | M72608 | 5:34E-06 | 24 | 18 | 405959130 Elongator complex protein 1 [Carnotia gigas]                              |                     | 1.77E-16 | 18.78752   | 16.14633   | 28.00255   | 19.31282   | 18.93182   | 17.39308   | 19.09041   | 22.78742   | 21.43971   | 23.36338   | 13.2457    | 26.7021    | 24.7457    | 23.3672    | 19.3955    | 36.9678    | 24.4174    | 36.33605   | 58.58633   | 34.12708   | 36.33605   | 34.12708   | 36.33605   | 34.12708   | 36.33605   | 34.12708   | 36.33605   |
| CUST_16075_P142010886 | N39594 | 5:41E-06 | 24 | 21 |                                                                                     |                     | 222.578  | 221.425    | 213.51     | 189.262    | 182.292    | 167.404    | 155.041    | 142.7507   | 151.386    | 299.389    | 178.288    | 173.007    | 167.3309   | 216        | 207.0153   | 260.7005   | 210.6402   | 216.258    | 185.636    | 209.799    | 244.502    | 275.999    | 244.502    | 275.999    | 244.502    | 275.999    | 244.502    | 275.999    |
| CUST_50106_P142010886 | M08646 | 5:77E-06 | 18 | 15 |                                                                                     |                     | 35.38892 | 56.62122   | 35.78943   | 32.06361   | 28.38943   | 30.52035   | 37.0131    | 37.00901   | 30.26613   | 37.54361   | 30.1253    | 37.12224   | 43.9536    | 45.18753   | 52.56534   | 38.15149   | 47.01793   | 36.91363   | 42.28142   | 34.35554   | 27.2314    | 42.28142   | 34.35554   | 27.2314    | 42.28142   | 34.35554   | 27.2314    | 42.28142   |
| CUST_4336_P142010886  | N16534 | 5:94E-06 | 12 | 0  |                                                                                     |                     | 77.02303 | 93.3033    | 73.81894   | 26.7962    | 26.47171   | 22.12205   | 26.56366   | 46.51079   | 37.11837   | 63.45188   | 52.58486   | 80.10123   | 72.2954    | 128.4226   | 69.9257    | 27.2402    | 26.59751   | 17.39272   | 69.89082   | 60.40681   | 51.13662   | 80.34778   | 27.64515   | 38.841     | 85.93471   | 69.1945    | 71.79316   |            |
| CUST_5935_P142010886  | N24794 | 6:03E-06 | 24 | 18 |                                                                                     |                     | 2.07E-37 | 35.27881   | 47.58792   | 46.09232   | 9.01887    | 28.40026   | 26.58228   | 29.04798   | 21.14283   | 24.0422    | 25.31397   | 25.31397   | 25.31397   | 25.31397   | 25.31397   | 25.31397   | 25.31397   | 25.31397   | 25.31397   | 25.31397   | 25.31397   | 25.31397   | 25.31397   | 25.31397   | 25.31397   | 25.31397   | 25.31397   | 25.31397   |
| CUST_29551_P142010886 | N96993 | 6:41E-06 | 18 | 0  |                                                                                     |                     | 51.35337 | 30.57897   | 27.71495   | 23.20447   | 25.56884   | 28.05565   | 20.9831    | 16.82346   | 17.3605    | 25.7064    | 18.1158    | 25.35341   | 23.97464   | 71.88593   | 71         |            |            |            |            |            |            |            |            |            |            |            |            |            |

| Probe ID                  | p-value | Period   | Phase | EBI ID | Annotation | GO category                                        | Go term           | E-value  | 0        | 1        | 2        | 3        | 4       | 5       | 6        | 7        | 8        | 9        | 10       | 11       | 12       | 13       | 14       | 15       | 16      | 17      | 18       | 19      | 20       | 21       | 22       | 23 | 24 | 25 |
|---------------------------|---------|----------|-------|--------|------------|----------------------------------------------------|-------------------|----------|----------|----------|----------|----------|---------|---------|----------|----------|----------|----------|----------|----------|----------|----------|----------|----------|---------|---------|----------|---------|----------|----------|----------|----|----|----|
| CUST_16648_P142010886     | N36626  | 8.48E-05 | 18    | 3      | 67.57577   | 70.08423                                           | 90.19499          | 104.8092 | 78.26326 | 36.20021 | 63.65227 | 24.27879 | 67.3235 | 5.21879 | 62.85005 | 45.94969 | 52.10062 | 47.70628 | 39.42607 | 71.10646 | 63.34141 | 75.68737 | 59.38994 | 39.39152 | 74.6613 | 71.9913 | 62.31536 | 64.2414 | 63.74147 | 65.04995 | 45.74288 |    |    |    |
| CUST_38712_P142010886     | M29383  | 8.77E-05 | 15    | 3      | 79.5191223 | Euphasia superba voucher 702K mitochondrion, p     |                   |          |          |          |          |          |         |         |          |          |          |          |          |          |          |          |          |          |         |         |          |         |          |          |          |    |    |    |
| CUST_8092_R93973142010886 | N25257  | 8.87E-05 | 15    | 3      | 345490220  | PREDICTED: Euphasia superba voucher LCC00121192 ic |                   |          |          |          |          |          |         |         |          |          |          |          |          |          |          |          |          |          |         |         |          |         |          |          |          |    |    |    |
| CUST_45641_P142010886     | N36676  | 8.87E-05 | 15    | 3      | 224857574  | Exportin-1 [Salmo salar]                           |                   |          |          |          |          |          |         |         |          |          |          |          |          |          |          |          |          |          |         |         |          |         |          |          |          |    |    |    |
| CUST_9339_P142010886      | N24462  | 8.82E-05 | 15    | 12     |            |                                                    |                   |          |          |          |          |          |         |         |          |          |          |          |          |          |          |          |          |          |         |         |          |         |          |          |          |    |    |    |
| CUST_715_P142010886       | N6896   | 8.9E-05  | 15    | 9      |            |                                                    |                   |          |          |          |          |          |         |         |          |          |          |          |          |          |          |          |          |          |         |         |          |         |          |          |          |    |    |    |
| CUST_53318_P142010886     | N101251 | 8.9E-05  | 24    | 9      |            |                                                    |                   |          |          |          |          |          |         |         |          |          |          |          |          |          |          |          |          |          |         |         |          |         |          |          |          |    |    |    |
| CUST_2040_P142010886      | N166714 | 8.9E-05  | 24    | 15     |            |                                                    |                   |          |          |          |          |          |         |         |          |          |          |          |          |          |          |          |          |          |         |         |          |         |          |          |          |    |    |    |
| CUST_25716_P142010886     | N25931  | 9.18E-05 | 15    | 9      |            |                                                    |                   |          |          |          |          |          |         |         |          |          |          |          |          |          |          |          |          |          |         |         |          |         |          |          |          |    |    |    |
| CUST_713_P142010886       | N6893   | 9.23E-05 | 15    | 12     |            |                                                    |                   |          |          |          |          |          |         |         |          |          |          |          |          |          |          |          |          |          |         |         |          |         |          |          |          |    |    |    |
| CUST_34086_P142010886     | M8733   | 9.7E-05  | 18    | 3      |            |                                                    |                   |          |          |          |          |          |         |         |          |          |          |          |          |          |          |          |          |          |         |         |          |         |          |          |          |    |    |    |
| CUST_38273_P142010886     | M42900  | 9.73E-05 | 24    | 9      |            |                                                    |                   |          |          |          |          |          |         |         |          |          |          |          |          |          |          |          |          |          |         |         |          |         |          |          |          |    |    |    |
| CUST_50532_P142010886     | M0163   | 1.00E-05 | 15    | 3      | 443708502  | hypothetical protein CAPTEDRAFT_185644 [Capitell   |                   |          |          |          |          |          |         |         |          |          |          |          |          |          |          |          |          |          |         |         |          |         |          |          |          |    |    |    |
| CUST_20246_P142010886     | N43095  | 0.000109 | 12    | 9      |            |                                                    |                   |          |          |          |          |          |         |         |          |          |          |          |          |          |          |          |          |          |         |         |          |         |          |          |          |    |    |    |
| CUST_44716_P142010886     | M66762  | 0.000111 | 18    | 3      |            |                                                    |                   |          |          |          |          |          |         |         |          |          |          |          |          |          |          |          |          |          |         |         |          |         |          |          |          |    |    |    |
| CUST_8964_P142010886      | N12867  | 0.000112 | 12    | 9      |            |                                                    |                   |          |          |          |          |          |         |         |          |          |          |          |          |          |          |          |          |          |         |         |          |         |          |          |          |    |    |    |
| CUST_36102_P142010886     | M16348  | 0.000113 | 24    | 15     |            |                                                    |                   |          |          |          |          |          |         |         |          |          |          |          |          |          |          |          |          |          |         |         |          |         |          |          |          |    |    |    |
| CUST_3554_P142010886      | N16194  | 0.000117 | 15    | 12     | 321455934  | hypothetical protein DAPUDRAFT_309375 [Daphn       |                   |          |          |          |          |          |         |         |          |          |          |          |          |          |          |          |          |          |         |         |          |         |          |          |          |    |    |    |
| CUST_13573_P142010886     | N13397  | 0.000118 | 24    | 15     |            |                                                    |                   |          |          |          |          |          |         |         |          |          |          |          |          |          |          |          |          |          |         |         |          |         |          |          |          |    |    |    |
| CUST_36731_P142010886     | N36123  | 0.000118 | 24    | 3      |            |                                                    |                   |          |          |          |          |          |         |         |          |          |          |          |          |          |          |          |          |          |         |         |          |         |          |          |          |    |    |    |
| CUST_21983_P142010886     | N46209  | 0.000121 | 18    | 3      |            |                                                    |                   |          |          |          |          |          |         |         |          |          |          |          |          |          |          |          |          |          |         |         |          |         |          |          |          |    |    |    |
| CUST_25453_P142010886     | N25446  | 0.000122 | 18    | 3      |            |                                                    |                   |          |          |          |          |          |         |         |          |          |          |          |          |          |          |          |          |          |         |         |          |         |          |          |          |    |    |    |
| CUST_39873_P142010886     | M46045  | 0.000123 | 24    | 15     |            |                                                    |                   |          |          |          |          |          |         |         |          |          |          |          |          |          |          |          |          |          |         |         |          |         |          |          |          |    |    |    |
| CUST_42802_P142010886     | M61293  | 0.000124 | 24    | 3      |            |                                                    |                   |          |          |          |          |          |         |         |          |          |          |          |          |          |          |          |          |          |         |         |          |         |          |          |          |    |    |    |
| CUST_2040_P142010886      | N166714 | 0.000124 | 15    | 9      | 321455300  | hypothetical protein DAPUDRAFT_64687 [Daphnia      |                   |          |          |          |          |          |         |         |          |          |          |          |          |          |          |          |          |          |         |         |          |         |          |          |          |    |    |    |
| CUST_714_P142010886       | N6894   | 0.000125 | 15    | 9      |            |                                                    |                   |          |          |          |          |          |         |         |          |          |          |          |          |          |          |          |          |          |         |         |          |         |          |          |          |    |    |    |
| CUST_32645_P142010886     | M4677   | 0.000126 | 12    | 9      | 321462910  | hypothetical protein DAPUDRAFT_307535 [Daphn       | Protein synthesis |          |          |          |          |          |         |         |          |          |          |          |          |          |          |          |          |          |         |         |          |         |          |          |          |    |    |    |
| CUST_15676_P142010886     | N41996  | 0.000126 | 18    | 12     |            |                                                    |                   |          |          |          |          |          |         |         |          |          |          |          |          |          |          |          |          |          |         |         |          |         |          |          |          |    |    |    |
| CUST_19230_P142010886     | N43432  | 0.000127 | 15    | 12     |            |                                                    |                   |          |          |          |          |          |         |         |          |          |          |          |          |          |          |          |          |          |         |         |          |         |          |          |          |    |    |    |
| CUST_39103_P142010886     | N43432  | 0.000127 | 15    | 12     | 437894844  | hypothetical protein, partial [Lactobacillus i     | -ng               |          |          |          |          |          |         |         |          |          |          |          |          |          |          |          |          |          |         |         |          |         |          |          |          |    |    |    |
| CUST_10210_P142010886     | N25881  | 0.00013  | 15    | 9      |            |                                                    |                   |          |          |          |          |          |         |         |          |          |          |          |          |          |          |          |          |          |         |         |          |         |          |          |          |    |    |    |
| CUST_25532_P142010886     | N25881  | 0.000131 | 18    | 3      |            |                                                    |                   |          |          |          |          |          |         |         |          |          |          |          |          |          |          |          |          |          |         |         |          |         |          |          |          |    |    |    |
| CUST_29122_P142010886     | N5407   | 0.000131 | 18    | 3      |            |                                                    |                   |          |          |          |          |          |         |         |          |          |          |          |          |          |          |          |          |          |         |         |          |         |          |          |          |    |    |    |
| CUST_12095_P142010886     | N4320   | 0.000131 | 15    | 12     |            |                                                    |                   |          |          |          |          |          |         |         |          |          |          |          |          |          |          |          |          |          |         |         |          |         |          |          |          |    |    |    |
| CUST_5170_P142010886      | N4320   | 0.000131 | 15    | 12     |            |                                                    |                   |          |          |          |          |          |         |         |          |          |          |          |          |          |          |          |          |          |         |         |          |         |          |          |          |    |    |    |
| CUST_51673_P142010886     | M4531   | 0.000137 | 24    | 15     |            |                                                    |                   |          |          |          |          |          |         |         |          |          |          |          |          |          |          |          |          |          |         |         |          |         |          |          |          |    |    |    |
| CUST_52430_P142010886     | M57422  | 0.000138 | 12    | 9      |            |                                                    |                   |          |          |          |          |          |         |         |          |          |          |          |          |          |          |          |          |          |         |         |          |         |          |          |          |    |    |    |
| CUST_47472_P142010886     | M76089  | 0.000141 | 24    | 18     |            |                                                    |                   |          |          |          |          |          |         |         |          |          |          |          |          |          |          |          |          |          |         |         |          |         |          |          |          |    |    |    |
| CUST_47472_P142010886     | M76089  | 0.000141 | 24    | 18     |            |                                                    |                   |          |          |          |          |          |         |         |          |          |          |          |          |          |          |          |          |          |         |         |          |         |          |          |          |    |    |    |
| CUST_47472_P142010886     | M76089  | 0.000141 | 24    | 18     |            |                                                    |                   |          |          |          |          |          |         |         |          |          |          |          |          |          |          |          |          |          |         |         |          |         |          |          |          |    |    |    |
| CUST_47472_P142010886     | M76089  | 0.000141 | 24    | 18     |            |                                                    |                   |          |          |          |          |          |         |         |          |          |          |          |          |          |          |          |          |          |         |         |          |         |          |          |          |    |    |    |
| CUST_47472_P142010886     | M76089  | 0.000141 | 24    | 18     |            |                                                    |                   |          |          |          |          |          |         |         |          |          |          |          |          |          |          |          |          |          |         |         |          |         |          |          |          |    |    |    |
| CUST_47472_P142010886     | M76089  | 0.000141 | 24    | 18     |            |                                                    |                   |          |          |          |          |          |         |         |          |          |          |          |          |          |          |          |          |          |         |         |          |         |          |          |          |    |    |    |
| CUST_47472_P142010886     | M76089  | 0.000141 | 24    | 18     |            |                                                    |                   |          |          |          |          |          |         |         |          |          |          |          |          |          |          |          |          |          |         |         |          |         |          |          |          |    |    |    |
| CUST_47472_P142010886     | M76089  | 0.000141 | 24    | 18     |            |                                                    |                   |          |          |          |          |          |         |         |          |          |          |          |          |          |          |          |          |          |         |         |          |         |          |          |          |    |    |    |
| CUST_47472_P142010886     | M76089  | 0.000141 | 24    | 18     |            |                                                    |                   |          |          |          |          |          |         |         |          |          |          |          |          |          |          |          |          |          |         |         |          |         |          |          |          |    |    |    |
| CUST_47472_P142010886     | M76089  | 0.000141 | 24    | 18     |            |                                                    |                   |          |          |          |          |          |         |         |          |          |          |          |          |          |          |          |          |          |         |         |          |         |          |          |          |    |    |    |
| CUST_47472_P142010886     | M76089  | 0.000141 | 24    | 18     |            |                                                    |                   |          |          |          |          |          |         |         |          |          |          |          |          |          |          |          |          |          |         |         |          |         |          |          |          |    |    |    |
| CUST_47472_P142010886     | M76089  | 0.000141 | 24    | 18     |            |                                                    |                   |          |          |          |          |          |         |         |          |          |          |          |          |          |          |          |          |          |         |         |          |         |          |          |          |    |    |    |
| CUST_47472_P142010886     | M76089  | 0.000141 | 24    | 18     |            |                                                    |                   |          |          |          |          |          |         |         |          |          |          |          |          |          |          |          |          |          |         |         |          |         |          |          |          |    |    |    |
| CUST_47472_P142010886     | M76089  | 0.000141 | 24    | 18     |            |                                                    |                   |          |          |          |          |          |         |         |          |          |          |          |          |          |          |          |          |          |         |         |          |         |          |          |          |    |    |    |
| CUST_47472_P142010886     | M76089  | 0.000141 | 24    | 18     |            |                                                    |                   |          |          |          |          |          |         |         |          |          |          |          |          |          |          |          |          |          |         |         |          |         |          |          |          |    |    |    |
| CUST_47472_P142010886     | M76089  | 0.000141 | 24    | 18     |            |                                                    |                   |          |          |          |          |          |         |         |          |          |          |          |          |          |          |          |          |          |         |         |          |         |          |          |          |    |    |    |
| CUST_47472_P142010886     | M76089  | 0.000141 | 24    | 18     |            |                                                    |                   |          |          |          |          |          |         |         |          |          |          |          |          |          |          |          |          |          |         |         |          |         |          |          |          |    |    |    |
| CUST_47472_P142010886     | M76089  | 0.000141 | 24    | 18     |            |                                                    |                   |          |          |          |          |          |         |         |          |          |          |          |          |          |          |          |          |          |         |         |          |         |          |          |          |    |    |    |
| CUST_47472_P142010886     | M76089  | 0.000141 | 24    | 18     |            |                                                    |                   |          |          |          |          |          |         |         |          |          |          |          |          |          |          |          |          |          |         |         |          |         |          |          |          |    |    |    |
| CUST_47472_P142010886     | M76089  | 0.000141 | 24    | 18     |            |                                                    |                   |          |          |          |          |          |         |         |          |          |          |          |          |          |          |          |          |          |         |         |          |         |          |          |          |    |    |    |
| CUST_47472_P142010886     | M76089  | 0.000141 | 24    | 18     |            |                                                    |                   |          |          |          |          |          |         |         |          |          |          |          |          |          |          |          |          |          |         |         |          |         |          |          |          |    |    |    |
| CUST_47472_P142010886     | M76089  | 0.000141 | 24    | 18     |            |                                                    |                   |          |          |          |          |          |         |         |          |          |          |          |          |          |          |          |          |          |         |         |          |         |          |          |          |    |    |    |
| CUST_47472_P142010886     | M76089  | 0.000141 | 24    | 18     |            |                                                    |                   |          |          |          |          |          |         |         |          |          |          |          |          |          |          |          |          |          |         |         |          |         |          |          |          |    |    |    |
| CUST_47472_P142010886     | M76089  | 0.000141 | 24    | 18     |            |                                                    |                   |          |          |          |          |          |         |         |          |          |          |          |          |          |          |          |          |          |         |         |          |         |          |          |          |    |    |    |
| CUST_47472_P142010886     | M76089  | 0.000141 | 24    | 18     |            |                                                    |                   |          |          |          |          |          |         |         |          |          |          |          |          |          |          |          |          |          |         |         |          |         |          |          |          |    |    |    |
| CUST_47472_P142010886     | M76089  | 0.000141 | 24    | 18     |            |                                                    |                   |          |          |          |          |          |         |         |          |          |          |          |          |          |          |          |          |          |         |         |          |         |          |          |          |    |    |    |
| CUST_47472_P142010886     | M76089  | 0.000141 | 24    | 18     |            |                                                    |                   |          |          |          |          |          |         |         |          |          |          |          |          |          |          |          |          |          |         |         |          |         |          |          |          |    |    |    |
| CUST_47472_P142010886     | M76089  | 0.000141 | 24    | 18     |            |                                                    |                   |          |          |          |          |          |         |         |          |          |          |          |          |          |          |          |          |          |         |         |          |         |          |          |          |    |    |    |
| CUST_47472_P142010886     | M76089  | 0.000141 | 24    | 18     |            |                                                    |                   |          |          |          |          |          |         |         |          |          |          |          |          |          |          |          |          |          |         |         |          |         |          |          |          |    |    |    |







| Probe ID                       | p-value  | Period | Phase | EBI ID    | Annotation                                                          | GO category                          | Go term  | E-value  | 0        | 1        | 2        | 3        | 4        | 5        | 6        | 7        | 8        | 9        | 10       | 11       | 12       | 13       | 14       | 15       | 16       | 17       | 18       | 19       | 20       | 21       | 22       | 23       | 24       | 25       |         |
|--------------------------------|----------|--------|-------|-----------|---------------------------------------------------------------------|--------------------------------------|----------|----------|----------|----------|----------|----------|----------|----------|----------|----------|----------|----------|----------|----------|----------|----------|----------|----------|----------|----------|----------|----------|----------|----------|----------|----------|----------|----------|---------|
| CUST_9352_P142910886 N24480    | 0.001127 | 18     |       |           | Transport                                                           | Protein transport                    |          | 83.19226 | 93.82886 | 89.05037 | 119.589  | 146.722  | 118.3064 | 156.4788 | 110.5811 | 134.9479 | 126.5253 | 156.3478 | 120.5515 | 172.054  | 132.5238 | 130.0669 | 123.7779 | 123.9578 | 169.2493 | 100.5297 | 109.399  | 89.58026 | 122.8574 | 94.10691 | 134.577  | 178.9173 | 118.4488 | 225.2514 |         |
| CUST_9586_P142910886 N24878    | 0.001128 | 24     | 0     | 543729426 | PREDICTED: protein FAM86A [Columbia lila]                           |                                      | 8.67E-13 | 35.992   | 69.68816 | 37.50197 | 62.89021 | 24.94581 | 58.584   | 31.1664  | 19.70026 | 28.8477  | 30.73213 | 19.44289 | 53.6243  | 24.05603 | 32.79595 | 10.6554  | 20.70161 | 88.99888 | 32.7339  | 16.7133  | 91.3584  | 13.57051 | 74.69594 | 93.41214 | 43.01824 | 39.75702 | 57.0251  | 38.0772  |         |
| CUST_13113_P142910886 N30596   | 0.00113  | 15     | 12    |           |                                                                     |                                      | 15.7289  | 58.14864 | 57.76074 | 36.08252 | 34.50708 | 57.5944  | 38.04587 | 35.7173  | 68.0453  | 40.0486  | 48.0487  | 35.7173  | 68.0453  | 40.0486  | 48.0487  | 35.7173  | 68.0453  | 40.0486  | 48.0487  | 35.7173  | 68.0453  | 40.0486  | 48.0487  | 35.7173  | 68.0453  | 40.0486  | 48.0487  | 35.7173  | 68.0453 |
| CUST_2813_P142910886 N21481    | 0.00113  | 21     | 0     | 321469590 | hypothetical protein DAPDUFARF_51329 [Daphnia Developmental process | Multicellular organismal development | 1.2E-20  | 21.44444 | 27.91811 | 26.4788  | 18.35025 | 11.2654  | 10.71474 | 14.15395 | 20.7684  | 14.0096  | 22.75684 | 16.2458  | 15.6204  | 22.75684 | 16.2458  | 15.6204  | 22.75684 | 16.2458  | 15.6204  | 22.75684 | 16.2458  | 15.6204  | 22.75684 | 16.2458  | 15.6204  | 22.75684 | 16.2458  | 15.6204  |         |
| CUST_26155_P142910886 N53764   | 0.001134 | 24     | 3     |           |                                                                     |                                      | 79.1101  | 210.131  | 131.8938 | 34.424   | 155.1093 | 191.8425 | 117.1089 | 191.7896 | 110.5811 | 124.8573 | 57.3714  | 133.3139 | 131.7095 | 57.7975  | 82.8076  | 75.9217  | 97.30444 | 36.3333  | 61.84039 | 64.0195  | 86.1753  | 177.728  | 120.1692 | 155.5222 | 119.039  | 165.3002 | 74.8853  | 74.0823  |         |
| CUST_13927_P142910886 N32029   | 0.001137 | 24     | 21    |           |                                                                     |                                      | 78.7601  | 71.84394 | 68.84209 | 65.03148 | 64.8536  | 64.65687 | 66.9562  | 63.969   | 63.969   | 63.969   | 63.969   | 63.969   | 63.969   | 63.969   | 63.969   | 63.969   | 63.969   | 63.969   | 63.969   | 63.969   | 63.969   | 63.969   | 63.969   | 63.969   | 63.969   | 63.969   | 63.969   | 63.969   |         |
| CUST_41906_P142910886 N58552   | 0.001139 | 15     | 9     |           |                                                                     |                                      | 66.8886  | 107.0816 | 135.439  | 9.99252  | 29.6283  | 13.83965 | 47.04186 | 10.6806  | 196.874  | 329.7729 | 165.8485 | 18.4567  | 259.439  | 150.5254 | 142.1633 | 139.4964 | 50.1657  | 58.9838  | 59.8395  | 35.756   | 97.46537 | 225.2988 | 198.7685 | NA       | 503.9702 | 121.9563 | 442.892  |          |         |
| CUST_136597_P142910886 N211125 | 0.00114  | 15     | 9     |           |                                                                     |                                      | 136.597  | 136.8075 | 134.5215 | 122.265  | 83.1027  | 103.1076 | 106.1806 | 103.1076 | 106.1806 | 103.1076 | 106.1806 | 103.1076 | 106.1806 | 103.1076 | 106.1806 | 103.1076 | 106.1806 | 103.1076 | 106.1806 | 103.1076 | 106.1806 | 103.1076 | 106.1806 | 103.1076 | 106.1806 | 103.1076 | 106.1806 | 103.1076 |         |
| CUST_40576_P142910886 N54577   | 0.001145 | 24     | 3     |           |                                                                     |                                      | 64.8096  | 133.937  | 98.2609  | 60.2313  | 74.7332  | 79.9843  | 131.0824 | 128.5972 | 129.6809 | 49.48953 | 95.2573  | 124.1787 | 108.8661 | 91.1397  | 149.667  | 82.4451  | 113.9813 | 108.064  | 112.21   | 155.4282 | 110.0883 | 80.9873  | 78.1308  | 85.2343  | 122.432  | 148.052  | 148.052  |          |         |
| CUST_33904_P142910886 N8197    | 0.001146 | 15     | 9     |           |                                                                     |                                      | 116.803  | 71.9755  | 23.2349  | 34.0109  | 82.84904 | 55.78991 | 114.8668 | 26.3389  | 266.3801 | 25.6934  | 272.1926 | 49.2802  | 163.019  | 625.84   | 330.3612 | 99.4422  | 275.5051 | 86.6892  | 182.299  | 148.862  | 129.179  | 120.726  | 122.741  | 49.34012 | 50.967   | 230.0184 | 516.6103 |          |         |
| CUST_34943_P142910886 N11135   | 0.001147 | 21     | 0     |           |                                                                     |                                      | 12.0298  | 28.58875 | 18.22714 | NA       | 11.56997 | 26.088   | 1.84453  | 10.88684 | NA       | 12.483   | 7.657897 | 19.94699 | 12.3847  | 79.1308  | 72.0665  | 10.6615  | 76.8047  | 11.9176  | 43.20994 | NA       |          |         |
| CUST_39028_P142910886 N13635   | 0.001155 | 21     | 3     | 307197955 | hypothetical protein EIL_12947 [Haregnathopsis salti:               |                                      | 7.02E-17 | 41.39866 | 19.08147 | NA       | 71.81768 | 13.22448 | 124.581  | 84.43869 | 69.63319 | 21.56454 | NA       | 79.7929  | NA       | 52.90002 | 16.13881 | 16.57889 | 14.18973 | 64.54893 | 64.26853 | 32.52603 | 40.04725 | 14.77607 | 19.9884  | 55.9438  | NA       | 71.9184  | NA       |          |         |
| CUST_12133_P142910886 N21481   | 0.001156 | 24     | 3     |           |                                                                     |                                      | 45.4633  | 136.1818 | 160.7476 | 155.7278 | 132.247  | 145.673  | 156.7575 | 156.7575 | 156.7575 | 156.7575 | 156.7575 | 156.7575 | 156.7575 | 156.7575 | 156.7575 | 156.7575 | 156.7575 | 156.7575 | 156.7575 | 156.7575 | 156.7575 | 156.7575 | 156.7575 | 156.7575 | 156.7575 | 156.7575 | 156.7575 |          |         |
| CUST_13618_P142910886 N13749   | 0.001157 | 24     | 3     |           |                                                                     |                                      | 38.0762  | 48.9208  | 61.9706  | 29.81837 | 33.26161 | 22.5441  | 35.9603  | 34.78102 | 10.64364 | 54.08177 | 23.9542  | 47.98542 | 47.98542 | 47.98542 | 47.98542 | 47.98542 | 47.98542 | 47.98542 | 47.98542 | 47.98542 | 47.98542 | 47.98542 | 47.98542 | 47.98542 | 47.98542 | 47.98542 | 47.98542 |          |         |
| CUST_43807_P142910886 N64303   | 0.00116  | 15     | 9     |           |                                                                     |                                      | 61.1047  | 147.211  | 265.340  | 26.87538 | 49.79836 | 50.2359  | 50.3693  | 280.165  | 210.3675 | 145.5293 | 322.9938 | 68.4302  | 408.5798 | 267.9382 | 134.1249 | 126.1948 | 110.1142 | 13.7424  | 19.9884  | 55.9438  | 102.1624 | 47.194   | 27.9866  | 426.5023 | 420.1077 | 69.2365  | 69.2365  |          |         |
| CUST_28210_P142910886 N57660   | 0.00116  | 15     | 9     |           |                                                                     |                                      | 31.19093 | 41.2518  | 343.303  | 33.57967 | 17.77043 | 23.88272 | 33.68931 | 30.00897 | 52.34805 | 56.32248 | 40.71531 | 54.40089 | 41.91362 | 38.4845  | 49.48526 | 51.09668 | 35.62474 | 35.4508  | 51.28005 | 35.52135 | 33.7149  | 52.44489 | 41.94819 | 29.88865 | 71.9024  | 58.5117  | 47.9936  |          |         |
| CUST_33205_P142910886 N6266    | 0.001162 | 21     | 3     |           |                                                                     |                                      | 20.9774  | 70.4294  | 196.252  | 221.425  | 299.964  | 247.805  | 223.377  | 223.377  | 223.377  | 223.377  | 223.377  | 223.377  | 223.377  | 223.377  | 223.377  | 223.377  | 223.377  | 223.377  | 223.377  | 223.377  | 223.377  | 223.377  | 223.377  | 223.377  | 223.377  | 223.377  | 223.377  |          |         |
| CUST_2813_P142910886 N21481    | 0.001163 | 24     | 3     |           |                                                                     |                                      | 370.4877 | 341.396  | 371.898  | 181.8229 | 256.1518 | 346.965  | 346.965  | 346.965  | 346.965  | 346.965  | 346.965  | 346.965  | 346.965  | 346.965  | 346.965  | 346.965  | 346.965  | 346.965  | 346.965  | 346.965  | 346.965  | 346.965  | 346.965  | 346.965  | 346.965  | 346.965  | 346.965  |          |         |
| CUST_3175_P142910886 N894      | 0.001162 | 15     | 3     |           |                                                                     |                                      | 437.1883 | 464.7032 | 480.502  | 440.897  | 484.448  | 650.0167 | 604.989  | 335.8595 | 12.166   | 350.314  | 63.0865  | 346.8405 | 248.5801 | 231.4446 | 265.1377 | 332.979  | 317.843  | 499.2194 | 398.677  | 398.677  | 398.677  | 398.677  | 398.677  | 398.677  | 398.677  | 398.677  | 398.677  |          |         |
| CUST_24839_P142910886 N51339   | 0.001168 | 18     |       |           | Protein metabolism                                                  | Proteolysis                          | 120.1291 | 346.965  | 154.4752 | 158.5396 | 113.0325 | 117.67   | 354.4714 | 158.0318 | 133.6383 | 162.6328 | 113.2721 | 183.4397 | 134.7403 | 155.4058 | 131.7403 | 155.4058 | 131.7403 | 155.4058 | 131.7403 | 155.4058 | 131.7403 | 155.4058 | 131.7403 | 155.4058 | 131.7403 | 155.4058 | 131.7403 | 155.4058 |         |
| CUST_42287_P142910886 N59909   | 0.001173 | 24     | 18    |           |                                                                     |                                      | 120.988  | 10.40723 | 13.4429  | 6.83212  | 2.682328 | 15.0945  | 6.093288 | NA       | 7.96872  | 8.27779  | 7.917706 | 8.17917  | 4.47373  | 8.137781 | 10.40582 | 11.8828  | 8.337419 | 8.720868 | 36.8717  | 35.0086  | NA       | 8.255312 | NA       | 11.01284 | 24.38855 | 68.0791  | 10.53048 |          |         |
| CUST_50709_P142910886 N80724   | 0.001174 | 15     | 9     |           |                                                                     |                                      | 45.84492 | 101.6948 | 80.8662  | 36.29774 | 80.8362  | 58.00108 | 45.2397  | 41.64943 | 35.5513  | 52.19555 | 55.16575 | 87.4157  | 41.83694 | 61.8077  | 78.18959 | 74.71666 | 78.7536  | 93.15487 | 39.477   | 44.66782 | 56.1568  | 42.0687  | 35.5157  | 40.9922  | 90.8563  | 46.0226  | 54.7312  |          |         |
| CUST_12312_P142910886 N2686    | 0.001178 | 12     | 3     |           |                                                                     |                                      | 43.45905 | 38.3355  | 58.7731  | 71.63476 | 115.1617 | 210.0071 | 191.1902 | 82.7006  | 60.6453  | 25.5078  | 35.555   | 101.0263 | 44.6026  | 38.384   | 58.7731  | 58.62811 | 171.708  | 158.7737 | 74.9572  | 70.92416 | 47.2714  | 27.5278  | 10.7488  | 77.4635  | 71.122   | 86.2059  |          |          |         |
| CUST_43807_P142910886 N64303   | 0.001178 | 15     | 9     |           |                                                                     |                                      | 61.1047  | 147.211  | 265.340  | 26.87538 | 49.79836 | 50.2359  | 50.3693  | 280.165  | 210.3675 | 145.5293 | 322.9938 | 68.4302  | 408.5798 | 267.9382 | 134.1249 | 126.1948 | 110.1142 | 13.7424  | 19.9884  | 55.9438  | 102.1624 | 47.194   | 27.9866  | 426.5023 | 420.1077 | 69.2365  | 69.2365  |          |         |
| CUST_28210_P142910886 N57660   | 0.00116  | 15     | 9     |           |                                                                     |                                      | 31.19093 | 41.2518  | 343.303  | 33.57967 | 17.77043 | 23.88272 | 33.68931 | 30.00897 | 52.34805 | 56.32248 | 40.71531 | 54.40089 | 41.91362 | 38.4845  | 49.48526 | 51.09668 | 35.62474 | 35.4508  | 51.28005 | 35.52135 | 33.7149  | 52.44489 | 41.94819 | 29.88865 | 71.9024  | 58.5117  | 47.9936  |          |         |
| CUST_33205_P142910886 N6266    | 0.001162 | 21     | 3     |           |                                                                     |                                      | 20.9774  | 70.4294  | 196.252  | 221.425  | 299.964  | 247.805  | 223.377  | 223.377  | 223.377  | 223.377  | 223.377  | 223.377  | 223.377  | 223.377  | 223.377  | 223.377  | 223.377  | 223.377  | 223.377  | 223.377  | 223.377  | 223.377  | 223.377  | 223.377  | 223.377  | 223.377  | 223.377  |          |         |
| CUST_2813_P142910886 N21481    | 0.001163 | 24     | 3     |           |                                                                     |                                      | 370.4877 | 341.396  | 371.898  | 181.8229 | 256.1518 | 346.965  | 346.965  | 346.965  | 346.965  | 346.965  | 346.965  | 346.965  | 346.965  | 346.965  | 346.965  | 346.965  | 346.965  | 346.965  | 346.965  | 346.965  | 346.965  | 346.965  | 346.965  | 346.965  | 346.965  | 346.965  | 346.965  |          |         |
| CUST_3175_P142910886 N894      | 0.001162 | 15     | 3     |           |                                                                     |                                      | 437.1883 | 464.7032 | 480.502  | 440.897  | 484.448  | 650.0167 | 604.989  | 335.8595 | 12.166   | 350.314  | 63.0865  | 346.8405 | 248.5801 | 231.4446 | 265.1377 | 332.979  | 317.843  | 499.2194 | 398.677  | 398.677  | 398.677  | 398.677  | 398.677  | 398.677  | 398.677  | 398.677  |          |          |         |
| CUST_24839_P142910886 N51339   | 0.001168 | 18     |       |           | Protein metabolism                                                  | Proteolysis                          | 120.1291 | 346.965  | 154.4752 | 158.5396 | 113.0325 | 117.67   | 354.4714 | 158.0318 | 133.6383 | 162.6328 | 113.2721 | 183.4397 | 134.7403 | 155.4058 | 131.7403 | 155.4058 | 131.7403 | 155.4058 | 131.7403 | 155.4058 | 131.7403 | 155.4058 | 131.7403 | 155.4058 | 131.7403 | 155.4058 | 131.7403 | 155.4058 |         |
| CUST_42287_P142910886 N59909   | 0.001173 | 24     | 18    |           |                                                                     |                                      | 120.988  | 10.40723 | 13.4429  | 6.83212  | 2.682328 | 15.0945  | 6.093288 | NA       | 7.96872  | 8.27779  | 7.917706 | 8.17917  | 4.47373  | 8.13     |          |          |          |          |          |          |          |          |          |          |          |          |          |          |         |











| Probe ID              | ID      | p-value  | Period | Phase | EBI ID    | Annotation                                                             | GO category | Go term  | E-value  | 0        | 1        | 2        | 3        | 4        | 5        | 6        | 7        | 8        | 9        | 10       | 11       | 12       | 13       | 14       | 15       | 16       | 17       | 18       | 19       | 20       | 21       | 22       | 23       | 24       | 25       |          |
|-----------------------|---------|----------|--------|-------|-----------|------------------------------------------------------------------------|-------------|----------|----------|----------|----------|----------|----------|----------|----------|----------|----------|----------|----------|----------|----------|----------|----------|----------|----------|----------|----------|----------|----------|----------|----------|----------|----------|----------|----------|----------|
| CUST_34217_P142910886 | M9087   | 0.003824 | 12     | 9     | 321478511 | hypothetical protein DAPDUPA0R4_40294 [Daphnia pulex]                  |             |          | 3.17E-20 | 15.19324 | 11.98928 | 10.03096 | 6.022117 | 6.189473 | 8.35225  | 10.85593 | 11.89729 | 11.25374 | 18.74861 | 14.60539 | 13.11518 | 11.91408 | 14.58399 | NA       | 13.34557 | 22.27295 | 17.37373 | 15.12292 | 15.26818 | 15.07172 | 21.3229  | NA       | 16.01839 | 28.37808 | 10.3097  | 14.59936 |
| CUST_312_P142910886   | N3803   | 0.003827 | 12     | 9     | 49719637  | 4.795846                                                               | 3489275     | 128844   | 12465    | 11       | 15537    | 42       | 160524   | 704724   | 49.6748  | 16699    | NA       | 18.68974 | 18.74288 | 7.424883 | 7.637236 | 207119   | 17.273   | 8.9841   | NA       | 19.54187 | NA       | 21.01169 | 26.7835  | 9.825709 | 11.22    | 5991     | 6.43374  |          |          |          |
| CUST_43971_P142910886 | M45050  | 0.003829 | 24     | 9     | 5794991   | NA                                                                     | 333826      | 540372   | 5.449318 | 8.334073 | 5.40892  | 10.18836 | 5.76034  | 8.14058  | 16.10718 | NA       | 19.18487 | 19.90248 | 22.8802  | 12.7372  | 16.9768  | 6.283437 | 93.9641  | 11.91289 | 16.86994 | NA       | 24.2301  | 6.54554  | 13.0448  | 15.98933 | 14.59234 | 15.91411 |          |          |          |          |
| CUST_31805_P142910886 | N14211  | 0.00383  | 12     | 9     | 12144957  | 6.57822                                                                | 11.39232    | 9.53739  | 11.58179 | NA       | 17.95719 | 12.253   | 13.7661  | 16.3724  | 12.5688  | 16.2453  | 8.10607  | 13.7661  | 16.3724  | 12.5688  | 16.2453  | 8.10607  | 13.7661  | 16.3724  | 12.5688  | 16.2453  | 8.10607  | 13.7661  | 16.3724  | 12.5688  | 16.2453  | 8.10607  | 13.7661  | 16.3724  | 12.5688  |          |
| CUST_43647_P142910886 | M63576  | 0.003829 | 24     | 0     | 1319126   | 154.7047                                                               | 17.60053    | 18.40068 | 14.6157  | 134.9686 | 120.319  | 135.196  | 136.969  | 130.2384 | 114.9009 | 109.4596 | 121.6208 | 15.802   | 14.7669  | 16.4529  | 13.9734  | 11.3359  | 20.4829  | 15.7107  | 15.9327  | 14.4573  | 15.9787  | 18.0739  | 15.4568  | 15.5465  | 14.9734  | 14.9734  | 14.9734  | 14.9734  |          |          |
| CUST_54228_P142910886 | M105185 | 0.003835 | 21     | 0     | 52725475  | PREDICTED: E3 ubiquitin-protein ligase UBRI4 [Melo protein metabolism] |             |          | 1.63E-22 | 15.99252 | 15.48243 | 15.7605  | 6.47359  | 57.1457  | 46.8688  | 48.55604 | 37.90169 | 38.1373  | 47.6217  | 41.4641  | 51.5024  | 35.2453  | 35.2638  | 50.3431  | 36.2759  | 50.3431  | 36.2759  | 50.3431  | 36.2759  | 50.3431  | 36.2759  | 50.3431  | 36.2759  | 50.3431  | 36.2759  |          |
| CUST_4801_P142910886  | M67043  | 0.003847 | 15     | 9     | 4742784   | 870373                                                                 | 7.862005    | NA       | 6.300421 | 3.582315 | 6.289924 | NA       | 15.7374  | 6.246892 | NA       | 10.45059 | 9.71389  | NA       | 11.2393  | 9.71389  | NA       | 11.2393  | 9.71389  | NA       | 7.51416  | 6.256599 | 4.49901  | 5.23744  | 17.64462 | 6.23088  | NA       | 13.71667 | 19.127   | 10.12652 |          |          |
| CUST_4801_P142910886  | M67043  | 0.003847 | 15     | 9     | 91.23332  | 127.6613                                                               | 130.1869    | 98.9613  | 100.1156 | 180.715  | 180.715  | 180.715  | 180.715  | 180.715  | 180.715  | 180.715  | 180.715  | 180.715  | 180.715  | 180.715  | 180.715  | 180.715  | 180.715  | 180.715  | 180.715  | 180.715  | 180.715  | 180.715  | 180.715  | 180.715  | 180.715  | 180.715  | 180.715  | 180.715  |          |          |
| CUST_30163_P142910886 | N61303  | 0.003858 | 12     | 9     | 321475863 | hypothetical protein DAPDUPA0R4_307810 [Daphnia protein metabolism]    |             |          | 1.56E-20 | 14.21203 | 10.31071 | 4.27509  | 9.94487  | 35.9016  | 16.73741 | 6.49073  | 42.9535  | 42.9535  | 42.9535  | 42.9535  | 42.9535  | 42.9535  | 42.9535  | 42.9535  | 42.9535  | 42.9535  | 42.9535  | 42.9535  | 42.9535  | 42.9535  | 42.9535  | 42.9535  | 42.9535  | 42.9535  | 42.9535  |          |
| CUST_21403_P142910886 | N45154  | 0.003866 | 12     | 9     | 33468738  | calcification-associated peptide-1 [Procambarus ca.]                   |             |          | 8.53E-19 | 347.2399 | 17.66078 | 16.7601  | 21.1193  | 34.0701  | 11       | 336.115  | 219.062  | 21       | 7415.798 | 6.84078  | 6.338807 | 16.2155  | 18.38    | NA       | 22.23121 | 1.855673 | 2.8160   | NA       | 27.088   | 5.61462  | 9448.983 | 9611.158 | 11.595   | 11.95959 | NA       |          |
| CUST_11351_P142910886 | N27672  | 0.003867 | 21     | 15    | 20.40111  | 23.8579                                                                | 25.2574     | 23.151   | 13.85759 | 27.56643 | 18.1     | 15.3774  | 8.6034   | 12.3786  | 13.1125  | 18.94867 | 18.15323 | 16.3806  | 11.2315  | 24.0125  | 24.0125  | 24.0125  | 24.0125  | 24.0125  | 24.0125  | 24.0125  | 24.0125  | 24.0125  | 24.0125  | 24.0125  | 24.0125  | 24.0125  | 24.0125  | 24.0125  |          |          |
| CUST_22061_P142910886 | N43531  | 0.003868 | 24     | 3     | 391334387 | PREDICTED: ephrin-B1-like [Metasulcus occidentalis]                    |             |          | 4.89E-22 | 17.95402 | 20.63276 | 20.73391 | 47.14504 | 14.24656 | 36.75151 | 18.7774  | 19.94584 | 18.7748  | 22.94537 | 42.11882 | 18.8554  | 5.42942  | 18.4947  | 7.986139 | 6.086228 | 7.06317  | 7.83894  | 6.68108  | 5.661008 | 12.7904  | 20.0426  | 15.98417 | 19.93091 | 21.761   | 11.28356 |          |
| CUST_49707_P142910886 | N43531  | 0.003868 | 24     | 3     | 391334387 | PREDICTED: ephrin-B1-like [Metasulcus occidentalis]                    |             |          | 4.89E-22 | 17.95402 | 20.63276 | 20.73391 | 47.14504 | 14.24656 | 36.75151 | 18.7774  | 19.94584 | 18.7748  | 22.94537 | 42.11882 | 18.8554  | 5.42942  | 18.4947  | 7.986139 | 6.086228 | 7.06317  | 7.83894  | 6.68108  | 5.661008 | 12.7904  | 20.0426  | 15.98417 | 19.93091 | 21.761   | 11.28356 |          |
| CUST_30163_P142910886 | N61303  | 0.003858 | 12     | 9     | 321475863 | hypothetical protein DAPDUPA0R4_307810 [Daphnia protein metabolism]    |             |          | 1.56E-20 | 14.21203 | 10.31071 | 4.27509  | 9.94487  | 35.9016  | 16.73741 | 6.49073  | 42.9535  | 42.9535  | 42.9535  | 42.9535  | 42.9535  | 42.9535  | 42.9535  | 42.9535  | 42.9535  | 42.9535  | 42.9535  | 42.9535  | 42.9535  | 42.9535  | 42.9535  | 42.9535  | 42.9535  | 42.9535  | 42.9535  |          |
| CUST_21403_P142910886 | N45154  | 0.003866 | 12     | 9     | 33468738  | calcification-associated peptide-1 [Procambarus ca.]                   |             |          | 8.53E-19 | 347.2399 | 17.66078 | 16.7601  | 21.1193  | 34.0701  | 11       | 336.115  | 219.062  | 21       | 7415.798 | 6.84078  | 6.338807 | 16.2155  | 18.38    | NA       | 22.23121 | 1.855673 | 2.8160   | NA       | 27.088   | 5.61462  | 9448.983 | 9611.158 | 11.595   | 11.95959 | NA       |          |
| CUST_11351_P142910886 | N27672  | 0.003867 | 21     | 15    | 20.40111  | 23.8579                                                                | 25.2574     | 23.151   | 13.85759 | 27.56643 | 18.1     | 15.3774  | 8.6034   | 12.3786  | 13.1125  | 18.94867 | 18.15323 | 16.3806  | 11.2315  | 24.0125  | 24.0125  | 24.0125  | 24.0125  | 24.0125  | 24.0125  | 24.0125  | 24.0125  | 24.0125  | 24.0125  | 24.0125  | 24.0125  | 24.0125  | 24.0125  | 24.0125  | 24.0125  |          |
| CUST_22061_P142910886 | N43531  | 0.003868 | 24     | 3     | 391334387 | PREDICTED: ephrin-B1-like [Metasulcus occidentalis]                    |             |          | 4.89E-22 | 17.95402 | 20.63276 | 20.73391 | 47.14504 | 14.24656 | 36.75151 | 18.7774  | 19.94584 | 18.7748  | 22.94537 | 42.11882 | 18.8554  | 5.42942  | 18.4947  | 7.986139 | 6.086228 | 7.06317  | 7.83894  | 6.68108  | 5.661008 | 12.7904  | 20.0426  | 15.98417 | 19.93091 | 21.761   | 11.28356 |          |
| CUST_49707_P142910886 | N43531  | 0.003868 | 24     | 3     | 391334387 | PREDICTED: ephrin-B1-like [Metasulcus occidentalis]                    |             |          | 4.89E-22 | 17.95402 | 20.63276 | 20.73391 | 47.14504 | 14.24656 | 36.75151 | 18.7774  | 19.94584 | 18.7748  | 22.94537 | 42.11882 | 18.8554  | 5.42942  | 18.4947  | 7.986139 | 6.086228 | 7.06317  | 7.83894  | 6.68108  | 5.661008 | 12.7904  | 20.0426  | 15.98417 | 19.93091 | 21.761   | 11.28356 |          |
| CUST_30163_P142910886 | N61303  | 0.003858 | 12     | 9     | 321475863 | hypothetical protein DAPDUPA0R4_307810 [Daphnia protein metabolism]    |             |          | 1.56E-20 | 14.21203 | 10.31071 | 4.27509  | 9.94487  | 35.9016  | 16.73741 | 6.49073  | 42.9535  | 42.9535  | 42.9535  | 42.9535  | 42.9535  | 42.9535  | 42.9535  | 42.9535  | 42.9535  | 42.9535  | 42.9535  | 42.9535  | 42.9535  | 42.9535  | 42.9535  | 42.9535  | 42.9535  | 42.9535  | 42.9535  |          |
| CUST_21403_P142910886 | N45154  | 0.003866 | 12     | 9     | 33468738  | calcification-associated peptide-1 [Procambarus ca.]                   |             |          | 8.53E-19 | 347.2399 | 17.66078 | 16.7601  | 21.1193  | 34.0701  | 11       | 336.115  | 219.062  | 21       | 7415.798 | 6.84078  | 6.338807 | 16.2155  | 18.38    | NA       | 22.23121 | 1.855673 | 2.8160   | NA       | 27.088   | 5.61462  | 9448.983 | 9611.158 | 11.595   | 11.95959 | NA       |          |
| CUST_11351_P142910886 | N27672  | 0.003867 | 21     | 15    | 20.40111  | 23.8579                                                                | 25.2574     | 23.151   | 13.85759 | 27.56643 | 18.1     | 15.3774  | 8.6034   | 12.3786  | 13.1125  | 18.94867 | 18.15323 | 16.3806  | 11.2315  | 24.0125  | 24.0125  | 24.0125  | 24.0125  | 24.0125  | 24.0125  | 24.0125  | 24.0125  | 24.0125  | 24.0125  | 24.0125  | 24.0125  | 24.0125  | 24.0125  | 24.0125  | 24.0125  |          |
| CUST_22061_P142910886 | N43531  | 0.003868 | 24     | 3     | 391334387 | PREDICTED: ephrin-B1-like [Metasulcus occidentalis]                    |             |          | 4.89E-22 | 17.95402 | 20.63276 | 20.73391 | 47.14504 | 14.24656 | 36.75151 | 18.7774  | 19.94584 | 18.7748  | 22.94537 | 42.11882 | 18.8554  | 5.42942  | 18.4947  | 7.986139 | 6.086228 | 7.06317  | 7.83894  | 6.68108  | 5.661008 | 12.7904  | 20.0426  | 15.98417 | 19.93091 | 21.761   | 11.28356 |          |
| CUST_49707_P142910886 | N43531  | 0.003868 | 24     | 3     | 391334387 | PREDICTED: ephrin-B1-like [Metasulcus occidentalis]                    |             |          | 4.89E-22 | 17.95402 | 20.63276 | 20.73391 | 47.14504 | 14.24656 | 36.75151 | 18.7774  | 19.94584 | 18.7748  | 22.94537 | 42.11882 | 18.8554  | 5.42942  | 18.4947  | 7.986139 | 6.086228 | 7.06317  | 7.83894  | 6.68108  | 5.661008 | 12.7904  | 20.0426  | 15.98417 | 19.93091 | 21.761   | 11.28356 |          |
| CUST_30163_P142910886 | N61303  | 0.003858 | 12     | 9     | 321475863 | hypothetical protein DAPDUPA0R4_307810 [Daphnia protein metabolism]    |             |          | 1.56E-20 | 14.21203 | 10.31071 | 4.27509  | 9.94487  | 35.9016  | 16.73741 | 6.49073  | 42.9535  | 42.9535  | 42.9535  | 42.9535  | 42.9535  | 42.9535  | 42.9535  | 42.9535  | 42.9535  | 42.9535  | 42.9535  | 42.9535  | 42.9535  | 42.9535  | 42.9535  | 42.9535  | 42.9535  | 42.9535  | 42.9535  |          |
| CUST_21403_P142910886 | N45154  | 0.003866 | 12     | 9     | 33468738  | calcification-associated peptide-1 [Procambarus ca.]                   |             |          | 8.53E-19 | 347.2399 | 17.66078 | 16.7601  | 21.1193  | 34.0701  | 11       | 336.115  | 219.062  | 21       | 7415.798 | 6.84078  | 6.338807 | 16.2155  | 18.38    | NA       | 22.23121 | 1.855673 | 2.8160   | NA       | 27.088   | 5.61462  | 9448.983 | 9611.158 | 11.595   | 11.95959 | NA       |          |
| CUST_11351_P142910886 | N27672  | 0.003867 | 21     | 15    | 20.40111  | 23.8579                                                                | 25.2574     | 23.151   | 13.85759 | 27.56643 | 18.1     | 15.3774  | 8.6034   | 12.3786  | 13.1125  | 18.94867 | 18.15323 | 16.3806  | 11.2315  | 24.0125  | 24.0125  | 24.0125  | 24.0125  | 24.0125  | 24.0125  | 24.0125  | 24.0125  | 24.0125  | 24.0125  | 24.0125  | 24.0125  | 24.0125  | 24.0125  | 24.0125  | 24.0125  |          |
| CUST_22061_P142910886 | N43531  | 0.003868 | 24     | 3     | 391334387 | PREDICTED: ephrin-B1-like [Metasulcus occidentalis]                    |             |          | 4.89E-22 | 17.95402 | 20.63276 | 20.73391 | 47.14504 | 14.24656 | 36.75151 | 18.7774  | 19.94584 | 18.7748  | 22.94537 | 42.11882 | 18.8554  | 5.42942  | 18.4947  | 7.986139 | 6.086228 | 7.06317  | 7.83894  | 6.68108  | 5.661008 | 12.7904  | 20.0426  | 15.98417 | 19.93091 | 21.761   | 11.28356 |          |
| CUST_49707_P142910886 | N43531  | 0.003868 | 24     | 3     | 391334387 | PREDICTED: ephrin-B1-like [Metasulcus occidentalis]                    |             |          | 4.89E-22 | 17.95402 | 20.63276 | 20.73391 | 47.14504 | 14.24656 | 36.75151 | 18.7774  | 19.94584 | 18.7748  | 22.94537 | 42.11882 | 18.8554  | 5.42942  | 18.4947  | 7.986139 | 6.086228 | 7.06317  | 7.83894  | 6.68108  | 5.661008 | 12.7904  | 20.0426  | 15.98417 | 19.93091 | 21.761   | 11.28356 |          |
| CUST_30163_P142910886 | N61303  | 0.003858 | 12     | 9     | 32        |                                                                        |             |          |          |          |          |          |          |          |          |          |          |          |          |          |          |          |          |          |          |          |          |          |          |          |          |          |          |          |          |          |











| Probe ID               | ID      | p-value  | Period | Phase | EBI ID    | Annotation                                                            | GO category | GO term | E-value  | 0         | 1        | 2        | 3        | 4        | 5        | 6        | 7        | 8        | 9        | 10       | 11       | 12       | 13        | 14       | 15       | 16       | 17       | 18       | 19       | 20       | 21       | 22       | 23       | 24       | 25       |          |
|------------------------|---------|----------|--------|-------|-----------|-----------------------------------------------------------------------|-------------|---------|----------|-----------|----------|----------|----------|----------|----------|----------|----------|----------|----------|----------|----------|----------|-----------|----------|----------|----------|----------|----------|----------|----------|----------|----------|----------|----------|----------|----------|
| CUST_32725_P1429010886 | M3684   | 0.007474 | 18     | 3     | 443695741 | hypothetical protein CAPTEDRAFT_168216 [Capitell                      |             |         | 2.8E-62  | 81.444839 | 82.32602 | 67.20366 | 67.40392 | 72.37554 | 66.66489 | 69.77447 | 54.73744 | 49.38887 | 83.34341 | 64.95479 | 74.23222 | 75.90597 | 95.74719  | 98.12169 | 95.44    | 54.12753 | 75.04971 | 71.45222 | 73.82826 | 65.34071 | 110.9726 | 69.2629  | 64.9286  | 73.13314 | 60.04192 | 65.23612 |
| CUST_40975_P1429010886 | M56521  | 0.007476 | 15     | 9     |           |                                                                       |             |         | 10.09197 | 216.4474  | 212.501  | 178.0175 | 293.127  | 172.2644 | 208.138  | 178.147  | 259.6731 | 82.84904 | 232.4315 | 355.9542 | 303.2078 | 324.244  | 222.3674  | 354.2035 | 195.689  | 312.5863 | 277.7397 | 239.3938 | 159.6845 | 215.3368 | 246.9496 | 199.4834 | 50.1617  | 342.0356 | 522.2489 |          |
| CUST_38575_P1429010886 | N19798  | 0.007476 | 15     | 9     |           |                                                                       |             |         | 19.09824 | 74.38443  | 22.92502 | 54.90496 | 59.5052  | 107.9278 | 39.0934  | 46.93963 | 51.57445 | 85.8609  | 57.0474  | 11.955   | 61.9713  | 131.9991 | 64.78484  | 100.397  | 50.28884 | 78.94041 | 41.4835  | 68.86603 | 59.58485 | 85.1015  | 64.88975 | 46.08976 | 69.39137 | 65.62571 | 115.2136 |          |
| CUST_5927_P1429010886  | M7592   | 0.007477 | 18     | 3     |           |                                                                       |             |         | 76.84006 | 135.9618  | 108.1101 | 912.6324 | 71.5641  | 764.0731 | 19.45464 | 4.86086  | 4.68086  | 11.70846 | 76.84006 | 135.9618 | 108.1101 | 912.6324 | 71.5641   | 764.0731 | 19.45464 | 4.86086  | 4.68086  | 11.70846 | 76.84006 | 135.9618 | 108.1101 | 912.6324 | 71.5641  | 764.0731 | 19.45464 | 4.86086  |
| CUST_28051_P1429010886 | N57180  | 0.007478 | 15     | 9     |           |                                                                       |             |         | 1.53E-27 | 30.38651  | 128.8011 | 23.16574 | 4.597228 | 23.97181 | 16.3435  | 24.26769 | 20.34669 | 34.76682 | 6.554244 | 14.73561 | 15.46694 | 11.47303 | NA        | 18.15924 | 29.10242 | 24.32739 | 38.20891 | 19.29325 | 26.17436 | 18.12517 | 13.3761  | NA       | 9.343228 | 13.40566 | 14.33928 | 14.34328 |
| CUST_52516_P1429010886 | M99417  | 0.007485 | 24     | 18    |           |                                                                       |             |         | 90.25676 | 91.23232  | 190.7307 | 70.4786  | 68.48249 | 96.80182 | 85.89616 | 61.08317 | 79.97877 | 87.87096 | 71.49639 | 76.58625 | 67.802   | 178.831  | 125.527   | 170.7046 | 80.21099 | 100.3882 | 76.56277 | 127.1713 | 93.98154 | 150.0225 | 91.05924 | 18.19178 | 44.94749 | 84.96243 |          |          |
| CUST_31528_P1429010886 | M1725   | 0.007501 | 15     | 9     |           |                                                                       |             |         | 16.14564 | 211.5235  | 204.8478 | 154.793  | 205.953  | 126.6373 | 137.5651 | 131.2903 | 141.2031 | 74.667   | 212.7113 | 241.638  | 186.9387 | 185.359  | 191.7977  | 289.3248 | 195.958  | 240.9049 | 181.7853 | 277.0077 | 187.1216 | 241.9211 | 161.809  | 135.4102 | 91.6146  | 148.38   | 180.0435 |          |
| CUST_31528_P1429010886 | N25785  | 0.007501 | 15     | 9     |           |                                                                       |             |         | 819.4278 | 860.0106  | 860.0106 | 860.0106 | 860.0106 | 860.0106 | 860.0106 | 860.0106 | 860.0106 | 860.0106 | 860.0106 | 860.0106 | 860.0106 | 860.0106 | 860.0106  | 860.0106 | 860.0106 | 860.0106 | 860.0106 | 860.0106 | 860.0106 | 860.0106 | 860.0106 | 860.0106 | 860.0106 | 860.0106 | 860.0106 |          |
| CUST_53020_P1429010886 | N99783  | 0.007513 | 18     | 3     | 321453851 | putative TGF-beta receptor type I bapoon protein [Signal transduction |             |         | 4.59E-14 | 12.14089  | 111.6278 | 48.4448  | 179.678  | 155.2583 | 126.5717 | 71.25659 | 68.81509 | 52.60928 | 57.75699 | 71.25659 | 68.81509 | 52.60928 | 57.75699  | 71.25659 | 68.81509 | 52.60928 | 57.75699 | 71.25659 | 68.81509 | 52.60928 | 57.75699 | 71.25659 | 68.81509 | 52.60928 | 57.75699 |          |
| CUST_20234_P1429010886 | N43069  | 0.007517 | 24     | 21    |           |                                                                       |             |         | 9.427695 | 16.1915   | 16.67239 | 6.693409 | 5.931156 | 8.972448 | 5.711785 | 8.319795 | NA       | 5.900401 | 12.55563 | 15.4943  | 6.271198 | NA       | 4.896964  | 8.176012 | 12.43952 | 9.496518 | 11.01558 | 8.437018 | 10.5756  | 19.66703 | 14.03672 | 16.5731  | NA       | 16.28596 | 13.64952 |          |
| CUST_19737_P1429010886 | N42166  | 0.007517 | 24     | 21    |           |                                                                       |             |         | 34.18999 | 36.16119  | NA       | 68.1165  | 21.07071 | 27.84642 | 59.19392 | 11.51059 | 45.65948 | 9.47114  | 6.531314 | NA       | 9.718799 | 12.03892 | 26.39237  | 39.78055 | 20.38984 | 31.98623 | 20.89589 | 14.96558 | 11.01558 | 16.58396 | NA       | 8.09761  | 8.402814 | 6.546282 | 10.64967 |          |
| CUST_53580_P1429010886 | N102352 | 0.007517 | 24     | 21    |           |                                                                       |             |         | 38.73964 | 24.45089  | 35.18679 | 21.41937 | 29.72539 | 10.31037 | 34.14561 | 26.14713 | 16.13867 | 45.38957 | 37.6662  | 25.5511  | 30.12445 | 20.76077 | 29.75766  | 27.0492  | 39.54839 | 40.71331 | 15.4514  | 39.54839 | 40.71331 | 15.4514  | 39.54839 | 40.71331 | 15.4514  | 39.54839 | 40.71331 |          |
| CUST_7273_P1429010886  | N12114  | 0.007533 | 21     | 9     | 383836569 | PREDICTED: kinase-like protein NF21A-like isoform                     |             |         | 6.7E-11  | 55.515    | 42.752   | 187.5959 | 159.1878 | 144.657  | 144.657  | 144.657  | 144.657  | 144.657  | 144.657  | 144.657  | 144.657  | 144.657  | 144.657   | 144.657  | 144.657  | 144.657  | 144.657  | 144.657  | 144.657  | 144.657  | 144.657  | 144.657  | 144.657  | 144.657  | 144.657  |          |
| CUST_7273_P1429010886  | N12114  | 0.007533 | 21     | 9     | 321436784 | hypothetical protein DAPDUPRAFT_39395 [Daphnia                        |             |         | 1.37E-21 | 37.32094  | 61.45498 | 16.51899 | 65.00414 | 55.87064 | 64.56532 | 62.3113  | 68.86603 | 60.98651 | 81.18707 | 76.6626  | 75.5107  | 78.7593  | 78.7593   | 78.7593  | 78.7593  | 78.7593  | 78.7593  | 78.7593  | 78.7593  | 78.7593  | 78.7593  | 78.7593  | 78.7593  | 78.7593  | 78.7593  |          |
| CUST_43673_P1429010886 | M63643  | 0.007539 | 21     | 3     | 409595759 | Reelin [Crossostoma gigas]                                            |             |         | 3.38E-47 | 89.5114   | 47.48253 | 23.14868 | 19.245   | 88.95458 | 89.37758 | 12.66232 | 60.69824 | 128.0672 | 41.29441 | 48.24025 | 35.30186 | 19.245   | 88.95458  | 89.37758 | 12.66232 | 60.69824 | 128.0672 | 41.29441 | 48.24025 | 35.30186 | 19.245   | 88.95458 | 89.37758 | 12.66232 | 60.69824 |          |
| CUST_18172_P1429010886 | N39285  | 0.007545 | 21     | 3     |           |                                                                       |             |         | 24.8521  | 63.86107  | 34.589   | 77.845   | 91.369   | 29.40154 | 29.40154 | 29.40154 | 29.40154 | 29.40154 | 29.40154 | 29.40154 | 29.40154 | 29.40154 | 29.40154  | 29.40154 | 29.40154 | 29.40154 | 29.40154 | 29.40154 | 29.40154 | 29.40154 | 29.40154 | 29.40154 | 29.40154 | 29.40154 |          |          |
| CUST_43673_P1429010886 | M75923  | 0.007546 | 15     | 9     |           |                                                                       |             |         | 9.391276 | 24.78037  | 16.04286 | 14.35419 | 13.57654 | 16.99403 | 14.20484 | 16.40935 | 16.23122 | 26.05952 | 19.32315 | 28.91522 | 16.7016  | 19.32315 | 28.91522  | 16.7016  | 19.32315 | 28.91522 | 16.7016  | 19.32315 | 28.91522 | 16.7016  | 19.32315 | 28.91522 | 16.7016  | 19.32315 | 28.91522 |          |
| CUST_46158_P1429010886 | M71597  | 0.007548 | 15     | 9     |           |                                                                       |             |         | 10.00344 | 26.09513  | 14.43879 | 9.920773 | 15.1541  | 13.7551  | 14.59454 | 14.86086 | 4.68086  | 11.70846 | 76.84006 | 135.9618 | 108.1101 | 912.6324 | 71.5641   | 764.0731 | 19.45464 | 4.86086  | 4.68086  | 11.70846 | 76.84006 | 135.9618 | 108.1101 | 912.6324 | 71.5641  | 764.0731 | 19.45464 |          |
| CUST_53089_P1429010886 | N100006 | 0.00755  | 18     | 0     | 321460146 | hypothetical protein DAPDUPRAFT_39395 [Daphnia                        |             |         | 1.32E-42 | 51.49762  | 56.18196 | 33.97686 | 28.0171  | 37.52322 | 37.52322 | 37.52322 | 37.52322 | 37.52322 | 37.52322 | 37.52322 | 37.52322 | 37.52322 | 37.52322  | 37.52322 | 37.52322 | 37.52322 | 37.52322 | 37.52322 | 37.52322 | 37.52322 | 37.52322 | 37.52322 | 37.52322 | 37.52322 | 37.52322 |          |
| CUST_56172_P1429010886 | N113022 | 0.007556 | 21     | 0     |           |                                                                       |             |         | 15.4643  | 9.163319  | 15.7796  | 13.2633  | 4.03847  | 12.13343 | 14.0705  | 11.74252 | 12.99803 | 9.011589 | 47.2981  | 37.90494 | 16.42058 | 10.48808 | 4.49448   | 13.81212 | 16.42058 | 10.48808 | 4.49448  | 13.81212 | 16.42058 | 10.48808 | 4.49448  | 13.81212 | 16.42058 | 10.48808 | 4.49448  |          |
| CUST_32417_P1429010886 | M4069   | 0.007557 | 12     | 0     |           |                                                                       |             |         | 29.18761 | 30.762    | 36.5533  | 14.04228 | 20.1049  | 16.37204 | 11.4368  | 17.12833 | 16.7308  | 25.70084 | 18.01506 | 26.05497 | 27.64875 | 13.84585 | 18.01506  | 26.05497 | 27.64875 | 13.84585 | 18.01506 | 26.05497 | 27.64875 | 13.84585 | 18.01506 | 26.05497 | 27.64875 | 13.84585 | 18.01506 |          |
| CUST_42929_P1429010886 | M88616  | 0.007559 | 24     | 21    |           |                                                                       |             |         | 98.98757 | 76.21004  | 63.0163  | 63.2408  | 63.2408  | 63.2408  | 63.2408  | 63.2408  | 63.2408  | 63.2408  | 63.2408  | 63.2408  | 63.2408  | 63.2408  | 63.2408   | 63.2408  | 63.2408  | 63.2408  | 63.2408  | 63.2408  | 63.2408  | 63.2408  | 63.2408  | 63.2408  | 63.2408  | 63.2408  |          |          |
| CUST_11557_P1429010886 | N26869  | 0.007563 | 18     | 3     |           |                                                                       |             |         | 58.94983 | 40.74811  | 75.61377 | 95.04098 | 60.67776 | 84.7269  | 104.0078 | 80.7715  | 61.7428  | 43.7443  | 37.1440  | 17.71053 | 70.3773  | 69.83556 | 55.9068   | 61.4025  | 52.40185 | 10.112   | 77.17753 | 10.37733 | 15.2532  | 83.93175 | 138.4032 | 124.1661 | 32.0701  | 42.8003  | 48.5992  |          |
| CUST_3799_P1429010886  | M22508  | 0.007564 | 15     | 12    | 159078854 | serine protease [Peneaus monodon]                                     |             |         | 1.69E-42 | 121.887   | 134.604  | 135.1148 | 111.9369 | 85.8158  | 178.4538 | 147.7383 | 138.2195 | 120.5125 | 82.5769  | 138.2195 | 120.5125 | 82.5769  | 138.2195  | 120.5125 | 82.5769  | 138.2195 | 120.5125 | 82.5769  | 138.2195 | 120.5125 | 82.5769  | 138.2195 | 120.5125 | 82.5769  | 138.2195 |          |
| CUST_39480_P1429010886 | M39996  | 0.007564 | 15     | 12    |           |                                                                       |             |         | 143.681  | 99.355    | 101.9016 | 41.4176  | 30.7865  | 16.28536 | 33.0139  | 186.2032 | 10.58861 | 17.3624  | 40.7708  | 67.6718  | 15.6625  | 39.5989  | 19.554187 | 42.9632  | 88.27561 | 55.4245  | 203.529  | 104.016  | 74.806   | 28694.35 | 211.913  | 49.272   | 28866.67 | 42.898   | 27.971   |          |
| CUST_49205_P1429010886 | M84665  | 0.007564 | 15     | 12    |           |                                                                       |             |         | 33.3335  | 31.34763  | 10.0156  | 16.7128  | 18.2193  | 28.4101  | 10.80461 | 26.67812 | 20.5999  | 37.15687 | 42.53334 | 48.46138 | 14.9933  | 18.60353 | 28.46705  | 30.3611  | 25.93258 | 24.81825 | 46.53178 | 19.4498  | 11.0543  | 26.7235  | 23.714   | 70.6621  | 21.747   | 20.6615  |          |          |
| CUST_7194_P1429010886  | M41462  | 0.007565 | 15     | 9     | 443711213 | hypothetical protein CAPTEDRAFT_147624 [Capitell                      |             |         | 2.7E-11  | 12.51404  | 17.42482 | 18.01506 | 12.72738 | 13.1081  | 13.1081  | 13.1081  | 13.1081  | 13.1081  | 13.1081  | 13.1081  | 13.1081  | 13.1081  | 13.1081   | 13.1081  | 13.1081  | 13.1081  | 13.1081  | 13.1081  | 13.1081  | 13.1081  | 13.1081  | 13.1081  | 13.1081  | 13.1081  | 13.1081  |          |
| CUST_7524_P1429010886  | N12674  | 0.007569 | 15     | 9     |           |                                                                       |             |         | 39.93269 | 80.7537   | 88.4836  | 113.7109 | 99.107   | 105.7129 | 120.5452 | 57.6325  | 61.93802 | 59.4395  | 79.0472  | 52.62163 | 70.8744  | 65.5643  | 61.93802  | 59.4395  | 79.0472  | 52.62163 | 70.8744  | 65.5643  | 61.93802 | 59.4395  | 79.0472  | 52.62163 | 70.8744  | 65.5643  | 61.93802 |          |
| CUST_25909_P1429010886 | N53283  | 0.007569 | 15     | 3     |           |                                                                       |             |         | 98.63799 | 41.96975  | 51.2513  | 34.57302 | 36.23666 | 46.4631  |          |          |          |          |          |          |          |          |           |          |          |          |          |          |          |          |          |          |          |          |          |          |











| Probe ID                    | Ensembl ID | p-value | Period | Phase | Ensembl ID | Annotation | GO category | Go term | E-value   | 0        | 1        | 2        | 3        | 4        | 5        | 6        | 7        | 8        | 9        | 10       | 11       | 12       | 13        | 14       | 15       | 16       | 17       | 18       | 19       | 20       | 21       | 22       | 23       | 24       | 25       |
|-----------------------------|------------|---------|--------|-------|------------|------------|-------------|---------|-----------|----------|----------|----------|----------|----------|----------|----------|----------|----------|----------|----------|----------|----------|-----------|----------|----------|----------|----------|----------|----------|----------|----------|----------|----------|----------|----------|
| CUST_14359_p43210886 IK2756 | K02156     | 0.01322 | 24     | 1     |            |            |             |         | 46.40223  | 3.47005  | 36.94265 | 22.03473 | 39.00381 | 32.52687 | 24.62111 | 34.00581 | 31.20174 | 43.87581 | 37.63897 | 45.3426  | 28.34801 | 48.10518 | 38.3841   | 49.66096 | 27.85193 | 64.18045 | 48.25178 | 42.16986 | 45.35819 | 41.28967 | 35.44133 | 34.95753 | 45.28004 | 35.53033 | 39.8936  |
| CUST_29336_p43210886 N96688 | K02156     | 0.01322 | 24     | 0     |            |            |             |         | 286.997   | 149.1852 | 33.7197  | 362.4984 | 46.9486  | 390.7764 | 374.1535 | 403.2396 | 325.4086 | 402.5912 | 383.2759 | 330.0666 | 380.9077 | 307.1977 | 41.4381   | 40.5219  | 51.3721  | 361.9435 | 30.8079  | 438.2102 | 438.2102 | 48.0704  | 41.4726  | 37.5132  | 41.8201  | 46.2648  |          |
| CUST_27286_p43210886 W67686 | K02132     | 0.01232 | 21     | 15    |            |            |             |         | 11.46964  | 16.85623 | 16.39396 | 15.38835 | 16.45281 | 16.79178 | 14.87018 | 15.96811 | 11.69456 | 18.49189 | 18.1215  | 13.90068 | 12.94008 | 12.04313 | 11.43881  | 30.29871 | 20.1739  | 39.88004 | 14.47941 | 41.65923 | 17.5674  | 13.2322  | 10.30381 | 18.47844 | 13.92633 | 13.97811 | 10.17648 |
| CUST_29336_p43210886 N96688 | K02156     | 0.01322 | 24     | 0     |            |            |             |         | 11.11E-13 | 13.77798 | 19.95159 | 15.1509  | 10.03222 | 12.46576 | 8.01167  | 10.16747 | 10.16747 | 10.16747 | 10.16747 | 10.16747 | 10.16747 | 10.16747 | 10.16747  | 10.16747 | 10.16747 | 10.16747 | 10.16747 | 10.16747 | 10.16747 | 10.16747 | 10.16747 | 10.16747 | 10.16747 | 10.16747 |          |
| CUST_51443_p43210886 M93553 | K021347    | 0.01247 | 24     | 1     |            |            |             |         | 53.2143   | 59.16475 | 79.09573 | 39.64527 | 59.91447 | 51.11582 | 49.03345 | 42.80624 | 48.78657 | 74.9284  | 59.11379 | 48.69992 | 47.58792 | 63.70202 | 42.56642  | 46.93128 | 39.7489  | 55.6042  | 65.69232 | 13.86312 | 58.544   | 86.43301 | 70.5847  | 18.53457 | 69.08039 | 10.74934 |          |
| CUST_7388_p43210886 N21482  | K021347    | 0.01247 | 24     | 1     |            |            |             |         | 4.23E-35  | 95.18251 | 10.1217  | 112.8267 | 66.78979 | 68.97148 | 66.07148 | 66.468   | 15.7184  | 38.383   | 120.7015 | 88.96346 | 10.80922 | 10.7779  | 62.9042   | 110.9642 | 110.7375 | 55.1235  | 78.95924 | 10.5812  | 122.0812 | 126.722  | 10.71    | 10.71    | 10.71    | 10.71    | 10.71    |
| CUST_47408_p43210886 M97889 | K021363    | 0.01263 | 21     | 3     |            |            |             |         | 9.065334  | 236.2907 | 92.4721  | 428.785  | 155.8809 | 181.887  | 149.889  | 109.3629 | 101.2888 | 117.732  | 63.1738  | 63.1738  | 70.06228 | 110.6199 | 59.9029   | 119.5328 | 184.8141 | 134.1419 | 68.94281 | 62.94659 | 188.5235 | 152.3599 | 140.129  | 117.797  | 200.184  | 262.818  | 71.2452  |
| CUST_1264_p43210886 N9070   | K021327    | 0.01237 | 12     | 3     |            |            |             |         | 15.82E-11 | 305.3951 | 751.4903 | 70.90799 | 146.2974 | 606.211  | 9501.999 | 747.639  | 9371.785 | 1901.328 | 79.99991 | 4.70761  | 3.83027  | 417.713  | 15.82E-11 | 17966.78 | 1912.04  | 858.669  | 76.87222 | NA       | 4157.716 | 12983.85 | NA       | 11.28957 | NA       | 11.28957 | NA       |
| CUST_40954_p43210886 M55562 | K021347    | 0.01234 | 24     | 1     |            |            |             |         | 1.600E-9  | 124.65   | 144.64   | 85.81    | 115.047  | 157.14   | 63.817   | 101.604  | 101.604  | 101.604  | 101.604  | 101.604  | 101.604  | 101.604  | 101.604   | 101.604  | 101.604  | 101.604  | 101.604  | 101.604  | 101.604  | 101.604  | 101.604  | 101.604  | 101.604  | 101.604  |          |
| CUST_40954_p43210886 M55562 | K021347    | 0.01234 | 24     | 1     |            |            |             |         | 3.59E-38  | 140.09   | 129.2314 | 170.6324 | 10       |          |          |          |          |          |          |          |          |          |           |          |          |          |          |          |          |          |          |          |          |          |          |



| Protein ID                  | p-value  | Period | Phase | Enr ID | Annotation | GO category | Go term | Evalue   | 0        | 1        | 2        | 3         | 4         | 5         | 6         | 7         | 8         | 9         | 10        | 11        | 12        | 13        | 14        | 15        | 16        | 17        | 18        | 19        | 20        | 21        | 22        | 23        | 24        | 25        |           |        |
|-----------------------------|----------|--------|-------|--------|------------|-------------|---------|----------|----------|----------|----------|-----------|-----------|-----------|-----------|-----------|-----------|-----------|-----------|-----------|-----------|-----------|-----------|-----------|-----------|-----------|-----------|-----------|-----------|-----------|-----------|-----------|-----------|-----------|-----------|--------|
| CUST_33324_P429100886 M6599 | 0.013926 | 24     | 15    |        |            |             |         | 336.976  | 145.015  | 508.824  | 159.528  | 368.002   | 285.5481  | 482.976   | 24.144    | 409.755   | 410.902   | 396.916   | 390.903   | 76.743    | 448.955   | 350.702   | 397.898   | 780.927   | 496.323   | 567.360   | 693.741   | 361.003   | 496.323   | 639.728   | 639.123   | 447.549   | 579.646   | 446.694   | 581.263   |        |
| CUST_33324_P429100886 M6599 | 0.013926 | 24     | 15    |        |            |             |         | 35.98798 | 34.834   | 46.9134  | 11.8596  | 36.1267   | 59.6581   | 35.4771   | 44.9424   | 33.519    | 44.9424   | 33.519    | 44.9424   | 33.519    | 44.9424   | 33.519    | 44.9424   | 33.519    | 44.9424   | 33.519    | 44.9424   | 33.519    | 44.9424   | 33.519    | 44.9424   | 33.519    | 44.9424   | 33.519    | 44.9424   | 33.519 |
| CUST_33324_P429100886 M6599 | 0.013926 | 24     | 15    |        |            |             |         | 94.127   | 81.87168 | 105.8077 | 93.9639  | 77.10171  | 84.9677   | 78.5346   | 75.7002   | 71.858    | 65.6167   | 77.10171  | 84.9677   | 78.5346   | 75.7002   | 71.858    | 65.6167   | 77.10171  | 84.9677   | 78.5346   | 75.7002   | 71.858    | 65.6167   | 77.10171  | 84.9677   | 78.5346   | 75.7002   | 71.858    | 65.6167   |        |
| CUST_33324_P429100886 M6599 | 0.013926 | 24     | 15    |        |            |             |         | 14.0671  | 28.3776  | 25.4312  | 5.920956 | 12.00882  | 13.8861   | 13.2917   | 18.5519   | 20.5001   | 27.6011   | 11.3347   | 19.5324   | 18.3234   | 24.3308   | 24.0625   | 23.9568   | 16.747    | 15.8205   | 15.9135   | 19.1535   | 10.1831   | 13.7013   | 12.7835   | 14.5818   | 25.9843   | 17.4288   | 17.2422   | 17.2422   |        |
| CUST_33324_P429100886 M6599 | 0.013926 | 24     | 15    |        |            |             |         | 1.22-112 | 22.94293 | 20.37871 | 18.44972 | 17.61332  | 20.08082  | 13.08878  | 18.08051  | 12.29647  | 20.11281  | 22.72881  | 15.14331  | 19.3347   | 24.3308   | 24.0625   | 23.9568   | 16.747    | 15.8205   | 15.9135   | 19.1535   | 10.1831   | 13.7013   | 12.7835   | 14.5818   | 25.9843   | 17.4288   | 17.2422   | 17.2422   |        |
| CUST_33324_P429100886 M6599 | 0.013926 | 24     | 15    |        |            |             |         | 22.97432 | 20.37871 | 18.44972 | 17.61332 | 20.08082  | 13.08878  | 18.08051  | 12.29647  | 20.11281  | 22.72881  | 15.14331  | 19.3347   | 24.3308   | 24.0625   | 23.9568   | 16.747    | 15.8205   | 15.9135   | 19.1535   | 10.1831   | 13.7013   | 12.7835   | 14.5818   | 25.9843   | 17.4288   | 17.2422   | 17.2422   |           |        |
| CUST_33324_P429100886 M6599 | 0.013926 | 24     | 15    |        |            |             |         | 3.5E-45  | 82.7643  | 44.722   | 55.9701  | 47.6135   | 56.9148   | 55.9708   | 56.1276   | 55.9708   | 56.1276   | 55.9708   | 56.1276   | 55.9708   | 56.1276   | 55.9708   | 56.1276   | 55.9708   | 56.1276   | 55.9708   | 56.1276   | 55.9708   | 56.1276   | 55.9708   | 56.1276   | 55.9708   | 56.1276   | 55.9708   | 56.1276   |        |
| CUST_33324_P429100886 M6599 | 0.013926 | 24     | 15    |        |            |             |         | 13.4001  | 6.945845 | 7.190888 | 5.423484 | 7.190888  | 5.423484  | 7.190888  | 5.423484  | 7.190888  | 5.423484  | 7.190888  | 5.423484  | 7.190888  | 5.423484  | 7.190888  | 5.423484  | 7.190888  | 5.423484  | 7.190888  | 5.423484  | 7.190888  | 5.423484  | 7.190888  | 5.423484  | 7.190888  | 5.423484  | 7.190888  | 5.423484  |        |
| CUST_33324_P429100886 M6599 | 0.013926 | 24     | 15    |        |            |             |         | 46.25026 | 134.282  | 155.6229 | 6.9339   | 33.188184 | 33.188184 | 33.188184 | 33.188184 | 33.188184 | 33.188184 | 33.188184 | 33.188184 | 33.188184 | 33.188184 | 33.188184 | 33.188184 | 33.188184 | 33.188184 | 33.188184 | 33.188184 | 33.188184 | 33.188184 | 33.188184 | 33.188184 | 33.188184 | 33.188184 | 33.188184 | 33.188184 |        |
| CUST_33324_P429100886 M6599 | 0.013926 | 24     | 15    |        |            |             |         | 5.12E-21 |          |          |          |           |           |           |           |           |           |           |           |           |           |           |           |           |           |           |           |           |           |           |           |           |           |           |           |        |







| Probe ID                 | Ensembl ID | p-value  | Period | Phase | Ensembl ID | Annotation                                                     | GO category       | GO term | E-value  | 1        | 2        | 3        | 4        | 5        | 6        | 7        | 8        | 9        | 10       | 11       | 12       | 13       | 14       | 15       | 16       | 17       | 18       | 19       | 20       | 21       | 22       | 23       | 24       |          |          |          |
|--------------------------|------------|----------|--------|-------|------------|----------------------------------------------------------------|-------------------|---------|----------|----------|----------|----------|----------|----------|----------|----------|----------|----------|----------|----------|----------|----------|----------|----------|----------|----------|----------|----------|----------|----------|----------|----------|----------|----------|----------|----------|
| CUST_52780.241902010886  | IM9645     | 0.017481 | 15     | 1     |            |                                                                |                   |         | 19.36347 | 13.86795 | 15.42005 | 12.06387 | 11.30106 | 8.70883  | 11.57836 | 7.83152  | 10.39312 | 12.93269 | 17.3225  | 8.56741  | 18.16906 | 18.7709  | 17.31011 | 13.12509 | 9.894781 | 21.05098 | 17.05676 | 19.67357 | 20.23489 | 18.26411 | 12.17905 | 6.166835 | 12.8856  | 30.04719 | 19.45678 |          |
| CUST_6716.241902010886   | IM9045     | 0.017483 | 15     | 1     | 117959988  | clotable protein [Mus musculus japonicus]                      |                   |         | 1.88E-32 | 209.2891 | 246.3608 | 154.7492 | 223.5364 | 158.4578 | 198.0939 | 120.6264 | 110.9327 | 268.639  | 150.404  | 208.674  | 146.6688 | 159.4927 | 110.5313 | 175.39   | 168.7053 | 158.9228 | 161.4128 | 144.1218 | 144.2147 | 158.9228 | 127.5355 | 147.011  | 145.6267 | 116.9944 |          |          |
| CUST_5040.241902010886   | IM18185    | 0.017489 | 15     | 1     |            |                                                                |                   |         | 1.88E-32 | 369.7607 | 322.7073 | 342.1612 | 237.1163 | 335.1542 | 220.9356 | 103.4971 | 250.9912 | 367.0768 | 419.781  | 351.364  | 354.269  | 423.927  | 430.9606 | 249.1295 | 473.383  | 350.556  | 218.5724 | 367.2487 | 310.31   | 290.6024 | 40.484   | 308.049  | 188.014  | 39.121   | 103.611  | 50.06995 |
| CUST_117009.241902010886 | IM11111    | 0.017489 | 15     | 1     |            |                                                                |                   |         | 1.88E-32 | 15.71998 | 39.2917  | 15.6479  | 25.9219  | 15.6479  | 25.9219  | 15.6479  | 25.9219  | 15.6479  | 25.9219  | 15.6479  | 25.9219  | 15.6479  | 25.9219  | 15.6479  | 25.9219  | 15.6479  | 25.9219  | 15.6479  | 25.9219  | 15.6479  | 25.9219  | 15.6479  | 25.9219  | 15.6479  | 25.9219  |          |
| CUST_7350.241902010886   | IM21262    | 0.017513 | 21     | 9     | 21922664   | PREDICTED: Scrobbid Hydrolyase family member Metabolic process |                   |         | 2.01E-40 | 10.19147 | 10.14703 | 10.28833 | 70.4036  | 10.8686  | 44.2926  | 57.3971  | 21.856   | 150.54   | 15.563   | 20.392   | 140.876  | 68.2038  | 94.6808  | 46.89105 | 65.52784 | 47.0213  | 13.0567  | 39.4936  | 113.725  | 16.3431  | 45.72037 | 55.5574  | 10.5847  | 10.5847  | 10.5847  |          |
| CUST_12357.241902010886  | IM10515    | 0.017515 | 24     | 9     | 282403505  | fumble isosorbide 2 [Tribolium castaneum]                      | Metabolic process |         | 1.88E-49 | 9.288423 | 14.306   | 13.0288  | 14.10202 | 13.0292  | 13.0292  | 13.0292  | 13.0292  | 13.0292  | 13.0292  | 13.0292  | 13.0292  | 13.0292  | 13.0292  | 13.0292  | 13.0292  | 13.0292  | 13.0292  | 13.0292  | 13.0292  | 13.0292  | 13.0292  | 13.0292  | 13.0292  | 13.0292  |          |          |
| CUST_25106.241902010886  | IM51792    | 0.017525 | 18     | 3     |            |                                                                |                   |         | 5.82E-27 | 4.99379  | 5.92832  | 18.0732  | 16.1031  | 16.2539  | 15.2039  | 16.7668  | 15.62792 | 6.32734  | 12.63734 | 14.7933  | 17.94486 | 15.50643 | 8.12051  | 6.23673  | 12.63734 | 14.7933  | 17.94486 | 15.50643 | 8.12051  | 6.23673  | 12.63734 | 14.7933  | 17.94486 | 15.50643 | 8.12051  |          |
| CUST_22146.241902010886  | IM6514     | 0.017529 | 12     | 3     |            |                                                                |                   |         | 20.0185  | 189.15   | 112.818  | 176.3863 | 208.39   | 207.1625 | 207.1625 | 207.1625 | 207.1625 | 207.1625 | 207.1625 | 207.1625 | 207.1625 | 207.1625 | 207.1625 | 207.1625 | 207.1625 | 207.1625 | 207.1625 | 207.1625 | 207.1625 | 207.1625 | 207.1625 | 207.1625 | 207.1625 | 207.1625 |          |          |
| CUST_11499.241902010886  | IM10514    | 0.017529 | 12     | 3     |            |                                                                |                   |         | 15.1615  | 16.0073  | 13.5807  | 11.2325  | 11.2325  | 11.2325  | 11.2325  | 11.2325  | 11.2325  | 11.2325  | 11.2325  | 11.2325  | 11.2325  | 11.2325  | 11.2325  | 11.2325  | 11.2325  | 11.2325  | 11.2325  | 11.2325  | 11.2325  | 11.2325  | 11.2325  | 11.2325  | 11.2325  | 11.2325  |          |          |
| CUST_36634.241902010886  | IM16163    | 0.017534 | 24     | 3     | 27004403   | hypothetical                                                   |                   |         |          |          |          |          |          |          |          |          |          |          |          |          |          |          |          |          |          |          |          |          |          |          |          |          |          |          |          |          |



| Probe ID                    | E-value  | Period | Phase | EBI ID | Annotation | GO category | Go term   | E-value                                                              | 1        | 2        | 3        | 4        | 5        | 6        | 7        | 8        | 9        | 10       | 11       | 12       | 13       | 14       | 15       | 16       | 17       | 18       | 19       | 20       | 21       | 22       | 23       | 24       |          |          |          |
|-----------------------------|----------|--------|-------|--------|------------|-------------|-----------|----------------------------------------------------------------------|----------|----------|----------|----------|----------|----------|----------|----------|----------|----------|----------|----------|----------|----------|----------|----------|----------|----------|----------|----------|----------|----------|----------|----------|----------|----------|----------|
| CUST_9235_P43100886 N4278   | 0.017027 | 12     | 0     |        |            |             |           | 27.84094                                                             | 92.07382 | 58.4323  | 31.8356  | 17.49601 | 14.1461  | 16.2077  | 12.8249  | 5.76784  | 48.29446 | 6.54514  | 14.72118 | 26.3141  | 32.52687 | 21.57953 | 7.986139 | 35.76159 | 18.46372 | 17.28116 | 31.8423  | 11.94615 | 13.44962 | 27.3792  | 16.29756 | 14.29433 | 15.4643  | 33.45717 |          |
| CUST_34240_P43100886 M9164  | 0.017927 | 21     | 9     |        |            |             |           | 15.32584                                                             | 17.42392 | 11.8844  | 22.3102  | 26.04672 | 14.5095  | 19.9854  | 6.18886  | 42.78573 | 24.17061 | 48.3882  | 61.35668 | 54.34709 | 32.96309 | 30.02913 | 13.86466 | 13.47681 | 6.684674 | 17.41182 | 19.6359  | 30.95703 | 13.14569 | 10.48086 | N.A.     | 5.92402  | 23.69143 | 36.26174 |          |
| CUST_56800_P43100886 M14674 | 0.017947 | 24     | 18    |        |            |             |           | 250.1572                                                             | 21.1514  | 264.7596 | 206.467  | 22.4855  | 183.021  | 20.14    | 20.14    | 20.14    | 20.14    | 20.14    | 20.14    | 20.14    | 20.14    | 20.14    | 20.14    | 20.14    | 20.14    | 20.14    | 20.14    | 20.14    | 20.14    | 20.14    | 20.14    | 20.14    | 20.14    |          |          |
| CUST_32468_P43100886 M6649  | 0.017967 | 12     | 3     |        |            |             |           | 254.2335                                                             | 12.9188  | 216.9734 | 204.8475 | 79.53759 | 104.2848 | 1881.402 | 916.177  | 70.7862  | 36.622   | 53.86    | 126.1166 | 127.9218 | 34.91356 | 31.93182 | 29.988   | 162.9465 | 187.9313 | 107.997  | 97.0262  | 149.7075 | 82.448   | 98.0221  | 80.9009  | 913.4609 | 174.7212 | 583.772  | 188.3123 |
| CUST_44138_P43100886 M7876  | 0.017972 | 12     | 3     |        |            |             |           | 11.70951                                                             | 19.34119 | 22.4128  | 17.43453 | 20.70807 | 17.14515 | 17.14515 | 17.14515 | 17.14515 | 17.14515 | 17.14515 | 17.14515 | 17.14515 | 17.14515 | 17.14515 | 17.14515 | 17.14515 | 17.14515 | 17.14515 | 17.14515 | 17.14515 | 17.14515 | 17.14515 | 17.14515 | 17.14515 | 17.14515 |          |          |
| CUST_12248_P43100886 M6408  | 0.018006 | 21     | 3     |        |            |             | 390374449 | 547.2331                                                             | 770.410  | 568.5491 | 934.7525 | 778.2204 | 400.907  | 516.177  | 409.1167 | 469.1167 | 469.1167 | 469.1167 | 469.1167 | 469.1167 | 469.1167 | 469.1167 | 469.1167 | 469.1167 | 469.1167 | 469.1167 | 469.1167 | 469.1167 | 469.1167 | 469.1167 | 469.1167 | 469.1167 | 469.1167 |          |          |
| CUST_39982_P43100886 M47801 | 0.01983  | 21     | 0     |        |            |             |           | 16.16875                                                             | 32.03258 | 18.93198 | 34.84252 | 26.27126 | 37.41813 | 64.3867  | 33.6052  | 30.4662  | 22.7241  | 20.9085  | 17.8106  | 4.78177  | 166.9686 | 100.3289 | 103.3785 | 94.5653  | 19.5953  | 17.3473  | 378.9452 | 17.0881  | 10.6973  | 28.1129  | 54.50212 | 60.9978  | 122.0376 | 53.23608 |          |
| CUST_17878_P43100886 M8376  | 0.019837 | 24     | 0     |        |            |             | 317165637 | 30.32568                                                             | 18.93198 | 34.84252 | 10.25265 | 19.96839 | 29.52873 | 9.25041  | 8.91251  | 16.10515 | 18.7912  | 14.2148  | 27.7003  | 6.89174  | 11.64373 | 6.503135 | 11.92991 | 30.23126 | 12.16205 | 17.94343 | 50.8016  | 17.0884  | 16.6238  | 7.57526  | 12.60122 | 17.10346 | 18.7516  |          |          |
| CUST_4729_P43100886 M6770   | 0.019846 | 15     | 0     |        |            |             | 241751605 | G-protein coupled receptor, putative [nodes scalp/skin transduction] |          |          |          |          |          |          |          |          |          |          |          |          |          |          |          |          |          |          |          |          |          |          |          |          |          |          |          |
| CUST_44138_P43100886 M7876  | 0.019921 | 12     | 3     |        |            |             |           | 126.8844                                                             | 100.0527 | 17.1985  | 80.3519  | 80.3519  | 80.3519  | 80.3519  | 80.3519  | 80.3519  | 80.3519  | 80.3519  | 80.3519  | 80.3519  | 80.3519  | 80.3519  | 80.3519  | 80.3519  | 80.3519  | 80.3519  | 80.3519  | 80.3519  | 80.3519  | 80.3519  | 80.3519  | 80.3519  | 80.3519  |          |          |
| CUST_11290_P43100886 M7050  | 0.019853 | 21     | 15    |        |            |             |           |                                                                      |          |          |          |          |          |          |          |          |          |          |          |          |          |          |          |          |          |          |          |          |          |          |          |          |          |          |          |



| Probe ID                     | GO       | p-value | Period | Phase | EBI ID | Annotation | GO category | Go term  | E-value                                                                | 1        | 2        | 3        | 4        | 5        | 6        | 7        | 8        | 9        | 10       | 11       | 12       | 13       | 14       | 15       | 16       | 17       | 18       | 19       | 20       | 21       | 22       | 23       | 24       | 25       |         |
|------------------------------|----------|---------|--------|-------|--------|------------|-------------|----------|------------------------------------------------------------------------|----------|----------|----------|----------|----------|----------|----------|----------|----------|----------|----------|----------|----------|----------|----------|----------|----------|----------|----------|----------|----------|----------|----------|----------|----------|---------|
| CUST_20111_P429010886 N42830 | 0.021688 | 21      |        |       |        |            |             |          | 24.54149                                                               | 17.97387 | 34.28424 | 23.70484 | 18.46027 | 25.68021 | 23.35941 | 18.95558 | 18.05541 | 34.48473 | 23.94321 | 21.49594 | 16.62399 | 23.18723 | 23.52604 | 18.62971 | 20.00661 | 31.49395 | 20.68784 | 19.07106 | 30.36684 | 28.78598 | 32.84186 | 39.13986 | 27.49114 | 29.41008 | 27.9072 |
| CUST_11438_P429010886 N72005 | 0.021873 | 18      |        |       |        |            |             |          | 15.12815                                                               | 17.02696 | 15.04873 | 17.57242 | 26.82709 | 21.15364 | 16.29159 | 9.99353  | 19.33739 | 13.35309 | 14.12974 | 10.29272 | 10.98742 | 11.88288 | 9.45936  | 28.958   | 14.09753 | 20.54429 | 19.12622 | 18.13608 | 30.96813 | 29.74742 | 17.76388 | 18.818   | 22.29224 | 51.74878 |         |
| CUST_34598_P429010886 M10120 | 0.021873 | 15      |        |       |        |            |             |          | 144.2346                                                               | 26.5686  | 84.90731 | 121.9639 | 101.719  | 113.1661 | 66.95491 | 69.38231 | 90.40629 | 79.8552  | 104.388  | 82.64391 | 84.9247  | 81.384   | 75.7689  | 87.0719  | 115.1295 | 73.16394 | 100.7216 | 80.1017  | 19.49116 | 60.92331 | 18.70632 | 10.86726 | 40.93991 | 84.96946 |         |
| CUST_34598_P429010886 M10120 | 0.021873 | 15      |        |       |        |            |             |          | 123.8474                                                               | 463.5915 | 431.7388 | 300.0232 | 450.9914 | 472.0324 | 352.5739 | 417.7    | 450.9914 | 552.4266 | 514.672  | 479.5801 | 359.3716 | 538.667  | 309.8758 | 338.0611 | 647.3021 | 390.0606 | 482.387  |          |          |          |          |          |          |          |         |
| CUST_35610_P429010886 M13016 | 0.021877 | 15      |        |       |        |            |             |          | 258.6759                                                               | 285.3755 | 109.9824 | 190.8604 | 140.194  | 98.75692 | 170.553  | 266.4747 | 265.1181 | 364.0324 | 292.1904 | 340.239  | 331.6846 | 270.9071 | 294.4572 | 277.0736 | 180.7626 | 275.8944 | 363.0024 | 292.5508 | 323.8163 | 422.0003 | 247.3239 | 409.1687 | 370.3508 | 429.466  |         |
| CUST_39237_P429010886 M36559 | 0.021887 | 15      |        |       |        |            |             |          | 126.6258                                                               | 4374.715 | 101.924  | 155.1146 | 210.816  | 117.627  | 3799.249 | 463.558  | 268.6476 | 7128.301 | 37.2194  | 2175.001 | 322.7703 | 4571.032 | 59.9477  | 3811.147 | 1617.488 | 3767.24  | 158.658  | 874.691  | 2189.348 | 20.7749  | 3882.492 | 415.509  | 681      | 411.064  |         |
| CUST_42778_P429010886 M61230 | 0.021887 | 15      |        |       |        |            |             |          | 21.66199                                                               | 19.72816 | 13.7981  | 10.52725 | 7.472726 | 25.68021 | 13.64945 | 25.65555 | 16.28138 | 23.50136 | 22.24949 | 26.5751  | 21.83352 | 15.93461 | 20.76838 | 18.24021 | 17.70313 | 20.60616 | 12.50339 | 28.74937 | 17.42392 | 19.3603  | 13.10392 | 27.8588  | 21.26675 | 84.85393 | 31.3759 |
| CUST_33221_P429010886 M6323  | 0.021887 | 15      |        |       |        |            |             | 26794242 | hypothetical protein BRAFLDRAFT_14861 [Branchi Nucleic acid metabolism |          |          |          |          |          |          |          |          |          |          |          |          |          |          |          |          |          |          |          |          |          |          |          |          |          |         |
| CUST_33221_P429010886 M6323  | 0.021887 | 15      |        |       |        |            |             |          | 1.644721                                                               | 20.78523 | 23.58619 | 9.20374  | 8.84247  | 11.41241 | 10.5467  | 10.8899  | 9.751    | 10.8899  | 9.751    | 10.8899  | 9.751    | 10.8899  | 9.751    | 10.8899  | 9.751    | 10.8899  | 9.751    | 10.8899  | 9.751    | 10.8899  | 9.751    | 10.8899  | 9.751    | 10.8899  | 9.751   |
| CUST_40095_P429010886 M64593 | 0.021887 | 15      |        |       |        |            |             |          | 36.14934                                                               | 321.7265 | 643.9207 | 308.2184 | 644.9946 | 416.7554 | 400.0206 | 86.4112  | 181.1352 | 306.3721 | 490.7702 | 544.848  | 477.9038 | 506.9736 | 570.6164 | 493.7553 | 463.951  | 429.4567 | 478.2055 | 485.719  | 591.845  | 492.0126 | 451.1707 | 648.753  | 335.258  | 582.459  | 41.066  |
| CUST_44301_P429010886 M65549 | 0.021887 |         |        |       |        |            |             |          |                                                                        |          |          |          |          |          |          |          |          |          |          |          |          |          |          |          |          |          |          |          |          |          |          |          |          |          |         |



| Probe ID              | Accession | Value    | Period | Phase | EBI ID | Annotation | GO category | GO term | E-value  | 0        | 1        | 2        | 3        | 4        | 5        | 6        | 7        | 8        | 9        | 10       | 11       | 12       | 13       | 14       | 15       | 16       | 17       | 18       | 19       | 20       | 21       | 22       | 23       | 24       | 25       |
|-----------------------|-----------|----------|--------|-------|--------|------------|-------------|---------|----------|----------|----------|----------|----------|----------|----------|----------|----------|----------|----------|----------|----------|----------|----------|----------|----------|----------|----------|----------|----------|----------|----------|----------|----------|----------|----------|
| CUST_21782_P429010886 | N45845    | 0.023865 | 15     | 9     |        |            |             |         | 22.97663 | 12.02238 | 12.42885 | 27.36512 | 18.69493 | 56.11071 | 19.97654 | 16.84886 | 12.94311 | 50.08673 | 36.06457 | 78.79492 | 15.5279  | 13.30987 | 14.74405 | 21.52428 | 43.94366 | 13.45887 | 44.9603  | 28.7018  | 15.84737 | 14.53418 | 20.75935 | 42.43668 | 28.24702 | 52.5224  | 37.16398 |
| CUST_12210_P429010886 | N28960    | 0.023875 | 15     | 9     |        |            |             |         | 176.2631 | 180.6083 | 138.6167 | 109.5894 | 130.891  | 108.2633 | 101.92   | 14.8783  | 104.3839 | 140.2891 | 128.014  | 111.9971 | 12.3207  | 119.6514 | 13.0557  | 166.4042 | 17.1317  | 133.9393 | 14.8641  | 127.0971 | 15.7246  | 14.2426  | 127.0219 | 110.001  | 138.9124 | 14.1478  | 14.789   |
| CUST_24240_P429010886 | N28960    | 0.023875 | 18     | 9     |        |            |             |         | 10.22966 | 56.63426 | 23.67471 | 7.828316 | 10.00209 | 12.36737 | 13.26879 | 21.35581 | 20.0439  | 34.3047  | 17.9453  | 26.84488 | 12.96349 | 24.96354 | 26.05467 | 10.92029 | 25.68021 | 17.52814 | 24.71751 | 24.72979 | 14.33442 | 19.04932 | 13.38378 | 24.18014 | 27.10097 | 14.35783 |          |
| CUST_1415_P429010886  | N9562     | 0.023909 | 12     | 3     |        |            |             |         | 40.62099 | 18.54527 | 11.55089 | 8.81459  | 10.36077 | 10.71318 | 11.7995  | 10.688   | 11.788   | 11.788   | 11.788   | 11.788   | 11.788   | 11.788   | 11.788   | 11.788   | 11.788   | 11.788   | 11.788   | 11.788   | 11.788   | 11.788   | 11.788   | 11.788   | 11.788   | 11.788   |          |
| CUST_35270_P429010886 | M12101    | 0.023922 | 12     | 3     |        |            |             |         | 965.8744 | 265.6599 | 153.1027 | 327.6701 | 412.4272 | 463.1187 | 1017.693 | 120.0686 | 794.7159 | 6.672139 | 34.7560  | NA       | 127.5086 | 20.7453  | 55.6554  | NA       | 2768.781 | 288.401  | 588.1169 | NA       | 291.884  | 1.506462 | 181.9242 | 2692.301 | NA       | 294.578  |          |
| CUST_3134_P429010886  | N13871    | 0.023922 | 12     | 3     |        |            |             |         | 844.642  | 248.4954 | 5.28785  | 987.5052 | 864.2166 | 1506.127 | 551.3959 | 866.8694 | 35.8925  | 10.8722  | 28.7018  | 10.8722  | 55.1395  | 26.8664  | 36.0645  | 10.3322  | 106.617  | 98.1269  | 62.7377  | 17.18634 | 45.9398  | 77.9883  | 108.3734 | 858.767  | 32.872   | 13.6581  | 6.98091  |
| CUST_11408_P429010886 | N27759    | 0.023922 | 12     | 3     |        |            |             |         | 1581.923 | 512.683  | 181.0264 | 257.2138 | 257.2138 | 3060.282 | 17.01319 | 363.249  | 32.90388 | 98.39109 | 195.953  | 10.8722  | 33.0767  | 32.0265  | 298.026  | 471.589  | 32.1128  | 348.909  | 69.39933 | 10.71318 | 160.013  | 143.5899 | 108.973  | 56.1587  | 10.9123  | 10.7731  | 86.0379  |
| CUST_22968_P429010886 | N48052    | 0.023922 | 12     | 3     |        |            |             |         | 147.865  | 204.824  | 286.674  | 165.929  | 174.186  | 129.531  | 134.526  | 231.077  | 344.324  | 29.0189  | 214.7931 | 41.822   | 224.6703 | 128.906  | 240.618  | 107.9828 | 134.537  | 288.868  | 7338.425 | 173.373  | 487.025  | 285.842  | 1754.303 | 2485.559 | 2454.105 | 57.7782  |          |
| CUST_27273_P429010886 | N55750    | 0.023923 | 21     | 3     |        |            |             |         | 12.6587  | 151.4178 | 12.6587  | 151.4178 | 12.6587  | 151.4178 | 12.6587  | 151.4178 | 12.6587  | 151.4178 | 12.6587  | 151.4178 | 12.6587  | 151.4178 | 12.6587  | 151.4178 | 12.6587  | 151.4178 | 12.6587  | 151.4178 | 12.6587  | 151.4178 | 12.6587  | 151.4178 | 12.6587  | 151.4178 | 12.6587  |
| CUST_15351_P429010886 | N34443    | 0.023923 | 21     | 3     |        |            |             |         | 50.57194 | 75.30403 | 63.2108  | 119.9123 | 68.8183  | 86.0426  | 56.28307 | 39.8936  | 48.6231  | 48.9801  | 43.2650  |          |          |          |          |          |          |          |          |          |          |          |          |          |          |          |          |

| Probe ID                      | GO ID  | p-value | Period | Phase | EB ID | Annotation | GO category | Go term                                | E-value  | 1        | 2        | 3        | 4         | 5        | 6        | 7        | 8        | 9        | 10       | 11       | 12       | 13       | 14       | 15       | 16       | 17       | 18       | 19        | 20       | 21       | 22       | 23       | 24       |          |           |          |          |
|-------------------------------|--------|---------|--------|-------|-------|------------|-------------|----------------------------------------|----------|----------|----------|----------|-----------|----------|----------|----------|----------|----------|----------|----------|----------|----------|----------|----------|----------|----------|----------|-----------|----------|----------|----------|----------|----------|----------|-----------|----------|----------|
| CUST_56552.1429010886 M114082 | Q04928 | 18      |        | 12    |       |            |             |                                        | 749.2477 | 73.7582  | 738.6637 | 680.3748 | 648.4582  | 618.5189 | 730.3407 | 674.0173 | 686.5061 | 841.0657 | 720.2699 | 909.4624 | 772.6887 | 848.6156 | 931.4066 | 1009.299 | 698.2329 | 761.273  | 807.937  | 1205.618  | 610.2139 | 101.687  | 602.6317 | 578.5402 | 107.18   | 747.636  | 963.151   |          |          |
| CUST_28183.1429010886 N57448  | Q02944 | 21      |        | 12    |       |            |             |                                        | 44.84616 | 27.34334 | 31.008   | 20.07408 | 24.89381  | 24.20353 | 26.6108  | 17.04303 | 21.47167 | 36.29714 | 32.46691 | 31.23744 | 34.88849 | 34.53055 | 37.63897 | 42.59702 | 27.9612  | 28.5239  | 34.7684  | 42.4293   | 39.09246 | 49.93988 | 23.54405 | 25.80322 | 42.68903 | 14.2884  | 14.28414  |          |          |
| CUST_38621.1429010886 M41892  | Q02499 | 18      |        | 12    |       |            |             | Cell growth                            | 5.78E-74 | 48.48469 | 60.38191 | 38.69435 | 56.67252  | 55.44338 | 52.71316 | 46.25128 | 35.1591  | 45.97028 | 45.5774  | 39.7419  | 44.08928 | 45.5774  | 38.88042 | 30.8981  | 42.4293  | 38.75008 | 38.07924 | 24.7644   | 43.9543  | 44.9237  | 44.66631 | 47.71506 | 33.96471 | 49.81423 | 46.48142  | 47.68903 | 39.06749 |
| CUST_515758.1429010886 M41892 | Q02499 | 18      |        | 12    |       |            |             | Cell growth                            | 2.4E-11  | 792.4242 | 255.3013 | 170.7304 | 2270.6068 | 730.6182 | 125.4444 | 12.00001 | 12.00001 | 12.00001 | 12.00001 | 12.00001 | 12.00001 | 12.00001 | 12.00001 | 12.00001 | 12.00001 | 12.00001 | 12.00001 | 12.00001  | 12.00001 | 12.00001 | 12.00001 | 12.00001 | 12.00001 | 12.00001 | 12.00001  | 12.00001 |          |
| CUST_31001.1429010886 M421    | Q02962 | 24      |        | 18    |       |            |             | Other                                  | 6.53E-36 | 298.7909 | 301.7139 | 338.1543 | 266.2051  | 291.9431 | 254.7815 | 217.4459 | 259.8913 | 303.1037 | 314.774  | 278.0994 | 338.3575 | 306.967  | 386.8236 | 334.534  | 356.6641 | 311.2463 | 310.0309 | 285.735   | 243.9343 | 347.641  | 334.8233 | 245.8213 | 305.499  | 298.709  | 337.066   |          |          |
| CUST_19517.1429010886 M41703  | Q02962 | 24      |        | 18    |       |            |             | Other                                  | 5.67E-64 | 286.7964 | 6.284056 | NA       |           | 5.061747 | 7.451842 | 26.2314  | 6.110367 | 22.47719 | 1.871424 | NA       | 5.016515 | 30.2562  | 3.631079 | 0.835951 | NA       | 33.52107 | 24.7406  | 46.7659   | 55.72819 | 81.3491  | 37.63001 | NA       | 8.956237 | 29.414   | 44.84606  |          |          |
| CUST_46167.1429010886 M173584 | Q02964 | 24      |        | 12    |       |            |             |                                        | 20.84589 | 20.22094 | 32.98985 | 17.94343 | 26.22091  | 22.92206 | 22.15897 | 25.81585 | 26.3134  | 24.29349 | 23.9473  | 44.63307 | 38.8829  | 37.9298  | 31.72288 | 33.5432  | 25.3353  | 24.3522  | 30.8159  | 36.9176   | 41.5454  | 31.274   | 33.24    | 36.6685  | 26.1826  | 30.1514  | 19.6901   | 37.7007  |          |
| CUST_53840.1429010886 M103625 | Q02967 | 24      |        | 12    |       |            |             | Regulation of translational elongation | 5.05E-57 | 168.001  | 182.0463 | 146.7394 | 125.4125  | 142.444  | 122.0001 | 122.0001 | 122.0001 | 122.0001 | 122.0001 | 122.0001 | 122.0001 | 122.0001 | 122.0001 | 122.0001 | 122.0001 | 122.0001 | 122.0001 | 122.0001  | 122.0001 | 122.0001 | 122.0001 | 122.0001 | 122.0001 | 122.0001 | 122.0001  | 122.0001 |          |
| CUST_9646.1429010886 N42981   | Q02969 | 12      |        | 0     |       |            |             |                                        | 48.59055 | 95.21099 | 65.11921 | 67.92832 | 61.86008  | 42.25718 | 46.39793 | 59.89328 | 13.32008 | 17.62313 | 68.97005 | 69.52992 | 63.3459  | 73.09489 | 12.0001  | 40.31169 | 24.88718 | 39.04991 | 40.10417 | 49.156673 | 43.12973 | 41.14845 | 47.75268 | 24.86718 | 51.90155 | 18.5075  | 147.16305 |          |          |
| CUST_30427.1429010886         |        |         |        |       |       |            |             |                                        |          |          |          |          |           |          |          |          |          |          |          |          |          |          |          |          |          |          |          |           |          |          |          |          |          |          |           |          |          |







| Probe ID              | Accession | MD5      | Value | Period | Phase | Enr ID | Annotation | GO category | Go term | Evalue   | 0        | 1        | 2        | 3        | 4         | 5        | 6        | 7        | 8        | 9        | 10       | 11       | 12       | 13       | 14       | 15       | 16       | 17       | 18       | 19       | 20       | 21       | 22       | 23       | 24       | 25       |
|-----------------------|-----------|----------|-------|--------|-------|--------|------------|-------------|---------|----------|----------|----------|----------|----------|-----------|----------|----------|----------|----------|----------|----------|----------|----------|----------|----------|----------|----------|----------|----------|----------|----------|----------|----------|----------|----------|----------|
| CUST_41336_P142100886 | MS477     | 0.029527 | 15    | 0      |       |        |            |             |         | 653.9628 | 698.4317 | 519.6133 | 414.2851 | 478.2055 | 517.6852  | 457.3191 | 433.7721 | 383.7751 | 439.0904 | 505.5887 | 584.1451 | 339.1595 | 427.4471 | 508.5068 | 801.7718 | 560.8883 | 624.2921 | 536.4898 | 573.864  | 475.032  | 602.2534 | 399.1635 | 419.7481 | 942.3167 | 570.0282 | 597.0282 |
| CUST_51284_P142100886 | M96678    | 0.029527 | 15    | 0      |       |        |            |             |         | 54.7663  | 91.56459 | 77.47192 | 48.3123  | 58.87771 | 63.87987  | 48.59467 | 56.68877 | 43.1718  | 66.9709  | 55.25124 | 62.72004 | 60.3963  | 69.42462 | 63.7598  | 70.10    | 65.50001 | 75.5075  | 53.6979  | 65.42947 | 61.9342  | 54.07581 | 81.18707 | 55.9385  | 65.8296  | 49.3195  | 65.1957  |
| CUST_46502_P142100886 | M72783    | 0.029528 | 12    | 0      |       |        |            |             |         | 7.41E-15 | 66.78979 | 20.0327  | 127.025  | 195.462  | 205.191   | 154.962  | 184.092  | 148.294  | 151.5243 | 249.098  | 151.5243 | 249.098  | 151.5243 | 249.098  | 151.5243 | 249.098  | 151.5243 | 249.098  | 151.5243 | 249.098  | 151.5243 | 249.098  | 151.5243 | 249.098  | 151.5243 | 249.098  |
| CUST_13955_P142100886 | M40795    | 0.029528 | 12    | 0      |       |        |            |             |         | 212.175  | 205.281  | 209.018  | 155.452  | 173.24   | 181.614   | 134.077  | 109.174  | 118.161  | 109.174  | 118.161  | 109.174  | 118.161  | 109.174  | 118.161  | 109.174  | 118.161  | 109.174  | 118.161  | 109.174  | 118.161  | 109.174  | 118.161  | 109.174  | 118.161  | 109.174  |          |
| CUST_39857_P142100886 | M45821    | 0.029554 | 12    | 3      |       |        |            |             |         | 151.8403 | 18.21746 | 35.35004 | 115.459  | 316.122  | 190.483   | 568.6876 | 403.6614 | 75.4033  | 1.7334   | 34.8239  | 1.7334   | 34.8239  | 1.7334   | 34.8239  | 1.7334   | 34.8239  | 1.7334   | 34.8239  | 1.7334   | 34.8239  | 1.7334   | 34.8239  | 1.7334   | 34.8239  | 1.7334   | 34.8239  |
| CUST_14739_P142100886 | N43384    | 0.029554 | 21    | 15     |       |        |            |             |         | 397.2764 | 10.5573  | 258.078  | 278.128  | 281.265  | 334.212   | 241.911  | 221.151  | 200.364  | 330.882  | 299.754  | 334.212  | 241.911  | 221.151  | 200.364  | 330.882  | 299.754  | 334.212  | 241.911  | 221.151  | 200.364  | 330.882  | 299.754  | 334.212  | 241.911  | 221.151  | 200.364  |
| CUST_4603_P142100886  | M71216    | 0.02958  | 15    | 18     |       |        |            |             |         | 24.8275  | 46.6074  | 36.2511  | 15.7265  | 23.51    | 185.273   | 15.6274  | 7.66315  | 10.4231  | 43.3729  | 15.9486  | 25.9987  | 24.0678  | 21.9726  | 35.18824 | 18.57026 | 39.70836 | 17.96001 | 41.12468 | 17.96001 | 41.12468 | 17.96001 | 41.12468 | 17.96001 | 41.12468 | 17.96001 | 41.12468 |
| CUST_31834_P142100886 | M251      | 0.0296   | 12    | 0      |       |        |            |             |         | 79.12272 | 17.129   | 128.141  | 176.11   | 461.249  | 398.073   | 398.073  | 398.073  | 398.073  | 398.073  | 398.073  | 398.073  | 398.073  | 398.073  | 398.073  | 398.073  | 398.073  | 398.073  | 398.073  | 398.073  | 398.073  | 398.073  | 398.073  | 398.073  | 398.073  | 398.073  | 398.073  |
| CUST_12129_P142100886 | N42121    | 0.029602 | 15    | 0      |       |        |            |             |         | 1.82E-11 | 172.061  | 216.608  | 196.388  | 151.529  | 196.388   | 151.529  | 196.388  | 151.529  | 196.388  | 151.529  | 196.388  | 151.529  | 196.388  | 151.529  | 196.388  | 151.529  | 196.388  | 151.529  | 196.388  | 151.529  | 196.388  | 151.529  | 196.388  | 151.529  | 196.388  | 151.529  |
| CUST_13568_P142100886 | N43194    | 0.029606 | 12    | 0      |       |        |            |             |         | 4.62E-07 | 528.5021 | 503.4817 | 534.5603 | 72.3677  | 69.8251</ |          |          |          |          |          |          |          |          |          |          |          |          |          |          |          |          |          |          |          |          |          |



[illegible]













[illegible]

| Probe ID               | Ensembl ID | p-value  | Period | Phase | Ensembl ID | Annotation                                                                                                                                                                                                                                                                                                                                                                                                                                                                                                                                                                                                                                                                                                                                                                                                                                                                                                                                                                                                                                                                                                                                                                                                                                                                                                                                                                                                                                                                                                                                                                                                                                                                                                                                                                                                                                                                                                                                                                                                                                                                                                                                                                                                                                                                                                                                                                                                                                                                                                                                                                                                                                                                                                                                                                                                                                                                                                                                                                                                                                                                                                                                                                                                                                                                                                                                                                                                                                                                                                                                                                                                                                                                                                                                                                                                                                                                                                                                                                                                                                                                                                                                                                                                                                                                                                                                                                                                                                                                                                                                                                                                                                                                                                                                                                                                                                                                                                                                                                                                                                                                                                                                                                                                                                                                                                                                                                                                                                                                                                                                                                                                                                                                                                                                                                                                                                                                                                                                                                                                                                                               | GO category               | Go term | E-value  | 0        | 1        | 2        | 3        | 4        | 5        | 6        | 7        | 8        | 9        | 10       | 11       | 12       | 13       | 14       | 15       | 16       | 17       | 18       | 19       | 20        | 21        | 22       | 23       | 24       | 25       |          |
|------------------------|------------|----------|--------|-------|------------|--------------------------------------------------------------------------------------------------------------------------------------------------------------------------------------------------------------------------------------------------------------------------------------------------------------------------------------------------------------------------------------------------------------------------------------------------------------------------------------------------------------------------------------------------------------------------------------------------------------------------------------------------------------------------------------------------------------------------------------------------------------------------------------------------------------------------------------------------------------------------------------------------------------------------------------------------------------------------------------------------------------------------------------------------------------------------------------------------------------------------------------------------------------------------------------------------------------------------------------------------------------------------------------------------------------------------------------------------------------------------------------------------------------------------------------------------------------------------------------------------------------------------------------------------------------------------------------------------------------------------------------------------------------------------------------------------------------------------------------------------------------------------------------------------------------------------------------------------------------------------------------------------------------------------------------------------------------------------------------------------------------------------------------------------------------------------------------------------------------------------------------------------------------------------------------------------------------------------------------------------------------------------------------------------------------------------------------------------------------------------------------------------------------------------------------------------------------------------------------------------------------------------------------------------------------------------------------------------------------------------------------------------------------------------------------------------------------------------------------------------------------------------------------------------------------------------------------------------------------------------------------------------------------------------------------------------------------------------------------------------------------------------------------------------------------------------------------------------------------------------------------------------------------------------------------------------------------------------------------------------------------------------------------------------------------------------------------------------------------------------------------------------------------------------------------------------------------------------------------------------------------------------------------------------------------------------------------------------------------------------------------------------------------------------------------------------------------------------------------------------------------------------------------------------------------------------------------------------------------------------------------------------------------------------------------------------------------------------------------------------------------------------------------------------------------------------------------------------------------------------------------------------------------------------------------------------------------------------------------------------------------------------------------------------------------------------------------------------------------------------------------------------------------------------------------------------------------------------------------------------------------------------------------------------------------------------------------------------------------------------------------------------------------------------------------------------------------------------------------------------------------------------------------------------------------------------------------------------------------------------------------------------------------------------------------------------------------------------------------------------------------------------------------------------------------------------------------------------------------------------------------------------------------------------------------------------------------------------------------------------------------------------------------------------------------------------------------------------------------------------------------------------------------------------------------------------------------------------------------------------------------------------------------------------------------------------------------------------------------------------------------------------------------------------------------------------------------------------------------------------------------------------------------------------------------------------------------------------------------------------------------------------------------------------------------------------------------------------------------------------------------------------------------------------------------------------|---------------------------|---------|----------|----------|----------|----------|----------|----------|----------|----------|----------|----------|----------|----------|----------|----------|----------|----------|----------|----------|----------|----------|----------|-----------|-----------|----------|----------|----------|----------|----------|
| CUST_37651.P4219010886 | IM20253    | 0.042879 | 21     | 15    | 51104825   | Euphasia superba small subunit ribosomal RNA gene                                                                                                                                                                                                                                                                                                                                                                                                                                                                                                                                                                                                                                                                                                                                                                                                                                                                                                                                                                                                                                                                                                                                                                                                                                                                                                                                                                                                                                                                                                                                                                                                                                                                                                                                                                                                                                                                                                                                                                                                                                                                                                                                                                                                                                                                                                                                                                                                                                                                                                                                                                                                                                                                                                                                                                                                                                                                                                                                                                                                                                                                                                                                                                                                                                                                                                                                                                                                                                                                                                                                                                                                                                                                                                                                                                                                                                                                                                                                                                                                                                                                                                                                                                                                                                                                                                                                                                                                                                                                                                                                                                                                                                                                                                                                                                                                                                                                                                                                                                                                                                                                                                                                                                                                                                                                                                                                                                                                                                                                                                                                                                                                                                                                                                                                                                                                                                                                                                                                                                                                                        |                           |         | 746.6817 | 380.7    | 90.7     | 725.1936 | 217.5886 | 858.218  | 594.1197 | 865.4579 | 575.3599 | 739.6144 | 1192.582 | 471.9637 | 516.2214 | 1353.303 | 853.6489 | 716.6989 | 1006.198 | 1028.739 | 888.1875 | 663.5689 | 809.6759 | 882.8865  | 1131.289  | 471.9637 | 505.3693 | 388.966  | 466.1947 | 987.1593 |
| CUST_74400.P4219010886 | N21555     | 0.042879 | 15     | 15    | 327261663  | PREDICTED: Anolis carolinensis karolinensis alpha 15                                                                                                                                                                                                                                                                                                                                                                                                                                                                                                                                                                                                                                                                                                                                                                                                                                                                                                                                                                                                                                                                                                                                                                                                                                                                                                                                                                                                                                                                                                                                                                                                                                                                                                                                                                                                                                                                                                                                                                                                                                                                                                                                                                                                                                                                                                                                                                                                                                                                                                                                                                                                                                                                                                                                                                                                                                                                                                                                                                                                                                                                                                                                                                                                                                                                                                                                                                                                                                                                                                                                                                                                                                                                                                                                                                                                                                                                                                                                                                                                                                                                                                                                                                                                                                                                                                                                                                                                                                                                                                                                                                                                                                                                                                                                                                                                                                                                                                                                                                                                                                                                                                                                                                                                                                                                                                                                                                                                                                                                                                                                                                                                                                                                                                                                                                                                                                                                                                                                                                                                                     |                           |         | 9.93E-71 | 221.425  | 170.003  | 163.0402 | 174.1985 | 186.006  | 156.6119 | 170.4197 | 153.5797 | 175.4895 | 188.064  | 196.5334 | 208.2116 | 187.417  | 203.685  | 193.8618 | 205.9692 | 213.6088 | 239.9799 | 219.175  | 186.0811 | 143.7889  | 193.0474  | 177.855  | 187.782  | 164.242  | 142.549  | 193.6788 |
| CUST_26540.P4219010886 | N44549     | 0.042881 | 18     | 15    | 7328389    | 120.9878 86.0603 10.07834 64.92708 80.62537 18.22317 81.45472 67.69277 87.18862 196.3364 208.2116 85.726 105.826 120.854 107.1362 131.846 82.0089 93.22679 89.81974 94.36809 79.4295 109.604 81.42045 62.4885 95.99365 87.66771 64.1178 97.16749                                                                                                                                                                                                                                                                                                                                                                                                                                                                                                                                                                                                                                                                                                                                                                                                                                                                                                                                                                                                                                                                                                                                                                                                                                                                                                                                                                                                                                                                                                                                                                                                                                                                                                                                                                                                                                                                                                                                                                                                                                                                                                                                                                                                                                                                                                                                                                                                                                                                                                                                                                                                                                                                                                                                                                                                                                                                                                                                                                                                                                                                                                                                                                                                                                                                                                                                                                                                                                                                                                                                                                                                                                                                                                                                                                                                                                                                                                                                                                                                                                                                                                                                                                                                                                                                                                                                                                                                                                                                                                                                                                                                                                                                                                                                                                                                                                                                                                                                                                                                                                                                                                                                                                                                                                                                                                                                                                                                                                                                                                                                                                                                                                                                                                                                                                                                                         |                           |         | 5.98961  | 58.6319  | 54.5771  | 41.44034 | 43.3161  | 45.6424  | 45.0559  | 50.1879  | 41.7084  | 43.3161  | 45.0559  | 50.1879  | 41.7084  | 43.3161  | 45.0559  | 50.1879  | 41.7084  | 43.3161  | 45.0559  | 50.1879  | 41.7084  | 43.3161   | 45.0559   | 50.1879  | 41.7084  | 43.3161  | 45.0559  | 50.1879  |
| CUST_49490.P4219010886 | N15847     | 0.0429   | 12     | 0     | 51104825   | Euphasia superba small subunit ribosomal RNA gene                                                                                                                                                                                                                                                                                                                                                                                                                                                                                                                                                                                                                                                                                                                                                                                                                                                                                                                                                                                                                                                                                                                                                                                                                                                                                                                                                                                                                                                                                                                                                                                                                                                                                                                                                                                                                                                                                                                                                                                                                                                                                                                                                                                                                                                                                                                                                                                                                                                                                                                                                                                                                                                                                                                                                                                                                                                                                                                                                                                                                                                                                                                                                                                                                                                                                                                                                                                                                                                                                                                                                                                                                                                                                                                                                                                                                                                                                                                                                                                                                                                                                                                                                                                                                                                                                                                                                                                                                                                                                                                                                                                                                                                                                                                                                                                                                                                                                                                                                                                                                                                                                                                                                                                                                                                                                                                                                                                                                                                                                                                                                                                                                                                                                                                                                                                                                                                                                                                                                                                                                        |                           |         | 111.6728 | 96.9056  | 62.3967  | 74.8859  | 20.2849  | 96.8237  | 81.7063  | 55.6661  | 81.8947  | 67.45213 | 87.71808 | 94.375   | 77.1205  | 95.16133 | 98.0618  | 112.5002 | 88.3275  | 115.964  | 76.7834  | 85.4535  | 77.38027 | 93.6666   | 109.91739 | 81.0164  | 102.580  | 105.155  |          |          |
| CUST_51757.P4219010886 | E1547      | 0.042905 | 12     | 0     | 321472355  | hypothetical protein DAPPURAT_100611 [Daphn] Cellular component organization                                                                                                                                                                                                                                                                                                                                                                                                                                                                                                                                                                                                                                                                                                                                                                                                                                                                                                                                                                                                                                                                                                                                                                                                                                                                                                                                                                                                                                                                                                                                                                                                                                                                                                                                                                                                                                                                                                                                                                                                                                                                                                                                                                                                                                                                                                                                                                                                                                                                                                                                                                                                                                                                                                                                                                                                                                                                                                                                                                                                                                                                                                                                                                                                                                                                                                                                                                                                                                                                                                                                                                                                                                                                                                                                                                                                                                                                                                                                                                                                                                                                                                                                                                                                                                                                                                                                                                                                                                                                                                                                                                                                                                                                                                                                                                                                                                                                                                                                                                                                                                                                                                                                                                                                                                                                                                                                                                                                                                                                                                                                                                                                                                                                                                                                                                                                                                                                                                                                                                                             | Cytoskeleton organization |         | 6.45E-30 | 613.691  | 60.128   | 5340.717 | 8138.075 | 424.852  | 106.677  | 667.9096 | 51.763   | 161.8217 | 61.8474  | 406.470  | 394.574  | 513.907  | 387.1    | 607.985  | 967.0486 | 566.379  | 115.964  | 77.38027 | 93.6666  | 109.91739 | 81.0164   | 102.580  | 105.155  |          |          |          |
| CUST_49154.P4219010886 | M84429     | 0.042908 | 18     | 12    | 321471830  | hypothetical protein DAPPURAT_302359 [Daphn] Transport                                                                                                                                                                                                                                                                                                                                                                                                                                                                                                                                                                                                                                                                                                                                                                                                                                                                                                                                                                                                                                                                                                                                                                                                                                                                                                                                                                                                                                                                                                                                                                                                                                                                                                                                                                                                                                                                                                                                                                                                                                                                                                                                                                                                                                                                                                                                                                                                                                                                                                                                                                                                                                                                                                                                                                                                                                                                                                                                                                                                                                                                                                                                                                                                                                                                                                                                                                                                                                                                                                                                                                                                                                                                                                                                                                                                                                                                                                                                                                                                                                                                                                                                                                                                                                                                                                                                                                                                                                                                                                                                                                                                                                                                                                                                                                                                                                                                                                                                                                                                                                                                                                                                                                                                                                                                                                                                                                                                                                                                                                                                                                                                                                                                                                                                                                                                                                                                                                                                                                                                                   | Ion transport             |         | 1.17E-39 | 439.7553 | 26.42231 | 62.3967  | 17.5583  | 264.1236 | 206.9494 | 588.9896 | 531.824  | 38.989   | 49.0126  | 26.42231 | 62.3967  | 17.5583  | 264.1236 | 206.9494 | 588.9896 | 531.824  | 38.989   | 49.0126  | 26.42231 | 62.3967   | 17.5583   | 264.1236 | 206.9494 | 588.9896 | 531.824  |          |
| CUST_49138.P4219010886 | N40429     | 0.042924 | 24     | 18    | 51104825   | Euphasia superba small subunit ribosomal RNA gene                                                                                                                                                                                                                                                                                                                                                                                                                                                                                                                                                                                                                                                                                                                                                                                                                                                                                                                                                                                                                                                                                                                                                                                                                                                                                                                                                                                                                                                                                                                                                                                                                                                                                                                                                                                                                                                                                                                                                                                                                                                                                                                                                                                                                                                                                                                                                                                                                                                                                                                                                                                                                                                                                                                                                                                                                                                                                                                                                                                                                                                                                                                                                                                                                                                                                                                                                                                                                                                                                                                                                                                                                                                                                                                                                                                                                                                                                                                                                                                                                                                                                                                                                                                                                                                                                                                                                                                                                                                                                                                                                                                                                                                                                                                                                                                                                                                                                                                                                                                                                                                                                                                                                                                                                                                                                                                                                                                                                                                                                                                                                                                                                                                                                                                                                                                                                                                                                                                                                                                                                        |                           |         | 35.7474  | 34.8025  | 42.6889  | 24.55823 | 32.9164  | 33.5584  | 27.14155 | 35.8237  | 37.8173  | 25.7082  | 42.7555  | 74.7202  | 42.7788  | 62.0409  | 54.6846  | 74.6868  | 115.5442 | 45.7521  | 47.3531  | 60.4255  | 51.0482  | 63.68912  | 35.676    | 41.417   | 32.9164  | 33.5584  | 27.14155 |          |
| CUST_31730.P4219010886 | N40925     | 0.042948 | 15     | 9     | 51104825   | Euphasia superba small subunit ribosomal RNA gene                                                                                                                                                                                                                                                                                                                                                                                                                                                                                                                                                                                                                                                                                                                                                                                                                                                                                                                                                                                                                                                                                                                                                                                                                                                                                                                                                                                                                                                                                                                                                                                                                                                                                                                                                                                                                                                                                                                                                                                                                                                                                                                                                                                                                                                                                                                                                                                                                                                                                                                                                                                                                                                                                                                                                                                                                                                                                                                                                                                                                                                                                                                                                                                                                                                                                                                                                                                                                                                                                                                                                                                                                                                                                                                                                                                                                                                                                                                                                                                                                                                                                                                                                                                                                                                                                                                                                                                                                                                                                                                                                                                                                                                                                                                                                                                                                                                                                                                                                                                                                                                                                                                                                                                                                                                                                                                                                                                                                                                                                                                                                                                                                                                                                                                                                                                                                                                                                                                                                                                                                        |                           |         | 21.0033  | 29.9638  | 18.2615  | 30.90701 | 11.1175  | 20.62741 | 20.34203 | 20.34203 | 20.34203 | 20.34203 | 20.34203 | 20.34203 | 20.34203 | 20.34203 | 20.34203 | 20.34203 | 20.34203 | 20.34203 | 20.34203 | 20.34203 | 20.34203 | 20.34203  | 20.34203  | 20.34203 | 20.34203 | 20.34203 | 20.34203 |          |
| CUST_10629.P4219010886 | N26541     | 0.042944 | 15     | 9     | 1342.338   | 1936.604 1                                                                                                                                                                                                                                                                                                                                                                                                                                                                                                                                                                                                                                                                                                                                                                                                                                                                                                                                                                                                                                                                                                                                                                                                                                                                                                                                                                                                                                                                                                                                                                                                                                                                                                                                                                                                                                                                                                                                                                                                                                                                                                                                                                                                                                                                                                                                                                                                                                                                                                                                                                                                                                                                                                                                                                                                                                                                                                                                                                                                                                                                                                                                                                                                                                                                                                                                                                                                                                                                                                                                                                                                                                                                                                                                                                                                                                                                                                                                                                                                                                                                                                                                                                                                                                                                                                                                                                                                                                                                                                                                                                                                                                                                                                                                                                                                                                                                                                                                                                                                                                                                                                                                                                                                                                                                                                                                                                                                                                                                                                                                                                                                                                                                                                                                                                                                                                                                                                                                                                                                                                                               |                           |         | 1342.338 | 1936.604 | 1748.457 | 1284.158 | 1832.4   | 1902.402 | 1761.883 | 1137.91  | 1954.96  | 2111.683 | 185.755  | 2314.02  | 1623.132 | 2610.308 | 1663.806 | 2130.131 | 1715.766 | 1586.719 | 340.259  | 34.542   | 34.542   | 34.542    | 34.542    | 34.542   | 34.542   | 34.542   | 34.542   |          |
| CUST_43953.P4219010886 | M66453     | 0.042951 | 24     | 18    | 48.17972   | 55.62388 44.53184 25.04089 36.27746 25.10622 32.35642 41.96975 25.6829 25.10622 32.35642 41.96975 25.6829 25.10622 32.35642 41.96975 25.6829 25.10622 32.35642 41.96975 25.6829 25.10622 32.35642 41.96975 25.6829 25.10622 32.35642 41.96975 25.6829 25.10622 32.35642 41.96975 25.6829 25.10622 32.35642 41.96975 25.6829 25.10622 32.35642 41.96975 25.6829 25.10622 32.35642 41.96975 25.6829 25.10622 32.35642 41.96975 25.6829 25.10622 32.35642 41.96975 25.6829 25.10622 32.35642 41.96975 25.6829 25.10622 32.35642 41.96975 25.6829 25.10622 32.35642 41.96975 25.6829 25.10622 32.35642 41.96975 25.6829 25.10622 32.35642 41.96975 25.6829 25.10622 32.35642 41.96975 25.6829 25.10622 32.35642 41.96975 25.6829 25.10622 32.35642 41.96975 25.6829 25.10622 32.35642 41.96975 25.6829 25.10622 32.35642 41.96975 25.6829 25.10622 32.35642 41.96975 25.6829 25.10622 32.35642 41.96975 25.6829 25.10622 32.35642 41.96975 25.6829 25.10622 32.35642 41.96975 25.6829 25.10622 32.35642 41.96975 25.6829 25.10622 32.35642 41.96975 25.6829 25.10622 32.35642 41.96975 25.6829 25.10622 32.35642 41.96975 25.6829 25.10622 32.35642 41.96975 25.6829 25.10622 32.35642 41.96975 25.6829 25.10622 32.35642 41.96975 25.6829 25.10622 32.35642 41.96975 25.6829 25.10622 32.35642 41.96975 25.6829 25.10622 32.35642 41.96975 25.6829 25.10622 32.35642 41.96975 25.6829 25.10622 32.35642 41.96975 25.6829 25.10622 32.35642 41.96975 25.6829 25.10622 32.35642 41.96975 25.6829 25.10622 32.35642 41.96975 25.6829 25.10622 32.35642 41.96975 25.6829 25.10622 32.35642 41.96975 25.6829 25.10622 32.35642 41.96975 25.6829 25.10622 32.35642 41.96975 25.6829 25.10622 32.35642 41.96975 25.6829 25.10622 32.35642 41.96975 25.6829 25.10622 32.35642 41.96975 25.6829 25.10622 32.35642 41.96975 25.6829 25.10622 32.35642 41.96975 25.6829 25.10622 32.35642 41.96975 25.6829 25.10622 32.35642 41.96975 25.6829 25.10622 32.35642 41.96975 25.6829 25.10622 32.35642 41.96975 25.6829 25.10622 32.35642 41.96975 25.6829 25.10622 32.35642 41.96975 25.6829 25.10622 32.35642 41.96975 25.6829 25.10622 32.35642 41.96975 25.6829 25.10622 32.35642 41.96975 25.6829 25.10622 32.35642 41.96975 25.6829 25.10622 32.35642 41.96975 25.6829 25.10622 32.35642 41.96975 25.6829 25.10622 32.35642 41.96975 25.6829 25.10622 32.35642 41.96975 25.6829 25.10622 32.35642 41.96975 25.6829 25.10622 32.35642 41.96975 25.6829 25.10622 32.35642 41.96975 25.6829 25.10622 32.35642 41.96975 25.6829 25.10622 32.35642 41.96975 25.6829 25.10622 32.35642 41.96975 25.6829 25.10622 32.35642 41.96975 25.6829 25.10622 32.35642 41.96975 25.6829 25.10622 32.35642 41.96975 25.6829 25.10622 32.35642 41.96975 25.6829 25.10622 32.35642 41.96975 25.6829 25.10622 32.35642 41.96975 25.6829 25.10622 32.35642 41.96975 25.6829 25.10622 32.35642 41.96975 25.6829 25.10622 32.35642 41.96975 25.6829 25.10622 32.35642 41.96975 25.6829 25.10622 32.35642 41.96975 25.6829 25.10622 32.35642 41.96975 25.6829 25.10622 32.35642 41.96975 25.6829 25.10622 32.35642 41.96975 25.6829 25.10622 32.35642 41.96975 25.6829 25.10622 32.35642 41.96975 25.6829 25.10622 32.35642 41.96975 25.6829 25.10622 32.35642 41.96975 25.6829 25.10622 32.35642 41.96975 25.6829 25.10622 32.35642 41.96975 25.6829 25.10622 32.35642 41.96975 25.6829 25.10622 32.35642 41.96975 25.6829 25.10622 32.35642 41.96975 25.6829 25.10622 32.35642 41.96975 25.6829 25.10622 32.35642 41.96975 25.6829 25.10622 32.35642 41.96975 25.6829 25.10622 32.35642 41.96975 25.6829 25.10622 32.35642 41.96975 25.6829 25.10622 32.35642 41.96975 25.6829 25.10622 32.35642 41.96975 25.6829 25.10622 32.35642 41.96975 25.6829 25.10622 32.35642 41.96975 25.6829 25.10622 32.35642 41.96975 25.6829 25.10622 32.35642 41.96975 25.6829 25.10622 32.35642 41.96975 25.6829 25.10622 32.35642 41.96975 25.6829 25.10622 32.35642 41.96975 25.6829 25.10622 32.35642 41.96975 25.6829 25.10622 32.35642 41.96975 25.6829 25.10622 32.35642 41.96975 25.6829 25.10622 32.35642 41.96975 25.6829 25.10622 32.35642 41.96975 25.6829 25.10622 32.35642 41.96975 25.6829 25.10622 32.35642 41.96975 25.6829 25.10622 32.35642 41.96975 25.6829 25.10622 32.35642 41.96975 25.6829 25.10622 32.35642 41.96975 25.6829 25.10622 32.35642 41.96975 25.6829 25.10622 32.35642 41.96975 25.6829 25.10622 32.35642 41.96975 25.6829 25.10622 32.35642 41.96975 25.6829 25.10622 32.35642 41.96975 25.6829 25.10622 32.35642 41.96975 25.6829 25.10622 32.35642 41.96975 25.6829 25.10622 32.35642 41.96975 25.6829 25.10622 32.35642 41.96975 25.6829 25.10622 32.35642 41.96975 25.6829 25.10622 32.35642 41.96975 25.6829 25.10622 32.35642 41.96975 25.6829 25.10622 32.35642 41.96975 25.6829 25.10622 32.35642 41.96975 25.6829 25.10622 32.35642 41.96975 25.6829 25.10622 32.35642 41.96975 25.6829 25.10622 32.35642 41.96975 25.6829 25.10622 32.35642 41.96975 25.6829 25.10622 32.35642 41.96975 25.6829 25.10622 32.35642 41.96975 25.6829 25.10622 32.35642 41.96975 25.6829 25.10622 32.35642 41.96975 25.6829 25.10622 32.35642 41.96975 25.6829 25.10622 32.35642 41.96975 25.6829 25.10622 32.35642 41.96975 25.6829 25.10622 32.35642 41.96975 25.6829 25.10622 32.35642 41.96975 25.6829 25.10622 32.35642 41.96975 25.6829 25.10622 32.35642 41.96975 25.6829 25.10622 32.35642 41.96975 25.6829 25.10622 32.35642 41.96975 25.6829 25.10622 32.35642 41.96975 25.6829 25.10622 32.35642 41.96975 25.6829 25.10622 32.35642 41.96975 25.6829 25.10622 32.35642 41.96975 25.6829 25.10622 32.35642 41.96975 25.6829 25.10622 32.35642 41.96975 25.6829 25.10622 32.35642 41.96975 25.6829 25.10622 32.35642 41.96975 25.6829 25.10622 32.35642 41.96975 25.6829 25.10622 32.35642 41.96975 25.6829 25.10622 32.35642 41.96975 25.6829 25.10622 32.35642 41.96975 25.6829 25.10622 32.35642 41.96975 25.6829 25.10622 32.35642 41.96975 25.6829 25.10622 32.35642 41.96975 25.6829 25.10622 32.35642 41.96975 25.6829 25.10622 32.35642 41.96975 25.6829 25.10622 32.35642 41. |                           |         |          |          |          |          |          |          |          |          |          |          |          |          |          |          |          |          |          |          |          |          |          |           |           |          |          |          |          |          |
